# Supplementary material for: Establishment of a 7-gene expression panel to improve the prognosis classification of gastric cancer patients
Source: Front Genet. 2023 Sep 12;14:1206609. doi: 10.3389/fgene.2023.1206609 (PMC10522918; doi:10.3389/fgene.2023.1206609)
Supplement: Supplementary file 7 [file Table1.XLSX]

## Sheet: Supplementary Table 1
TCGA dataset
	Univariate				Multivariate
genes	HR	Lower_CI	Upper_CI	p	HR	Lower_CI	Upper_CI	p	AUC	sensitivity	specificity	Number	n_high	n_low
A1BG	1.76809	1.06234	2.94268	0.0283337	1.56704	0.918148	2.67453	0.0995847	0.546141	0.87218	0.254717	345	274	71
A1CF	0.898945	0.638677	1.26527	0.541299	0.890233	0.623106	1.27188	0.522978	0.492747	0.541353	0.542453	345	177	168
A2BP1	1.35103	0.949542	1.92227	0.0944855	1.33278	0.908667	1.95484	0.141591	0.534278	0.631579	0.457547	345	199	146
A2LD1	0.686925	0.485845	0.971227	0.0335712	0.65781	0.443885	0.974834	0.0368915	0.536565	0.593985	0.54717	345	171	174
A2M	1.62303	1.15348	2.28373	0.00544621	1.28396	0.856154	1.92554	0.226719	0.582388	0.458647	0.698113	345	125	220
A2ML1	0.79115	0.53515	1.16961	0.240198	0.702365	0.454526	1.08534	0.111578	0.531902	0.75188	0.358491	345	110	235
A4GALT	1.49594	1.02222	2.18919	0.0381642	1.25586	0.823694	1.91476	0.289754	0.540077	0.721805	0.382075	345	227	118
A4GNT	1.81973	1.15082	2.87743	0.0104424	1.67882	1.04765	2.69025	0.0312825	0.560789	0.834586	0.29717	345	260	85
AAA1	1.51568	1.07333	2.14033	0.0181823	1.6056	1.11754	2.3068	0.0104354	0.544297	0.548872	0.589623	345	160	185
AAAS	1.25269	0.881124	1.78095	0.209481	1.53095	1.05297	2.2259	0.0257299	0.496808	0.62406	0.429245	345	204	141
AACS	1.01597	0.721877	1.42989	0.927583	0.986457	0.675385	1.4408	0.943761	0.488757	0.503759	0.533019	345	166	179
AACSL	0.854176	0.603128	1.20972	0.374702	0.836277	0.57523	1.21579	0.349008	0.510037	0.406015	0.660377	345	220	125
AADAC	1.72256	1.22259	2.42698	0.00187783	1.59712	1.10484	2.30874	0.0127646	0.570932	0.496241	0.65566	345	139	206
AADACL2	0.933378	0.130164	6.69305	0.945313	1.11885	0.145865	8.58208	0.913967	0.456253	1	0.00943396	345	3	342
AADACL3	1.13663	0.158635	8.14401	0.898571	1.30408	0.177916	9.55862	0.79391	0.466325	1	0.00471698	345	2	343
AADACL4									0.503156	0.744361	0.273585	345	345	0
AADAT	1.67536	1.07539	2.61006	0.0225324	1.46605	0.904721	2.37565	0.120328	0.531175	0.819549	0.287736	345	260	85
AAGAB	0.66508	0.471597	0.937943	0.0200605	0.75413	0.514696	1.10495	0.147642	0.54905	0.43609	0.721698	345	229	116
AAK1	1.66064	1.15846	2.38052	0.00577112	1.48343	0.986191	2.23139	0.0583303	0.556426	0.338346	0.79717	345	88	257
AAMP	0.554836	0.386043	0.797431	0.0014571	0.735931	0.489123	1.10728	0.141276	0.568024	0.676692	0.457547	345	141	204
AANAT	1.27214	0.886059	1.82646	0.192097	1.39998	0.949926	2.06326	0.0890653	0.522344	0.669173	0.415094	345	213	132
AARS	0.717358	0.467137	1.10161	0.129066	0.679785	0.433886	1.06504	0.092011	0.51979	0.81203	0.283019	345	86	259
AARS2	0.789113	0.560599	1.11077	0.174552	0.84827	0.578113	1.24467	0.400259	0.506136	0.466165	0.613208	345	202	143
AARSD1	1.76536	1.19839	2.60055	0.00403163	2.19392	1.41553	3.40035	0.000440871	0.546106	0.263158	0.863208	345	64	281
AASDH	0.917839	0.648494	1.29905	0.628573	1.10095	0.762582	1.58944	0.607746	0.513193	0.609023	0.466981	345	152	193
AASDHPPT	1.18613	0.844114	1.66672	0.325352	1.27216	0.879994	1.8391	0.200503	0.479784	0.496241	0.533019	345	165	180
AASS	1.67554	1.17366	2.39203	0.00448995	1.44304	0.962616	2.16323	0.0758135	0.571358	0.646617	0.514151	345	189	156
AATF	0.593757	0.418802	0.841799	0.00342351	0.603176	0.407519	0.89277	0.0115071	0.554086	0.413534	0.726415	345	233	112
AATK	0.604716	0.413602	0.884139	0.00944961	0.748677	0.496998	1.12781	0.16617	0.566853	0.729323	0.415094	345	125	220
ABAT	0.837245	0.595669	1.17679	0.306441	0.811491	0.569377	1.15656	0.247918	0.514186	0.518797	0.575472	345	187	158
ABCA1	1.67889	1.15216	2.44642	0.00698977	1.59677	1.06296	2.39867	0.0241939	0.591857	0.714286	0.462264	345	209	136
ABCA10	1.62238	1.14952	2.28977	0.00591264	1.41181	0.974134	2.04613	0.0685234	0.552525	0.43609	0.721698	345	117	228
ABCA11P	1.29514	0.787054	2.13124	0.308826	1.35943	0.803178	2.30092	0.252771	0.490814	0.864662	0.169811	345	291	54
ABCA12	0.752659	0.530132	1.06859	0.112068	0.792996	0.541558	1.16117	0.233265	0.518708	0.62406	0.45283	345	147	198
ABCA13	1.41326	0.965279	2.06914	0.0753563	1.3448	0.867773	2.08406	0.185028	0.532558	0.721805	0.372642	345	229	116
ABCA17P	1.26226	0.860738	1.85109	0.233156	1.21347	0.805452	1.82818	0.354807	0.49374	0.729323	0.320755	345	241	104
ABCA2	0.721364	0.512655	1.01504	0.0608914	0.786308	0.546521	1.1313	0.195226	0.497872	0.541353	0.514151	345	171	174
ABCA3	1.46592	1.04042	2.06544	0.0287815	1.33755	0.915404	1.95438	0.132802	0.573805	0.56391	0.580189	345	164	181
ABCA4	1.9254	1.3682	2.70952	0.000170955	1.4246	0.975545	2.08035	0.0669804	0.564814	0.541353	0.65566	345	145	200
ABCA5	1.22046	0.864839	1.7223	0.256938	1.23557	0.837452	1.82296	0.286418	0.539084	0.571429	0.528302	345	176	169
ABCA6	1.99898	1.42203	2.81	6.7108e-05	1.85447	1.23037	2.79513	0.00317433	0.617712	0.481203	0.721698	345	123	222
ABCA7	0.93849	0.648696	1.35774	0.736182	0.913371	0.611259	1.3648	0.65834	0.496773	0.691729	0.367925	345	226	119
ABCA8	1.88573	1.33668	2.66031	0.000302996	1.60546	1.07981	2.387	0.0193153	0.592992	0.571429	0.636792	345	153	192
ABCA9	1.83095	1.3009	2.57698	0.000523462	1.66096	1.10796	2.48999	0.01404	0.59207	0.451128	0.721698	345	119	226
ABCB1	1.65543	1.05534	2.59674	0.028201	1.0546	0.641083	1.73483	0.834204	0.518371	0.827068	0.278302	345	263	82
ABCB10	1.19946	0.851208	1.6902	0.298644	1.4918	1.03379	2.15271	0.0325504	0.483827	0.56391	0.504717	345	180	165
ABCB11	1.32682	0.807031	2.1814	0.264939	1.23035	0.72929	2.07567	0.437223	0.503866	0.135338	0.915094	345	36	309
ABCB4	1.51465	1.07727	2.1296	0.0169368	1.16351	0.78692	1.72033	0.44785	0.54607	0.526316	0.599057	345	155	190
ABCB5	1.81035	1.28474	2.55099	0.000694178	1.73565	1.20063	2.50907	0.00336345	0.569762	0.518797	0.617925	345	150	195
ABCB6	1.10608	0.786082	1.55635	0.562838	1.08267	0.720823	1.62615	0.701946	0.500674	0.526316	0.514151	345	173	172
ABCB7	0.72839	0.517626	1.02497	0.0689985	0.734617	0.509631	1.05893	0.0983174	0.508086	0.503759	0.580189	345	190	155
ABCB8	0.615207	0.437102	0.865885	0.00534079	0.627719	0.434671	0.906504	0.0130109	0.530111	0.473684	0.636792	345	206	139
ABCB9	0.412708	0.209143	0.814408	0.010713	0.44362	0.21849	0.900721	0.0244917	0.493971	0.075188	0.966981	345	329	16
ABCC1	1.39363	0.895613	2.16857	0.141218	1.42051	0.890744	2.26534	0.140458	0.526138	0.819549	0.283019	345	261	84
ABCC10	1.27165	0.901592	1.79361	0.170817	1.18275	0.818757	1.70857	0.371112	0.548872	0.428571	0.683962	345	124	221
ABCC11	1.70758	1.19305	2.44403	0.0034469	2.00761	1.34252	3.00219	0.000687233	0.54506	0.345865	0.79717	345	89	256
ABCC12	0.998153	0.24674	4.03788	0.997931	1.02976	0.235341	4.50586	0.968935	0.470067	0.992481	0.0141509	345	5	340
ABCC13	0.818175	0.56604	1.18262	0.285692	0.853282	0.577635	1.26047	0.425405	0.516722	0.699248	0.40566	345	127	218
ABCC2	0.691859	0.462511	1.03494	0.0729996	0.573232	0.371026	0.885639	0.0121714	0.5266	0.774436	0.349057	345	105	240
ABCC3	1.29812	0.908487	1.85486	0.151888	1.30463	0.899647	1.89192	0.160829	0.502305	0.646617	0.415094	345	210	135
ABCC4	1.67651	1.11615	2.5182	0.0127972	1.40686	0.865011	2.28811	0.168948	0.529579	0.774436	0.353774	345	240	105
ABCC5	1.52911	1.02205	2.28773	0.0388206	1.58071	1.02356	2.44113	0.0389263	0.526812	0.766917	0.34434	345	241	104
ABCC6	0.705821	0.389259	1.27982	0.251214	0.746736	0.404205	1.37953	0.351048	0.49241	0.917293	0.132075	345	40	305
ABCC6P1	0.896394	0.637794	1.25985	0.528808	0.730344	0.503562	1.05926	0.0976217	0.496985	0.518797	0.537736	345	179	166
ABCC6P2	1.29746	0.920936	1.82792	0.136487	1.30479	0.893617	1.90515	0.168339	0.52628	0.556391	0.518868	345	176	169
ABCC8	1.36547	0.960845	1.94047	0.0823503	1.34216	0.913443	1.97209	0.133914	0.527717	0.62406	0.457547	345	198	147
ABCC9	1.73373	1.22322	2.4573	0.00198697	1.46952	0.991215	2.17862	0.0553598	0.585438	0.609023	0.556604	345	175	170
ABCD1	0.714468	0.506219	1.00839	0.0558167	0.709458	0.489972	1.02726	0.0691341	0.525252	0.586466	0.5	345	162	183
ABCD2	1.69359	1.14096	2.5139	0.00894107	1.8822	1.18269	2.99544	0.00763621	0.543003	0.24812	0.877358	345	59	286
ABCD3	0.870246	0.616464	1.2285	0.429491	1.04599	0.716992	1.52596	0.815481	0.509221	0.43609	0.613208	345	206	139
ABCD4	1.24456	0.838883	1.84643	0.277012	1.36392	0.906857	2.05135	0.136107	0.501206	0.24812	0.79717	345	76	269
ABCE1	0.69059	0.454821	1.04858	0.0823229	0.692847	0.438018	1.09593	0.116781	0.529791	0.796992	0.306604	345	93	252
ABCF1	0.810239	0.575313	1.14109	0.228406	0.632753	0.428615	0.934118	0.0212851	0.519506	0.451128	0.622642	345	206	139
ABCF2	0.52725	0.37434	0.742621	0.000249515	0.580728	0.398783	0.845686	0.00459755	0.561711	0.496241	0.665094	345	209	136
ABCF3	1.43594	0.526531	3.91603	0.479665	1.63314	0.575283	4.63623	0.356849	0.475919	0.969925	0.0518868	345	330	15
ABCG1	1.72923	1.21674	2.45759	0.0022594	1.52858	1.06068	2.20288	0.0228505	0.587424	0.62406	0.551887	345	178	167
ABCG2	1.83153	1.25609	2.6706	0.00166178	1.76682	1.13322	2.75468	0.0120087	0.540112	0.714286	0.433962	345	215	130
ABCG4	1.43292	0.980419	2.09426	0.0631932	1.15404	0.758253	1.75641	0.503779	0.554724	0.721805	0.391509	345	225	120
ABCG5	1.92303	1.15479	3.20235	0.0119685	1.95418	1.14059	3.34812	0.0147357	0.531458	0.87218	0.235849	345	278	67
ABCG8	1.5309	1.07854	2.17299	0.0171685	1.41853	0.959934	2.09622	0.0793046	0.539332	0.616541	0.514151	345	185	160
ABHD1	1.39776	0.992277	1.96893	0.0554142	1.32355	0.904382	1.937	0.149103	0.54068	0.458647	0.688679	345	127	218
ABHD10	0.65142	0.452587	0.937606	0.0210717	0.72379	0.485105	1.07992	0.113337	0.570365	0.684211	0.462264	345	141	204
ABHD11	0.646005	0.459092	0.909019	0.0121644	0.516631	0.346826	0.769572	0.0011615	0.536814	0.518797	0.584906	345	189	156
ABHD12	0.946835	0.671127	1.33581	0.755715	0.947673	0.642157	1.39854	0.78664	0.504256	0.43609	0.617925	345	207	138
ABHD12B	1.54176	1.05793	2.24687	0.0242583	1.64051	1.10601	2.43331	0.0138599	0.563005	0.714286	0.462264	345	209	136
ABHD13	0.761344	0.513267	1.12932	0.175287	0.703931	0.462292	1.07188	0.101749	0.525252	0.759398	0.325472	345	102	243
ABHD14A	0.876235	0.574027	1.33755	0.540381	0.827602	0.515264	1.32927	0.433823	0.477089	0.804511	0.235849	345	77	268
ABHD14B	0.575691	0.281525	1.17723	0.130302	0.818961	0.374561	1.79062	0.616803	0.50383	0.947368	0.0990566	345	29	316
ABHD15	1.39811	0.890342	2.19547	0.145529	1.16312	0.729406	1.85474	0.525629	0.51259	0.827068	0.226415	345	274	71
ABHD2	1.09716	0.77814	1.54696	0.59684	1.23107	0.853693	1.77528	0.265693	0.504256	0.43609	0.613208	345	140	205
ABHD3	0.815408	0.579102	1.14814	0.2425	0.838077	0.584231	1.20222	0.337282	0.533551	0.556391	0.523585	345	171	174
ABHD4	1.37211	0.965697	1.94955	0.0775305	1.13281	0.766849	1.67342	0.531033	0.551958	0.37594	0.740566	345	105	240
ABHD5	1.35566	0.94918	1.9362	0.0942943	1.46547	0.998485	2.15085	0.0509125	0.513264	0.353383	0.716981	345	107	238
ABHD6	1.17043	0.827888	1.65469	0.373033	1.46104	1.01447	2.1042	0.041635	0.505001	0.406015	0.665094	345	125	220
ABHD8	1.39963	0.970226	2.01907	0.0721311	1.18548	0.756543	1.85762	0.457786	0.536565	0.684211	0.424528	345	213	132
ABI1	0.76586	0.522219	1.12317	0.172124	0.788143	0.527277	1.17807	0.245691	0.549688	0.736842	0.400943	345	121	224
ABI2	4.74697	1.74317	12.9269	0.00231009	4.53297	1.5214	13.5059	0.00666158	0.544581	0.969925	0.132075	345	313	32
ABI3	1.63176	0.992618	2.68244	0.053514	1.30143	0.75671	2.23828	0.340937	0.533303	0.864662	0.221698	345	280	65
ABI3BP	1.70964	1.1995	2.43674	0.00301659	1.70869	1.11925	2.60854	0.013069	0.577919	0.360902	0.79717	345	91	254
ABL1	1.60202	0.932256	2.75295	0.0880042	1.69955	0.922599	3.13081	0.088847	0.514647	0.112782	0.948113	345	26	319
ABL2	1.49185	1.04298	2.1339	0.0284969	1.1378	0.775967	1.66835	0.508563	0.570506	0.345865	0.773585	345	94	251
ABLIM1	0.691081	0.46573	1.02547	0.0664977	0.727895	0.485036	1.09235	0.125162	0.517981	0.759398	0.353774	345	108	237
ABLIM2	1.42944	0.935645	2.18385	0.0984666	1.23263	0.762453	1.99273	0.393461	0.498723	0.796992	0.278302	345	259	86
ABLIM3	1.9266	1.15751	3.2067	0.0116467	1.44285	0.824026	2.52641	0.199579	0.560611	0.87218	0.25	345	275	70
ABO	0.576101	0.392645	0.845274	0.00481254	0.725044	0.482078	1.09046	0.122573	0.570861	0.736842	0.45283	345	132	213
ABP1	1.28951	0.884483	1.88001	0.186228	1.39672	0.919759	2.12103	0.116986	0.507696	0.714286	0.349057	345	233	112
ABR	0.661223	0.455955	0.958903	0.029165	0.653629	0.442752	0.964943	0.0323935	0.501135	0.308271	0.778302	345	258	87
ABRA	0.737006	0.504188	1.07733	0.115159	0.56883	0.379421	0.852791	0.00631958	0.529508	0.285714	0.806604	345	267	78
ABT1	0.62486	0.439781	0.887827	0.008694	0.6584	0.448622	0.966272	0.0327405	0.539013	0.383459	0.773585	345	247	98
ABTB1	1.23003	0.85687	1.76571	0.261653	1.21419	0.816274	1.80609	0.338085	0.539367	0.669173	0.438679	345	208	137
ABTB2	1.20409	0.855052	1.6956	0.287615	1.11431	0.777435	1.59714	0.55568	0.532061	0.541353	0.566038	345	164	181
ACAA1	1.17876	0.823962	1.68633	0.368036	1.47026	1.01196	2.13613	0.0431432	0.500674	0.345865	0.712264	345	107	238
ACAA2	1.27493	0.869317	1.8698	0.213804	1.29718	0.856545	1.96449	0.219178	0.504646	0.270677	0.783019	345	82	263
ACACA	1.35971	0.940306	1.96618	0.102494	1.58851	1.06583	2.36752	0.0230205	0.526138	0.691729	0.415094	345	216	129
ACACB	1.32195	0.938556	1.86197	0.110241	1.20436	0.824116	1.76005	0.336742	0.532558	0.473684	0.650943	345	137	208
ACAD10	0.977426	0.690807	1.38296	0.897401	1.03247	0.713929	1.49313	0.86521	0.504717	0.413534	0.636792	345	214	131
ACAD11	1.54868	1.09739	2.18557	0.0128207	1.46312	1.01729	2.10433	0.0401296	0.555469	0.571429	0.575472	345	166	179
ACAD8	0.620371	0.366578	1.04987	0.0752959	0.634909	0.364889	1.10475	0.107951	0.498759	0.12782	0.933962	345	315	30
ACAD9	0.98915	0.698771	1.4002	0.95094	1.10698	0.769721	1.592	0.583551	0.503156	0.406015	0.65566	345	127	218
ACADL	1.78759	1.26727	2.52154	0.000934611	1.51232	1.0412	2.19659	0.0298568	0.569159	0.451128	0.674528	345	129	216
ACADM	0.814795	0.571293	1.16209	0.258184	0.928321	0.62403	1.38099	0.713597	0.538374	0.646617	0.45283	345	144	201
ACADS	0.594086	0.407383	0.866355	0.00682507	0.69441	0.462615	1.04235	0.0784366	0.565045	0.721805	0.476415	345	139	206
ACADSB	0.74179	0.469096	1.17301	0.201429	1.0212	0.627723	1.66134	0.932651	0.510108	0.842105	0.212264	345	67	278
ACADVL	1.24867	0.838676	1.85909	0.274128	1.25694	0.823195	1.91924	0.289605	0.504327	0.759398	0.339623	345	241	104
ACAN	0.584711	0.351347	0.973073	0.038923	0.416184	0.241814	0.716288	0.00155371	0.512555	0.879699	0.212264	345	62	283
ACAP1	1.09246	0.775493	1.53899	0.613008	1.09019	0.750202	1.58427	0.650669	0.518407	0.556391	0.514151	345	177	168
ACAP2	0.735468	0.497439	1.0874	0.123561	0.754666	0.498772	1.14185	0.182801	0.516102	0.263158	0.830189	345	275	70
ACAP3	1.6746	1.17086	2.39506	0.00474387	1.50786	1.02165	2.22545	0.038656	0.592708	0.654135	0.566038	345	179	166
ACAT1	1.32135	0.870201	2.00641	0.191018	1.40769	0.90564	2.18806	0.128629	0.501277	0.789474	0.278302	345	258	87
ACAT2	0.77511	0.534877	1.12324	0.17832	0.719692	0.477093	1.08565	0.116842	0.53841	0.308271	0.79717	345	262	83
ACBD3	0.76112	0.516369	1.12188	0.167903	0.704344	0.464928	1.06705	0.0981752	0.510427	0.270677	0.811321	345	270	75
ACBD4	1.20708	0.857403	1.69936	0.280853	1.07165	0.737952	1.55623	0.716215	0.520251	0.541353	0.533019	345	171	174
ACBD5	0.685784	0.48169	0.976354	0.0363729	0.813542	0.547304	1.20929	0.307569	0.553589	0.639098	0.495283	345	154	191
ACBD6	0.928888	0.653851	1.31962	0.680499	0.94859	0.647358	1.38999	0.786589	0.493474	0.398496	0.65566	345	220	125
ACBD7	0.796614	0.4988	1.27224	0.341126	0.980609	0.592572	1.62275	0.939265	0.547383	0.849624	0.245283	345	73	272
ACCN1	1.43212	1.01683	2.01702	0.0398322	1.25435	0.872552	1.80321	0.221044	0.534278	0.443609	0.650943	345	133	212
ACCN2	1.0824	0.769839	1.52187	0.648791	1.02262	0.718693	1.45508	0.901074	0.504823	0.481203	0.589623	345	151	194
ACCN3	0.953597	0.670542	1.35614	0.791434	0.946813	0.650492	1.37812	0.775364	0.498723	0.37594	0.660377	345	122	223
ACCN4	1.41309	0.988319	2.02043	0.058019	1.23191	0.827776	1.83334	0.30387	0.507466	0.345865	0.768868	345	95	250
ACCN5	0.765644	0.471018	1.24456	0.281338	0.860994	0.52106	1.4227	0.55916	0.517875	0.864662	0.198113	345	61	284
ACCS	1.18499	0.838008	1.67563	0.336959	0.973867	0.671642	1.41209	0.888908	0.505763	0.586466	0.485849	345	187	158
ACCSL									0.46762	0	1	345	345	0
ACD	0.721007	0.51186	1.01561	0.0612976	0.637018	0.440597	0.921006	0.0165102	0.508654	0.458647	0.632075	345	207	138
ACE	0.796406	0.560252	1.1321	0.204601	0.7514	0.51713	1.0918	0.133806	0.4939	0.62406	0.448113	345	146	199
ACE2	0.759251	0.532453	1.08265	0.128183	0.808359	0.559975	1.16692	0.256025	0.532593	0.646617	0.462264	345	146	199
ACER1	0.731392	0.404081	1.32383	0.301466	0.67359	0.362682	1.25103	0.21096	0.485157	0.917293	0.127358	345	39	306
ACER2	0.835117	0.594044	1.17402	0.299828	0.972422	0.67979	1.39102	0.878317	0.533657	0.481203	0.627358	345	203	142
ACER3	0.783179	0.556184	1.10282	0.161657	0.69934	0.473462	1.03298	0.0723474	0.494645	0.56391	0.509434	345	167	178
ACHE	0.83293	0.592055	1.1718	0.293885	0.745712	0.507442	1.09586	0.135204	0.462938	0.541353	0.5	345	168	177
ACIN1	1.32088	0.923496	1.88925	0.127486	1.27518	0.878948	1.85003	0.20042	0.523408	0.345865	0.740566	345	101	244
ACLY	1.15902	0.82146	1.63528	0.400791	1.02142	0.694062	1.50318	0.91438	0.53731	0.428571	0.660377	345	129	216
ACMSD	1.14656	0.81498	1.61305	0.432293	0.916326	0.629789	1.33323	0.647866	0.500656	0.458647	0.599057	345	146	199
ACN9	0.796306	0.548846	1.15534	0.230321	0.882365	0.597747	1.3025	0.528791	0.530182	0.706767	0.40566	345	126	219
ACO1	0.706053	0.397641	1.25367	0.234753	0.847194	0.453304	1.58335	0.603264	0.504469	0.909774	0.132075	345	41	304
ACO2	0.605547	0.404442	0.906651	0.0148576	0.82763	0.526047	1.30211	0.413226	0.539686	0.774436	0.34434	345	104	241
ACOT1	1.67686	1.19241	2.35812	0.00296255	1.49421	1.03217	2.1631	0.0333622	0.552206	0.488722	0.627358	345	144	201
ACOT11	0.629804	0.3784	1.04824	0.0752859	0.744019	0.436851	1.26717	0.276422	0.523798	0.879699	0.20283	345	60	285
ACOT12	1.08672	0.64312	1.83629	0.756022	1.13055	0.656139	1.94797	0.658478	0.488598	0.887218	0.136792	345	45	300
ACOT13	1.26828	0.90111	1.78505	0.17293	1.26863	0.882365	1.82399	0.199002	0.488722	0.451128	0.617925	345	141	204
ACOT2	1.84683	1.29905	2.62559	0.000632146	1.84362	1.26452	2.68791	0.00147279	0.544333	0.383459	0.754717	345	103	242
ACOT4	1.42435	1.00291	2.0229	0.0481318	1.35228	0.915704	1.99701	0.129206	0.513832	0.601504	0.476415	345	191	154
ACOT6	1.64968	1.16999	2.32606	0.00429697	1.47898	1.03201	2.11953	0.0330395	0.55749	0.443609	0.726415	345	117	228
ACOT7	0.67344	0.477409	0.949966	0.0242977	0.714279	0.489348	1.0426	0.0811997	0.565116	0.488722	0.636792	345	204	141
ACOT8	0.773525	0.484902	1.23394	0.281152	0.694462	0.420863	1.14592	0.153605	0.520748	0.849624	0.212264	345	66	279
ACOT9	1.56131	1.08479	2.24716	0.0164842	1.56956	1.08127	2.27835	0.017744	0.571109	0.676692	0.481132	345	200	145
ACOX1	1.20716	0.836482	1.74211	0.314437	1.5837	1.06155	2.3627	0.0242843	0.518052	0.315789	0.75	345	95	250
ACOX2	2.07292	1.28469	3.34476	0.00282439	1.74174	1.03737	2.92438	0.0358401	0.555433	0.849624	0.278302	345	266	79
ACOX3	0.817366	0.576803	1.15826	0.256837	1.11339	0.763324	1.62399	0.577059	0.510746	0.616541	0.433962	345	144	201
ACOXL	1.50934	1.05287	2.1637	0.0250692	1.59213	1.07066	2.36757	0.0216063	0.54928	0.338346	0.820755	345	83	262
ACP1	0.663672	0.455152	0.967722	0.0331331	0.857321	0.571378	1.28636	0.457119	0.570187	0.721805	0.433962	345	130	215
ACP2	0.780248	0.554814	1.09728	0.15377	0.698229	0.488127	0.998764	0.0492137	0.500745	0.518797	0.556604	345	183	162
ACP5	1.37242	0.957156	1.96785	0.0851055	1.22633	0.846941	1.77566	0.279998	0.511597	0.661654	0.424528	345	210	135
ACP6	0.734396	0.521813	1.03358	0.0766405	0.82952	0.58083	1.18469	0.303993	0.523762	0.518797	0.627358	345	198	147
ACPL2	0.714611	0.507599	1.00605	0.0541762	0.847315	0.559141	1.28401	0.434669	0.533551	0.556391	0.551887	345	177	168
ACPP	0.815713	0.579046	1.14911	0.244009	0.874382	0.60816	1.25714	0.468673	0.521351	0.466165	0.627358	345	205	140
ACPT	1.28242	0.473085	3.47636	0.624913	1.70884	0.608442	4.79938	0.309173	0.475316	0.977444	0.0377358	345	12	333
ACR	1.79517	1.17577	2.74087	0.00672954	1.57219	1.00834	2.45134	0.0458653	0.568733	0.796992	0.349057	345	244	101
ACRBP	0.705239	0.491187	1.01257	0.0584539	0.832056	0.56818	1.21848	0.344833	0.537204	0.676692	0.466981	345	143	202
ACRC	1.57707	0.92121	2.69989	0.0967563	1.00278	0.54811	1.83462	0.992803	0.509824	0.887218	0.212264	345	285	60
ACRV1	0.592403	0.420619	0.834345	0.00273112	0.557028	0.3865	0.802795	0.00170161	0.571446	0.56391	0.636792	345	194	151
ACSBG1	2.31337	1.4068	3.80415	0.000949968	2.22919	1.32048	3.76326	0.00269558	0.557313	0.864662	0.29717	345	264	81
ACSBG2	1.27851	0.908853	1.79851	0.158222	1.1767	0.81483	1.69929	0.385493	0.514257	0.526316	0.556604	345	164	181
ACSF2	1.53707	1.07431	2.19915	0.0186636	1.45993	0.965501	2.20754	0.0728851	0.521173	0.353383	0.731132	345	104	241
ACSF3	0.74664	0.5188	1.07454	0.115737	0.762755	0.519968	1.11891	0.165971	0.526866	0.684211	0.410377	345	130	215
ACSL1	1.14309	0.79034	1.65329	0.47752	1.24238	0.829504	1.86076	0.292338	0.509292	0.691729	0.367925	345	226	119
ACSL3	1.16105	0.825334	1.63332	0.391151	1.16918	0.824546	1.65785	0.380371	0.50688	0.473684	0.584906	345	151	194
ACSL4	0.679488	0.417303	1.1064	0.120311	0.584291	0.349598	0.976538	0.0403097	0.511456	0.150376	0.915094	345	308	37
ACSL5	0.733736	0.51289	1.04968	0.0901509	0.814861	0.562535	1.18037	0.27886	0.543481	0.661654	0.443396	345	140	205
ACSL6	1.53353	1.04763	2.24481	0.0278572	1.25309	0.836157	1.87792	0.274375	0.569868	0.721805	0.438679	345	215	130
ACSM1	1.41942	1.00711	2.00054	0.045456	1.52368	1.04383	2.22411	0.0290906	0.508512	0.518797	0.537736	345	167	178
ACSM2A	1.31112	0.927309	1.8538	0.125301	1.30432	0.899396	1.89154	0.161251	0.524436	0.406015	0.665094	345	125	220
ACSM2B	0.866678	0.574073	1.30843	0.495972	0.783967	0.507697	1.21057	0.272234	0.485707	0.789474	0.254717	345	83	262
ACSM3	1.80287	0.867837	3.74535	0.114114	1.81242	0.85647	3.83534	0.119981	0.488757	0.93985	0.0943396	345	317	28
ACSM4									0.471716	0	1	345	345	0
ACSM5	1.64869	1.16969	2.32385	0.00430402	1.78121	1.20574	2.63133	0.00373501	0.583203	0.443609	0.731132	345	116	229
ACSS1	0.911646	0.640446	1.29769	0.607612	0.883632	0.595002	1.31227	0.539794	0.520889	0.639098	0.419811	345	138	207
ACSS2	0.845489	0.599596	1.19222	0.338452	0.87889	0.610149	1.266	0.488124	0.510072	0.511278	0.584906	345	190	155
ACSS3	2.42349	1.5045	3.90385	0.00027352	1.97353	1.16722	3.33686	0.0111813	0.589339	0.849624	0.311321	345	259	86
ACTA1	1.46594	1.04079	2.06475	0.0286162	1.28792	0.891471	1.86068	0.177673	0.55045	0.556391	0.556604	345	168	177
ACTA2	2.40473	1.50557	3.84089	0.000240118	2.04754	1.23585	3.39233	0.00540217	0.563165	0.842105	0.306604	345	259	86
ACTB	1.37503	0.978484	1.9323	0.0665559	1.55545	1.08663	2.22654	0.0157807	0.566038	0.496241	0.641509	345	142	203
ACTBL2	1.85422	1.18139	2.91024	0.00725837	1.83831	1.15042	2.93752	0.0108989	0.575525	0.827068	0.391509	345	239	106
ACTC1	1.30531	0.895261	1.90317	0.166087	1.01739	0.671577	1.54127	0.935166	0.512803	0.285714	0.778302	345	85	260
ACTG1	1.39844	0.903186	2.16525	0.132721	1.29194	0.806341	2.06997	0.286876	0.529827	0.81203	0.268868	345	263	82
ACTG2	1.54031	1.06535	2.22703	0.0216479	1.48537	0.980061	2.2512	0.0621775	0.535218	0.308271	0.801887	345	83	262
ACTL6A	0.722191	0.506947	1.02883	0.071455	0.676303	0.460395	0.993465	0.0462196	0.557668	0.639098	0.5	345	155	190
ACTL6B	1.64407	0.229072	11.7996	0.621011	1.11916	0.149457	8.38053	0.912729	0.44955	1	0.00471698	345	2	343
ACTL7A	1.24283	0.668776	2.30965	0.491726	1.48539	0.788436	2.79844	0.2208	0.481966	0.924812	0.0754717	345	27	318
ACTL7B	0.818133	0.549583	1.21791	0.322742	0.742133	0.490386	1.12312	0.158325	0.509186	0.766917	0.283019	345	92	253
ACTL8	0.587459	0.216865	1.59135	0.295454	0.546223	0.195274	1.5279	0.249211	0.484005	0.977444	0.0660377	345	18	327
ACTL9	1.00885	0.528841	1.92454	0.978672	0.871781	0.450147	1.68834	0.684086	0.487977	0.932331	0.0849057	345	28	317
ACTN1	1.9243	1.13833	3.25296	0.0145397	1.6353	0.925614	2.88911	0.0903107	0.557384	0.879699	0.235849	345	279	66
ACTN2	1.61067	1.10174	2.35468	0.013893	1.56843	1.04152	2.36191	0.0311825	0.549865	0.278195	0.834906	345	72	273
ACTN3	1.38147	0.983011	1.94143	0.0627064	1.26341	0.873596	1.82715	0.214208	0.535803	0.511278	0.59434	345	154	191
ACTN4	0.870546	0.598957	1.26529	0.46744	0.737513	0.493426	1.10234	0.137598	0.50688	0.308271	0.745283	345	251	94
ACTR10	1.59925	1.11073	2.30264	0.0115828	1.35833	0.923239	1.99845	0.120052	0.52394	0.323308	0.764151	345	93	252
ACTR1A	1.32358	0.820432	2.13531	0.250615	1.3241	0.781102	2.24459	0.297166	0.499326	0.150376	0.924528	345	36	309
ACTR1B	0.820802	0.577936	1.16573	0.269918	0.958936	0.662094	1.38886	0.824419	0.519861	0.616541	0.466981	345	151	194
ACTR2	0.859818	0.597072	1.23819	0.416951	0.816545	0.555025	1.20129	0.303521	0.553802	0.676692	0.438679	345	137	208
ACTR3	0.870624	0.595388	1.2731	0.474859	0.905599	0.606312	1.35262	0.628092	0.502908	0.729323	0.334906	345	108	237
ACTR3B	0.605306	0.430007	0.852067	0.00400706	0.632741	0.430708	0.929542	0.0196864	0.550823	0.473684	0.665094	345	212	133
ACTR3C	0.52025	0.36534	0.740843	0.000290974	0.506221	0.34576	0.741149	0.000465215	0.58925	0.639098	0.54717	345	165	180
ACTR5	0.753451	0.534865	1.06137	0.105385	0.745855	0.511655	1.08725	0.12728	0.548908	0.451128	0.665094	345	215	130
ACTR6	0.77892	0.52706	1.15113	0.209947	1.11342	0.730098	1.69798	0.617812	0.561002	0.75188	0.391509	345	117	228
ACTR8	1.22788	0.867195	1.73858	0.2473	1.38085	0.959704	1.98682	0.082141	0.537949	0.601504	0.495283	345	187	158
ACTRT1	1.15937	0.64009	2.09992	0.625611	1.45195	0.782271	2.69491	0.237294	0.499326	0.917293	0.0943396	345	32	313
ACTRT2	0.965044	0.238578	3.90359	0.9602	0.965289	0.235274	3.96042	0.96088	0.472124	0.992481	0.0141509	345	5	340
ACVR1	1.76876	1.25355	2.49573	0.00116894	1.56337	1.07659	2.27027	0.0188905	0.559831	0.428571	0.721698	345	116	229
ACVR1B	0.865814	0.615999	1.21694	0.406791	0.695167	0.474375	1.01872	0.062206	0.519542	0.503759	0.575472	345	189	156
ACVR1C	1.58587	1.02582	2.45168	0.0380177	2.00135	1.24453	3.21841	0.00420356	0.535892	0.81203	0.29717	345	257	88
ACVR2A	1.56772	1.10464	2.22491	0.0118317	1.67053	1.13244	2.46431	0.00968205	0.544368	0.383459	0.731132	345	108	237
ACVR2B	1.33208	0.92073	1.92722	0.128087	1.54319	1.03983	2.29022	0.0312502	0.524259	0.691729	0.382075	345	223	122
ACVRL1	1.34731	0.955829	1.89912	0.0887492	0.976542	0.664145	1.43588	0.903944	0.541956	0.556391	0.556604	345	168	177
ACY1	0.862468	0.604009	1.23152	0.415585	1.01138	0.666344	1.53506	0.957626	0.510711	0.360902	0.698113	345	234	111
ACY3	1.44673	0.731533	2.86115	0.288484	1.41206	0.697221	2.85978	0.337906	0.484537	0.932331	0.0990566	345	315	30
ACYP1	0.74057	0.514572	1.06582	0.105925	0.775008	0.524282	1.14564	0.201194	0.542772	0.684211	0.424528	345	133	212
ACYP2	0.998693	0.680604	1.46544	0.994666	0.93334	0.60435	1.44142	0.755722	0.498794	0.736842	0.301887	345	100	245
ADA	0.832355	0.59219	1.16992	0.290765	0.871524	0.598022	1.27011	0.47422	0.529118	0.503759	0.589623	345	192	153
ADAD1	0.882639	0.475348	1.63891	0.692574	1.07664	0.564458	2.05355	0.822659	0.492907	0.924812	0.0943396	345	31	314
ADAD2	0.817803	0.579268	1.15456	0.252987	0.722798	0.493308	1.05905	0.0957924	0.489857	0.43609	0.603774	345	204	141
ADAL	1.61949	1.15172	2.27725	0.00556782	1.59734	1.12225	2.27354	0.00931265	0.558483	0.526316	0.627358	345	149	196
ADAM10	0.732856	0.520217	1.03241	0.0754797	0.887763	0.620194	1.27077	0.515335	0.533764	0.526316	0.570755	345	185	160
ADAM11	1.60705	0.997429	2.58927	0.0512493	1.43518	0.874062	2.35652	0.153304	0.562012	0.849624	0.29717	345	262	83
ADAM12	1.53444	1.09002	2.16007	0.0141288	1.46953	1.01158	2.13479	0.0433403	0.550681	0.488722	0.632075	345	143	202
ADAM15	0.67864	0.472118	0.975501	0.0362651	0.664348	0.448273	0.984573	0.0416079	0.539651	0.676692	0.419811	345	133	212
ADAM17	1.20257	0.85264	1.69611	0.293101	0.994612	0.693136	1.42722	0.97661	0.500958	0.56391	0.5	345	181	164
ADAM18									0.479465	0	1	345	345	0
ADAM19	1.03516	0.736238	1.45545	0.842447	0.841809	0.578199	1.2256	0.368914	0.465385	0.481203	0.537736	345	184	161
ADAM2	0.855782	0.448604	1.63254	0.636497	0.965223	0.493937	1.88618	0.917523	0.505373	0.932331	0.0849057	345	28	317
ADAM20	1.25326	0.816293	1.92415	0.302061	1.03858	0.659465	1.63563	0.870248	0.529384	0.804511	0.264151	345	263	82
ADAM21	1.66446	1.17106	2.36575	0.00450833	1.40219	0.965193	2.03705	0.0760564	0.58315	0.37594	0.773585	345	98	247
ADAM21P1	1.15117	0.814667	1.62666	0.42486	1.268	0.87909	1.82895	0.203928	0.543003	0.586466	0.504717	345	183	162
ADAM22	0.956691	0.680079	1.34581	0.799283	0.975004	0.668566	1.4219	0.895383	0.484076	0.541353	0.485849	345	165	180
ADAM23	1.43426	1.00803	2.04071	0.045023	1.23863	0.82429	1.86125	0.303021	0.550043	0.368421	0.721698	345	108	237
ADAM28	1.58671	1.11322	2.26159	0.0106766	1.61215	1.08222	2.40159	0.0188486	0.545219	0.360902	0.768868	345	97	248
ADAM29	1.13456	0.758143	1.69788	0.539349	1.031	0.66606	1.59589	0.891069	0.479855	0.774436	0.254717	345	85	260
ADAM30	0.97958	0.624606	1.53629	0.928399	1.02029	0.635225	1.63876	0.933799	0.48913	0.834586	0.188679	345	63	282
ADAM32	1.25451	0.892021	1.76431	0.192499	1.14407	0.793807	1.64889	0.470461	0.537417	0.533835	0.570755	345	162	183
ADAM33	1.80263	1.24261	2.61505	0.00190728	1.40225	0.924925	2.1259	0.1113	0.575401	0.699248	0.443396	345	211	134
ADAM3A	0.9251	0.469643	1.82226	0.821915	0.857	0.425843	1.72469	0.665398	0.491133	0.93985	0.0660377	345	23	322
ADAM5P	0.692101	0.389723	1.22909	0.209117	0.687187	0.374416	1.26124	0.225952	0.490602	0.909774	0.127358	345	40	305
ADAM6	1.52155	1.01763	2.275	0.0408447	1.57962	1.04068	2.39767	0.0317744	0.511243	0.766917	0.339623	345	242	103
ADAM7									0.478898	0	1	345	345	0
ADAM8	0.950968	0.676298	1.33719	0.772507	0.984559	0.689555	1.40577	0.931756	0.483047	0.526316	0.514151	345	173	172
ADAM9	1.77779	0.829589	3.80978	0.138993	1.89781	0.871515	4.13268	0.106612	0.521492	0.947368	0.117925	345	313	32
ADAMDEC1	1.22087	0.868434	1.71634	0.250849	1.21991	0.842374	1.76664	0.292762	0.510746	0.488722	0.59434	345	151	194
ADAMTS1	1.74756	1.21467	2.51423	0.00263114	1.3321	0.893731	1.98548	0.159065	0.595865	0.676692	0.509434	345	194	151
ADAMTS10	1.58422	1.12613	2.22866	0.00823998	1.35332	0.922941	1.9844	0.121301	0.571748	0.466165	0.683962	345	129	216
ADAMTS12	1.6015	1.11943	2.29115	0.00995337	1.51761	1.04533	2.20327	0.0283066	0.562136	0.654135	0.476415	345	198	147
ADAMTS13	1.19431	0.837914	1.7023	0.326099	1.33318	0.91153	1.94986	0.138224	0.519435	0.639098	0.45283	345	201	144
ADAMTS14	0.949792	0.675444	1.33557	0.767085	0.84481	0.592357	1.20485	0.351812	0.468684	0.526316	0.504717	345	171	174
ADAMTS15	1.36198	0.928372	1.9981	0.114133	1.13597	0.753023	1.71367	0.543355	0.551355	0.729323	0.372642	345	230	115
ADAMTS16	1.72622	1.15428	2.58157	0.00784452	1.57482	1.03038	2.40695	0.0358858	0.574957	0.766917	0.367925	345	236	109
ADAMTS17	1.49811	1.03645	2.16542	0.0315232	1.65874	1.08537	2.53499	0.0193587	0.547099	0.691729	0.419811	345	215	130
ADAMTS18	2.14306	1.51469	3.03212	1.66971e-05	1.66423	1.1134	2.48758	0.013	0.594677	0.421053	0.778302	345	103	242
ADAMTS19	1.54709	1.08814	2.19963	0.0150825	1.27629	0.870256	1.87178	0.211783	0.579125	0.616541	0.551887	345	177	168
ADAMTS2	1.75527	1.16511	2.64436	0.00712712	1.54812	0.997885	2.40176	0.0511149	0.561143	0.774436	0.349057	345	241	104
ADAMTS20	0.616396	0.196101	1.93749	0.407629	0.477955	0.148765	1.53558	0.215085	0.478011	0.984962	0.0330189	345	10	335
ADAMTS3	1.5517	1.10412	2.18071	0.0113915	1.13509	0.782364	1.64685	0.504543	0.589499	0.488722	0.674528	345	134	211
ADAMTS4	1.45665	1.00221	2.11717	0.0486651	1.17764	0.793102	1.74862	0.417545	0.57118	0.706767	0.443396	345	212	133
ADAMTS5	1.71477	1.14378	2.57079	0.00904879	1.41269	0.909077	2.19531	0.124506	0.560505	0.766917	0.367925	345	236	109
ADAMTS6	1.83216	1.25986	2.66442	0.00153002	1.46034	0.959889	2.22172	0.0769361	0.57423	0.706767	0.438679	345	213	132
ADAMTS7	1.65107	1.14674	2.3772	0.00701376	1.4995	1.01967	2.20513	0.0394971	0.57994	0.669173	0.504717	345	194	151
ADAMTS8	1.49512	1.06343	2.10204	0.0206812	1.32063	0.900602	1.93655	0.154465	0.555894	0.481203	0.665094	345	135	210
ADAMTS9	1.42762	1.01255	2.01284	0.0422417	1.12136	0.772718	1.62731	0.546592	0.57799	0.56391	0.599057	345	160	185
ADAMTSL1	2.17294	1.36328	3.46347	0.00110306	1.85233	1.11965	3.06447	0.016397	0.586289	0.842105	0.334906	345	253	92
ADAMTSL2	1.42432	1.01219	2.00426	0.0424073	1.18848	0.805544	1.75345	0.384183	0.555575	0.541353	0.584906	345	160	185
ADAMTSL3	1.7009	1.20353	2.40382	0.0026154	1.40414	0.934411	2.11001	0.102366	0.57423	0.413534	0.740566	345	110	235
ADAMTSL4	1.29513	0.890697	1.8832	0.175752	1.16288	0.782339	1.72851	0.45557	0.531707	0.706767	0.396226	345	222	123
ADAMTSL5	0.768036	0.526772	1.1198	0.170119	0.726737	0.475805	1.11001	0.13967	0.502163	0.721805	0.349057	345	112	233
ADAP1	1.053	0.748774	1.48082	0.766583	1.14946	0.795641	1.66061	0.458048	0.491027	0.496241	0.551887	345	161	184
ADAP2	1.39454	0.990207	1.96397	0.0569583	1.4111	0.972747	2.04698	0.0696192	0.557526	0.556391	0.566038	345	166	179
ADAR	1.08841	0.773826	1.53087	0.626441	1.20502	0.843031	1.72244	0.306228	0.517236	0.518797	0.542453	345	166	179
ADARB1	1.70725	1.21186	2.40514	0.00222201	1.66181	1.11095	2.48582	0.0134336	0.571109	0.458647	0.688679	345	127	218
ADARB2	1.39649	0.933972	2.08805	0.103706	1.20072	0.784602	1.83753	0.399459	0.514647	0.766917	0.325472	345	245	100
ADAT1	1.39393	0.936361	2.0751	0.101827	1.34396	0.88337	2.0447	0.167357	0.522556	0.759398	0.353774	345	238	107
ADAT2	0.749095	0.530706	1.05735	0.10042	0.778365	0.539307	1.12339	0.180753	0.54607	0.428571	0.70283	345	226	119
ADAT3	0.624451	0.443644	0.878948	0.00693936	0.629271	0.433823	0.912774	0.0146499	0.577458	0.556391	0.589623	345	185	160
ADC	1.47318	1.01303	2.14235	0.0425907	1.50241	0.986227	2.28875	0.0580407	0.56203	0.293233	0.825472	345	76	269
ADCK1	0.567067	0.27723	1.15992	0.120266	0.443497	0.197753	0.994624	0.0484903	0.485494	0.947368	0.122642	345	34	311
ADCK2	0.630611	0.447271	0.889104	0.00852378	0.775881	0.528673	1.13869	0.194825	0.553341	0.571429	0.575472	345	180	165
ADCK4	0.762024	0.538236	1.07886	0.125505	0.814207	0.558663	1.18664	0.284836	0.511597	0.609023	0.457547	345	150	195
ADCK5	0.675382	0.471336	0.967763	0.0324753	0.7358	0.505731	1.07053	0.108781	0.555362	0.669173	0.490566	345	149	196
ADCY1	2.52183	1.17748	5.40107	0.0172941	1.7564	0.772424	3.99385	0.178987	0.526138	0.947368	0.136792	345	309	36
ADCY10	1.7114	1.02779	2.8497	0.0388932	1.42785	0.823192	2.47663	0.204963	0.560966	0.87218	0.25	345	275	70
ADCY2	1.36178	0.969164	1.91345	0.0751628	1.14333	0.773509	1.68998	0.501684	0.561143	0.488722	0.622642	345	145	200
ADCY3	0.758032	0.537547	1.06895	0.114167	0.769182	0.530834	1.11455	0.16549	0.500851	0.443609	0.646226	345	212	133
ADCY4	1.42921	1.01656	2.00936	0.039931	1.07214	0.725035	1.58543	0.727082	0.568237	0.473684	0.65566	345	136	209
ADCY5	1.75468	1.23921	2.48458	0.00153209	1.48437	0.999715	2.20399	0.0501652	0.577742	0.601504	0.566038	345	172	173
ADCY6	1.18496	0.835505	1.68057	0.341145	1.11549	0.764859	1.62687	0.570257	0.508725	0.609023	0.490566	345	189	156
ADCY7	1.96979	1.16795	3.32211	0.0110177	1.85352	1.07009	3.21051	0.0276905	0.553589	0.879699	0.25	345	276	69
ADCY8	0.894959	0.582747	1.37444	0.61216	1.03193	0.655505	1.62452	0.892009	0.501064	0.81203	0.221698	345	73	272
ADCY9	1.45756	1.02276	2.07722	0.0371187	1.52155	1.03028	2.24709	0.0348669	0.543871	0.360902	0.759434	345	99	246
ADCYAP1	1.79763	1.20201	2.68839	0.00429042	1.47658	0.95504	2.28292	0.0795948	0.583168	0.766917	0.40566	345	228	117
ADCYAP1R1	1.52876	1.07443	2.17521	0.0183259	1.49076	0.989346	2.24631	0.056293	0.570063	0.368421	0.768868	345	98	247
ADD1	1.63126	1.14756	2.31883	0.0063914	1.71557	1.14695	2.5661	0.00860516	0.556675	0.37594	0.754717	345	102	243
ADD2	1.65647	1.1768	2.33165	0.00381288	1.49235	1.01141	2.20197	0.0436823	0.574355	0.541353	0.599057	345	157	188
ADD3	0.695622	0.431897	1.12038	0.13556	0.857658	0.521976	1.40921	0.544483	0.535147	0.857143	0.259434	345	75	270
ADH1A	1.32272	0.929274	1.88273	0.120486	1.51355	1.02897	2.22634	0.0352918	0.535821	0.368421	0.731132	345	106	239
ADH1B	1.80007	1.27106	2.54925	0.000929859	1.7736	1.19125	2.64063	0.00477626	0.586608	0.601504	0.551887	345	175	170
ADH1C	1.00105	0.710238	1.41094	0.99522	0.967207	0.663545	1.40983	0.862313	0.505196	0.443609	0.59434	345	201	144
ADH4	1.64287	1.12248	2.40453	0.0106352	1.6124	1.07856	2.41044	0.0198792	0.548748	0.278195	0.839623	345	71	274
ADH5	1.86748	1.28829	2.70705	0.000976493	2.58427	1.70686	3.91271	7.24548e-06	0.536246	0.300752	0.834906	345	75	270
ADH6	0.855011	0.573264	1.27523	0.442503	0.935922	0.607996	1.44072	0.763496	0.501738	0.24812	0.801887	345	271	74
ADH7	1.05162	0.38812	2.84942	0.921157	1.33584	0.434897	4.10323	0.613047	0.481221	0.977444	0.0424528	345	13	332
ADHFE1	1.53138	1.07168	2.18826	0.0192775	1.39718	0.902398	2.16325	0.13374	0.57994	0.360902	0.787736	345	93	252
ADI1	0.86567	0.601338	1.2462	0.43776	1.03952	0.704417	1.53403	0.84523	0.554689	0.684211	0.433962	345	135	210
ADIG									0.479252	0	1	345	345	0
ADIPOQ	1.60314	1.10283	2.33041	0.0134052	1.44923	0.919797	2.2834	0.109699	0.555841	0.293233	0.816038	345	78	267
ADIPOR1	0.693119	0.48367	0.993267	0.0458506	0.745902	0.502092	1.1081	0.146595	0.558732	0.669173	0.466981	345	144	201
ADIPOR2	0.898054	0.630363	1.27942	0.551549	0.908802	0.62118	1.3296	0.622311	0.529437	0.406015	0.683962	345	225	120
ADK	0.778725	0.537364	1.1285	0.1864	0.745679	0.504707	1.1017	0.140588	0.508831	0.308271	0.764151	345	255	90
ADM	1.40046	0.971412	2.019	0.0711436	1.24945	0.83481	1.87002	0.27907	0.532522	0.315789	0.79717	345	85	260
ADM2	0.734158	0.521853	1.03283	0.0759878	0.547771	0.378976	0.791746	0.00136306	0.513513	0.511278	0.556604	345	184	161
ADNP	1.16836	0.822916	1.65883	0.384239	1.23165	0.827701	1.83275	0.304209	0.498865	0.383459	0.679245	345	119	226
ADNP2	0.578187	0.365619	0.914339	0.0191321	0.715429	0.439735	1.16397	0.177491	0.54107	0.842105	0.301887	345	86	259
ADO	0.734862	0.474961	1.13698	0.166523	0.892495	0.563985	1.41236	0.627209	0.525252	0.819549	0.245283	345	77	268
ADORA1	1.17038	0.83013	1.65009	0.369353	1.21936	0.842941	1.76387	0.29239	0.495992	0.496241	0.54717	345	162	183
ADORA2A	1.75574	1.06748	2.88775	0.0266109	1.61711	0.950158	2.75222	0.0764738	0.542063	0.864662	0.264151	345	271	74
ADORA2B	0.524075	0.282304	0.972904	0.040659	0.481671	0.251692	0.92179	0.0273923	0.506136	0.924812	0.136792	345	40	305
ADORA3	1.35506	0.96302	1.90669	0.0812081	1.52368	1.05017	2.2107	0.0265706	0.554298	0.518797	0.599057	345	154	191
ADPGK	0.765943	0.539677	1.08707	0.135539	0.71078	0.488645	1.0339	0.0741617	0.508476	0.616541	0.457547	345	149	196
ADPRH	2.07294	1.41211	3.043	0.000197742	1.6702	1.05971	2.63238	0.0271177	0.595794	0.729323	0.471698	345	209	136
ADPRHL1	0.693587	0.483205	0.995568	0.0472501	0.691121	0.468955	1.01854	0.0618819	0.535537	0.676692	0.45283	345	140	205
ADPRHL2	0.770951	0.521791	1.13909	0.191519	1.04472	0.675773	1.6151	0.843959	0.520499	0.75188	0.330189	345	104	241
ADRA1A	1.56815	1.10237	2.23074	0.0123508	1.45079	0.969622	2.17072	0.0703093	0.549422	0.62406	0.504717	345	188	157
ADRA1B	1.66844	1.18651	2.34612	0.00324766	1.47441	1.01957	2.13217	0.0391181	0.581004	0.496241	0.665094	345	137	208
ADRA1D	1.73558	1.23474	2.43959	0.00150479	1.52005	1.03851	2.22487	0.0312094	0.600138	0.503759	0.698113	345	131	214
ADRA2A	1.21133	0.860291	1.7056	0.272179	1.16983	0.804323	1.70143	0.411832	0.520287	0.548872	0.533019	345	172	173
ADRA2B	1.24436	0.882289	1.755	0.212719	1.27268	0.879537	1.84154	0.200874	0.550255	0.451128	0.679245	345	128	217
ADRA2C	0.729514	0.517785	1.02782	0.0713776	0.498947	0.338449	0.735556	0.000446588	0.523177	0.571429	0.533019	345	171	174
ADRB1	1.0669	0.754211	1.50922	0.714416	0.980923	0.673278	1.42914	0.920097	0.499894	0.593985	0.462264	345	193	152
ADRB2	1.6694	1.16774	2.38657	0.0049482	1.56514	1.06461	2.301	0.0227039	0.567669	0.646617	0.504717	345	191	154
ADRB3	2.06546	1.43722	2.96832	8.8438e-05	1.9966	1.33039	2.99643	0.000843314	0.565187	0.330827	0.834906	345	79	266
ADRBK1	1.28387	0.880118	1.87285	0.194597	1.08882	0.726884	1.63098	0.679789	0.509576	0.285714	0.783019	345	84	261
ADRBK2	1.5961	1.01721	2.50443	0.0419317	1.35125	0.818411	2.23102	0.239324	0.523869	0.827068	0.25	345	269	76
ADRM1	0.706064	0.489599	1.01824	0.0624307	0.583403	0.386103	0.881524	0.0105053	0.520038	0.323308	0.778302	345	256	89
ADSL	1.72427	1.1464	2.59342	0.00889587	1.47494	0.944303	2.30375	0.0876216	0.522734	0.225564	0.867925	345	58	287
ADSS	0.866443	0.578614	1.29745	0.486488	1.01382	0.655182	1.56878	0.950853	0.487693	0.240602	0.79717	345	271	74
ADSSL1	0.690607	0.436992	1.09141	0.112885	0.523459	0.323389	0.847308	0.00843192	0.534615	0.842105	0.254717	345	76	269
AEBP1	1.71021	1.17451	2.49025	0.00512692	1.64021	1.0968	2.45285	0.0159537	0.571429	0.293233	0.84434	345	72	273
AEBP2	0.941924	0.66472	1.33473	0.736546	0.993347	0.682153	1.44651	0.97223	0.517201	0.413534	0.660377	345	219	126
AEN	0.581373	0.361044	0.936157	0.0256555	0.521154	0.299954	0.905479	0.020764	0.529437	0.857143	0.221698	345	67	278
AES	0.777992	0.552908	1.09471	0.149675	0.801706	0.541106	1.18781	0.270513	0.544191	0.548872	0.54717	345	177	168
AFAP1	1.68428	1.16165	2.44204	0.00595013	1.6874	1.08798	2.61707	0.0194618	0.562562	0.300752	0.839623	345	74	271
AFAP1L1	1.88186	1.27714	2.7729	0.00138941	1.48257	0.957454	2.29568	0.077551	0.602426	0.736842	0.448113	345	215	130
AFAP1L2	1.16401	0.827435	1.63749	0.383128	1.18513	0.81195	1.72982	0.378696	0.53465	0.488722	0.603774	345	149	196
AFARP1	1.22167	0.778272	1.91768	0.384129	1.20031	0.738279	1.95149	0.461552	0.494255	0.172932	0.872642	345	50	295
AFF1	1.67095	1.18135	2.36346	0.00370773	1.73921	1.21107	2.49767	0.00272642	0.571712	0.593985	0.603774	345	163	182
AFF2	2.2459	1.50583	3.34969	7.28039e-05	1.824	1.17968	2.82026	0.00686894	0.601433	0.759398	0.443396	345	219	126
AFF3	1.68848	1.19263	2.39048	0.00314634	1.45857	0.982258	2.16584	0.0613145	0.563697	0.601504	0.566038	345	172	173
AFF4	1.56574	1.08218	2.26537	0.0173573	1.49598	1.01299	2.20927	0.042883	0.583806	0.691729	0.495283	345	199	146
AFG3L1	1.27943	0.906504	1.80576	0.161028	1.08979	0.748422	1.58685	0.653817	0.535395	0.571429	0.514151	345	179	166
AFG3L2	0.722969	0.464072	1.1263	0.151534	0.93754	0.568303	1.54668	0.800645	0.532983	0.827068	0.273585	345	82	263
AFM									0.483455	0	1	345	345	0
AFMID	0.767024	0.541817	1.08584	0.134757	0.873015	0.607174	1.25525	0.463576	0.54646	0.421053	0.688679	345	224	121
AFP									0.468222	0	1	345	345	0
AFTPH	0.694307	0.485907	0.992087	0.0451139	0.667736	0.45777	0.974009	0.0360214	0.544439	0.368421	0.792453	345	253	92
AG2	1.65942	1.13103	2.43466	0.00961174	1.2912	0.845501	1.97183	0.236781	0.576607	0.729323	0.443396	345	215	130
AGA	0.858583	0.608785	1.21088	0.384748	0.726076	0.499351	1.05574	0.0937483	0.490318	0.56391	0.5	345	165	180
AGAP1	0.586999	0.404021	0.852848	0.00518816	0.628936	0.424477	0.931877	0.0207952	0.534508	0.308271	0.792453	345	261	84
AGAP11	0.938081	0.667478	1.31839	0.712794	0.75633	0.518103	1.10409	0.14792	0.466804	0.496241	0.537736	345	182	163
AGAP2	1.24733	0.887274	1.75349	0.203469	1.32376	0.900155	1.9467	0.154045	0.512626	0.481203	0.59434	345	150	195
AGAP3	0.962564	0.670516	1.38182	0.836138	0.900791	0.610405	1.32932	0.598732	0.498936	0.669173	0.377358	345	221	124
AGAP4	1.20787	0.857686	1.70104	0.279631	1.06533	0.723738	1.56815	0.748342	0.500319	0.503759	0.54717	345	163	182
AGAP5	0.828142	0.562685	1.21883	0.338901	0.599462	0.393514	0.913194	0.0171814	0.495815	0.270677	0.783019	345	264	81
AGAP6	1.2684	0.89363	1.80033	0.183331	1.01711	0.68545	1.50926	0.93284	0.519719	0.390977	0.716981	345	112	233
AGAP7	1.37342	0.96885	1.94692	0.0747135	1.34425	0.928716	1.94572	0.116881	0.537541	0.390977	0.740566	345	107	238
AGAP8	1.55956	1.06979	2.27356	0.0208468	1.66991	1.11279	2.50598	0.0132869	0.539545	0.285714	0.825472	345	75	270
AGBL1	0.931157	0.543473	1.59539	0.795147	0.990586	0.56594	1.73386	0.973583	0.487569	0.894737	0.113208	345	39	306
AGBL2	0.57357	0.356196	0.923599	0.0221991	0.608855	0.372389	0.995477	0.0479244	0.540236	0.857143	0.29717	345	83	262
AGBL3	1.38748	0.954642	2.01656	0.0860444	1.47574	0.987546	2.20529	0.0575889	0.532948	0.293233	0.79717	345	82	263
AGBL4	1.34336	0.948762	1.90207	0.0962048	1.30299	0.889358	1.90899	0.174395	0.557916	0.601504	0.518868	345	182	163
AGBL5	0.484332	0.24585	0.954149	0.0361146	0.505824	0.253444	1.00953	0.0532276	0.506845	0.93985	0.127358	345	36	309
AGER	0.598259	0.378151	0.946483	0.0281662	0.411524	0.248229	0.682242	0.000576426	0.526032	0.172932	0.900943	345	302	43
AGFG1	1.30184	0.923887	1.8344	0.131678	1.26448	0.871535	1.8346	0.216519	0.49241	0.526316	0.528302	345	170	175
AGFG2	1.14345	0.813451	1.60731	0.44038	1.34438	0.93017	1.94304	0.115311	0.498652	0.488722	0.584906	345	153	192
AGGF1	1.60274	1.08788	2.36126	0.0170319	1.94904	1.27581	2.97752	0.00202477	0.529047	0.263158	0.830189	345	71	274
AGK	1.36516	0.882263	2.11236	0.162249	1.19951	0.760493	1.89196	0.433978	0.503688	0.81203	0.254717	345	266	79
AGL	0.581691	0.327821	1.03216	0.0640594	0.674421	0.36179	1.2572	0.215111	0.510019	0.909774	0.174528	345	50	295
AGMAT	0.531951	0.343674	0.823372	0.00462714	0.584314	0.369832	0.923183	0.021309	0.571464	0.819549	0.334906	345	96	249
AGPAT1	1.51318	1.05347	2.17349	0.0249686	1.43147	0.963638	2.12641	0.0756472	0.573521	0.669173	0.476415	345	200	145
AGPAT2	0.650058	0.446014	0.94745	0.0250379	0.644027	0.430706	0.963001	0.0320625	0.541921	0.721805	0.382075	345	119	226
AGPAT3	0.60495	0.385631	0.949001	0.0286828	0.811982	0.503235	1.31015	0.393516	0.558874	0.834586	0.306604	345	88	257
AGPAT4	1.54325	1.08466	2.19573	0.0158799	1.55963	1.06036	2.29399	0.0239662	0.573273	0.37594	0.773585	345	98	247
AGPAT5	1.27713	0.891603	1.82935	0.182145	1.61587	1.10423	2.36459	0.013498	0.483189	0.654135	0.410377	345	212	133
AGPAT6	0.689143	0.484336	0.980554	0.0385366	0.789867	0.54056	1.15416	0.222824	0.529827	0.639098	0.481132	345	151	194
AGPAT9	1.61377	0.955704	2.72496	0.0733802	1.25058	0.707967	2.20909	0.44113	0.528869	0.120301	0.943396	345	28	317
AGPHD1	1.42651	0.975912	2.08515	0.0666429	1.75847	1.18213	2.61579	0.00534028	0.515499	0.721805	0.367925	345	230	115
AGPS	1.37818	0.978908	1.94031	0.0660879	1.44285	1.00736	2.06662	0.0455053	0.517875	0.451128	0.627358	345	139	206
AGR2	0.898653	0.638365	1.26507	0.540264	0.804053	0.55857	1.15742	0.240637	0.531955	0.458647	0.613208	345	203	142
AGR3	0.754496	0.536665	1.06075	0.105084	0.713478	0.492181	1.03428	0.0747395	0.543481	0.518797	0.613208	345	195	150
AGRN	1.17854	0.831578	1.67027	0.355829	1.09312	0.75091	1.59127	0.642139	0.512626	0.398496	0.674528	345	122	223
AGRP	1.48642	1.05684	2.09061	0.0227468	1.57758	1.0963	2.27013	0.0140845	0.515924	0.503759	0.59434	345	153	192
AGT	1.60041	1.13055	2.26556	0.00800382	1.375	0.946478	1.99754	0.0946671	0.540467	0.428571	0.669811	345	127	218
AGTPBP1	1.22659	0.869917	1.72951	0.244004	1.15855	0.809967	1.65715	0.420318	0.521457	0.43609	0.650943	345	132	213
AGTR1	1.56245	1.11056	2.19821	0.0104069	1.4142	0.9665	2.06927	0.0743411	0.583274	0.541353	0.613208	345	154	191
AGTR2	1.67221	1.18945	2.3509	0.00309486	1.66501	1.14165	2.4283	0.00809682	0.586803	0.511278	0.665094	345	139	206
AGTRAP	1.36072	0.967364	1.91403	0.0768338	1.41722	0.985731	2.03758	0.0597841	0.534863	0.511278	0.580189	345	157	188
AGXT	0.881894	0.615405	1.26378	0.49356	0.89085	0.605611	1.31043	0.557227	0.490779	0.669173	0.386792	345	127	218
AGXT2	0.877193	0.503481	1.5283	0.643673	0.870543	0.488176	1.5524	0.638531	0.469606	0.902256	0.141509	345	44	301
AGXT2L1	0.866177	0.530714	1.41368	0.565419	0.74797	0.445228	1.25657	0.272588	0.476238	0.864662	0.146226	345	50	295
AGXT2L2	1.80123	0.994514	3.26234	0.0521599	1.56501	0.826962	2.96175	0.168764	0.536885	0.909774	0.179245	345	295	50
AHCTF1	1.47463	1.04155	2.0878	0.0285641	1.54978	1.06378	2.25782	0.0224897	0.543233	0.398496	0.726415	345	111	234
AHCY	1.4902	0.9801	2.26579	0.0620495	1.47137	0.946531	2.28724	0.0861949	0.506526	0.210526	0.882075	345	53	292
AHCYL1	0.720292	0.469114	1.10596	0.133707	0.737494	0.469212	1.15917	0.186914	0.511526	0.81203	0.259434	345	81	264
AHCYL2	0.533375	0.372631	0.76346	0.00059266	0.652485	0.437388	0.973361	0.0364139	0.545361	0.360902	0.79717	345	255	90
AHDC1	1.42774	1.0124	2.01348	0.042335	1.36088	0.93592	1.9788	0.106692	0.549936	0.56391	0.566038	345	167	178
AHI1	1.20267	0.834025	1.73426	0.323075	1.04672	0.691819	1.58368	0.828894	0.488474	0.684211	0.358491	345	227	118
AHNAK	1.61682	1.04578	2.49966	0.0306683	1.54399	0.98255	2.42625	0.0596159	0.568627	0.81203	0.306604	345	255	90
AHNAK2	1.70694	1.18618	2.4563	0.00398394	1.51655	1.01036	2.27635	0.0444608	0.548801	0.669173	0.466981	345	202	143
AHR	1.37189	0.969275	1.94175	0.0744401	1.17671	0.819177	1.69028	0.378543	0.515179	0.406015	0.698113	345	118	227
AHRR	0.715585	0.471331	1.08642	0.116206	0.59644	0.379943	0.936301	0.0247026	0.525465	0.218045	0.84434	345	284	61
AHSA1	0.761392	0.537286	1.07898	0.12537	0.826472	0.563181	1.21285	0.330114	0.557419	0.616541	0.5	345	158	187
AHSA2	0.843311	0.587083	1.21137	0.35639	0.64857	0.432625	0.972304	0.036089	0.51713	0.338346	0.721698	345	242	103
AHSG	1.51584	1.07469	2.13807	0.0177664	1.66114	1.12001	2.46372	0.0116182	0.547631	0.548872	0.54717	345	169	176
AHSP									0.492268	0.503759	0.523585	345	345	0
AICDA	0.69239	0.425869	1.12571	0.138223	0.63861	0.382518	1.06615	0.0863448	0.530075	0.864662	0.226415	345	67	278
AIDA	2.54081	1.65083	3.91058	2.25063e-05	2.9222	1.76761	4.83097	2.90441e-05	0.55632	0.195489	0.938679	345	39	306
AIF1	1.39651	0.954869	2.04243	0.0850928	1.33019	0.879467	2.01192	0.176517	0.530926	0.721805	0.386792	345	226	119
AIF1L	0.695228	0.446221	1.08319	0.108108	0.681876	0.429301	1.08305	0.104801	0.486487	0.827068	0.245283	345	76	269
AIFM1	0.658831	0.405256	1.07107	0.0923669	0.746898	0.442964	1.25937	0.273602	0.556604	0.864662	0.240566	345	70	275
AIFM2	0.528283	0.32682	0.853935	0.00920327	0.655415	0.391221	1.09802	0.108543	0.532345	0.857143	0.231132	345	69	276
AIFM3	1.0559	0.747383	1.49176	0.757712	0.849192	0.563356	1.28006	0.434956	0.483242	0.586466	0.466981	345	191	154
AIG1	1.04353	0.740013	1.47154	0.808008	1.04368	0.723268	1.50602	0.81928	0.472939	0.571429	0.481132	345	160	185
AIM1	0.553543	0.343912	0.890953	0.0148737	0.542054	0.328016	0.895756	0.0168704	0.516066	0.157895	0.943396	345	313	32
AIM1L	0.540143	0.335437	0.869774	0.0112777	0.564839	0.335547	0.950813	0.0315718	0.546354	0.857143	0.259434	345	75	270
AIM2	0.700854	0.470392	1.04423	0.0805973	0.750176	0.490324	1.14774	0.185215	0.511668	0.766917	0.311321	345	98	247
AIMP1	0.83185	0.570719	1.21246	0.338192	0.887998	0.592959	1.32984	0.564277	0.539899	0.721805	0.367925	345	116	229
AIMP2	0.657961	0.46738	0.926252	0.0164401	0.726722	0.499655	1.05698	0.0949115	0.562598	0.458647	0.712264	345	224	121
AIP	1.40239	0.937814	2.09712	0.0995097	1.17329	0.762977	1.80425	0.466705	0.537204	0.233083	0.853774	345	62	283
AIPL1	0.827082	0.582037	1.17529	0.289597	1.03754	0.713999	1.5077	0.846738	0.521404	0.631579	0.438679	345	143	202
AIRE	1.66347	1.18316	2.33876	0.00341738	1.60509	1.11081	2.31932	0.0117513	0.558572	0.496241	0.646226	345	141	204
AJAP1	1.41045	0.892358	2.22933	0.14092	1.48788	0.923299	2.3977	0.102644	0.506987	0.834586	0.245283	345	271	74
AK1	0.501184	0.337913	0.743344	0.000593218	0.512374	0.336899	0.779247	0.00177228	0.570294	0.759398	0.410377	345	120	225
AK2	0.709141	0.491469	1.02322	0.0661718	0.701708	0.471445	1.04444	0.0808618	0.557739	0.323308	0.792453	345	259	86
AK3	0.886898	0.572192	1.37469	0.591424	1.06079	0.666854	1.68744	0.803225	0.507377	0.819549	0.235849	345	75	270
AK3L1	1.86543	1.32029	2.63565	0.000406994	1.94558	1.34666	2.81087	0.000392026	0.584657	0.586466	0.617925	345	159	186
AK5	1.83367	1.24435	2.70208	0.00217588	1.72281	1.13759	2.6091	0.0102078	0.554937	0.736842	0.377358	345	230	115
AK7	0.670523	0.448369	1.00275	0.0515832	0.695151	0.455184	1.06163	0.0923447	0.530394	0.774436	0.34434	345	104	241
AKAP1	0.70976	0.464702	1.08405	0.112627	0.57748	0.367079	0.908478	0.0175412	0.525642	0.804511	0.273585	345	85	260
AKAP10	1.17789	0.807778	1.71757	0.394916	1.09695	0.742107	1.62146	0.642592	0.518939	0.714286	0.363208	345	230	115
AKAP11	1.54921	1.03122	2.32738	0.0350308	1.3896	0.867327	2.22638	0.171281	0.540006	0.774436	0.339623	345	243	102
AKAP12	1.87087	1.31542	2.66085	0.000491361	1.54393	1.03405	2.30523	0.0336985	0.593772	0.62406	0.561321	345	176	169
AKAP13	0.882532	0.626222	1.24375	0.475314	0.810364	0.566419	1.15937	0.249853	0.476415	0.451128	0.59434	345	200	145
AKAP14	0.947762	0.670999	1.33868	0.760744	1.0311	0.713136	1.49085	0.87066	0.49014	0.593985	0.438679	345	148	197
AKAP2	1.81857	1.23092	2.68676	0.00267058	1.34392	0.870124	2.0757	0.182623	0.558022	0.744361	0.396226	345	227	118
AKAP3	0.702369	0.49879	0.989037	0.0430643	0.812459	0.563543	1.17132	0.265823	0.535555	0.556391	0.542453	345	175	170
AKAP4	1.25755	0.891913	1.77308	0.191081	1.19604	0.824151	1.73575	0.346124	0.523195	0.541353	0.533019	345	171	174
AKAP5	0.50667	0.31709	0.809595	0.00446525	0.511893	0.314449	0.833314	0.00707313	0.562704	0.849624	0.287736	345	82	263
AKAP6	1.58569	1.08059	2.32691	0.018471	1.68733	1.09174	2.60785	0.0185184	0.550539	0.270677	0.839623	345	70	275
AKAP7	0.799611	0.52168	1.22561	0.304744	0.920474	0.579988	1.46084	0.725108	0.499042	0.804511	0.240566	345	78	267
AKAP8	0.926123	0.64348	1.33292	0.679521	0.849746	0.58076	1.24332	0.401774	0.482693	0.323308	0.693396	345	108	237
AKAP8L	1.1624	0.826696	1.63443	0.386791	0.893488	0.613694	1.30085	0.556782	0.541531	0.526316	0.589623	345	157	188
AKAP9	1.35683	0.959858	1.91799	0.0839943	1.20944	0.834595	1.75264	0.315051	0.52777	0.413534	0.665094	345	126	219
AKD1	1.88388	1.23443	2.87503	0.00332018	1.87567	1.17702	2.98903	0.00815713	0.53919	0.796992	0.353774	345	243	102
AKIRIN1	1.03128	0.733113	1.45072	0.859583	0.997414	0.70191	1.41733	0.988478	0.500603	0.481203	0.566038	345	156	189
AKIRIN2	1.25513	0.8683	1.81429	0.226753	1.32111	0.904442	1.92974	0.149742	0.510179	0.308271	0.764151	345	91	254
AKNA	0.62235	0.39934	0.969898	0.0361727	0.575008	0.352412	0.938204	0.0267376	0.50383	0.18797	0.877358	345	295	50
AKNAD1	2.1884	1.25425	3.81827	0.0058219	2.22058	1.22445	4.02712	0.00862279	0.506987	0.105263	0.962264	345	22	323
AKR1A1	0.544323	0.349517	0.847703	0.00712415	0.608619	0.37979	0.975322	0.0390349	0.570081	0.827068	0.316038	345	91	254
AKR1B1	1.89098	1.33201	2.68453	0.00036594	2.07991	1.42513	3.03553	0.000146711	0.591644	0.616541	0.556604	345	176	169
AKR1B10	1.44235	0.904337	2.30043	0.1241	1.54328	0.926563	2.57047	0.0955253	0.507093	0.157895	0.896226	345	43	302
AKR1B15	1.48662	1.05713	2.09061	0.0226484	1.56469	1.09136	2.24332	0.0148674	0.52378	0.511278	0.599057	345	153	192
AKR1C1	1.94736	1.02124	3.71335	0.0429928	1.42077	0.708217	2.85022	0.322811	0.493723	0.924812	0.146226	345	304	41
AKR1C2	1.45473	1.01627	2.08235	0.0405455	1.35968	0.913163	2.02454	0.130352	0.528444	0.646617	0.424528	345	208	137
AKR1C3	0.822887	0.531976	1.27288	0.381105	0.802837	0.503	1.28141	0.357284	0.513725	0.819549	0.268868	345	82	263
AKR1C4	1.18828	0.839294	1.68238	0.330848	1.0667	0.73005	1.55858	0.738591	0.472993	0.398496	0.660377	345	125	220
AKR1CL1	0.862911	0.213289	3.49111	0.836196	0.880679	0.212057	3.65749	0.861154	0.4806	0.992481	0.0188679	345	6	339
AKR1D1	1.48544	1.0439	2.11373	0.0278995	1.28766	0.885815	1.87181	0.185274	0.536353	0.37594	0.754717	345	102	243
AKR1E2	2.15747	1.23849	3.75837	0.00662265	1.42716	0.778853	2.61511	0.249688	0.510675	0.894737	0.20283	345	288	57
AKR7A2	0.798729	0.567703	1.12377	0.197018	0.96277	0.661426	1.40141	0.842981	0.556356	0.511278	0.622642	345	198	147
AKR7A3	0.894375	0.629493	1.27072	0.533308	0.8781	0.604468	1.2756	0.49504	0.531281	0.631579	0.448113	345	145	200
AKR7L	0.899507	0.6386	1.26701	0.544551	0.907063	0.625658	1.31504	0.606729	0.510994	0.56391	0.509434	345	167	178
AKT1	1.11432	0.774193	1.60387	0.560197	0.991977	0.675245	1.45727	0.967257	0.509398	0.676692	0.400943	345	217	128
AKT1S1	0.837254	0.587313	1.19356	0.326159	0.923035	0.631468	1.34923	0.679247	0.51862	0.646617	0.419811	345	137	208
AKT2	0.759192	0.523912	1.10013	0.145472	0.906034	0.59755	1.37377	0.642181	0.527734	0.706767	0.372642	345	119	226
AKT3	2.46333	1.46017	4.15566	0.000728215	1.91336	1.08466	3.3752	0.0250534	0.58182	0.879699	0.273585	345	271	74
AKTIP	1.87217	1.31011	2.67536	0.000575333	2.27123	1.5218	3.38974	5.94005e-05	0.546354	0.353383	0.773585	345	95	250
ALAD	0.727773	0.516467	1.02553	0.0693884	0.725157	0.503535	1.04432	0.0841838	0.524542	0.571429	0.528302	345	170	175
ALAS1	0.689267	0.474158	1.00196	0.0512143	0.859287	0.569661	1.29616	0.469627	0.557419	0.300752	0.806604	345	265	80
ALAS2	1.38562	0.937924	2.047	0.101403	1.47714	0.962316	2.26738	0.0743796	0.551568	0.255639	0.834906	345	69	276
ALB	1.60971	1.1328	2.28739	0.00791869	1.55484	1.07601	2.24674	0.0187715	0.60028	0.62406	0.570755	345	174	171
ALCAM	1.34886	0.956605	1.90196	0.0878374	1.45671	1.01151	2.09785	0.0432325	0.510604	0.571429	0.504717	345	181	164
ALDH16A1	0.680033	0.481606	0.960215	0.0284813	0.823817	0.560555	1.21072	0.323848	0.531955	0.578947	0.542453	345	172	173
ALDH18A1	0.583312	0.403437	0.843383	0.00416435	0.73268	0.49737	1.07932	0.115542	0.576784	0.699248	0.462264	345	139	206
ALDH1A1	1.22156	0.779026	1.91549	0.383225	1.0143	0.630495	1.63174	0.953323	0.496418	0.827068	0.235849	345	272	73
ALDH1A2	1.62936	1.1498	2.30894	0.00605511	1.30226	0.885956	1.91417	0.179005	0.574957	0.609023	0.537736	345	179	166
ALDH1A3	1.54837	1.07049	2.23959	0.0202504	1.30824	0.862544	1.98425	0.206153	0.567988	0.308271	0.801887	345	83	262
ALDH1B1	0.731781	0.511805	1.0463	0.0869273	0.623394	0.421574	0.921831	0.0178955	0.520003	0.353383	0.754717	345	247	98
ALDH1L1	1.41974	0.840785	2.39736	0.189799	0.894131	0.508574	1.57199	0.697493	0.534101	0.879699	0.20283	345	286	59
ALDH1L2	1.61574	1.11797	2.33514	0.0106664	1.57315	1.05268	2.35095	0.0270739	0.570506	0.691729	0.45283	345	208	137
ALDH2	0.799968	0.538991	1.18731	0.267958	0.924444	0.610988	1.39871	0.710018	0.500709	0.759398	0.29717	345	96	249
ALDH3A1	0.787103	0.559399	1.10749	0.16945	0.75873	0.52809	1.0901	0.135342	0.527699	0.473684	0.636792	345	206	139
ALDH3A2	0.624617	0.442703	0.881283	0.00737317	0.678809	0.47327	0.973613	0.0352667	0.569584	0.578947	0.584906	345	181	164
ALDH3B1	0.909221	0.646683	1.27834	0.58409	0.802638	0.559338	1.15177	0.232814	0.490637	0.481203	0.580189	345	193	152
ALDH3B2	0.750206	0.527892	1.06614	0.108982	0.667567	0.448354	0.993958	0.0466123	0.532363	0.383459	0.721698	345	236	109
ALDH4A1	0.650403	0.456284	0.927108	0.0173862	0.751595	0.518727	1.089	0.131217	0.537842	0.646617	0.490566	345	152	193
ALDH5A1	0.722455	0.512388	1.01865	0.0636566	0.672597	0.468052	0.966531	0.0320339	0.55898	0.578947	0.542453	345	172	173
ALDH6A1	1.24111	0.874833	1.76074	0.226068	1.5021	1.02518	2.20088	0.0368354	0.517095	0.383459	0.693396	345	116	229
ALDH7A1	3.29936	1.21849	8.93384	0.0188348	3.15373	1.15093	8.64174	0.0255307	0.530926	0.969925	0.113208	345	317	28
ALDH8A1	1.25991	0.862897	1.8396	0.231545	1.35213	0.903383	2.02379	0.142607	0.523638	0.285714	0.806604	345	79	266
ALDH9A1	0.695804	0.492416	0.983199	0.0397809	0.816141	0.562038	1.18513	0.285738	0.539296	0.428571	0.70283	345	226	119
ALDOA	0.662617	0.451332	0.972813	0.0356715	0.684165	0.454941	1.02889	0.068276	0.510214	0.278195	0.825472	345	272	73
ALDOB	0.848647	0.552213	1.30421	0.454135	0.926807	0.593321	1.44774	0.738365	0.505355	0.81203	0.264151	345	82	263
ALDOC	1.4469	0.986327	2.12253	0.0588189	1.27634	0.846279	1.92494	0.24449	0.519116	0.729323	0.353774	345	234	111
ALG1	0.674484	0.47711	0.953508	0.0257815	0.74054	0.518046	1.05859	0.099428	0.564052	0.601504	0.533019	345	167	178
ALG10	0.593448	0.390714	0.901377	0.0144111	0.589662	0.377561	0.920915	0.020224	0.567244	0.796992	0.377358	345	108	237
ALG10B	2.04685	1.38563	3.02362	0.000320146	2.15433	1.39684	3.32258	0.000516887	0.573237	0.744361	0.438679	345	218	127
ALG11	0.595383	0.419006	0.846004	0.00381672	0.525624	0.358603	0.770437	0.000978053	0.587282	0.62406	0.542453	345	166	179
ALG12	1.20665	0.836728	1.7401	0.314585	1.25742	0.852142	1.85544	0.248529	0.522379	0.315789	0.759434	345	93	252
ALG13	0.818195	0.553715	1.209	0.31382	0.762872	0.497545	1.16969	0.214534	0.500213	0.75188	0.330189	345	104	241
ALG14	0.675568	0.461992	0.987879	0.0430875	0.561964	0.376747	0.83824	0.00473033	0.528692	0.285714	0.830189	345	272	73
ALG1L	1.20195	0.826871	1.74717	0.335128	0.830325	0.524444	1.31461	0.427695	0.512183	0.706767	0.358491	345	230	115
ALG1L2	1.06304	0.750106	1.50653	0.731118	0.985979	0.675138	1.43993	0.941747	0.494325	0.609023	0.433962	345	201	144
ALG2	0.694816	0.493127	0.978994	0.037405	0.764576	0.524423	1.1147	0.162875	0.556249	0.571429	0.575472	345	180	165
ALG3	1.0093	0.712317	1.4301	0.958483	1.08791	0.746703	1.58502	0.660814	0.497837	0.398496	0.665094	345	124	221
ALG5	0.789827	0.559672	1.11463	0.179439	0.582846	0.398807	0.851814	0.00529665	0.522769	0.586466	0.509434	345	164	181
ALG6	0.730667	0.506812	1.0534	0.0927143	0.763471	0.515546	1.13062	0.177933	0.557632	0.691729	0.448113	345	137	208
ALG8	1.10884	0.788326	1.55968	0.552808	0.997321	0.68029	1.46209	0.989032	0.496063	0.496241	0.556604	345	160	185
ALG9	0.51852	0.313366	0.857984	0.0105859	0.615538	0.361853	1.04707	0.0734127	0.528515	0.87218	0.235849	345	68	277
ALK	1.55879	1.0999	2.20912	0.0125884	1.8549	1.25908	2.73268	0.00177572	0.569726	0.390977	0.745283	345	106	239
ALKBH1	1.46304	1.0327	2.07272	0.0322726	1.39278	0.96264	2.01512	0.0787595	0.508796	0.601504	0.471698	345	192	153
ALKBH2	0.637926	0.446948	0.910508	0.0132699	0.76725	0.512643	1.14831	0.197821	0.570471	0.654135	0.495283	345	152	193
ALKBH3	1.32756	0.863707	2.04051	0.196394	1.24487	0.772904	2.00503	0.36776	0.50837	0.804511	0.264151	345	263	82
ALKBH4	0.659895	0.455409	0.956199	0.0280451	0.771224	0.522273	1.13884	0.191476	0.546638	0.706767	0.419811	345	129	216
ALKBH5	0.657699	0.46651	0.927242	0.0168013	0.755414	0.523578	1.08991	0.133702	0.517166	0.571429	0.514151	345	167	178
ALKBH6	0.78661	0.558775	1.10734	0.168944	0.670062	0.462911	0.969912	0.033849	0.516137	0.473684	0.622642	345	203	142
ALKBH7	1.22925	0.799985	1.88887	0.346315	1.38145	0.876016	2.1785	0.164409	0.486895	0.804511	0.268868	345	262	83
ALKBH8	0.751802	0.457099	1.23651	0.261122	0.785764	0.472447	1.30687	0.352957	0.50571	0.87218	0.188679	345	58	287
ALLC	1.37102	0.967505	1.94282	0.0760258	1.25266	0.859178	1.82636	0.241601	0.533267	0.390977	0.698113	345	116	229
ALMS1	1.15205	0.818534	1.62145	0.416981	1.23741	0.860975	1.77844	0.249693	0.520287	0.458647	0.627358	345	140	205
ALMS1P	0.80114	0.567479	1.13101	0.207593	0.775312	0.53822	1.11684	0.171762	0.485548	0.586466	0.471698	345	156	189
ALOX12	0.82831	0.589113	1.16463	0.278625	0.867432	0.608306	1.23694	0.432157	0.490531	0.496241	0.556604	345	186	159
ALOX12B	1.19402	0.786604	1.81246	0.404986	0.985115	0.625268	1.55206	0.948445	0.500284	0.210526	0.84434	345	61	284
ALOX12P2	1.4518	0.989481	2.13013	0.0566626	1.56111	1.02653	2.37408	0.0373065	0.549582	0.729323	0.372642	345	230	115
ALOX15	1.51182	1.01928	2.24239	0.0398898	1.14495	0.728069	1.80053	0.557864	0.536778	0.75188	0.358491	345	236	109
ALOX15B	1.39023	0.981001	1.97016	0.0640073	1.3621	0.940923	1.9718	0.101562	0.542151	0.609023	0.504717	345	186	159
ALOX5	1.7865	1.16346	2.74318	0.00800435	1.63945	1.054	2.55009	0.0282853	0.538339	0.804511	0.334906	345	248	97
ALOX5AP	1.2759	0.884544	1.84042	0.192373	1.27925	0.863714	1.8947	0.219117	0.519329	0.684211	0.386792	345	221	124
ALOXE3	1.11568	0.769827	1.6169	0.563132	1.05158	0.715113	1.54637	0.798221	0.518584	0.699248	0.363208	345	228	117
ALPI	0.601305	0.245929	1.47021	0.264819	0.610846	0.243099	1.5349	0.294396	0.48514	0.969925	0.0660377	345	19	326
ALPK1	1.11894	0.794361	1.57613	0.520287	1.19166	0.815921	1.74042	0.36425	0.505568	0.533835	0.518868	345	173	172
ALPK2	1.63498	1.13306	2.35922	0.00859735	1.53821	1.03382	2.28869	0.0336673	0.547808	0.684211	0.448113	345	208	137
ALPK3	1.61397	1.14729	2.27047	0.00597653	1.37865	0.960944	1.97792	0.0812232	0.566499	0.518797	0.636792	345	146	199
ALPL	1.45072	1.03224	2.03887	0.0321367	1.10884	0.759563	1.61874	0.592484	0.574762	0.481203	0.65566	345	137	208
ALPP	1.23834	0.870822	1.76096	0.234049	1.14126	0.781197	1.66728	0.494479	0.518974	0.37594	0.688679	345	116	229
ALPPL2	1.11081	0.788909	1.56406	0.547226	1.03511	0.720489	1.48713	0.851915	0.513459	0.451128	0.608491	345	143	202
ALS2	0.590417	0.325743	1.07015	0.0824685	0.786629	0.419342	1.47561	0.454608	0.527273	0.917293	0.169811	345	48	297
ALS2CL	0.766812	0.542091	1.08469	0.133475	0.689023	0.469923	1.01028	0.0564439	0.511172	0.413534	0.688679	345	225	120
ALS2CR11	1.4163	0.985313	2.03579	0.0601028	1.57887	1.04947	2.37533	0.028402	0.540857	0.330827	0.778302	345	91	254
ALS2CR12	0.829978	0.58558	1.17638	0.295019	0.578677	0.394288	0.849295	0.00519889	0.520748	0.406015	0.665094	345	221	124
ALS2CR4	0.910986	0.64832	1.28007	0.591134	0.981313	0.6891	1.39744	0.916704	0.505284	0.503759	0.556604	345	185	160
ALS2CR8	1.02427	0.726445	1.44419	0.891192	0.945429	0.642224	1.39178	0.776087	0.472549	0.571429	0.457547	345	155	190
ALX1	0.58024	0.255489	1.31778	0.193395	0.695046	0.294434	1.64074	0.406484	0.512715	0.962406	0.108491	345	29	316
ALX3	0.451522	0.273282	0.746014	0.00191118	0.417519	0.246326	0.707691	0.00117787	0.510853	0.142857	0.933962	345	313	32
ALX4	0.806264	0.573067	1.13436	0.216367	0.736016	0.508901	1.06449	0.103521	0.492197	0.548872	0.509434	345	169	176
AMAC1	0.525206	0.214728	1.28461	0.158203	0.533317	0.210676	1.35007	0.184651	0.496542	0.969925	0.0801887	345	22	323
AMAC1L2	1.3026	0.916398	1.85157	0.140647	1.11933	0.772535	1.6218	0.551278	0.530004	0.62406	0.490566	345	191	154
AMAC1L3	0.742324	0.526495	1.04663	0.0891392	0.641232	0.448254	0.917288	0.0149915	0.522237	0.548872	0.542453	345	176	169
AMACR	0.794771	0.563759	1.12044	0.189883	0.886718	0.617901	1.27248	0.514146	0.533994	0.451128	0.669811	345	216	129
AMBN	0.49591	0.122596	2.00599	0.325291	0.894999	0.213933	3.74427	0.879249	0.500177	0.992481	0.0283019	345	8	337
AMBP	1.69211	1.18739	2.41138	0.00361072	1.54125	1.03201	2.30178	0.034522	0.567403	0.360902	0.811321	345	88	257
AMBRA1	1.10438	0.784297	1.5551	0.569642	1.14818	0.790995	1.66667	0.467362	0.502199	0.541353	0.509434	345	176	169
AMD1	0.721095	0.512559	1.01447	0.0604556	0.81443	0.568266	1.16723	0.263628	0.528125	0.473684	0.632075	345	205	140
AMDHD1	0.614647	0.395305	0.955694	0.0306804	0.571059	0.358641	0.909289	0.0182439	0.527451	0.819549	0.273585	345	83	262
AMDHD2	1.29656	0.853616	1.96936	0.223294	1.07952	0.694852	1.67713	0.73357	0.505887	0.210526	0.853774	345	59	286
AMELX	1.08089	0.768988	1.51931	0.654298	1.03469	0.722921	1.48092	0.852116	0.509735	0.503759	0.556604	345	161	184
AMELY	1.13663	0.158635	8.14401	0.898571	1.30408	0.177916	9.55862	0.79391	0.482161	1	0.00471698	345	2	343
AMFR	0.707786	0.406497	1.23238	0.221904	0.674944	0.375503	1.21317	0.188829	0.507483	0.902256	0.179245	345	52	293
AMH	0.792878	0.560983	1.12063	0.18859	0.816076	0.549647	1.21165	0.313494	0.532097	0.593985	0.5	345	161	184
AMHR2	1.80491	1.2764	2.55223	0.000836079	1.96565	1.35238	2.85703	0.000396998	0.581129	0.593985	0.608491	345	162	183
AMICA1	1.56095	1.06864	2.28006	0.0212598	1.43487	0.932396	2.20813	0.100651	0.549227	0.285714	0.825472	345	75	270
AMIGO1	1.19046	0.846215	1.67474	0.316779	1.39119	0.947304	2.04308	0.0922071	0.540928	0.466165	0.627358	345	141	204
AMIGO2	1.51588	1.07793	2.13176	0.0167867	1.32681	0.912742	1.92873	0.138447	0.54068	0.503759	0.580189	345	156	189
AMIGO3	0.807077	0.573978	1.13484	0.217742	0.852786	0.594239	1.22382	0.387563	0.501099	0.511278	0.54717	345	182	163
AMMECR1	1.27861	0.905903	1.80465	0.162148	1.36281	0.937584	1.9809	0.104758	0.510853	0.56391	0.504717	345	180	165
AMMECR1L	1.26695	0.901065	1.78141	0.173572	1.30775	0.91269	1.87381	0.14371	0.521351	0.526316	0.54717	345	166	179
AMN	0.837337	0.593079	1.18219	0.313051	0.909653	0.628781	1.31599	0.61526	0.503298	0.578947	0.490566	345	161	184
AMN1	1.77262	1.20748	2.60226	0.00347294	1.67431	1.11049	2.52438	0.0138843	0.524649	0.729323	0.367925	345	231	114
AMOT	1.1276	0.798717	1.59191	0.494878	1.20697	0.834162	1.74639	0.318292	0.468329	0.56391	0.490566	345	183	162
AMOTL1	1.61854	1.15111	2.27576	0.00561701	1.37203	0.934529	2.01436	0.10645	0.571287	0.511278	0.627358	345	147	198
AMOTL2	1.12062	0.771042	1.6287	0.550519	1.14052	0.765045	1.70028	0.518673	0.534721	0.706767	0.377358	345	226	119
AMPD1	1.32827	0.944925	1.86715	0.102278	1.29806	0.917923	1.83563	0.140063	0.520428	0.518797	0.561321	345	162	183
AMPD2	0.777195	0.551432	1.09539	0.149976	0.788352	0.545647	1.13901	0.205274	0.515144	0.571429	0.495283	345	163	182
AMPD3	0.801718	0.568621	1.13037	0.20737	0.75464	0.519105	1.09705	0.140278	0.487551	0.541353	0.542453	345	177	168
AMPH	1.57026	1.11222	2.21694	0.0103362	1.43648	0.962669	2.14349	0.0761199	0.569194	0.421053	0.698113	345	120	225
AMT	1.47955	0.988586	2.21435	0.0568888	1.33448	0.868021	2.05159	0.188531	0.534863	0.766917	0.330189	345	244	101
AMTN	0.670094	0.407585	1.10167	0.114511	0.5841	0.342785	0.995297	0.0480076	0.51658	0.87218	0.245283	345	70	275
AMY1A	1.02646	0.589585	1.78705	0.926444	0.992108	0.542415	1.81462	0.97948	0.485672	0.902256	0.136792	345	43	302
AMY2A	0.551032	0.326054	0.931245	0.0260121	0.638952	0.363468	1.12324	0.119658	0.547294	0.887218	0.207547	345	60	285
AMY2B	0.751039	0.52314	1.07822	0.120717	0.623436	0.423466	0.917836	0.016646	0.507856	0.661654	0.415094	345	134	211
AMZ1	1.66341	0.998693	2.77054	0.05059	1.34105	0.781159	2.30223	0.287213	0.523833	0.87218	0.212264	345	283	62
AMZ2	0.850579	0.604118	1.19759	0.353886	0.876528	0.606637	1.26649	0.48279	0.514399	0.458647	0.627358	345	206	139
AMZ2P1	1.36723	0.970802	1.92553	0.073398	1.285	0.883435	1.8691	0.189631	0.523017	0.556391	0.528302	345	174	171
ANAPC1	1.34378	0.741178	2.43632	0.330379	1.49355	0.792284	2.81552	0.214915	0.493049	0.909774	0.136792	345	304	41
ANAPC10	0.826242	0.586659	1.16367	0.274646	0.830097	0.58107	1.18585	0.306184	0.531175	0.56391	0.54717	345	175	170
ANAPC11	1.47197	0.991642	2.18494	0.0550706	1.43909	0.953359	2.17231	0.0831636	0.546638	0.75188	0.363208	345	235	110
ANAPC13	0.590679	0.29926	1.16588	0.129123	0.544431	0.262671	1.12843	0.10204	0.49617	0.93985	0.122642	345	35	310
ANAPC16	0.898092	0.636741	1.26671	0.540173	0.847328	0.580483	1.23684	0.390626	0.511988	0.43609	0.641509	345	212	133
ANAPC2	0.526583	0.370921	0.747572	0.000334304	0.522647	0.363749	0.750956	0.000450191	0.537062	0.398496	0.716981	345	233	112
ANAPC4	1.06177	0.746137	1.51094	0.739123	1.10042	0.754988	1.6039	0.618608	0.502695	0.37594	0.679245	345	228	117
ANAPC5	0.794106	0.561591	1.12289	0.192148	0.897394	0.619791	1.29933	0.566439	0.516314	0.413534	0.665094	345	220	125
ANAPC7	0.732909	0.516863	1.03926	0.0811871	0.735521	0.504066	1.07325	0.111096	0.546248	0.421053	0.698113	345	226	119
ANG	0.952618	0.677742	1.33898	0.779898	0.918991	0.640967	1.31761	0.645835	0.457973	0.511278	0.514151	345	175	170
ANGEL1	1.21633	0.747769	1.97848	0.430132	1.26664	0.757523	2.11794	0.367485	0.51752	0.857143	0.216981	345	280	65
ANGEL2	1.80611	1.24282	2.62469	0.00193636	2.05139	1.33722	3.14697	0.000998626	0.508086	0.706767	0.419811	345	217	128
ANGPT1	2.98278	1.71054	5.20127	0.000117098	2.93281	1.55504	5.53126	0.000887824	0.578309	0.894737	0.259434	345	276	69
ANGPT2	1.63683	1.15405	2.32157	0.00571907	1.53791	1.04163	2.27063	0.0303783	0.578203	0.390977	0.773585	345	100	245
ANGPT4	1.25774	0.881179	1.79521	0.206527	1.24325	0.854742	1.80834	0.254733	0.519187	0.639098	0.419811	345	208	137
ANGPTL1	2.05832	1.30195	3.25411	0.00200777	1.59693	0.961122	2.65333	0.0707792	0.578167	0.834586	0.311321	345	257	88
ANGPTL2	1.85622	1.31792	2.61439	0.000400466	1.59244	1.09386	2.31827	0.0151761	0.576429	0.451128	0.731132	345	117	228
ANGPTL3	0.998361	0.708905	1.40601	0.99251	0.950896	0.665778	1.35812	0.781891	0.499078	0.458647	0.589623	345	198	147
ANGPTL4	1.49394	1.05614	2.1132	0.0232876	1.35001	0.937401	1.94424	0.10683	0.582033	0.593985	0.575472	345	169	176
ANGPTL5	1.39509	0.973599	1.99906	0.0696498	1.10492	0.739268	1.65143	0.626539	0.548163	0.661654	0.45283	345	204	141
ANGPTL6	1.22113	0.8618	1.73029	0.261217	1.39184	0.964179	2.00918	0.0775289	0.510569	0.390977	0.669811	345	122	223
ANGPTL7	1.67551	1.16816	2.40319	0.00503802	1.69603	1.09339	2.63083	0.0183445	0.531813	0.338346	0.787736	345	90	255
ANK1	1.12901	0.795623	1.6021	0.496786	1.32974	0.900329	1.96395	0.152066	0.494574	0.383459	0.650943	345	125	220
ANK2	1.98066	1.26315	3.10573	0.00290297	1.49654	0.910282	2.46036	0.111975	0.581678	0.827068	0.316038	345	255	90
ANK3	0.56236	0.365022	0.866385	0.00904356	0.749861	0.477774	1.1769	0.210673	0.515676	0.81203	0.283019	345	86	259
ANKAR	1.45038	0.997589	2.10869	0.0514959	1.5168	1.0056	2.28787	0.0469661	0.533941	0.706767	0.372642	345	227	118
ANKDD1A	1.61973	1.12262	2.33697	0.0099264	1.24849	0.837257	1.86171	0.276302	0.581891	0.684211	0.462264	345	205	140
ANKFN1	1.51783	0.967327	2.38162	0.0694559	1.63963	1.02096	2.63322	0.0407786	0.505639	0.172932	0.900943	345	44	301
ANKFY1	1.74594	1.1662	2.61386	0.00679464	2.19231	1.42319	3.37709	0.000369679	0.54983	0.233083	0.900943	345	52	293
ANKH	2.01626	1.28324	3.168	0.0023523	1.5463	0.914534	2.61448	0.103831	0.520677	0.827068	0.301887	345	258	87
ANKHD1	1.78921	1.14103	2.80561	0.0112518	1.595	0.98076	2.59394	0.0598815	0.536707	0.827068	0.283019	345	262	83
ANKHD1-EIF4EBP3	0.677038	0.438048	1.04642	0.079135	0.677749	0.430369	1.06733	0.0931989	0.513513	0.819549	0.259434	345	80	265
ANKIB1	1.37779	0.936269	2.02751	0.103976	1.37507	0.911605	2.07417	0.128843	0.517768	0.736842	0.34434	345	237	108
ANKK1	0.667709	0.463407	0.962083	0.030205	0.606417	0.414433	0.887336	0.0100119	0.52894	0.684211	0.424528	345	133	212
ANKLE1	1.16454	0.822674	1.64846	0.390294	1.07264	0.743051	1.54842	0.708131	0.51197	0.601504	0.476415	345	191	154
ANKLE2	0.889116	0.629447	1.25591	0.504817	0.853958	0.592036	1.23176	0.398278	0.510924	0.586466	0.504717	345	163	182
ANKMY1	1.24947	0.827404	1.88683	0.289578	1.08127	0.704362	1.65985	0.720869	0.497163	0.218045	0.834906	345	64	281
ANKMY2	0.635607	0.398301	1.0143	0.0573774	0.770284	0.472406	1.25599	0.295438	0.53841	0.849624	0.264151	345	77	268
ANKRA2	1.35706	0.965048	1.9083	0.0791891	1.31819	0.913697	1.90176	0.139591	0.522415	0.526316	0.556604	345	164	181
ANKRD1	1.59717	1.08098	2.35984	0.0187262	1.36844	0.890637	2.10257	0.152307	0.517839	0.255639	0.84434	345	67	278
ANKRD10	1.46322	0.952648	2.24743	0.0821378	1.11851	0.693725	1.8034	0.645848	0.519364	0.804511	0.283019	345	259	86
ANKRD11	0.78272	0.556886	1.10014	0.158393	0.68294	0.470919	0.990419	0.0443547	0.479146	0.511278	0.542453	345	181	164
ANKRD12	1.43569	1.01978	2.02124	0.0382495	1.21747	0.817841	1.81239	0.332362	0.535431	0.541353	0.570755	345	163	182
ANKRD13A	0.78805	0.556975	1.11499	0.178553	0.75917	0.521966	1.10417	0.149438	0.508689	0.586466	0.495283	345	161	184
ANKRD13B	0.711966	0.478163	1.06009	0.0943948	0.764273	0.501878	1.16385	0.210269	0.538942	0.766917	0.325472	345	101	244
ANKRD13C	0.700994	0.479177	1.02549	0.0672084	0.721242	0.480142	1.08341	0.11547	0.500851	0.729323	0.367925	345	115	230
ANKRD13D	1.41955	1.00576	2.0036	0.0463045	1.2015	0.837523	1.72366	0.318765	0.556852	0.578947	0.556604	345	171	174
ANKRD16	0.783163	0.548841	1.11752	0.17785	0.950492	0.640842	1.40976	0.800685	0.545255	0.37594	0.740566	345	241	104
ANKRD17	1.29727	0.89141	1.88792	0.173986	1.32157	0.861057	2.02837	0.202104	0.508973	0.293233	0.801887	345	81	264
ANKRD19	0.81779	0.574722	1.16366	0.263682	0.672555	0.459785	0.983787	0.0409337	0.531175	0.37594	0.726415	345	238	107
ANKRD2	1.53836	1.07915	2.19297	0.0172614	1.54453	1.06218	2.2459	0.0228592	0.557242	0.639098	0.485849	345	194	151
ANKRD20A3	1.12485	0.780206	1.62173	0.528509	1.31904	0.892355	1.94974	0.164906	0.526422	0.315789	0.75	345	95	250
ANKRD20A4	0.697542	0.46993	1.0354	0.0738817	0.742618	0.48862	1.12865	0.163529	0.504114	0.759398	0.316038	345	100	245
ANKRD20B	1.32719	0.774986	2.27285	0.302418	1.29293	0.734829	2.27492	0.372835	0.509186	0.887218	0.188679	345	290	55
ANKRD22	0.659299	0.448791	0.968546	0.0337688	0.783847	0.519375	1.18299	0.246158	0.572351	0.736842	0.419811	345	125	220
ANKRD23	1.15433	0.802457	1.6605	0.439141	0.994373	0.671146	1.47327	0.977557	0.500567	0.323308	0.735849	345	99	246
ANKRD24	0.817544	0.415299	1.60939	0.559927	0.708418	0.355838	1.41035	0.326474	0.493474	0.93985	0.0990566	345	30	315
ANKRD26	0.769888	0.478364	1.23907	0.281447	0.800271	0.483141	1.32556	0.38685	0.502234	0.857143	0.226415	345	68	277
ANKRD26P1	0.880665	0.586008	1.32348	0.540907	1.04995	0.686502	1.60582	0.822096	0.503688	0.781955	0.273585	345	88	257
ANKRD27	1.18952	0.846072	1.67239	0.318091	1.22914	0.860093	1.75655	0.257381	0.502731	0.503759	0.575472	345	157	188
ANKRD28	1.28834	0.762622	2.17645	0.343633	1.18788	0.685331	2.05896	0.539531	0.518797	0.879699	0.174528	345	292	53
ANKRD29	1.73487	1.1893	2.53072	0.00423801	1.77999	1.16896	2.71042	0.00719621	0.537239	0.285714	0.811321	345	78	267
ANKRD30A	0.831014	0.458747	1.50537	0.541442	1.09989	0.59276	2.04091	0.762743	0.479784	0.917293	0.117925	345	37	308
ANKRD30B	70.9005	7.80804	643.808	0.000153213	78.3767	6.88123	892.704	0.000441534	0.477922	1	0.00471698	345	2	343
ANKRD31	1.50226	1.06829	2.11253	0.0192961	1.55645	1.08085	2.24133	0.0174156	0.516527	0.511278	0.584906	345	156	189
ANKRD32	1.56365	1.1021	2.21848	0.012256	1.68876	1.15618	2.46667	0.00671407	0.50837	0.586466	0.504717	345	183	162
ANKRD33	1.85671	1.2613	2.7332	0.00170893	1.91473	1.23507	2.96838	0.00368685	0.586839	0.736842	0.443396	345	216	129
ANKRD34A	0.701765	0.4438	1.10968	0.129815	0.529229	0.325605	0.860193	0.0102395	0.502128	0.172932	0.896226	345	301	44
ANKRD34B	1.64442	1.1453	2.36103	0.00703691	1.43013	0.962888	2.12411	0.0762966	0.572954	0.669173	0.495283	345	196	149
ANKRD34C	2.00367	1.16946	3.43296	0.0114137	2.04327	1.14484	3.64678	0.0156228	0.505284	0.112782	0.962264	345	23	322
ANKRD35	1.60611	1.13676	2.26926	0.00721336	1.35445	0.911503	2.01265	0.133248	0.546106	0.586466	0.561321	345	171	174
ANKRD36	0.773125	0.518741	1.15225	0.206278	0.634521	0.410518	0.980753	0.0406151	0.492623	0.24812	0.816038	345	274	71
ANKRD36B	1.01439	0.718385	1.43237	0.935295	0.954517	0.664226	1.37168	0.80133	0.504043	0.428571	0.622642	345	137	208
ANKRD36BP1	1.3322	0.920539	1.92797	0.128275	1.76455	1.19628	2.60276	0.00418738	0.481416	0.308271	0.759434	345	92	253
ANKRD37	1.17995	0.822082	1.6936	0.369494	1.1872	0.81064	1.73868	0.378037	0.512821	0.669173	0.400943	345	216	129
ANKRD39	2.09451	0.921767	4.75932	0.0774904	3.13768	1.32682	7.42003	0.00921642	0.493226	0.0451128	0.990566	345	8	337
ANKRD40	1.50008	1.067	2.10894	0.0196429	1.455	1.0054	2.10565	0.0467528	0.551071	0.518797	0.599057	345	154	191
ANKRD42	0.584568	0.400584	0.853054	0.00536675	0.621856	0.419436	0.921964	0.0180619	0.546141	0.714286	0.40566	345	125	220
ANKRD43	0.906747	0.643784	1.27712	0.57535	0.878043	0.594441	1.29695	0.513437	0.47794	0.451128	0.570755	345	195	150
ANKRD44	1.5212	1.05378	2.19594	0.0251146	1.51256	0.9938	2.30212	0.0534899	0.544084	0.315789	0.787736	345	87	258
ANKRD45	1.84874	1.25492	2.72354	0.0018793	1.97149	1.29819	2.99397	0.0014516	0.553625	0.263158	0.849057	345	67	278
ANKRD46	0.824516	0.565824	1.20148	0.315159	0.734318	0.481534	1.1198	0.151461	0.490424	0.721805	0.339623	345	110	235
ANKRD49	0.843304	0.588506	1.20842	0.353132	0.689475	0.470244	1.01091	0.0568611	0.516314	0.661654	0.40566	345	132	213
ANKRD5	0.648516	0.456128	0.922051	0.0158674	0.612531	0.418616	0.896272	0.0116079	0.562668	0.631579	0.509434	345	158	187
ANKRD50	1.9399	1.378	2.73093	0.000146197	1.99831	1.37017	2.91441	0.000323556	0.590084	0.548872	0.660377	345	145	200
ANKRD52	0.707583	0.50144	0.998473	0.0489917	0.808653	0.557994	1.17191	0.261884	0.544013	0.43609	0.65566	345	215	130
ANKRD53	1.68212	1.18771	2.38233	0.00340303	1.53264	1.01824	2.30691	0.0406987	0.583629	0.601504	0.551887	345	175	170
ANKRD54	0.772661	0.548118	1.08919	0.140948	0.895407	0.625711	1.28135	0.545726	0.520109	0.451128	0.617925	345	205	140
ANKRD55	1.56109	1.08495	2.24619	0.0164315	1.17113	0.786772	1.74326	0.436368	0.559157	0.676692	0.45283	345	206	139
ANKRD56	0.793687	0.564017	1.11688	0.184923	0.847325	0.580301	1.23722	0.391005	0.514506	0.496241	0.59434	345	194	151
ANKRD57	1.24209	0.874674	1.76385	0.22566	1.17458	0.791187	1.74375	0.424777	0.50454	0.609023	0.457547	345	196	149
ANKRD58	0.743028	0.523682	1.05425	0.0961116	0.784907	0.543374	1.1338	0.196802	0.527451	0.62406	0.481132	345	153	192
ANKRD6	1.70301	1.2115	2.39393	0.00218265	1.41907	0.940439	2.14131	0.0954317	0.587637	0.503759	0.646226	345	142	203
ANKRD7	1.08145	0.758608	1.54168	0.665143	1.05566	0.724954	1.53722	0.777575	0.489928	0.646617	0.377358	345	128	217
ANKRD9	0.679452	0.382902	1.20567	0.186581	0.617384	0.330505	1.15327	0.130363	0.500851	0.909774	0.127358	345	40	305
ANKS1A	1.20927	0.854061	1.71223	0.284211	1.14429	0.790007	1.65747	0.475826	0.547418	0.398496	0.707547	345	115	230
ANKS1B	1.59031	1.12035	2.25739	0.00943565	1.72924	1.15966	2.57857	0.00721839	0.551727	0.383459	0.726415	345	109	236
ANKS3	1.23534	0.875933	1.7422	0.228276	0.905237	0.627549	1.3058	0.594312	0.527096	0.428571	0.665094	345	128	217
ANKS4B	0.739824	0.509895	1.07344	0.112557	0.779248	0.528502	1.14896	0.208014	0.547897	0.706767	0.419811	345	129	216
ANKS6	1.02537	0.729056	1.44212	0.88551	1.21692	0.841914	1.75897	0.296262	0.481558	0.511278	0.509434	345	172	173
ANKZF1	0.602249	0.428042	0.847355	0.00360582	0.605891	0.419625	0.874837	0.00750802	0.554547	0.473684	0.688679	345	217	128
ANLN	0.783398	0.548553	1.11878	0.179393	0.756648	0.508387	1.12614	0.169306	0.535431	0.360902	0.731132	345	241	104
ANO1	1.28336	0.911791	1.80634	0.15258	1.27006	0.88734	1.81785	0.191328	0.561675	0.548872	0.570755	345	164	181
ANO10	1.69569	1.07251	2.68096	0.0238542	1.54949	0.955018	2.514	0.0761353	0.538339	0.834586	0.292453	345	261	84
ANO2	1.45628	0.989612	2.14301	0.056522	1.14414	0.747131	1.75211	0.535738	0.543517	0.736842	0.372642	345	231	114
ANO3	2.16723	1.40081	3.35296	0.000513259	2.27168	1.38275	3.73206	0.00119775	0.601521	0.81203	0.382075	345	239	106
ANO4	1.88292	1.31	2.70639	0.000629021	1.45369	0.976397	2.16431	0.0654265	0.553589	0.669173	0.471698	345	201	144
ANO5	1.80732	1.21859	2.68048	0.00325012	1.48495	0.964532	2.28615	0.0725051	0.560186	0.75188	0.40566	345	226	119
ANO6	1.598	1.13673	2.24645	0.00698813	1.58013	1.10615	2.25719	0.0119217	0.5632	0.496241	0.636792	345	143	202
ANO7	0.800542	0.557691	1.14914	0.227735	0.745097	0.496627	1.11788	0.155146	0.509966	0.338346	0.745283	345	247	98
ANO8	1.27088	0.901819	1.79098	0.170829	1.26423	0.878966	1.81836	0.206121	0.528125	0.548872	0.556604	345	167	178
ANO9	0.686351	0.486633	0.968035	0.0319429	0.717433	0.493849	1.04224	0.0813637	0.573308	0.548872	0.617925	345	192	153
ANP32A	0.729777	0.513501	1.03714	0.0789866	0.74865	0.507523	1.10434	0.144406	0.557136	0.390977	0.745283	345	240	105
ANP32B	0.7555	0.53151	1.07388	0.118129	0.677387	0.463095	0.990842	0.0447095	0.524507	0.383459	0.726415	345	237	108
ANP32C	1.35867	0.859449	2.14786	0.189605	1.30719	0.808154	2.11438	0.274915	0.522007	0.834586	0.240566	345	272	73
ANP32D									0.523514	0.902256	0.146226	345	345	0
ANP32E	0.659911	0.454744	0.957645	0.0286874	0.600998	0.404691	0.892529	0.0116209	0.53614	0.308271	0.801887	345	263	82
ANPEP	1.52273	1.00831	2.29959	0.0455744	1.33602	0.867214	2.05825	0.188904	0.539261	0.781955	0.349057	345	242	103
ANTXR1	1.5677	1.10543	2.22329	0.0116599	1.39486	0.954571	2.03822	0.0854851	0.574408	0.609023	0.537736	345	179	166
ANTXR2	1.7593	1.22521	2.52622	0.00221168	1.86927	1.24794	2.79996	0.00241033	0.564867	0.330827	0.830189	345	80	265
ANTXRL									0.473666	0	1	345	345	0
ANUBL1	0.767936	0.389791	1.51293	0.445343	0.779004	0.388965	1.56016	0.480955	0.4928	0.93985	0.108491	345	32	313
ANXA1	1.21052	0.860832	1.70227	0.272028	1.15322	0.786374	1.69119	0.465548	0.525323	0.526316	0.556604	345	164	181
ANXA10	1.54315	0.984301	2.41928	0.0586254	1.46426	0.914416	2.34473	0.112397	0.531813	0.827068	0.264151	345	266	79
ANXA11	0.696597	0.495719	0.978875	0.0372537	0.787125	0.538113	1.15137	0.217359	0.543481	0.511278	0.59434	345	192	153
ANXA13	0.858665	0.60867	1.21134	0.385443	0.820527	0.569636	1.18192	0.288085	0.526706	0.518797	0.575472	345	187	158
ANXA2	0.832953	0.59184	1.17229	0.294512	0.797582	0.537861	1.18272	0.26053	0.51596	0.548872	0.523585	345	172	173
ANXA2P1	0.992957	0.622231	1.58456	0.976353	1.12628	0.680753	1.86339	0.643409	0.503369	0.849624	0.207547	345	65	280
ANXA2P2	0.919355	0.646039	1.3083	0.640426	1.00373	0.686149	1.46831	0.984684	0.519294	0.639098	0.424528	345	139	206
ANXA2P3	0.654835	0.4629	0.926353	0.0167469	0.574032	0.38958	0.845817	0.00500555	0.531051	0.413534	0.70283	345	228	117
ANXA3	0.905208	0.641738	1.27685	0.570406	0.918404	0.63036	1.33807	0.657563	0.51259	0.578947	0.485849	345	160	185
ANXA4	0.761541	0.536907	1.08016	0.12662	0.759149	0.529063	1.0893	0.134734	0.538835	0.616541	0.490566	345	156	189
ANXA5	1.79893	1.20241	2.69138	0.00428023	1.56193	1.0223	2.38641	0.0392136	0.578912	0.766917	0.386792	345	232	113
ANXA6	1.48981	1.03536	2.14374	0.0317829	1.50172	0.993855	2.2691	0.0535208	0.543198	0.323308	0.773585	345	91	254
ANXA7	0.772173	0.545093	1.09385	0.145641	0.767	0.530853	1.1082	0.157714	0.51369	0.406015	0.674528	345	223	122
ANXA8	1.67966	1.17989	2.39111	0.00400212	1.64905	1.11739	2.43368	0.0117716	0.560292	0.631579	0.504717	345	189	156
ANXA8L1	1.72607	0.633486	4.70303	0.28583	1.59871	0.545565	4.68484	0.392357	0.486204	0.977444	0.0235849	345	9	336
ANXA8L2	1.54254	1.08748	2.18802	0.0150925	1.53831	1.05938	2.23374	0.0236314	0.545467	0.609023	0.528302	345	181	164
ANXA9	0.706995	0.502242	0.995221	0.0468755	0.677831	0.465554	0.986899	0.042482	0.535253	0.556391	0.561321	345	179	166
AOAH	1.30986	0.929547	1.84578	0.122959	1.17201	0.802954	1.7107	0.410738	0.548198	0.481203	0.636792	345	141	204
AOC2	0.692308	0.491344	0.975469	0.035559	0.543296	0.377894	0.781093	0.000988487	0.524188	0.548872	0.561321	345	180	165
AOC3	1.6253	1.10786	2.38442	0.0129992	1.68311	1.05625	2.682	0.0285125	0.552029	0.270677	0.839623	345	70	275
AOX1	1.85876	1.23697	2.79312	0.00285009	1.4037	0.893889	2.20428	0.140808	0.586626	0.774436	0.396226	345	231	114
AOX2P	0.812392	0.200784	3.28702	0.770788	0.736643	0.177208	3.06218	0.674148	0.467868	0.992481	0.0188679	345	6	339
AP1AR	0.664462	0.47183	0.935738	0.019273	0.74367	0.497667	1.11127	0.148421	0.549262	0.473684	0.646226	345	208	137
AP1B1	1.15899	0.824778	1.62863	0.395279	1.21532	0.84837	1.74099	0.287634	0.4878	0.496241	0.54717	345	162	183
AP1G1	0.730206	0.513254	1.03887	0.0804652	0.715286	0.487607	1.04928	0.0865429	0.514683	0.383459	0.707547	345	233	112
AP1G2	0.833468	0.59288	1.17169	0.294539	0.882236	0.611339	1.27317	0.503183	0.500567	0.533835	0.509434	345	171	174
AP1M1	1.80239	1.24384	2.61178	0.00185223	1.73197	1.1488	2.61117	0.00873537	0.589977	0.699248	0.495283	345	200	145
AP1M2	0.628545	0.429577	0.91967	0.0167938	0.721182	0.46942	1.10797	0.135707	0.553057	0.285714	0.839623	345	274	71
AP1S1	0.61312	0.418127	0.899048	0.0122497	0.67455	0.448589	1.01433	0.0585446	0.586182	0.736842	0.410377	345	123	222
AP1S2	1.79491	1.18171	2.72629	0.00609081	1.69061	1.05835	2.70058	0.0280006	0.547666	0.789474	0.325472	345	248	97
AP1S3	0.733817	0.498135	1.08101	0.117378	0.819872	0.539151	1.24676	0.35305	0.566321	0.744361	0.377358	345	115	230
AP2A1	1.31797	0.852681	2.03715	0.213995	1.55674	0.968372	2.50259	0.0676581	0.516173	0.18797	0.877358	345	51	294
AP2A2	1.3073	0.910772	1.87647	0.146187	1.47207	1.00954	2.1465	0.0445059	0.530501	0.669173	0.424528	345	211	134
AP2B1	1.40407	0.970006	2.03237	0.0720867	1.84953	1.25659	2.72227	0.00182028	0.536672	0.691729	0.429245	345	213	132
AP2M1	1.15726	0.804438	1.66482	0.431198	1.21225	0.833462	1.76317	0.313963	0.531565	0.676692	0.40566	345	216	129
AP2S1	0.729477	0.518761	1.02578	0.0697392	0.698821	0.487272	1.00221	0.0514209	0.533338	0.533835	0.575472	345	185	160
AP3B1	1.39932	0.955679	2.04891	0.0841761	1.72036	1.12849	2.62265	0.0116741	0.559902	0.278195	0.834906	345	72	273
AP3B2	1.92957	1.12699	3.3037	0.0165884	1.6974	0.935619	3.07941	0.0816853	0.550397	0.887218	0.231132	345	281	64
AP3D1	1.11831	0.629693	1.98608	0.702766	1.22617	0.653042	2.30229	0.525873	0.497056	0.902256	0.150943	345	300	45
AP3M1	1.03298	0.731586	1.45853	0.853755	1.23121	0.855033	1.7729	0.263529	0.492162	0.458647	0.603774	345	145	200
AP3M2	1.24305	0.850424	1.81694	0.261273	1.30643	0.872696	1.95574	0.194118	0.499149	0.721805	0.339623	345	236	109
AP3S1	1.58288	0.991921	2.52591	0.0541113	1.62622	0.979295	2.70052	0.0602291	0.515499	0.842105	0.240566	345	273	72
AP3S2	0.743678	0.513065	1.07795	0.117897	0.769593	0.515941	1.14795	0.199253	0.508476	0.699248	0.358491	345	117	228
AP4B1	1.03656	0.730295	1.47126	0.840742	1.03066	0.708397	1.49952	0.87457	0.477692	0.609023	0.457547	345	196	149
AP4E1	1.68488	1.08785	2.60957	0.0194284	1.78208	1.12967	2.81128	0.012985	0.547986	0.18797	0.924528	345	41	304
AP4M1	1.45798	0.837726	2.53749	0.182311	1.89233	1.06307	3.36847	0.0301706	0.514151	0.894737	0.179245	345	293	52
AP4S1	1.78565	1.26748	2.51565	0.0009151	1.71092	1.16637	2.50971	0.00600964	0.589694	0.451128	0.716981	345	120	225
APAF1	0.657859	0.464549	0.931612	0.0183231	0.671287	0.463593	0.97203	0.0348444	0.554618	0.406015	0.740566	345	237	108
APBA1	1.72406	1.19993	2.47712	0.00322266	1.42287	0.916043	2.21012	0.116492	0.567421	0.669173	0.476415	345	200	145
APBA2	1.62232	1.11291	2.36488	0.0118583	1.31242	0.874496	1.96964	0.189342	0.548056	0.714286	0.433962	345	215	130
APBA3	1.17464	0.83226	1.65786	0.359896	1.10621	0.765944	1.59764	0.590431	0.513371	0.578947	0.504717	345	182	163
APBB1	1.82813	1.27514	2.62093	0.00102947	1.47614	0.961014	2.26739	0.0753438	0.599482	0.661654	0.523585	345	189	156
APBB1IP	1.55214	1.0963	2.19753	0.0132039	1.46396	1.00815	2.12587	0.0452198	0.558377	0.601504	0.542453	345	177	168
APBB2	1.57191	1.11773	2.21063	0.00933011	1.55287	1.08707	2.21826	0.0155728	0.580756	0.533835	0.641509	345	147	198
APBB3	1.36963	0.944611	1.98589	0.0970441	1.08333	0.728953	1.60999	0.69213	0.534225	0.699248	0.400943	345	220	125
APC	1.32761	0.940126	1.8748	0.107544	1.56989	1.07507	2.29246	0.0195599	0.549191	0.578947	0.528302	345	177	168
APC2	0.746057	0.526419	1.05734	0.0996405	0.726213	0.485894	1.08539	0.118686	0.515073	0.398496	0.674528	345	224	121
APCDD1	0.387271	0.202453	0.740807	0.00414987	0.430974	0.219115	0.847678	0.0147372	0.512484	0.932331	0.146226	345	41	304
APCDD1L	1.47259	0.988941	2.19276	0.0567515	1.13623	0.737244	1.75115	0.562785	0.536743	0.759398	0.325472	345	244	101
APCS	1.36695	0.190635	9.8018	0.755804	2.78796	0.355356	21.873	0.32929	0.473507	1	0.00943396	345	3	342
APEH	0.52504	0.322764	0.854081	0.0094497	0.680534	0.402233	1.15139	0.15142	0.513087	0.864662	0.216981	345	65	280
APEX1	1.40714	1.00014	1.97976	0.0499076	1.44236	0.998809	2.08289	0.0507477	0.527061	0.458647	0.646226	345	136	209
APEX2	0.635618	0.439666	0.918901	0.0159651	0.678682	0.448011	1.02812	0.0673856	0.535289	0.315789	0.806604	345	263	82
APH1A	0.630545	0.439866	0.903884	0.0120744	0.603035	0.404027	0.900067	0.0133153	0.564619	0.345865	0.820755	345	262	83
APH1B	1.52228	1.07964	2.1464	0.0165253	1.27337	0.862642	1.87966	0.223865	0.572528	0.548872	0.570755	345	164	181
API5	1.0261	0.730002	1.4423	0.882087	0.981573	0.668623	1.441	0.924356	0.485317	0.496241	0.537736	345	164	181
APIP	0.923487	0.57909	1.4727	0.738165	0.715953	0.422118	1.21433	0.215133	0.51103	0.849624	0.216981	345	67	278
APITD1	0.674212	0.477395	0.95217	0.0252054	0.681476	0.467372	0.993663	0.046261	0.55476	0.593985	0.542453	345	170	175
APLF	0.894992	0.636529	1.2584	0.52344	0.800092	0.557233	1.1488	0.226896	0.503582	0.481203	0.580189	345	193	152
APLN	1.20306	0.842748	1.71743	0.308714	1.10596	0.750007	1.63085	0.611281	0.522663	0.646617	0.448113	345	203	142
APLNR	1.53282	1.03728	2.26509	0.0320573	1.17633	0.771011	1.79472	0.451178	0.561569	0.744361	0.377358	345	231	114
APLP1	0.599489	0.379221	0.947698	0.0285336	0.657708	0.403335	1.07251	0.0930741	0.505072	0.842105	0.254717	345	76	269
APLP2	1.48349	1.0423	2.11143	0.0285211	1.34927	0.92219	1.97414	0.122883	0.573025	0.631579	0.504717	345	189	156
APOA1	1.48164	1.0399	2.11101	0.0295109	1.52167	1.02003	2.27002	0.0396746	0.539403	0.631579	0.462264	345	198	147
APOA1BP	0.626844	0.422767	0.929434	0.0201195	0.521666	0.340596	0.798997	0.00277534	0.538481	0.255639	0.853774	345	281	64
APOA2	1.41727	1.0076	1.99351	0.0451258	1.37837	0.959109	1.98092	0.0828609	0.522184	0.488722	0.599057	345	150	195
APOA4	1.3277	0.93971	1.87587	0.10798	1.29666	0.89334	1.88207	0.171739	0.508015	0.428571	0.641509	345	133	212
APOA5	1.43272	1.01079	2.03077	0.0433534	1.52847	1.03818	2.25029	0.0315675	0.571659	0.390977	0.735849	345	108	237
APOB	2.13506	1.20396	3.78625	0.00945916	1.76759	0.916232	3.41002	0.0893158	0.552561	0.902256	0.207547	345	288	57
APOB48R	1.50326	0.958718	2.35708	0.0756901	1.64461	1.01247	2.67142	0.0444259	0.519045	0.827068	0.25	345	269	76
APOBEC1	0.844148	0.557967	1.27711	0.422522	0.769327	0.500888	1.18163	0.231027	0.533728	0.789474	0.316038	345	96	249
APOBEC2	1.68052	1.14511	2.46628	0.00799537	1.51216	0.997868	2.29152	0.0511878	0.54873	0.729323	0.410377	345	222	123
APOBEC3A	0.868429	0.613489	1.22931	0.426265	0.700804	0.482308	1.01828	0.0621904	0.506739	0.406015	0.650943	345	218	127
APOBEC3B	0.640354	0.384253	1.06715	0.0871616	0.662659	0.384722	1.14139	0.138002	0.508937	0.135338	0.929245	345	313	32
APOBEC3C	0.974765	0.682999	1.39117	0.888002	1.02987	0.697203	1.52127	0.882438	0.498581	0.654135	0.400943	345	132	213
APOBEC3D	0.893832	0.63142	1.2653	0.526765	0.955943	0.655542	1.394	0.814911	0.518584	0.413534	0.650943	345	217	128
APOBEC3F	0.777858	0.533213	1.13475	0.192285	0.692271	0.45978	1.04232	0.0781637	0.512378	0.721805	0.339623	345	110	235
APOBEC3G	1.91789	1.0338	3.55803	0.0388864	2.01206	1.03613	3.9072	0.0389433	0.501631	0.917293	0.15566	345	301	44
APOBEC3H	0.715375	0.498117	1.02739	0.0697333	0.729724	0.469912	1.13319	0.160569	0.529189	0.669173	0.438679	345	138	207
APOBEC4	0.875513	0.579899	1.32182	0.527052	0.888986	0.574871	1.37474	0.596763	0.491949	0.789474	0.268868	345	86	259
APOC1	1.76185	1.1048	2.80966	0.0173832	1.61273	0.98237	2.64759	0.0588063	0.522308	0.842105	0.264151	345	268	77
APOC1P1	1.49159	1.06115	2.09662	0.0213566	1.73322	1.20824	2.48629	0.00281231	0.532593	0.481203	0.622642	345	144	201
APOC2	0.817417	0.575229	1.16157	0.260787	0.741016	0.506829	1.08341	0.121966	0.477479	0.631579	0.438679	345	143	202
APOC3	1.35777	0.96545	1.90952	0.0787688	1.26517	0.858068	1.86541	0.235117	0.545911	0.496241	0.599057	345	151	194
APOC4	1.61	1.13462	2.28456	0.00764534	1.88838	1.31102	2.71998	0.000638994	0.552862	0.593985	0.537736	345	177	168
APOD	2.08162	1.43558	3.0184	0.000110136	1.85186	1.22055	2.80971	0.0037681	0.602213	0.699248	0.5	345	199	146
APOE	2.6089	1.43932	4.7289	0.00157752	2.99384	1.56102	5.74182	0.000965869	0.544687	0.909774	0.226415	345	285	60
APOF	1.20433	0.851757	1.70285	0.292779	1.1223	0.776584	1.62192	0.539129	0.508352	0.406015	0.646226	345	129	216
APOH	1.38326	0.979367	1.95371	0.0655307	1.3693	0.923286	2.03076	0.118046	0.550043	0.421053	0.674528	345	125	220
APOL1	0.896684	0.590261	1.36218	0.609234	1.00234	0.64529	1.55695	0.991702	0.503618	0.218045	0.830189	345	281	64
APOL2	0.752133	0.439296	1.28775	0.299179	0.799061	0.450359	1.41775	0.443221	0.49014	0.120301	0.933962	345	316	29
APOL3	0.879168	0.620035	1.2466	0.469804	0.894155	0.601658	1.32885	0.579952	0.50493	0.398496	0.646226	345	218	127
APOL4	1.73985	1.14976	2.63281	0.00878737	1.65943	1.07059	2.57214	0.0235131	0.533622	0.781955	0.330189	345	246	99
APOL5	0.856969	0.585846	1.25356	0.426377	0.791778	0.532759	1.17673	0.248116	0.498635	0.729323	0.29717	345	100	245
APOL6	0.793556	0.547518	1.15016	0.222029	0.836624	0.561701	1.2461	0.380186	0.516102	0.308271	0.764151	345	255	90
APOLD1	1.99339	1.21162	3.27957	0.00661467	1.74184	1.01161	2.99919	0.0453269	0.575011	0.864662	0.273585	345	269	76
APOM	0.682849	0.475693	0.980217	0.0386122	0.738723	0.507597	1.07509	0.1137	0.533267	0.676692	0.45283	345	140	205
APOO	0.781341	0.552603	1.10476	0.162649	0.829538	0.573929	1.19899	0.320043	0.556533	0.601504	0.514151	345	163	182
APOOL	0.784634	0.557802	1.10371	0.163572	0.901328	0.62862	1.29234	0.572037	0.528586	0.541353	0.54717	345	178	167
APP	1.23298	0.858775	1.77024	0.256408	1.35061	0.919571	1.98368	0.125413	0.491382	0.669173	0.400943	345	216	129
APPBP2	1.58799	1.12699	2.23757	0.00821101	1.69471	1.17027	2.45416	0.0052343	0.531458	0.56391	0.59434	345	161	184
APPL1	1.42448	1.0107	2.00768	0.0433068	1.99241	1.35969	2.91954	0.000406087	0.519329	0.56391	0.54717	345	171	174
APPL2	1.35218	0.961394	1.90182	0.0829657	1.23944	0.854545	1.7977	0.257863	0.516953	0.511278	0.570755	345	159	186
APRT	2.20066	1.02615	4.71947	0.0427359	1.97652	0.903816	4.32239	0.087887	0.500922	0.947368	0.108491	345	315	30
APTX	0.782505	0.545894	1.12167	0.181885	0.787824	0.529805	1.1715	0.238774	0.525429	0.345865	0.731132	345	243	102
AQP1	1.36322	0.957456	1.94095	0.0856509	1.40366	0.958559	2.05544	0.0814261	0.53309	0.631579	0.448113	345	201	144
AQP10	1.33602	0.944477	1.88988	0.101601	1.38463	0.967905	1.98078	0.0748472	0.523408	0.571429	0.490566	345	184	161
AQP11	0.725008	0.514363	1.02192	0.0663335	0.737752	0.515191	1.05646	0.096879	0.550078	0.56391	0.566038	345	179	166
AQP12A	0.860491	0.593815	1.24693	0.427247	0.927717	0.63	1.36613	0.703964	0.51557	0.706767	0.358491	345	116	229
AQP12B	1.39942	0.94741	2.06709	0.0913102	1.39188	0.890207	2.17627	0.147067	0.518123	0.744361	0.339623	345	239	106
AQP2	0.783497	0.557046	1.10201	0.160954	0.818473	0.577182	1.16064	0.260995	0.489786	0.473684	0.589623	345	196	149
AQP3	0.697369	0.490988	0.990501	0.0440858	0.586344	0.399153	0.861323	0.00651216	0.51862	0.609023	0.509434	345	161	184
AQP4	1.36443	0.970448	1.91837	0.0738708	1.26581	0.865868	1.85048	0.223754	0.521368	0.481203	0.59434	345	150	195
AQP5	0.964981	0.685886	1.35764	0.837848	0.859209	0.597558	1.23543	0.412817	0.497269	0.533835	0.514151	345	172	173
AQP6	0.445547	0.283182	0.701006	0.000471882	0.32021	0.194845	0.526237	7.02545e-06	0.546124	0.180451	0.924528	345	306	39
AQP7	1.15787	0.821897	1.63117	0.401884	1.06657	0.732674	1.55263	0.736581	0.534242	0.556391	0.518868	345	176	169
AQP7P1	1.43276	0.999754	2.05332	0.0501567	1.46553	0.998669	2.15065	0.0508006	0.515499	0.338346	0.75	345	98	247
AQP7P3	0.782167	0.480965	1.27199	0.322045	0.788232	0.462293	1.34397	0.382077	0.476628	0.864662	0.179245	345	57	288
AQP8	1.59738	1.10385	2.31157	0.0129926	1.63739	1.11116	2.41284	0.012674	0.547365	0.308271	0.806604	345	82	263
AQP9	1.29266	0.919995	1.81627	0.139034	1.34556	0.933215	1.9401	0.111891	0.514967	0.496241	0.575472	345	156	189
AQPEP	1.49188	1.06121	2.09734	0.0213465	1.18063	0.820002	1.69986	0.371924	0.592566	0.473684	0.683962	345	130	215
AQR	1.26724	0.895904	1.79247	0.180682	1.34425	0.937948	1.92656	0.107158	0.504717	0.421053	0.650943	345	130	215
AR	2.11695	1.4259	3.14291	0.000199471	1.64146	1.07391	2.50895	0.0220578	0.588275	0.75188	0.433962	345	220	125
ARAF	1.40001	0.951021	2.06098	0.0881139	1.36394	0.911342	2.0413	0.131376	0.521421	0.263158	0.84434	345	68	277
ARAP1	1.0839	0.770109	1.52556	0.644072	0.957875	0.668872	1.37175	0.814298	0.547241	0.458647	0.636792	345	138	207
ARAP2	1.21454	0.849922	1.73558	0.285901	1.27937	0.873695	1.87342	0.205483	0.498156	0.353383	0.688679	345	113	232
ARAP3	1.31	0.930267	1.84475	0.122082	1.07072	0.731545	1.56714	0.725166	0.531955	0.548872	0.542453	345	170	175
ARC	1.51381	1.06935	2.14301	0.0193841	1.43307	0.986067	2.08271	0.0592406	0.578415	0.593985	0.580189	345	168	177
ARCN1	0.827999	0.588303	1.16536	0.279077	0.747617	0.516871	1.08138	0.122461	0.509115	0.488722	0.570755	345	190	155
AREG	0.684208	0.478675	0.977993	0.0373378	0.732627	0.49269	1.08941	0.124314	0.538835	0.360902	0.759434	345	247	98
ARF1	2.03517	1.16679	3.54987	0.0123007	1.86538	1.04674	3.32426	0.0344352	0.506916	0.105263	0.95283	345	24	321
ARF3	0.714932	0.503841	1.01446	0.0601714	0.695739	0.473633	1.022	0.0644509	0.547063	0.616541	0.5	345	158	187
ARF4	0.841692	0.598319	1.18406	0.322308	1.03406	0.710527	1.50491	0.861134	0.489786	0.481203	0.570755	345	191	154
ARF5	0.626167	0.42045	0.932535	0.0212404	0.733559	0.47976	1.12162	0.152662	0.528905	0.24812	0.834906	345	278	67
ARF6	0.812455	0.564636	1.16904	0.263265	1.07378	0.720845	1.59951	0.726274	0.539793	0.676692	0.419811	345	133	212
ARFGAP1	1.1252	0.781967	1.61909	0.525215	0.897569	0.578918	1.39161	0.629106	0.527734	0.676692	0.415094	345	214	131
ARFGAP2	0.782078	0.533993	1.14542	0.206744	0.828034	0.541969	1.26509	0.382882	0.501844	0.285714	0.778302	345	261	84
ARFGAP3	0.861796	0.609022	1.21948	0.40107	0.938185	0.650719	1.35264	0.732486	0.516882	0.593985	0.476415	345	156	189
ARFGEF1	1.14859	0.803129	1.64265	0.447898	1.03704	0.707096	1.52093	0.852342	0.51525	0.345865	0.716981	345	106	239
ARFGEF2	1.08617	0.763727	1.54474	0.645533	0.795899	0.518442	1.22184	0.296568	0.518371	0.37594	0.693396	345	115	230
ARFIP1	0.782996	0.551519	1.11163	0.171273	0.905721	0.618302	1.32675	0.611175	0.50954	0.62406	0.45283	345	147	198
ARFIP2	0.668119	0.440218	1.01401	0.0581421	0.527178	0.333911	0.832307	0.00600035	0.532097	0.218045	0.867925	345	289	56
ARFRP1	1.25981	0.709767	2.23612	0.43015	1.05035	0.582586	1.89367	0.870249	0.504362	0.902256	0.136792	345	303	42
ARG1	2.12032	1.30299	3.45034	0.00248369	2.43103	1.45562	4.06009	0.000687191	0.53802	0.142857	0.957547	345	28	317
ARG2	3.27922	1.04325	10.3075	0.0421103	2.55289	0.79182	8.23071	0.116611	0.489147	0.977444	0.0801887	345	325	20
ARGFX	0.963779	0.67818	1.36965	0.836989	0.882872	0.599081	1.3011	0.528931	0.516811	0.631579	0.419811	345	139	206
ARGFXP2	0.948606	0.664452	1.35428	0.771468	0.77382	0.515046	1.16261	0.216997	0.486062	0.360902	0.688679	345	232	113
ARGLU1	0.71099	0.504558	1.00188	0.0512684	0.62477	0.430445	0.906823	0.0133421	0.535892	0.443609	0.683962	345	220	125
ARHGAP1	1.45761	1.02339	2.07608	0.0367921	1.27897	0.874971	1.86951	0.20395	0.568237	0.368421	0.778302	345	96	249
ARHGAP10	1.66387	1.18052	2.3451	0.00364012	1.70749	1.18491	2.46054	0.00410312	0.584799	0.43609	0.740566	345	113	232
ARHGAP11A	0.651761	0.462194	0.919077	0.0146392	0.693915	0.466657	1.03184	0.0710585	0.537168	0.451128	0.665094	345	215	130
ARHGAP11B	0.67941	0.472287	0.977369	0.0372198	0.649147	0.438793	0.960342	0.0305813	0.546407	0.338346	0.801887	345	259	86
ARHGAP12	0.681425	0.477231	0.972987	0.0348021	0.700602	0.478589	1.0256	0.0672586	0.542453	0.654135	0.481132	345	149	196
ARHGAP15	1.73075	1.17138	2.55723	0.00588435	1.62717	1.02524	2.5825	0.0388537	0.550858	0.255639	0.853774	345	65	280
ARHGAP17	1.35512	0.850054	2.16027	0.201534	1.11314	0.681078	1.8193	0.668918	0.522024	0.842105	0.240566	345	273	72
ARHGAP18	0.964176	0.684474	1.35817	0.834689	0.88244	0.613298	1.26969	0.500497	0.485494	0.488722	0.561321	345	188	157
ARHGAP19	1.87672	1.15113	3.05968	0.0115918	2.13154	1.28304	3.54117	0.00347453	0.509434	0.142857	0.919811	345	36	309
ARHGAP20	1.65196	1.16508	2.34231	0.00483838	1.35515	0.918524	1.99932	0.12561	0.584303	0.609023	0.556604	345	175	170
ARHGAP21	0.855788	0.607279	1.20599	0.373577	0.897577	0.626291	1.28637	0.556205	0.488012	0.56391	0.485849	345	162	183
ARHGAP22	1.22398	0.86992	1.72213	0.246017	1.01809	0.696464	1.48825	0.926245	0.551532	0.473684	0.641509	345	139	206
ARHGAP23	1.41397	0.993572	2.01224	0.0543366	0.994666	0.652211	1.51693	0.980183	0.543552	0.631579	0.471698	345	196	149
ARHGAP24	1.56588	1.11187	2.20527	0.0102587	1.44491	0.980222	2.12988	0.0630183	0.568769	0.556391	0.589623	345	161	184
ARHGAP25	1.44471	0.99118	2.10575	0.0556358	1.39481	0.915084	2.12603	0.121784	0.529366	0.285714	0.801887	345	80	265
ARHGAP26	1.20095	0.853242	1.69036	0.293745	1.25653	0.861618	1.83245	0.235526	0.513903	0.458647	0.627358	345	140	205
ARHGAP27	0.71074	0.504288	1.00171	0.0511534	0.72439	0.498383	1.05289	0.0910532	0.542311	0.443609	0.683962	345	220	125
ARHGAP28	1.58101	1.12257	2.22667	0.00874951	1.54953	1.06186	2.26116	0.0231321	0.563626	0.556391	0.561321	345	167	178
ARHGAP29	1.62561	1.0768	2.45415	0.0207754	1.31112	0.835769	2.05684	0.238368	0.580437	0.781955	0.358491	345	240	105
ARHGAP30	0.869199	0.498678	1.51502	0.620949	0.731399	0.397898	1.34443	0.313901	0.481309	0.902256	0.141509	345	44	301
ARHGAP31	1.63462	1.10662	2.41454	0.0135509	1.29157	0.846545	1.97054	0.235205	0.557384	0.744361	0.377358	345	231	114
ARHGAP32	0.756918	0.537194	1.06652	0.111412	0.737744	0.509556	1.06812	0.107194	0.520287	0.548872	0.551887	345	178	167
ARHGAP33	1.49671	0.990266	2.26215	0.0556778	1.43014	0.920514	2.2219	0.111491	0.532061	0.218045	0.882075	345	54	291
ARHGAP36	2.20363	0.543379	8.9366	0.26869	3.37465	0.760598	14.9728	0.109601	0.470279	0.992481	0.00943396	345	4	341
ARHGAP39	0.67524	0.480053	0.94979	0.0240767	0.739911	0.496807	1.10197	0.138295	0.544865	0.473684	0.650943	345	209	136
ARHGAP4	1.33929	0.913231	1.96412	0.13482	1.22372	0.812307	1.84351	0.334206	0.503511	0.729323	0.34434	345	236	109
ARHGAP42	1.3387	0.952443	1.8816	0.0930677	1.28568	0.888587	1.86022	0.182452	0.551426	0.511278	0.622642	345	148	197
ARHGAP5	1.39178	0.985696	1.96517	0.0603653	1.3872	0.965699	1.99266	0.0765464	0.539793	0.421053	0.674528	345	125	220
ARHGAP6	1.62784	1.14565	2.31297	0.00655601	1.63105	1.11012	2.39643	0.012698	0.563803	0.62406	0.556604	345	177	168
ARHGAP8	0.678872	0.468534	0.983635	0.040641	0.65391	0.435074	0.982817	0.0410192	0.553554	0.308271	0.811321	345	265	80
ARHGAP9	1.28982	0.892051	1.86496	0.176126	1.21903	0.805337	1.84523	0.349073	0.522131	0.308271	0.768868	345	90	255
ARHGDIA	1.20472	0.851179	1.70512	0.293331	1.15883	0.80107	1.67636	0.433915	0.536033	0.601504	0.504717	345	185	160
ARHGDIB	1.26593	0.896452	1.78768	0.180516	1.04411	0.717486	1.51942	0.821595	0.538871	0.578947	0.518868	345	179	166
ARHGDIG	1.46717	1.04391	2.06205	0.027284	1.45071	1.00048	2.10355	0.0497061	0.565754	0.503759	0.627358	345	146	199
ARHGEF1	1.33164	0.944312	1.87783	0.102422	1.09057	0.755859	1.57348	0.642998	0.559015	0.428571	0.698113	345	121	224
ARHGEF10	1.86838	1.22334	2.85353	0.00381673	1.43506	0.887181	2.32127	0.140994	0.556533	0.796992	0.330189	345	248	97
ARHGEF10L	0.790257	0.495675	1.25991	0.322598	0.925692	0.571062	1.50055	0.754057	0.511172	0.849624	0.226415	345	69	276
ARHGEF11	1.01822	0.700395	1.48027	0.924639	1.12717	0.748308	1.69784	0.566816	0.494609	0.293233	0.75	345	92	253
ARHGEF12	0.883165	0.627674	1.24265	0.475792	0.777056	0.540851	1.11642	0.172467	0.511278	0.473684	0.584906	345	195	150
ARHGEF15	1.6751	1.00568	2.79012	0.0475093	1.21666	0.69662	2.12491	0.49064	0.572173	0.87218	0.254717	345	274	71
ARHGEF16	0.735763	0.516744	1.04761	0.0887601	0.822617	0.551561	1.22688	0.338363	0.538339	0.383459	0.70283	345	232	113
ARHGEF17	1.67198	1.18744	2.35426	0.00324102	1.22377	0.834053	1.79559	0.301918	0.596468	0.533835	0.641509	345	147	198
ARHGEF18	2.25638	0.99449	5.11945	0.0515652	3.83204	1.35934	10.8027	0.0110684	0.518159	0.954887	0.127358	345	312	33
ARHGEF19	0.716608	0.509777	1.00736	0.055138	0.557185	0.379431	0.818212	0.00285051	0.537594	0.533835	0.575472	345	185	160
ARHGEF2	0.816188	0.510977	1.30371	0.395306	0.757608	0.459141	1.2501	0.277314	0.53004	0.849624	0.231132	345	70	275
ARHGEF3	1.18298	0.841843	1.66235	0.332997	1.15669	0.788241	1.69736	0.456936	0.51103	0.503759	0.570755	345	158	187
ARHGEF33	1.41092	0.918862	2.16649	0.115663	1.1868	0.754506	1.86679	0.458653	0.52261	0.804511	0.278302	345	260	85
ARHGEF35	0.610514	0.428044	0.87077	0.00645383	0.679042	0.464183	0.993353	0.0461165	0.560718	0.646617	0.481132	345	150	195
ARHGEF37	0.257036	0.0804711	0.821008	0.0218585	0.189132	0.0515883	0.693391	0.0119922	0.495389	0.984962	0.0518868	345	14	331
ARHGEF38	0.594131	0.413338	0.854002	0.00491592	0.53002	0.358504	0.783593	0.00146024	0.598205	0.676692	0.509434	345	152	193
ARHGEF4	2.2803	1.28534	4.04543	0.00482979	1.90051	0.978228	3.69233	0.0580923	0.568875	0.902256	0.240566	345	281	64
ARHGEF5	0.465315	0.23626	0.916438	0.026946	0.47976	0.237409	0.969507	0.0407328	0.531494	0.93985	0.15566	345	42	303
ARHGEF6	1.61867	1.1455	2.28728	0.00633372	1.578	1.04657	2.37929	0.0294643	0.566676	0.413534	0.721698	345	114	231
ARHGEF7	0.919293	0.646879	1.30643	0.638862	0.783709	0.534922	1.1482	0.211029	0.485743	0.383459	0.650943	345	221	124
ARHGEF9	1.28603	0.915094	1.80733	0.147361	1.23024	0.842063	1.79735	0.284059	0.533799	0.488722	0.599057	345	150	195
ARID1A	0.873052	0.614497	1.2404	0.448655	0.819136	0.56465	1.18832	0.293251	0.495248	0.383459	0.698113	345	231	114
ARID1B	1.27645	0.908371	1.79367	0.159643	1.3781	0.951617	1.99573	0.089607	0.52128	0.488722	0.608491	345	148	197
ARID2	1.05264	0.70991	1.56082	0.798539	0.987191	0.647214	1.50576	0.952277	0.479181	0.255639	0.768868	345	263	82
ARID3A	0.914755	0.647979	1.29136	0.612526	0.820396	0.561691	1.19826	0.305731	0.493758	0.43609	0.622642	345	208	137
ARID3B	0.648613	0.426671	0.986003	0.0427722	0.70555	0.450588	1.10478	0.1274	0.50649	0.218045	0.858491	345	287	58
ARID3C	0.634862	0.417734	0.964846	0.0333754	0.720496	0.464809	1.11683	0.142686	0.537452	0.796992	0.311321	345	94	251
ARID4A	1.47497	1.03581	2.10033	0.0311587	1.58381	1.06127	2.36365	0.0243815	0.550113	0.368421	0.754717	345	101	244
ARID4B	1.64505	1.16619	2.32053	0.00456995	1.55139	1.06028	2.26999	0.0237376	0.550397	0.428571	0.707547	345	119	226
ARID5A	1.6042	1.02991	2.49871	0.0365885	1.43692	0.897706	2.3	0.130955	0.554653	0.819549	0.301887	345	257	88
ARID5B	1.25821	0.89523	1.76837	0.185951	1.1749	0.809137	1.70601	0.396977	0.52965	0.518797	0.570755	345	160	185
ARIH1	1.43538	1.01899	2.02192	0.0386813	1.37875	0.961705	1.97664	0.0805492	0.531175	0.548872	0.575472	345	163	182
ARIH2	1.45758	0.94316	2.25258	0.0897959	1.63573	1.0257	2.60857	0.0387779	0.517591	0.81203	0.301887	345	256	89
ARL1	0.802021	0.514299	1.25071	0.330468	0.956651	0.596272	1.53484	0.854223	0.507554	0.827068	0.240566	345	75	270
ARL10	1.48412	1.05244	2.09287	0.0243596	1.21688	0.824523	1.79593	0.322966	0.569833	0.451128	0.698113	345	124	221
ARL11	1.48797	1.02347	2.16328	0.0373931	1.32581	0.895664	1.96253	0.158739	0.532239	0.706767	0.396226	345	222	123
ARL13A	1.33908	0.921589	1.94571	0.125613	1.33794	0.905724	1.97641	0.143598	0.518105	0.293233	0.778302	345	86	259
ARL13B	0.807543	0.510798	1.27668	0.360341	0.629621	0.384205	1.0318	0.0663959	0.497943	0.842105	0.226415	345	70	275
ARL14	0.890036	0.628624	1.26016	0.511434	0.87571	0.603451	1.2708	0.484819	0.503547	0.609023	0.45283	345	149	196
ARL15	1.44786	1.01398	2.06739	0.0417156	1.2862	0.874847	1.89098	0.200547	0.504114	0.353383	0.740566	345	102	243
ARL16	0.849722	0.603703	1.196	0.350443	0.714636	0.498944	1.02357	0.0668223	0.497021	0.556391	0.518868	345	170	175
ARL17A	0.884359	0.627377	1.2466	0.482939	0.791892	0.553199	1.13357	0.20234	0.513442	0.571429	0.509434	345	166	179
ARL17B	0.928067	0.658223	1.30854	0.6702	0.861413	0.603973	1.22859	0.410208	0.493332	0.451128	0.59434	345	200	145
ARL2	1.24186	0.879789	1.75293	0.218063	1.31516	0.901282	1.9191	0.155347	0.523833	0.43609	0.650943	345	132	213
ARL2BP	0.910101	0.587614	1.40957	0.673008	0.842025	0.501793	1.41295	0.515004	0.474642	0.819549	0.212264	345	70	275
ARL3	1.39976	0.960042	2.04087	0.0804626	1.50457	1.01202	2.23684	0.043485	0.50493	0.714286	0.34434	345	234	111
ARL4A	0.873234	0.618486	1.23291	0.44116	0.804152	0.559241	1.15632	0.239512	0.548163	0.43609	0.665094	345	217	128
ARL4C	1.64716	1.12927	2.40256	0.00956494	1.65507	1.10778	2.47273	0.0139069	0.518336	0.714286	0.396226	345	223	122
ARL4D	1.5053	1.06204	2.13355	0.0215497	1.34905	0.907915	2.00453	0.138383	0.550255	0.593985	0.509434	345	183	162
ARL5A	0.779944	0.462231	1.31604	0.351796	0.66838	0.383416	1.16514	0.155336	0.494609	0.12782	0.924528	345	313	32
ARL5B	1.24569	0.86741	1.78893	0.234175	1.64333	1.09184	2.47338	0.0172578	0.507803	0.669173	0.400943	345	216	129
ARL5C	0.792246	0.541833	1.15839	0.229581	0.783247	0.523259	1.17241	0.235198	0.512945	0.729323	0.339623	345	109	236
ARL6	0.920089	0.625266	1.35393	0.672613	1.0553	0.691362	1.61082	0.803014	0.508902	0.744361	0.311321	345	101	244
ARL6IP1	0.791741	0.444548	1.41009	0.427787	0.990025	0.527357	1.85861	0.975113	0.512874	0.105263	0.948113	345	321	24
ARL6IP4	0.909561	0.61551	1.34409	0.634244	0.848241	0.555332	1.29565	0.446331	0.518017	0.75188	0.316038	345	101	244
ARL6IP5	0.841517	0.584785	1.21096	0.352793	0.813318	0.532884	1.24133	0.338142	0.508086	0.330827	0.75	345	249	96
ARL6IP6	0.886795	0.585911	1.34219	0.569925	0.913216	0.58352	1.42919	0.691174	0.528621	0.233083	0.858491	345	285	60
ARL8A	0.703911	0.500094	0.990796	0.0441167	0.746826	0.519515	1.0736	0.114917	0.533657	0.458647	0.632075	345	207	138
ARL8B	1.55999	1.09702	2.21834	0.0133068	1.57154	1.07013	2.30789	0.0211283	0.537842	0.37594	0.721698	345	109	236
ARL9	1.49337	1.05109	2.12174	0.0252174	1.49732	1.01528	2.20823	0.0417034	0.551408	0.62406	0.495283	345	190	155
ARMC1	1.17634	0.823273	1.68082	0.372422	1.42815	0.990803	2.05855	0.056077	0.520854	0.646617	0.415094	345	210	135
ARMC10	0.842717	0.576234	1.23243	0.377584	0.876617	0.589124	1.3044	0.51607	0.504291	0.729323	0.334906	345	108	237
ARMC2	0.743643	0.484261	1.14196	0.175924	0.615877	0.390347	0.971712	0.0372239	0.52057	0.81203	0.264151	345	82	263
ARMC3	1.39103	0.961694	2.01203	0.0796779	1.50499	1.00776	2.24756	0.0457433	0.534438	0.691729	0.429245	345	213	132
ARMC4	0.889753	0.450767	1.75625	0.736352	1.25305	0.591218	2.65575	0.556131	0.478047	0.93985	0.0754717	345	25	320
ARMC5	0.719748	0.498664	1.03885	0.0790217	0.848885	0.580628	1.24108	0.397875	0.537984	0.691729	0.40566	345	128	217
ARMC6	1.27919	0.889036	1.84057	0.184712	1.2319	0.835676	1.81599	0.292194	0.499149	0.330827	0.740566	345	99	246
ARMC7	0.589057	0.413033	0.840097	0.0034785	0.634737	0.426724	0.944148	0.0248552	0.567066	0.368421	0.754717	345	245	100
ARMC8	1.08638	0.742613	1.58927	0.669502	1.15293	0.778718	1.70698	0.477221	0.52206	0.721805	0.34434	345	235	110
ARMC9	1.52725	1.06811	2.18374	0.02028	1.23	0.817962	1.84958	0.319947	0.556214	0.654135	0.462264	345	201	144
ARMCX1	1.71382	1.20877	2.4299	0.00249123	1.42671	0.937605	2.17095	0.0970829	0.587069	0.609023	0.537736	345	179	166
ARMCX2	1.7989	1.2777	2.53272	0.000768486	1.51579	1.01754	2.25801	0.0408098	0.605511	0.541353	0.646226	345	147	198
ARMCX3	1.45678	1.02823	2.06392	0.0342942	1.27244	0.87535	1.84967	0.2068	0.572493	0.406015	0.731132	345	111	234
ARMCX5	0.910388	0.647197	1.28061	0.589699	0.941885	0.656062	1.35223	0.745561	0.499468	0.496241	0.561321	345	187	158
ARMCX6	1.23064	0.871493	1.7378	0.238502	1.36016	0.934982	1.9787	0.107739	0.528727	0.421053	0.660377	345	128	217
ARMS2	1.29053	0.917557	1.81512	0.142766	1.17239	0.826352	1.66334	0.372819	0.539172	0.488722	0.613208	345	147	198
ARNT	1.41404	0.957396	2.08848	0.0816562	1.52019	0.995937	2.32039	0.0522465	0.544262	0.744361	0.363208	345	234	111
ARNT2	1.28426	0.882341	1.86927	0.191433	1.21565	0.803246	1.83979	0.355663	0.535785	0.706767	0.396226	345	222	123
ARNTL	0.994669	0.706297	1.40078	0.97559	1.00009	0.700031	1.42877	0.999597	0.494503	0.511278	0.528302	345	168	177
ARNTL2	0.724769	0.509836	1.03031	0.0728795	0.763494	0.518501	1.12425	0.171691	0.53465	0.383459	0.693396	345	230	115
ARPC1A	1.37123	0.97291	1.93263	0.071371	1.37129	0.95501	1.96903	0.0871581	0.521847	0.43609	0.646226	345	133	212
ARPC1B	2.00604	1.108	3.63197	0.0215295	1.79402	0.976977	3.29435	0.0594504	0.507625	0.909774	0.207547	345	289	56
ARPC2	0.921899	0.655908	1.29576	0.639638	0.874648	0.610318	1.25346	0.465693	0.527309	0.526316	0.580189	345	187	158
ARPC3	0.762965	0.536399	1.08523	0.132329	0.708922	0.490725	1.02414	0.0668199	0.554334	0.383459	0.801887	345	253	92
ARPC4	0.732769	0.506725	1.05965	0.0985107	0.877115	0.59593	1.29097	0.506129	0.517059	0.699248	0.382075	345	122	223
ARPC5	0.746485	0.527656	1.05607	0.0985794	0.718269	0.498817	1.03427	0.0752655	0.571393	0.413534	0.740566	345	236	109
ARPC5L	0.676381	0.454311	1.007	0.0541547	0.659415	0.436492	0.996188	0.0479166	0.551532	0.766917	0.34434	345	105	240
ARPM1	1.50108	1.03771	2.17135	0.0310441	1.54261	1.03524	2.29863	0.0331568	0.545148	0.691729	0.438679	345	211	134
ARPP19	1.06821	0.759888	1.50165	0.704125	1.20864	0.833101	1.75347	0.318208	0.46003	0.503759	0.518868	345	177	168
ARPP21	1.6795	0.23395	12.0569	0.606165	1.70088	0.229067	12.6295	0.60359	0.452334	1	0.00471698	345	2	343
ARR3	0.835038	0.560795	1.24339	0.374802	0.719817	0.472168	1.09736	0.126481	0.490655	0.766917	0.268868	345	89	256
ARRB1	0.884927	0.622785	1.25741	0.495208	0.984773	0.677506	1.43139	0.935907	0.498315	0.383459	0.660377	345	223	122
ARRB2	1.75965	1.02617	3.01739	0.0399887	2.07158	1.16019	3.6989	0.0138048	0.528763	0.112782	0.957547	345	24	321
ARRDC1	0.658314	0.467719	0.926575	0.0165191	0.585602	0.398284	0.861017	0.00651196	0.550007	0.541353	0.556604	345	180	165
ARRDC2	1.1956	0.846112	1.68946	0.311197	0.962487	0.669582	1.38352	0.836385	0.534331	0.413534	0.688679	345	121	224
ARRDC3	1.4456	1.02618	2.03646	0.0350508	1.50917	1.04063	2.18868	0.030011	0.582742	0.443609	0.688679	345	125	220
ARRDC4	1.79275	1.15807	2.77526	0.00884006	1.96048	1.23866	3.10293	0.00405853	0.562314	0.81203	0.334906	345	249	96
ARRDC5	2.01024	1.28068	3.15542	0.00240216	1.94645	1.16199	3.26052	0.0113949	0.532079	0.172932	0.915094	345	41	304
ARSA	0.76864	0.544448	1.08515	0.134778	0.715318	0.496652	1.03026	0.0718892	0.497198	0.571429	0.495283	345	163	182
ARSB	1.69783	1.20559	2.39104	0.00244346	1.60071	1.10804	2.31244	0.0121906	0.551532	0.481203	0.660377	345	136	209
ARSD	0.885918	0.629406	1.24697	0.487372	0.891314	0.621279	1.27872	0.532083	0.53802	0.466165	0.622642	345	204	141
ARSE	1.53081	0.98239	2.3854	0.0599094	1.70893	1.05701	2.7629	0.028803	0.490531	0.804511	0.254717	345	265	80
ARSF	0.712144	0.31353	1.61755	0.417347	0.822448	0.320425	2.11101	0.684427	0.479235	0.962406	0.0613208	345	19	326
ARSG	1.52521	1.07845	2.15704	0.0169857	1.53218	1.04374	2.24919	0.0293665	0.581182	0.593985	0.584906	345	167	178
ARSH	0.747924	0.531264	1.05294	0.0960429	0.839757	0.588257	1.19878	0.336232	0.542116	0.466165	0.632075	345	206	139
ARSI	1.51657	1.06706	2.15543	0.0202412	1.65817	1.14172	2.40824	0.00790683	0.541424	0.383459	0.745283	345	105	240
ARSJ	0.946613	0.672771	1.33192	0.752838	0.924167	0.637014	1.34076	0.677855	0.484643	0.503759	0.514151	345	176	169
ARSK	2.13511	1.41242	3.22759	0.000320888	2.24158	1.42595	3.52375	0.000469747	0.557278	0.218045	0.900943	345	50	295
ART1	1.50255	1.06312	2.12361	0.0210702	1.67347	1.1503	2.43457	0.00710129	0.529898	0.413534	0.688679	345	121	224
ART3	1.57287	1.04647	2.36407	0.0293731	1.57278	0.998771	2.47668	0.0506238	0.528834	0.225564	0.867925	345	58	287
ART4	1.56062	1.07412	2.26748	0.0195385	1.39902	0.9248	2.11641	0.111878	0.5643	0.706767	0.410377	345	219	126
ART5	1.63871	1.13254	2.37109	0.00878588	1.71721	1.14946	2.56537	0.0082878	0.544226	0.684211	0.443396	345	209	136
ARTN	1.1025	0.7624	1.59432	0.604107	0.891853	0.603126	1.3188	0.56633	0.501454	0.691729	0.377358	345	224	121
ARV1	1.34619	0.955705	1.89623	0.0889866	1.29707	0.894164	1.88154	0.170519	0.512271	0.473684	0.613208	345	145	200
ARVCF	1.32823	0.733615	2.40481	0.348661	1.31127	0.713543	2.40972	0.382737	0.510853	0.909774	0.150943	345	301	44
ARX	0.802402	0.547204	1.17662	0.259659	0.653664	0.434393	0.983617	0.0414311	0.504362	0.736842	0.334906	345	107	238
AS3MT	1.49443	1.0487	2.12962	0.0262106	1.28162	0.865704	1.89736	0.215148	0.567315	0.631579	0.514151	345	187	158
ASAH1	0.848672	0.59122	1.21823	0.37365	0.898074	0.605186	1.33271	0.593476	0.524542	0.676692	0.415094	345	132	213
ASAH2	0.734089	0.498501	1.08101	0.117474	0.894074	0.589533	1.35594	0.598232	0.526316	0.270677	0.816038	345	271	74
ASAH2B	1.14244	0.811	1.60933	0.446236	1.14908	0.795342	1.66016	0.45916	0.502607	0.511278	0.566038	345	160	185
ASAM	1.72397	1.20913	2.45803	0.00261939	1.51462	1.02646	2.23493	0.0364811	0.580082	0.639098	0.509434	345	189	156
ASAP1	1.5138	1.06822	2.14524	0.0197552	1.20101	0.807939	1.78533	0.365163	0.553164	0.609023	0.514151	345	184	161
ASAP1IT1	1.17563	0.831697	1.6618	0.359496	0.93003	0.634157	1.36395	0.710426	0.501011	0.413534	0.636792	345	132	213
ASAP2	1.62731	0.964545	2.74549	0.068048	1.61331	0.927915	2.80498	0.0901036	0.508937	0.879699	0.193396	345	288	57
ASAP3	1.99275	1.26024	3.15102	0.0031845	1.78571	1.08499	2.93898	0.0225572	0.580189	0.834586	0.334906	345	252	93
ASB1	1.19018	0.834519	1.69741	0.336444	1.1156	0.742065	1.67715	0.598982	0.534579	0.360902	0.712264	345	109	236
ASB10	1.13663	0.158635	8.14401	0.898571	1.30408	0.177916	9.55862	0.79391	0.495992	1	0.00471698	345	2	343
ASB11	0.445512	0.109933	1.80548	0.257449	0.309436	0.073194	1.30817	0.110769	0.462051	0.992481	0.0471698	345	12	333
ASB12	1.52366	1.00719	2.30496	0.0461667	1.61754	1.04744	2.49794	0.0300825	0.541673	0.781955	0.339623	345	244	101
ASB13	0.567063	0.392362	0.819551	0.00253603	0.638615	0.432785	0.942336	0.0238728	0.571961	0.699248	0.490566	345	145	200
ASB14	1.38167	0.980963	1.94606	0.0643165	1.68272	1.15076	2.46061	0.00726985	0.526174	0.548872	0.566038	345	165	180
ASB15	0.485249	0.119993	1.96234	0.310431	0.427625	0.102827	1.77836	0.242702	0.482693	0.992481	0.0377358	345	10	335
ASB16	1.42339	0.979329	2.06881	0.0642439	1.49463	0.988504	2.25989	0.0567608	0.520836	0.293233	0.801887	345	81	264
ASB17	0.842884	0.483982	1.46793	0.545937	0.99314	0.548754	1.7974	0.981856	0.49578	0.902256	0.122642	345	40	305
ASB18	0.813882	0.482183	1.37376	0.440679	0.810116	0.462475	1.41908	0.461584	0.487214	0.887218	0.15566	345	49	296
ASB2	1.76542	1.21334	2.56869	0.00297188	1.69418	1.07346	2.67383	0.0235462	0.543481	0.293233	0.825472	345	76	269
ASB3	2.59611	1.06187	6.34708	0.0364765	2.18953	0.82661	5.79965	0.114836	0.483579	0.962406	0.0943396	345	320	25
ASB4	1.26945	0.90158	1.78743	0.171769	0.971958	0.662337	1.42632	0.884437	0.527575	0.473684	0.608491	345	146	199
ASB5	1.74203	1.1806	2.57044	0.00516771	1.66318	1.10076	2.51296	0.0156992	0.555877	0.736842	0.382075	345	229	116
ASB6	0.53865	0.370527	0.783055	0.00119079	0.401106	0.265548	0.605866	1.41656e-05	0.541389	0.300752	0.811321	345	266	79
ASB7	1.03625	0.735433	1.46011	0.838725	1.11854	0.776182	1.61189	0.547918	0.501348	0.443609	0.599057	345	144	201
ASB8	1.26894	0.769455	2.09268	0.350724	1.34096	0.766048	2.34735	0.304408	0.491204	0.135338	0.90566	345	38	307
ASB9	1.36965	0.97327	1.92747	0.0711474	1.21488	0.83405	1.76959	0.310428	0.53802	0.526316	0.570755	345	161	184
ASCC1	1.65582	1.03835	2.64048	0.0341722	1.57895	0.966099	2.58057	0.0684	0.519223	0.842105	0.259434	345	269	76
ASCC2	0.816766	0.573565	1.16309	0.26175	0.720784	0.497459	1.04437	0.083537	0.510675	0.37594	0.698113	345	232	113
ASCC3	0.816811	0.578627	1.15304	0.249987	0.790352	0.545324	1.14548	0.214006	0.49014	0.43609	0.608491	345	205	140
ASCL1	1.39483	0.969473	2.0068	0.072985	1.2669	0.863796	1.85812	0.226024	0.532345	0.676692	0.410377	345	215	130
ASCL2	0.662416	0.446481	0.982785	0.040733	0.688828	0.451173	1.05167	0.0842361	0.565399	0.759398	0.382075	345	114	231
ASCL3	0.945939	0.669611	1.3363	0.752535	0.790731	0.542114	1.15337	0.222801	0.498971	0.593985	0.438679	345	148	197
ASCL4	1.31672	0.790562	2.19307	0.290477	1.22829	0.701309	2.15124	0.472073	0.46957	0.879699	0.122642	345	43	302
ASF1A	1.80885	1.2725	2.57126	0.000957001	1.58153	1.09635	2.28142	0.0142062	0.528125	0.383459	0.740566	345	106	239
ASF1B	0.582103	0.413969	0.818526	0.00186187	0.698199	0.463831	1.05099	0.0851377	0.584551	0.526316	0.632075	345	198	147
ASFMR1	1.25477	0.84939	1.85361	0.254285	1.35202	0.900264	2.03046	0.146062	0.509611	0.255639	0.816038	345	73	272
ASGR1	1.37593	0.931134	2.03319	0.109195	1.2371	0.811	1.88708	0.323345	0.524365	0.255639	0.820755	345	72	273
ASGR2	1.73453	1.1633	2.58625	0.00689009	1.65488	1.09308	2.50542	0.0172868	0.606558	0.759398	0.424528	345	223	122
ASH1L	1.28954	0.904302	1.83888	0.1602	1.23596	0.836368	1.82647	0.287693	0.52816	0.360902	0.726415	345	106	239
ASH2L	0.783711	0.540936	1.13545	0.197599	1.16219	0.773212	1.74684	0.469739	0.543233	0.706767	0.386792	345	122	223
ASIP	1.97191	1.0536	3.69063	0.0337351	2.1572	1.10645	4.20579	0.0240122	0.525216	0.917293	0.174528	345	297	48
ASL	0.704983	0.485623	1.02343	0.0660364	0.703516	0.475113	1.04172	0.0791085	0.539828	0.308271	0.787736	345	260	85
ASMT	0.830826	0.589	1.17194	0.290979	0.76647	0.535472	1.09712	0.146101	0.512324	0.571429	0.490566	345	162	183
ASMTL	1.1213	0.792458	1.58659	0.517982	1.26514	0.860062	1.861	0.232333	0.517627	0.593985	0.5	345	185	160
ASNA1	0.796026	0.564925	1.12167	0.192312	0.887417	0.600806	1.31075	0.548381	0.525784	0.56391	0.523585	345	170	175
ASNS	0.843683	0.594193	1.19793	0.341957	0.850768	0.584622	1.23808	0.398499	0.487445	0.62406	0.443396	345	145	200
ASNSD1	0.92507	0.657867	1.3008	0.654268	1.02843	0.713096	1.48319	0.880741	0.49617	0.526316	0.54717	345	180	165
ASPA	2.16022	1.45084	3.21646	0.000149288	1.82853	1.19037	2.80881	0.00585738	0.594233	0.759398	0.448113	345	218	127
ASPDH	1.10909	0.781702	1.57359	0.561839	1.02986	0.71459	1.48424	0.874606	0.524276	0.616541	0.457547	345	197	148
ASPG	1.25309	0.891609	1.76113	0.193851	1.36388	0.950033	1.958	0.0925451	0.522645	0.488722	0.589623	345	152	193
ASPH	1.53529	0.953852	2.47115	0.0774955	1.85405	1.11708	3.07721	0.0169278	0.529259	0.849624	0.240566	345	274	71
ASPHD1	1.06288	0.754629	1.49705	0.727108	0.990226	0.686507	1.42831	0.958087	0.501029	0.556391	0.504717	345	179	166
ASPHD2	0.717448	0.50956	1.01015	0.0571555	0.771083	0.53725	1.10669	0.158516	0.538552	0.458647	0.65566	345	212	133
ASPM	0.708156	0.498097	1.0068	0.0545811	0.725454	0.49445	1.06438	0.100806	0.52284	0.383459	0.712264	345	234	111
ASPN	1.81064	1.28657	2.5482	0.000660951	1.88522	1.26464	2.81033	0.00185494	0.575826	0.526316	0.632075	345	148	197
ASPRV1	0.947517	0.660312	1.35964	0.769839	1.14064	0.783204	1.66121	0.492695	0.49312	0.669173	0.372642	345	124	221
ASPSCR1	0.728102	0.51715	1.0251	0.0690764	0.6972	0.480091	1.01249	0.0581258	0.540857	0.466165	0.650943	345	210	135
ASRGL1	0.809078	0.545642	1.1997	0.291843	0.739637	0.486566	1.12433	0.158096	0.517378	0.759398	0.34434	345	106	239
ASS1	0.614681	0.410548	0.920313	0.018117	0.580955	0.376034	0.897549	0.0144061	0.520925	0.774436	0.325472	345	100	245
ASTE1	1.32865	0.894388	1.97377	0.159359	1.30267	0.858831	1.97588	0.213503	0.501951	0.75188	0.301887	345	248	97
ASTL	1.02657	0.7019	1.50142	0.892458	1.23346	0.829673	1.83376	0.299706	0.499574	0.721805	0.334906	345	237	108
ASTN1	2.02093	1.382	2.95527	0.000285047	1.66867	1.08633	2.5632	0.0193844	0.589162	0.721805	0.481132	345	206	139
ASTN2	1.22713	0.869362	1.73212	0.244472	1.38572	0.947277	2.02709	0.0927864	0.515286	0.421053	0.65566	345	129	216
ASXL1	1.39145	0.957695	2.02165	0.083064	1.18327	0.754276	1.85625	0.463871	0.548163	0.706767	0.400943	345	221	124
ASXL2	1.25823	0.89328	1.77228	0.188758	1.22249	0.85739	1.74306	0.267044	0.521528	0.443609	0.646226	345	134	211
ASXL3	1.46343	1.04081	2.05766	0.028525	1.24461	0.863186	1.79457	0.241205	0.53309	0.481203	0.608491	345	147	198
ASZ1									0.472691	0	1	345	345	0
ATAD1	1.43867	0.977465	2.11749	0.0651272	1.30294	0.86282	1.96757	0.208268	0.508618	0.736842	0.367925	345	232	113
ATAD2	0.655057	0.449033	0.955607	0.0281175	0.56594	0.371143	0.862977	0.0081795	0.54646	0.293233	0.820755	345	269	76
ATAD2B	1.3	0.915658	1.84567	0.142317	1.17417	0.798815	1.72589	0.413939	0.529579	0.383459	0.693396	345	116	229
ATAD3A	1.19719	0.851515	1.68318	0.300525	1.16146	0.808945	1.66759	0.417329	0.492659	0.473684	0.589623	345	150	195
ATAD3B	0.783981	0.557491	1.10249	0.161791	0.729803	0.500178	1.06485	0.102254	0.537346	0.473684	0.632075	345	205	140
ATAD3C	1.08257	0.765545	1.53089	0.653588	1.02784	0.715372	1.47679	0.881943	0.493935	0.406015	0.632075	345	132	213
ATAD5	0.813827	0.5589	1.18503	0.282605	0.706235	0.465284	1.07197	0.10235	0.538232	0.300752	0.79717	345	263	82
ATCAY	1.65094	1.16273	2.34415	0.00506518	1.56546	1.06036	2.31118	0.0241445	0.564974	0.383459	0.75	345	104	241
ATE1	1.08397	0.770252	1.52545	0.643711	1.35409	0.941721	1.94704	0.101858	0.498227	0.466165	0.589623	345	149	196
ATF1	0.739059	0.512333	1.06612	0.105775	0.710495	0.480688	1.05017	0.0864499	0.540644	0.691729	0.438679	345	135	210
ATF2	1.34005	0.94652	1.89719	0.0989195	1.69401	1.16689	2.45926	0.00558036	0.531742	0.398496	0.698113	345	117	228
ATF3	1.849	1.04311	3.2775	0.0353362	1.65039	0.921213	2.95673	0.09216	0.545077	0.902256	0.198113	345	290	55
ATF4	1.0268	0.728196	1.44786	0.880081	0.803206	0.554369	1.16374	0.246697	0.506242	0.473684	0.575472	345	153	192
ATF5	0.587028	0.352694	0.977055	0.0404363	0.720906	0.401192	1.2954	0.27378	0.535537	0.879699	0.221698	345	64	281
ATF6	1.20864	0.8575	1.70357	0.279215	1.52408	1.05331	2.20527	0.0253866	0.503937	0.56391	0.504717	345	180	165
ATF6B	0.807612	0.572952	1.13838	0.222472	0.783487	0.529409	1.1595	0.222464	0.520819	0.443609	0.636792	345	210	135
ATF7	2.21322	1.52084	3.22081	3.32177e-05	2.40945	1.58701	3.6581	3.66095e-05	0.583168	0.293233	0.882075	345	64	281
ATF7IP	1.51173	1.07585	2.1242	0.0172529	1.37129	0.949947	1.97951	0.0918326	0.557349	0.503759	0.632075	345	145	200
ATF7IP2	1.48332	0.920257	2.39091	0.105495	1.42672	0.863217	2.35808	0.16568	0.504185	0.849624	0.207547	345	281	64
ATG10	0.916694	0.648138	1.29653	0.622884	1.03402	0.71585	1.49359	0.858502	0.498617	0.601504	0.471698	345	154	191
ATG12	1.43812	0.999133	2.06998	0.0505483	1.43302	0.969013	2.1192	0.0715007	0.517733	0.669173	0.415094	345	213	132
ATG16L1	0.723643	0.504854	1.03725	0.0782604	0.787656	0.534641	1.16041	0.227274	0.52206	0.345865	0.731132	345	243	102
ATG16L2	0.843693	0.599845	1.18667	0.328779	0.726484	0.508567	1.03778	0.0790579	0.494325	0.526316	0.514151	345	173	172
ATG2A	0.680138	0.482272	0.959185	0.0279822	0.781376	0.538608	1.13357	0.193756	0.49812	0.443609	0.613208	345	205	140
ATG2B	1.56971	1.08864	2.26336	0.0157431	1.3431	0.876627	2.05781	0.17539	0.572244	0.684211	0.443396	345	209	136
ATG3	0.79363	0.544407	1.15695	0.229402	0.82918	0.555784	1.23706	0.358769	0.539438	0.293233	0.792453	345	263	82
ATG4A	0.636606	0.443981	0.912803	0.0140426	0.605213	0.413104	0.886661	0.009956	0.537842	0.669173	0.471698	345	145	200
ATG4B	1.49112	0.975809	2.27855	0.064781	1.24882	0.778511	2.00326	0.356756	0.505426	0.203008	0.867925	345	55	290
ATG4C	0.921373	0.645342	1.31547	0.652174	1.051	0.715929	1.54288	0.799552	0.486807	0.360902	0.669811	345	228	117
ATG4D	0.485328	0.336303	0.700388	0.000112091	0.477866	0.317037	0.72028	0.000419825	0.561817	0.323308	0.816038	345	264	81
ATG5	1.29559	0.921531	1.82149	0.136267	1.27804	0.877964	1.86043	0.200335	0.509824	0.496241	0.580189	345	155	190
ATG7	1.42893	0.985294	2.07232	0.0598562	1.48528	1.00945	2.1854	0.0446735	0.56281	0.699248	0.424528	345	215	130
ATG9A	0.587002	0.377041	0.913883	0.0183403	0.699327	0.436969	1.11921	0.136073	0.515392	0.827068	0.273585	345	82	263
ATG9B	0.944094	0.667065	1.33617	0.745462	0.86919	0.60554	1.24763	0.447126	0.504752	0.413534	0.665094	345	220	125
ATHL1	0.633843	0.388938	1.03296	0.067276	0.545981	0.322465	0.924426	0.0242939	0.516474	0.150376	0.915094	345	308	37
ATIC	0.637402	0.445634	0.911693	0.0136534	0.694874	0.46383	1.041	0.077546	0.563874	0.360902	0.801887	345	256	89
ATL1	1.46681	1.04084	2.06713	0.0286245	1.40395	0.955595	2.06266	0.0838883	0.554937	0.43609	0.693396	345	123	222
ATL2	1.51142	1.07341	2.12816	0.0179949	1.5581	1.06817	2.27275	0.0213175	0.51236	0.451128	0.641509	345	136	209
ATL3	1.45683	1.03565	2.04929	0.0306842	1.73608	1.20606	2.49903	0.00299718	0.556994	0.466165	0.693396	345	127	218
ATM	1.09949	0.748389	1.6153	0.628927	0.924273	0.5944	1.43722	0.726623	0.523195	0.270677	0.792453	345	80	265
ATMIN	1.41317	0.761946	2.62098	0.272506	1.18112	0.624116	2.23523	0.609018	0.502554	0.917293	0.136792	345	305	40
ATN1	1.53963	1.01938	2.32538	0.0402459	1.62266	1.04884	2.51041	0.0296954	0.543694	0.781955	0.334906	345	245	100
ATOH1	1.74916	1.04403	2.93053	0.0337034	2.02538	1.15312	3.55744	0.0140613	0.516314	0.87218	0.235849	345	278	67
ATOH7	0.837797	0.576396	1.21775	0.35366	0.907279	0.614688	1.33914	0.624241	0.526156	0.714286	0.353774	345	114	231
ATOH8	1.44438	1.02739	2.03061	0.0343933	1.23099	0.850904	1.78087	0.270015	0.540325	0.511278	0.622642	345	148	197
ATOX1	0.816987	0.523896	1.27404	0.372596	0.825202	0.520561	1.30812	0.41374	0.486133	0.827068	0.221698	345	71	274
ATP10A	1.29677	0.916301	1.83521	0.142472	1.16873	0.784954	1.74014	0.442648	0.516279	0.601504	0.466981	345	193	152
ATP10B	1.08862	0.773136	1.53284	0.626744	1.12384	0.775728	1.62816	0.53706	0.471131	0.503759	0.514151	345	170	175
ATP10D	1.60689	1.10111	2.345	0.0139177	1.94124	1.27777	2.94921	0.00187909	0.526068	0.285714	0.811321	345	78	267
ATP11A	0.683014	0.479295	0.973322	0.0348934	0.496673	0.330049	0.747415	0.0007903	0.532274	0.646617	0.476415	345	149	196
ATP11B	1.40626	0.944519	2.09373	0.0931749	1.42238	0.93536	2.16298	0.0994562	0.509363	0.240602	0.849057	345	64	281
ATP11C	1.59443	1.09398	2.32382	0.0152111	1.65705	1.10365	2.48793	0.0148684	0.552986	0.285714	0.834906	345	73	272
ATP12A	0.636819	0.405769	0.999433	0.0497123	0.624142	0.381426	1.02131	0.0606488	0.519223	0.834586	0.264151	345	79	266
ATP13A1	1.43484	0.837665	2.45775	0.188552	1.51584	0.848048	2.70947	0.160392	0.497234	0.112782	0.95283	345	25	320
ATP13A2	1.06332	0.752806	1.5019	0.727515	1.13427	0.787821	1.63308	0.498077	0.489147	0.428571	0.622642	345	137	208
ATP13A3	0.825559	0.586615	1.16183	0.271519	0.726839	0.495494	1.0662	0.102664	0.506207	0.541353	0.523585	345	173	172
ATP13A4	1.23169	0.853942	1.77653	0.264819	1.09527	0.737092	1.62751	0.652447	0.522308	0.684211	0.386792	345	221	124
ATP13A5	1.10502	0.663709	1.83976	0.70102	1.04034	0.613651	1.76372	0.883262	0.484501	0.879699	0.132075	345	45	300
ATP1A1	0.673355	0.4653	0.97444	0.0359693	0.659635	0.440893	0.986903	0.0429601	0.529401	0.699248	0.400943	345	126	219
ATP1A2	2.20124	1.35375	3.57927	0.00146731	1.71722	1.01884	2.89434	0.0423535	0.566605	0.857143	0.306604	345	261	84
ATP1A3	1.5628	1.10968	2.20095	0.0105984	1.55491	1.08904	2.22008	0.0151231	0.598489	0.533835	0.641509	345	147	198
ATP1A4	1.15785	0.822582	1.62977	0.400762	1.05206	0.723672	1.52947	0.790354	0.502288	0.548872	0.481132	345	183	162
ATP1B1	1.07347	0.763126	1.51002	0.683848	1.15784	0.809484	1.65612	0.422228	0.476309	0.458647	0.580189	345	150	195
ATP1B2	1.8077	1.24675	2.62103	0.00178741	1.52451	0.994157	2.3378	0.053224	0.578415	0.699248	0.443396	345	211	134
ATP1B3	0.835699	0.582933	1.19807	0.328739	0.845199	0.582419	1.22654	0.376049	0.543233	0.661654	0.433962	345	138	207
ATP1B4	1.00635	0.567279	1.78526	0.982735	0.970556	0.534925	1.76095	0.921675	0.499149	0.909774	0.122642	345	39	306
ATP2A1	0.654391	0.464844	0.92123	0.0150925	0.547577	0.375904	0.79765	0.00170135	0.549103	0.466165	0.665094	345	213	132
ATP2A2	0.624927	0.435316	0.897126	0.0108204	0.563572	0.381307	0.83296	0.00401651	0.539935	0.676692	0.485849	345	147	198
ATP2A3	1.35704	0.850959	2.16411	0.19978	1.3271	0.791739	2.22446	0.282892	0.514612	0.842105	0.226415	345	276	69
ATP2B1	1.80389	1.10867	2.93507	0.0175344	1.77421	1.01849	3.09067	0.0429021	0.513725	0.857143	0.254717	345	272	73
ATP2B2	1.77196	1.25231	2.50725	0.00123607	1.78357	1.21432	2.61966	0.00317775	0.578469	0.578947	0.580189	345	166	179
ATP2B3	1.74963	1.23562	2.47746	0.0016207	1.7117	1.16388	2.51736	0.00631221	0.601167	0.601504	0.580189	345	169	176
ATP2B4	1.78841	1.24664	2.56563	0.00159247	1.87076	1.25779	2.78247	0.00198624	0.556852	0.338346	0.806604	345	86	259
ATP2C1	0.841037	0.576591	1.22677	0.368745	0.73422	0.475705	1.13322	0.162962	0.500213	0.721805	0.316038	345	105	240
ATP2C2	0.770671	0.510307	1.16388	0.215542	0.733617	0.47719	1.12784	0.158038	0.520216	0.789474	0.287736	345	90	255
ATP4A									0.540573	0.451128	0.641509	345	345	0
ATP4B	1.24388	0.845076	1.8309	0.268507	1.19038	0.789972	1.79376	0.404821	0.524507	0.736842	0.339623	345	238	107
ATP5A1	0.70845	0.503804	0.996224	0.0475109	0.894875	0.604731	1.32423	0.578561	0.553199	0.518797	0.599057	345	192	153
ATP5B	0.85638	0.60875	1.20474	0.373291	0.963132	0.652791	1.42101	0.849854	0.551107	0.496241	0.613208	345	198	147
ATP5C1	0.832356	0.590562	1.17315	0.294656	0.923352	0.643954	1.32398	0.664509	0.540786	0.443609	0.650943	345	213	132
ATP5D	0.821499	0.515173	1.30997	0.408875	0.833828	0.50217	1.38453	0.482427	0.493581	0.849624	0.188679	345	61	284
ATP5E	1.00048	0.707291	1.41521	0.997826	0.73064	0.50127	1.06496	0.102565	0.500745	0.421053	0.660377	345	218	127
ATP5EP2	1.35538	0.937398	1.95974	0.106022	1.15615	0.782801	1.70755	0.465864	0.515995	0.691729	0.386792	345	222	123
ATP5F1	0.726435	0.516252	1.02219	0.066651	0.87734	0.605568	1.27108	0.489043	0.541779	0.541353	0.589623	345	187	158
ATP5G1	0.827139	0.577386	1.18492	0.300768	0.922435	0.625735	1.35982	0.683456	0.563165	0.360902	0.764151	345	248	97
ATP5G2	1.35803	0.928702	1.98584	0.11446	1.43861	0.97562	2.12132	0.0664463	0.504008	0.721805	0.334906	345	237	108
ATP5G3	0.756433	0.517473	1.10574	0.14957	0.848354	0.562165	1.28024	0.43345	0.546283	0.285714	0.830189	345	272	73
ATP5H	0.858431	0.598567	1.23111	0.406669	0.966183	0.665125	1.40351	0.856695	0.545326	0.345865	0.754717	345	248	97
ATP5I	0.637753	0.424566	0.957988	0.0302571	0.613079	0.400394	0.938741	0.0243994	0.522556	0.233083	0.863208	345	286	59
ATP5J	0.892812	0.624604	1.27619	0.533932	1.09661	0.743285	1.6179	0.642077	0.553447	0.360902	0.75	345	245	100
ATP5J2	0.775259	0.526714	1.14109	0.196791	0.860891	0.575992	1.28671	0.465072	0.515392	0.744361	0.353774	345	110	235
ATP5L	0.789163	0.561248	1.10963	0.173289	0.821274	0.572697	1.17774	0.284396	0.562136	0.518797	0.632075	345	199	146
ATP5L2	1.14433	0.81448	1.60777	0.437084	1.10427	0.77387	1.57574	0.584526	0.464906	0.503759	0.528302	345	167	178
ATP5O	0.653981	0.397443	1.07611	0.0946625	0.647228	0.374785	1.11772	0.118589	0.527309	0.142857	0.933962	345	313	32
ATP5S	1.0053	0.706858	1.42974	0.976545	0.963965	0.66638	1.39444	0.845524	0.503653	0.616541	0.476415	345	153	192
ATP5SL	1.32155	0.827876	2.10962	0.242652	1.42479	0.866393	2.34307	0.16305	0.495815	0.157895	0.896226	345	43	302
ATP6AP1	0.694094	0.476158	1.01178	0.0575562	0.685075	0.449558	1.04397	0.0784514	0.509611	0.293233	0.792453	345	263	82
ATP6AP1L	0.700768	0.32715	1.50107	0.360251	0.659199	0.301643	1.44059	0.296133	0.480618	0.954887	0.0849057	345	25	320
ATP6AP2	1.65476	1.05499	2.59551	0.0283032	1.6724	0.997339	2.80439	0.0511929	0.514506	0.172932	0.882075	345	48	297
ATP6V0A1	1.39843	0.99499	1.96545	0.0534781	1.36299	0.932509	1.99218	0.109791	0.53348	0.518797	0.622642	345	149	196
ATP6V0A2	0.54542	0.223006	1.33397	0.184021	0.506734	0.203699	1.26059	0.143761	0.517449	0.969925	0.103774	345	27	318
ATP6V0A4	1.22765	0.852992	1.76686	0.269573	1.05836	0.699036	1.60239	0.788672	0.507873	0.676692	0.377358	345	222	123
ATP6V0B	0.806724	0.573528	1.13474	0.217269	0.813822	0.567253	1.16757	0.263268	0.521209	0.518797	0.551887	345	182	163
ATP6V0C	0.728209	0.486632	1.08971	0.12302	0.768879	0.500301	1.18164	0.230633	0.525784	0.774436	0.316038	345	98	247
ATP6V0D1	0.686068	0.440466	1.06862	0.0956245	0.6897	0.431844	1.10152	0.119904	0.513832	0.827068	0.240566	345	75	270
ATP6V0D2	1.38888	0.987648	1.9531	0.0589573	1.59425	1.11345	2.28265	0.0108726	0.52284	0.481203	0.617925	345	145	200
ATP6V0E1	0.859141	0.581406	1.26955	0.446032	0.871047	0.578923	1.31058	0.50774	0.490956	0.75188	0.29717	345	97	248
ATP6V0E2	0.776047	0.550787	1.09343	0.147238	0.701204	0.487043	1.00954	0.0562714	0.496666	0.541353	0.5	345	168	177
ATP6V1A	0.736982	0.519774	1.04496	0.0866924	0.78709	0.540952	1.14522	0.210835	0.537842	0.406015	0.716981	345	232	113
ATP6V1B1	1.40502	0.985313	2.00351	0.0603484	1.0417	0.699615	1.55104	0.84059	0.53653	0.360902	0.745283	345	102	243
ATP6V1B2	0.757776	0.499117	1.15048	0.192928	0.976899	0.616252	1.54861	0.920801	0.531919	0.218045	0.863208	345	288	57
ATP6V1C1	1.50963	0.813125	2.80275	0.192007	1.45994	0.768127	2.77482	0.248152	0.514435	0.917293	0.15566	345	301	44
ATP6V1C2	2.28309	0.931895	5.59345	0.0709679	2.11702	0.820994	5.45898	0.120697	0.48248	0.962406	0.0754717	345	324	21
ATP6V1D	1.00784	0.700028	1.45101	0.966483	1.12528	0.767162	1.65056	0.545932	0.527876	0.330827	0.745283	345	248	97
ATP6V1E1	1.43308	0.985782	2.08333	0.0594367	1.25552	0.826759	1.90663	0.285751	0.502766	0.300752	0.768868	345	89	256
ATP6V1E2	0.694112	0.435313	1.10677	0.125076	0.777756	0.476257	1.27012	0.315178	0.534154	0.849624	0.273585	345	79	266
ATP6V1F	1.19076	0.821821	1.72532	0.356119	1.23044	0.835651	1.81174	0.293505	0.495886	0.699248	0.353774	345	230	115
ATP6V1G1	0.723996	0.509874	1.02804	0.0710147	0.558313	0.38345	0.812919	0.00236215	0.545716	0.390977	0.712264	345	233	112
ATP6V1G2	1.61882	1.12365	2.33221	0.00971638	1.53194	1.00809	2.328	0.0457479	0.542595	0.676692	0.419811	345	213	132
ATP6V1G3	0.887951	0.363053	2.17174	0.794532	1.27627	0.505121	3.22469	0.605981	0.495868	0.969925	0.0471698	345	15	330
ATP6V1H	2.58545	1.20685	5.53885	0.0145406	2.85516	1.31143	6.21606	0.00821828	0.533941	0.947368	0.141509	345	308	37
ATP7A	1.39869	0.95329	2.05218	0.0862708	1.4699	0.969019	2.22968	0.0699973	0.525145	0.270677	0.820755	345	74	271
ATP7B	0.696938	0.494161	0.982925	0.039577	0.587899	0.404275	0.854926	0.00542991	0.52777	0.571429	0.528302	345	170	175
ATP8A1	0.950112	0.670799	1.34573	0.773244	0.943708	0.64711	1.37625	0.763437	0.497411	0.609023	0.429245	345	144	201
ATP8A2	1.82581	1.25583	2.65449	0.00161592	1.75427	1.1658	2.63978	0.00702266	0.593754	0.706767	0.45283	345	210	135
ATP8B1	0.871744	0.611635	1.24247	0.447742	0.876719	0.602803	1.2751	0.491202	0.510924	0.368421	0.688679	345	231	114
ATP8B2	1.78439	1.25556	2.53598	0.00124248	1.66201	1.0905	2.53302	0.0181304	0.571641	0.37594	0.778302	345	97	248
ATP8B3	1.25058	0.880005	1.77721	0.212373	0.965359	0.659721	1.41259	0.855963	0.532877	0.62406	0.448113	345	200	145
ATP8B4	1.52348	1.07618	2.15669	0.0175977	1.37558	0.936325	2.0209	0.104219	0.565328	0.601504	0.54717	345	176	169
ATP8B5P	0.809493	0.564709	1.16038	0.250006	0.728637	0.49517	1.07218	0.108203	0.526174	0.345865	0.768868	345	251	94
ATP9A	1.61822	0.984181	2.66072	0.0578129	1.39285	0.782113	2.4805	0.260448	0.52472	0.864662	0.235849	345	277	68
ATP9B	1.27173	0.7165	2.25721	0.41157	1.41662	0.779116	2.57577	0.253565	0.499716	0.902256	0.146226	345	301	44
ATPAF1	0.679399	0.425739	1.08419	0.10502	0.820013	0.503904	1.33442	0.424451	0.484856	0.165414	0.900943	345	303	42
ATPAF2	0.781922	0.552983	1.10564	0.163989	0.785701	0.535434	1.15294	0.217722	0.521031	0.601504	0.476415	345	155	190
ATPBD4	0.937966	0.662599	1.32777	0.717978	0.811259	0.558727	1.17793	0.271633	0.491488	0.406015	0.632075	345	214	131
ATPIF1	0.841308	0.598081	1.18345	0.320946	0.968891	0.66642	1.40865	0.868541	0.536814	0.496241	0.589623	345	193	152
ATR	0.75658	0.536402	1.06714	0.11191	0.614676	0.417349	0.905301	0.0137552	0.494822	0.443609	0.627358	345	208	137
ATRIP	1.39934	0.877723	2.23095	0.157977	1.36219	0.836111	2.21927	0.214534	0.511456	0.842105	0.259434	345	269	76
ATRN	1.8024	1.15797	2.80547	0.00906275	2.05952	1.26673	3.34849	0.00357484	0.540928	0.819549	0.320755	345	253	92
ATRNL1	1.35579	0.959239	1.91628	0.0846664	1.40233	0.954423	2.06045	0.0850052	0.550894	0.413534	0.693396	345	120	225
ATRX	1.38571	0.978752	1.96189	0.0659307	1.46029	0.997666	2.13743	0.051422	0.535218	0.398496	0.70283	345	116	229
ATXN1	1.61173	1.14695	2.26485	0.00596192	1.55204	1.05237	2.28894	0.0265907	0.582884	0.488722	0.679245	345	133	212
ATXN10	0.904722	0.630354	1.29851	0.587062	1.17491	0.799045	1.72757	0.412525	0.510994	0.676692	0.382075	345	125	220
ATXN1L	1.31565	0.90549	1.91161	0.150108	1.12756	0.763425	1.66539	0.546268	0.532097	0.706767	0.396226	345	222	123
ATXN2	1.35878	0.932302	1.98034	0.110661	1.32343	0.879789	1.99077	0.178571	0.553554	0.714286	0.396226	345	223	122
ATXN2L	0.774061	0.550801	1.08782	0.140175	0.719118	0.495305	1.04406	0.0830444	0.494574	0.518797	0.528302	345	177	168
ATXN3	1.83902	1.2339	2.7409	0.00276929	2.05353	1.30608	3.22872	0.00183009	0.5377	0.240602	0.863208	345	61	284
ATXN3L									0.486771	0	1	345	345	0
ATXN7	0.534138	0.269842	1.0573	0.0718565	0.544249	0.269513	1.09905	0.0897766	0.516031	0.93985	0.113208	345	33	312
ATXN7L1	1.23579	0.879132	1.73714	0.223026	1.28361	0.880034	1.87226	0.194834	0.516917	0.503759	0.570755	345	158	187
ATXN7L2	0.615793	0.377548	1.00438	0.0520811	0.591394	0.348035	1.00492	0.0521589	0.517662	0.150376	0.924528	345	310	35
ATXN7L3	0.592184	0.409037	0.857337	0.00551503	0.572636	0.387814	0.845539	0.0050512	0.551461	0.315789	0.801887	345	262	83
ATXN7L3B	0.674838	0.427012	1.06649	0.0921302	0.573713	0.348329	0.944932	0.0290762	0.513442	0.842105	0.245283	345	74	271
ATXN8OS									0.48287	0	1	345	345	0
AUH	0.572075	0.315806	1.0363	0.0654248	0.544106	0.284711	1.03983	0.0655089	0.500071	0.917293	0.165094	345	47	298
AUP1	0.778102	0.552212	1.0964	0.151578	0.758244	0.519443	1.10683	0.151563	0.530004	0.466165	0.632075	345	206	139
AURKA	0.53989	0.313788	0.928912	0.0259936	0.412577	0.206571	0.824029	0.0121303	0.519187	0.120301	0.957547	345	321	24
AURKAIP1	0.771198	0.51328	1.15872	0.211019	0.85006	0.545815	1.3239	0.472342	0.522769	0.781955	0.301887	345	94	251
AURKAPS1	0.656813	0.463255	0.931245	0.0182815	0.592889	0.407668	0.862264	0.00622987	0.546141	0.616541	0.528302	345	164	181
AURKB	0.650486	0.441825	0.957692	0.029331	0.589842	0.374142	0.929896	0.0230322	0.536991	0.270677	0.84434	345	277	68
AURKC	0.877606	0.61742	1.24744	0.466806	0.808451	0.558754	1.16973	0.259249	0.493102	0.631579	0.419811	345	139	206
AUTS2	1.36004	0.963166	1.92046	0.0806746	1.23267	0.858337	1.77026	0.257315	0.547454	0.421053	0.70283	345	119	226
AVEN	1.50021	0.980668	2.295	0.0614886	1.83342	1.16049	2.89655	0.00938095	0.52667	0.203008	0.863208	345	56	289
AVIL	1.30347	0.904131	1.87918	0.15561	1.06742	0.712707	1.59867	0.751566	0.522521	0.684211	0.40566	345	217	128
AVL9	0.33986	0.108078	1.06871	0.0648515	0.345751	0.107167	1.11549	0.0755534	0.514931	0.984962	0.0707547	345	18	327
AVP	0.561856	0.078503	4.02128	0.565884	0.738856	0.0999666	5.46091	0.766807	0.491063	1	0.0141509	345	4	341
AVPI1	0.894734	0.598161	1.33835	0.588232	0.867118	0.568554	1.32247	0.507917	0.506171	0.240602	0.820755	345	276	69
AVPR1A	1.77952	1.18384	2.67492	0.00557971	1.42345	0.916807	2.21006	0.115718	0.568769	0.774436	0.367925	345	237	108
AVPR1B	1.57819	0.388446	6.4119	0.523525	2.66947	0.60418	11.7946	0.195231	0.4587	0.992481	0.00943396	345	4	341
AVPR2	1.79382	1.25177	2.57057	0.00145609	1.56342	1.02004	2.39626	0.0402645	0.577174	0.661654	0.509434	345	192	153
AWAT1	0.966265	0.615727	1.51637	0.88135	0.950208	0.595132	1.51714	0.830592	0.503688	0.834586	0.193396	345	64	281
AWAT2	0.825571	0.522286	1.30497	0.411915	0.900907	0.561917	1.4444	0.664811	0.504611	0.842105	0.198113	345	64	281
AXIN1	0.649208	0.454467	0.927395	0.0175863	0.621586	0.428826	0.900992	0.0120585	0.549723	0.368421	0.75	345	244	101
AXIN2	0.478034	0.263887	0.865963	0.0149046	0.502865	0.266536	0.948739	0.0338016	0.530855	0.917293	0.179245	345	50	295
AXL	1.81758	1.25394	2.63457	0.00160641	1.61147	1.08793	2.38694	0.0172934	0.594659	0.699248	0.462264	345	207	138
AZGP1	0.745449	0.527078	1.05429	0.096709	0.644808	0.439868	0.945234	0.024539	0.494255	0.413534	0.65566	345	218	127
AZI1	0.738746	0.511166	1.06765	0.107055	0.859996	0.579713	1.27579	0.453526	0.50837	0.699248	0.377358	345	121	224
AZI2	0.809621	0.552209	1.18703	0.279361	0.766727	0.504781	1.1646	0.212959	0.505604	0.736842	0.363208	345	113	232
AZIN1	0.882302	0.616574	1.26255	0.493425	0.859214	0.584436	1.26318	0.440281	0.505675	0.360902	0.70283	345	235	110
AZU1	0.908344	0.645102	1.27901	0.581925	1.00618	0.701761	1.44265	0.973269	0.497074	0.548872	0.5	345	167	178
B2M	0.937183	0.656559	1.33775	0.720855	0.874801	0.600698	1.27398	0.485543	0.512732	0.360902	0.716981	345	238	107
B3GALNT1	1.24312	0.882165	1.75178	0.213666	1.22055	0.845127	1.76274	0.287911	0.541105	0.56391	0.533019	345	174	171
B3GALNT2	1.10801	0.787442	1.55909	0.556125	1.39653	0.967524	2.01575	0.0744808	0.494361	0.503759	0.551887	345	162	183
B3GALT1	1.41902	1.00657	2.00047	0.0457908	1.37537	0.956671	1.97731	0.0852864	0.573911	0.56391	0.584906	345	163	182
B3GALT2	1.2138	0.85314	1.72693	0.281457	1.117	0.747186	1.66984	0.589657	0.520038	0.62406	0.438679	345	202	143
B3GALT4	1.21764	0.857203	1.72963	0.271518	1.27674	0.867834	1.87832	0.21486	0.518088	0.383459	0.679245	345	119	226
B3GALT5	0.975953	0.687534	1.38536	0.891672	0.921342	0.634057	1.33879	0.667429	0.496578	0.390977	0.665094	345	223	122
B3GALT6	1.30846	0.877917	1.95013	0.18668	1.33134	0.870648	2.03582	0.186594	0.512626	0.240602	0.820755	345	70	275
B3GALTL	1.15991	0.820564	1.63958	0.400886	1.22959	0.857928	1.76227	0.260373	0.508015	0.586466	0.457547	345	193	152
B3GAT1	1.1151	0.786064	1.58188	0.541414	0.995632	0.688856	1.43903	0.981416	0.497996	0.390977	0.665094	345	123	222
B3GAT2	1.38614	0.955083	2.01174	0.0857707	1.4525	0.979584	2.15372	0.0632639	0.510037	0.300752	0.768868	345	89	256
B3GAT3	1.16682	0.763799	1.7825	0.475458	1.13727	0.729306	1.77344	0.570417	0.486807	0.796992	0.273585	345	260	85
B3GNT1	0.786478	0.557879	1.10875	0.170436	0.838496	0.575225	1.22226	0.359602	0.50266	0.571429	0.481132	345	160	185
B3GNT2	1.1014	0.783544	1.54819	0.578275	0.977615	0.679301	1.40693	0.90299	0.474252	0.511278	0.514151	345	171	174
B3GNT3	0.74349	0.526741	1.04943	0.0918751	0.813227	0.562346	1.17603	0.272003	0.539474	0.578947	0.551887	345	174	171
B3GNT4	1.40623	0.967495	2.04393	0.0739746	1.85584	1.21602	2.83231	0.00414751	0.521315	0.706767	0.415094	345	218	127
B3GNT5	0.820272	0.58107	1.15794	0.260041	1.02934	0.706997	1.49866	0.880054	0.507483	0.578947	0.518868	345	167	178
B3GNT6	1.77209	1.111	2.82656	0.0163131	1.54408	0.933914	2.5529	0.0903703	0.542737	0.157895	0.948113	345	32	313
B3GNT7	1.3128	0.930509	1.85214	0.121184	1.30245	0.880852	1.92583	0.185435	0.519648	0.571429	0.509434	345	180	165
B3GNT8	0.856872	0.574546	1.27793	0.448796	0.854233	0.562819	1.29654	0.459254	0.522592	0.766917	0.325472	345	101	244
B3GNT9	1.48308	1.04049	2.11393	0.0292997	1.3554	0.92581	1.98431	0.117912	0.591538	0.631579	0.542453	345	181	164
B3GNTL1	0.850548	0.604827	1.1961	0.352075	0.767871	0.535256	1.10158	0.151417	0.539545	0.518797	0.575472	345	187	158
B4GALNT1	1.85874	1.11595	3.09593	0.0172459	1.33478	0.774387	2.3007	0.298561	0.552206	0.87218	0.245283	345	276	69
B4GALNT2	0.941647	0.665026	1.33333	0.734749	0.859683	0.593011	1.24628	0.424885	0.503901	0.609023	0.443396	345	147	198
B4GALNT3	0.703496	0.487595	1.015	0.0600571	0.683885	0.46383	1.00834	0.0551064	0.531458	0.691729	0.386792	345	124	221
B4GALNT4	1.97281	1.15039	3.38318	0.0135459	1.62401	0.896155	2.94304	0.109928	0.535732	0.887218	0.231132	345	281	64
B4GALT1	0.735229	0.461112	1.1723	0.196311	0.656904	0.40041	1.0777	0.0961736	0.495318	0.849624	0.198113	345	63	282
B4GALT2	0.760914	0.537709	1.07677	0.122973	0.804132	0.561832	1.15093	0.233424	0.500638	0.428571	0.646226	345	214	131
B4GALT3	0.714822	0.483538	1.05673	0.092319	0.71869	0.457029	1.13016	0.152662	0.519613	0.263158	0.820755	345	273	72
B4GALT4	0.892245	0.634189	1.25531	0.51275	0.829114	0.579548	1.18615	0.305059	0.501099	0.511278	0.537736	345	180	165
B4GALT5	1.42895	1.00663	2.02845	0.0458309	1.7307	1.18997	2.51714	0.00410502	0.505958	0.601504	0.485849	345	189	156
B4GALT6	0.84073	0.474049	1.49104	0.552878	0.827006	0.453816	1.50708	0.535028	0.520428	0.909774	0.160377	345	47	298
B4GALT7	0.805882	0.571717	1.13596	0.217886	0.700335	0.489573	1.00183	0.0511821	0.490885	0.458647	0.608491	345	202	143
B9D1	0.676582	0.401178	1.14105	0.142877	0.754098	0.439209	1.29475	0.306145	0.518052	0.887218	0.179245	345	54	291
B9D2	0.374134	0.164893	0.848889	0.0186794	0.498958	0.212148	1.17352	0.111099	0.537825	0.962406	0.150943	345	38	307
BAALC	1.60476	1.13035	2.27826	0.00816273	1.35556	0.916057	2.00594	0.128143	0.555859	0.383459	0.745283	345	105	240
BAAT	0.878622	0.618611	1.24792	0.469792	0.915702	0.631691	1.3274	0.64202	0.514594	0.62406	0.433962	345	143	202
BACE1	1.57219	1.09809	2.25099	0.0134742	1.33143	0.900417	1.96876	0.151472	0.587885	0.654135	0.509434	345	191	154
BACE2	1.39957	0.943978	2.07505	0.0943194	1.55322	1.00925	2.39038	0.0453048	0.521067	0.24812	0.849057	345	65	280
BACH1	0.817936	0.541316	1.23591	0.339957	0.859921	0.558583	1.32382	0.492976	0.496773	0.225564	0.84434	345	283	62
BACH2	1.71267	1.21633	2.41153	0.00205875	1.44675	0.987822	2.1189	0.0578241	0.553979	0.533835	0.650943	345	145	200
BAD	0.791604	0.559648	1.1197	0.18653	0.810657	0.560486	1.17249	0.264926	0.527344	0.601504	0.481132	345	156	189
BAG1	0.787152	0.558184	1.11004	0.172354	0.822707	0.572451	1.18237	0.291579	0.523408	0.43609	0.65566	345	215	130
BAG2	1.52272	1.07136	2.16424	0.0190676	1.77562	1.19432	2.63985	0.00454553	0.54795	0.37594	0.754717	345	102	243
BAG3	1.02076	0.702465	1.48328	0.91418	1.07569	0.718932	1.60948	0.722671	0.504575	0.706767	0.34434	345	233	112
BAG4	0.768109	0.532486	1.10799	0.158139	1.28587	0.840708	1.96675	0.246177	0.557242	0.691729	0.410377	345	129	216
BAG5	1.29354	0.899204	1.86081	0.16535	1.15531	0.782811	1.70506	0.467252	0.528054	0.323308	0.754717	345	95	250
BAGE	0.526562	0.0734849	3.77313	0.523247	0.506384	0.069536	3.68765	0.501759	0.481079	1	0.0141509	345	4	341
BAGE2	1.56039	1.09409	2.22543	0.0140339	1.74763	1.185	2.57738	0.00485835	0.531565	0.639098	0.476415	345	196	149
BAHCC1	1.68224	1.08863	2.59954	0.0191605	1.18209	0.732707	1.90709	0.493026	0.558413	0.81203	0.306604	345	255	90
BAHD1	0.659535	0.457353	0.951097	0.0258534	0.775834	0.520636	1.15612	0.212342	0.531139	0.323308	0.773585	345	255	90
BAI1	1.50459	1.04577	2.16471	0.0277279	1.52225	0.993428	2.33257	0.0536464	0.555185	0.323308	0.816038	345	82	263
BAI2	0.698902	0.483565	1.01013	0.0566077	0.663258	0.446185	0.985937	0.0423582	0.522379	0.699248	0.400943	345	126	219
BAI3	1.61999	1.14555	2.29093	0.00636174	1.29252	0.889145	1.87888	0.178829	0.582813	0.593985	0.542453	345	176	169
BAIAP2	1.56974	1.08024	2.28105	0.0180419	1.7147	1.13099	2.59967	0.0110947	0.561782	0.706767	0.457547	345	209	136
BAIAP2L1	1.34178	0.952561	1.89005	0.0925837	1.49912	1.03611	2.16904	0.0317006	0.517627	0.458647	0.613208	345	143	202
BAIAP2L2	0.664722	0.423587	1.04313	0.0756827	0.679229	0.426378	1.08203	0.103498	0.542878	0.834586	0.268868	345	80	265
BAIAP3	3.71319	1.18029	11.6817	0.0248697	3.32718	0.967284	11.4446	0.0564957	0.523567	0.977444	0.0943396	345	322	23
BAK1	0.671584	0.474924	0.949677	0.0243198	0.755808	0.513876	1.11164	0.154942	0.561037	0.601504	0.528302	345	166	179
BAMBI	0.684454	0.448427	1.04471	0.0788779	0.656378	0.412944	1.04332	0.0749768	0.518371	0.804511	0.292453	345	89	256
BANF1	0.776157	0.552086	1.09117	0.144852	0.825028	0.574278	1.18526	0.298109	0.553979	0.496241	0.636792	345	203	142
BANF2	0.829059	0.554204	1.24023	0.361628	1.00917	0.658774	1.54593	0.966552	0.521865	0.774436	0.29717	345	94	251
BANK1	1.30655	0.91293	1.86987	0.143767	1.18261	0.797542	1.75358	0.404025	0.529118	0.654135	0.443396	345	205	140
BANP	1.46277	1.03726	2.06284	0.0301182	1.60729	1.10733	2.33299	0.0125514	0.527593	0.451128	0.650943	345	134	211
BAP1	0.787434	0.559847	1.10754	0.169724	0.965813	0.67319	1.38563	0.850183	0.487516	0.541353	0.5	345	168	177
BARD1	0.74406	0.503519	1.09951	0.137856	0.894833	0.592168	1.35219	0.597828	0.549617	0.75188	0.339623	345	106	239
BARHL1	0.77451	0.517958	1.15814	0.213213	0.824471	0.545664	1.24573	0.359374	0.495868	0.774436	0.29717	345	94	251
BARHL2	2.29465	0.318726	16.5202	0.409558	1.82882	0.247508	13.5131	0.554123	0.492729	1	0.00471698	345	2	343
BARX1	1.51712	1.07831	2.1345	0.0167211	1.39532	0.945624	2.05887	0.0932916	0.547383	0.481203	0.632075	345	142	203
BARX2	0.848242	0.582473	1.23527	0.390772	0.672667	0.453793	0.997106	0.048337	0.528125	0.300752	0.778302	345	259	86
BASE	0.790588	0.400627	1.56013	0.49807	0.587854	0.291933	1.18374	0.136845	0.510924	0.93985	0.0896226	345	28	317
BASP1	1.98463	1.39245	2.82864	0.000150003	1.67481	1.13778	2.4653	0.00893984	0.575223	0.639098	0.561321	345	178	167
BAT1	0.791663	0.557381	1.12442	0.191912	0.79775	0.552185	1.15252	0.228687	0.516314	0.62406	0.471698	345	151	194
BAT2	1.07617	0.750845	1.54244	0.689383	1.23255	0.838197	1.81245	0.287873	0.507306	0.661654	0.400943	345	215	130
BAT2L1	1.16219	0.75659	1.78521	0.49252	1.03801	0.665642	1.61867	0.869299	0.485246	0.195489	0.839623	345	60	285
BAT2L2	0.733303	0.434782	1.23679	0.244786	0.813929	0.468362	1.41446	0.465279	0.511739	0.887218	0.188679	345	56	289
BAT3	1.10317	0.756141	1.60947	0.610401	1.1914	0.783514	1.81163	0.412773	0.485175	0.714286	0.316038	345	240	105
BAT4	0.882856	0.599555	1.30002	0.528009	0.932296	0.621874	1.39767	0.734354	0.515534	0.744361	0.325472	345	104	241
BAT5	0.619759	0.439019	0.874907	0.00653539	0.722721	0.49258	1.06039	0.0968742	0.552241	0.428571	0.698113	345	225	120
BATF	1.36928	0.94095	1.99259	0.100595	1.29204	0.857995	1.94566	0.219935	0.507288	0.293233	0.811321	345	79	266
BATF2	0.717111	0.508148	1.012	0.0584825	0.72369	0.499628	1.04823	0.0871234	0.556639	0.428571	0.683962	345	222	123
BATF3	1.28221	0.911557	1.80357	0.153289	1.20542	0.844071	1.72147	0.304142	0.513371	0.533835	0.542453	345	168	177
BAX	0.693091	0.482756	0.99507	0.0469504	0.705553	0.475911	1.046	0.0825494	0.518655	0.338346	0.745283	345	247	98
BAZ1A	0.920779	0.654685	1.29503	0.635291	0.738382	0.507669	1.07394	0.11257	0.505072	0.511278	0.551887	345	183	162
BAZ1B	0.704176	0.500448	0.99084	0.0441383	0.645133	0.449634	0.925636	0.0173371	0.52128	0.533835	0.54717	345	179	166
BAZ2A	1.0055	0.714831	1.41438	0.974843	0.986546	0.680107	1.43106	0.943101	0.485494	0.473684	0.561321	345	156	189
BAZ2B	1.48705	1.05812	2.08986	0.0222938	1.68923	1.15924	2.46153	0.00634966	0.532806	0.511278	0.603774	345	152	193
BBC3	0.662342	0.467762	0.937864	0.0202626	0.690952	0.467968	1.02019	0.0629654	0.525216	0.406015	0.688679	345	226	119
BBOX1	1.3208	0.9088	1.91959	0.144666	1.13941	0.706399	1.83783	0.592629	0.531671	0.706767	0.382075	345	225	120
BBS1	1.35961	0.947442	1.9511	0.0955156	1.14277	0.75979	1.71881	0.521625	0.578486	0.345865	0.778302	345	93	252
BBS10	1.70004	1.18183	2.44547	0.00422925	1.64054	1.05712	2.54595	0.027267	0.558217	0.676692	0.471698	345	202	143
BBS12	1.11719	0.792725	1.57445	0.526706	1.21113	0.843548	1.73889	0.299267	0.525713	0.443609	0.646226	345	134	211
BBS2	1.11868	0.794877	1.57438	0.520073	1.15759	0.805049	1.66452	0.429684	0.497234	0.541353	0.518868	345	174	171
BBS4	1.51414	1.07656	2.12957	0.0171303	1.54285	1.0754	2.2135	0.0185383	0.530678	0.533835	0.580189	345	160	185
BBS5	1.17384	0.83272	1.6547	0.360205	1.33766	0.914728	1.95612	0.133533	0.493439	0.56391	0.471698	345	187	158
BBS7	0.819853	0.57421	1.17058	0.274321	0.90087	0.611521	1.32713	0.597398	0.501702	0.654135	0.40566	345	133	212
BBS9	1.4725	1.04339	2.07809	0.0276917	1.52866	1.0473	2.23125	0.0278433	0.578061	0.578947	0.561321	345	170	175
BBX	1.40771	0.978479	2.02523	0.0653683	1.54567	1.0492	2.27707	0.0275986	0.553696	0.323308	0.787736	345	88	257
BCAM	1.66467	1.1608	2.38725	0.0055949	1.44243	0.96516	2.15571	0.0739405	0.560399	0.661654	0.471698	345	200	145
BCAN	0.48327	0.307987	0.75831	0.00155841	0.590601	0.368272	0.947152	0.0288689	0.592389	0.834586	0.339623	345	95	250
BCAP29	1.53229	1.07101	2.19225	0.0195232	1.5263	1.03768	2.24501	0.0317255	0.534083	0.654135	0.443396	345	205	140
BCAP31	0.652056	0.462897	0.918511	0.0144367	0.646146	0.446101	0.935896	0.0208632	0.541992	0.56391	0.561321	345	178	167
BCAR1	1.62037	0.714192	3.67634	0.248218	1.19272	0.503287	2.82659	0.688912	0.512342	0.954887	0.113208	345	315	30
BCAR3	1.51769	0.979612	2.35132	0.0617979	1.24892	0.783434	1.99097	0.350207	0.510924	0.81203	0.259434	345	265	80
BCAR4	0.929173	0.55019	1.56921	0.783506	0.861639	0.499269	1.48702	0.592738	0.482941	0.887218	0.141509	345	46	299
BCAS1	0.781096	0.474921	1.28466	0.330448	0.810146	0.484908	1.35353	0.421402	0.477834	0.142857	0.896226	345	305	40
BCAS2	0.811254	0.575225	1.14413	0.233103	0.994061	0.678547	1.45628	0.975609	0.546141	0.578947	0.533019	345	170	175
BCAS3	1.3146	0.928187	1.86189	0.123483	1.74685	1.1832	2.57899	0.0050116	0.531068	0.398496	0.698113	345	117	228
BCAS4	1.38952	0.833693	2.3159	0.206911	1.12162	0.645966	1.94754	0.683497	0.531139	0.87218	0.207547	345	284	61
BCAT1	1.80472	1.27678	2.55094	0.00082623	1.7935	1.2496	2.57416	0.00153207	0.559902	0.451128	0.683962	345	127	218
BCAT2	0.719748	0.504686	1.02645	0.0694011	0.92639	0.628444	1.36559	0.699357	0.535111	0.368421	0.731132	345	240	105
BCCIP	0.654713	0.465004	0.921816	0.0152532	0.757046	0.522834	1.09618	0.140551	0.551071	0.458647	0.683962	345	218	127
BCDIN3D	1.46792	0.985766	2.1859	0.0588387	2.00228	1.28092	3.12986	0.00231711	0.487622	0.759398	0.292453	345	251	94
BCHE	2.18454	1.47867	3.22739	8.69722e-05	1.78558	1.15457	2.76146	0.0091588	0.605547	0.744361	0.462264	345	213	132
BCKDHA	0.768649	0.538043	1.09809	0.148237	0.871139	0.595412	1.27455	0.477385	0.532877	0.654135	0.457547	345	144	201
BCKDHB	1.06209	0.755701	1.49269	0.728681	1.18199	0.803658	1.73844	0.39562	0.485246	0.488722	0.533019	345	182	163
BCKDK	1.23077	0.871644	1.73785	0.238176	1.22253	0.848074	1.76232	0.281564	0.548553	0.578947	0.518868	345	179	166
BCL10	0.734574	0.521605	1.0345	0.0774275	0.850874	0.579522	1.24928	0.409863	0.559689	0.56391	0.561321	345	178	167
BCL11A	0.901457	0.636767	1.27617	0.558582	0.893837	0.608746	1.31244	0.566876	0.502341	0.609023	0.471698	345	153	192
BCL11B	0.656379	0.461508	0.933533	0.0191463	0.692157	0.473792	1.01116	0.0570984	0.57228	0.383459	0.768868	345	246	99
BCL2	1.43708	1.02084	2.02302	0.0376908	1.45681	0.987695	2.14873	0.057759	0.522485	0.466165	0.632075	345	140	205
BCL2A1	1.42373	0.932302	2.17421	0.101953	1.37798	0.881059	2.15516	0.160012	0.49241	0.203008	0.84434	345	60	285
BCL2L1	1.3106	0.665081	2.58266	0.434485	1.287	0.612486	2.70436	0.505414	0.490814	0.932331	0.0990566	345	315	30
BCL2L10	1.40014	0.926963	2.11486	0.109702	1.08719	0.664139	1.77971	0.739564	0.5255	0.781955	0.292453	345	254	91
BCL2L11	1.45787	1.03113	2.06122	0.0328861	1.36241	0.94822	1.95753	0.0944394	0.545326	0.586466	0.523585	345	179	166
BCL2L12	0.659855	0.447129	0.973788	0.0362835	0.661298	0.43624	1.00247	0.0513715	0.541495	0.270677	0.849057	345	278	67
BCL2L13	1.44441	1.02669	2.03208	0.0347558	1.69406	1.17268	2.44725	0.00497388	0.519932	0.466165	0.608491	345	145	200
BCL2L14	0.729434	0.483202	1.10114	0.133243	0.715809	0.467177	1.09676	0.124607	0.533764	0.789474	0.292453	345	91	254
BCL2L15	0.772086	0.548944	1.08593	0.137209	0.773648	0.541479	1.10536	0.158625	0.537913	0.473684	0.617925	345	202	143
BCL2L2	1.14015	0.811332	1.60222	0.449924	1.01098	0.711339	1.43683	0.951464	0.532203	0.503759	0.584906	345	155	190
BCL3	1.39704	0.816106	2.39151	0.222821	1.07875	0.615979	1.88918	0.790906	0.495354	0.887218	0.198113	345	288	57
BCL6	1.64091	1.10511	2.43648	0.014069	1.40393	0.920217	2.14189	0.115446	0.564655	0.24812	0.882075	345	58	287
BCL6B	3.16954	1.39646	7.19391	0.00580701	2.57337	1.08795	6.08686	0.031407	0.546886	0.954887	0.183962	345	300	45
BCL7A	0.724052	0.479124	1.09419	0.12535	0.820629	0.533807	1.26156	0.3676	0.542878	0.789474	0.320755	345	97	248
BCL7B	0.777197	0.545797	1.1067	0.162188	0.831267	0.572942	1.20606	0.33043	0.504646	0.37594	0.712264	345	235	110
BCL7C	0.823038	0.569712	1.18901	0.29945	0.993073	0.66668	1.47926	0.972726	0.517449	0.323308	0.75	345	250	95
BCL8	1.43866	1.0216	2.02598	0.0373134	1.25939	0.861838	1.84034	0.233386	0.534526	0.443609	0.660377	345	131	214
BCL9	1.28146	0.867745	1.89242	0.212475	1.47905	0.961486	2.27523	0.0748753	0.503618	0.744361	0.330189	345	241	104
BCL9L	0.785447	0.557333	1.10693	0.167705	0.795743	0.557017	1.13678	0.209298	0.503582	0.571429	0.476415	345	159	186
BCLAF1	1.36901	0.972882	1.92642	0.0715121	1.48081	1.02234	2.14487	0.0378156	0.517095	0.541353	0.54717	345	168	177
BCMO1	0.832046	0.590933	1.17154	0.292272	0.944478	0.658909	1.35381	0.755832	0.509824	0.481203	0.584906	345	194	151
BCO2	1.33489	0.903272	1.97274	0.147208	1.11976	0.729609	1.71853	0.604777	0.510001	0.744361	0.34434	345	238	107
BCOR	0.586995	0.323794	1.06414	0.0792346	0.801377	0.4178	1.53711	0.505218	0.489006	0.0977444	0.943396	345	321	24
BCORL1	0.984382	0.698427	1.38741	0.928367	0.926453	0.643352	1.33413	0.681385	0.510817	0.43609	0.617925	345	139	206
BCORL2	1.43894	1.02097	2.02801	0.0376636	1.23501	0.788238	1.93501	0.356879	0.577777	0.443609	0.688679	345	125	220
BCR	0.778309	0.506898	1.19504	0.251979	1.05544	0.67424	1.65215	0.813447	0.507022	0.81203	0.240566	345	77	268
BCS1L	0.862027	0.604601	1.22906	0.412016	1.01647	0.686274	1.50554	0.935031	0.511846	0.646617	0.419811	345	137	208
BCYRN1									0.516775	0.977444	0.0566038	345	345	0
BDH1	0.671948	0.451186	1.00073	0.0504202	0.81966	0.537021	1.25105	0.356652	0.564442	0.766917	0.367925	345	110	235
BDH2	1.6537	1.15602	2.36564	0.00589395	1.67526	1.13784	2.46651	0.00894314	0.535608	0.654135	0.462264	345	201	144
BDKRB1	0.82265	0.564487	1.19888	0.309637	0.637475	0.428409	0.948569	0.0263948	0.497553	0.721805	0.334906	345	109	236
BDKRB2	1.24559	0.859554	1.805	0.245915	0.941218	0.624773	1.41794	0.772005	0.516243	0.300752	0.778302	345	87	258
BDNF	0.903038	0.639141	1.2759	0.563031	0.741331	0.51871	1.0595	0.100432	0.520322	0.593985	0.504717	345	162	183
BDNFOS	0.833171	0.588535	1.1795	0.303423	0.79394	0.538374	1.17082	0.244323	0.512945	0.601504	0.485849	345	157	188
BDP1	1.51072	1.0718	2.12939	0.0184777	1.60177	1.09441	2.34433	0.015343	0.539225	0.56391	0.556604	345	169	176
BEAN	1.16831	0.828611	1.64726	0.374849	1.14425	0.784121	1.66977	0.484688	0.534491	0.571429	0.523585	345	177	168
BECN1	0.883505	0.560965	1.3915	0.593046	0.834772	0.508538	1.37029	0.475111	0.506703	0.180451	0.872642	345	295	50
BEGAIN	1.49412	0.935663	2.38588	0.0926688	1.27817	0.75729	2.15734	0.3581	0.528213	0.842105	0.235849	345	274	71
BEND2	0.985669	0.481903	2.01606	0.968463	1.30323	0.596472	2.84744	0.506583	0.464711	0.947368	0.0613208	345	21	324
BEND3	1.34696	0.958217	1.89341	0.0864727	1.5271	1.05169	2.21742	0.0260952	0.515605	0.473684	0.617925	345	144	201
BEND4	1.3029	0.910695	1.86402	0.147612	1.12863	0.770237	1.65378	0.534767	0.521351	0.654135	0.438679	345	206	139
BEND5	1.78124	1.26069	2.51672	0.00106201	1.72666	1.16245	2.5647	0.00681689	0.589747	0.421053	0.745283	345	110	235
BEND6	2.17242	1.39399	3.38556	0.000609544	2.59946	1.52493	4.43115	0.000447222	0.56242	0.180451	0.929245	345	39	306
BEND7	1.14321	0.812678	1.60818	0.44208	1.36795	0.949696	1.97041	0.0924223	0.491275	0.466165	0.59434	345	148	197
BEST1	1.45538	1.02901	2.0584	0.033867	1.1635	0.797316	1.69785	0.43227	0.547276	0.593985	0.509434	345	183	162
BEST2	0.979418	0.662407	1.44814	0.916989	1.02683	0.681044	1.54819	0.899415	0.517999	0.75188	0.301887	345	98	247
BEST3	0.782067	0.512323	1.19383	0.254692	0.817849	0.516592	1.29479	0.39099	0.511136	0.804511	0.301887	345	91	254
BEST4	1.3369	0.945427	1.89047	0.100486	1.11132	0.758326	1.62862	0.58832	0.521102	0.586466	0.495283	345	185	160
BET1	1.6135	1.11835	2.32787	0.0105257	1.50534	1.01677	2.22868	0.0410498	0.521386	0.315789	0.787736	345	87	258
BET1L	1.30554	0.92671	1.83924	0.127336	1.20046	0.817618	1.76256	0.35114	0.552525	0.443609	0.688679	345	125	220
BET3L	0.910761	0.64637	1.2833	0.593151	0.787738	0.543073	1.14263	0.208635	0.513317	0.451128	0.613208	345	204	141
BEX1	1.58366	1.05786	2.37082	0.0255371	1.55594	0.992754	2.43861	0.0538248	0.560257	0.233083	0.882075	345	56	289
BEX2	1.73325	1.17288	2.56133	0.00577528	1.33532	0.874534	2.03889	0.18053	0.571393	0.744361	0.391509	345	228	117
BEX4	1.67133	1.18721	2.35287	0.00324629	1.27379	0.850842	1.90699	0.239833	0.590616	0.458647	0.698113	345	125	220
BEX5	0.963264	0.578306	1.60448	0.885679	0.790463	0.443396	1.40919	0.425381	0.484856	0.879699	0.15566	345	50	295
BEYLA									0.482693	0	1	345	345	0
BFAR	1.65351	1.08494	2.52003	0.0193259	1.97408	1.26378	3.08358	0.0028008	0.532026	0.781955	0.301887	345	252	93
BFSP1	1.4857	1.02997	2.14309	0.0341817	1.44285	0.964713	2.15796	0.0742536	0.527699	0.684211	0.419811	345	214	131
BFSP2	1.31347	0.918202	1.8789	0.135496	1.25687	0.860075	1.83674	0.237525	0.530714	0.654135	0.443396	345	205	140
BGLAP	1.53286	1.08953	2.15658	0.0141967	1.35361	0.945704	1.93745	0.0979566	0.541318	0.488722	0.636792	345	142	203
BGN	1.88806	1.32731	2.6857	0.000408051	1.74663	1.19467	2.55362	0.00400455	0.58026	0.398496	0.783019	345	99	246
BHLHA15	0.936767	0.655774	1.33816	0.719594	0.791089	0.545896	1.14641	0.215685	0.499539	0.360902	0.693396	345	233	112
BHLHB9	1.35681	0.965109	1.90748	0.0791518	1.35346	0.928493	1.97293	0.115465	0.537381	0.473684	0.613208	345	145	200
BHLHE22	1.51105	1.07517	2.12363	0.0174376	1.39519	0.948617	2.05198	0.0906525	0.550468	0.496241	0.632075	345	144	201
BHLHE23	1.04908	0.590487	1.86382	0.870214	1.07185	0.592532	1.93889	0.818538	0.50321	0.917293	0.117925	345	38	307
BHLHE40	1.4431	0.987449	2.109	0.0581293	1.37198	0.920249	2.04545	0.120643	0.544297	0.721805	0.400943	345	223	122
BHLHE41	1.6116	1.08672	2.39	0.017616	1.58344	1.0348	2.42294	0.0342089	0.531919	0.75188	0.349057	345	238	107
BHMT	1.57298	1.03996	2.3792	0.0319092	1.42841	0.922913	2.21079	0.109599	0.543322	0.781955	0.330189	345	246	99
BHMT2	1.52271	1.07134	2.16424	0.0190706	1.37482	0.900206	2.09968	0.140653	0.55327	0.37594	0.735849	345	106	239
BICC1	1.67526	1.17907	2.38026	0.00398724	1.5993	1.07904	2.37042	0.0193431	0.580011	0.62406	0.537736	345	181	164
BICD1	1.23296	0.845712	1.79752	0.276267	1.16783	0.789112	1.7283	0.437912	0.501029	0.285714	0.764151	345	88	257
BICD2	1.3596	0.910712	2.02975	0.132967	1.39334	0.881741	2.20179	0.155358	0.518974	0.240602	0.84434	345	65	280
BID	0.595116	0.40843	0.867134	0.00688763	0.725799	0.485065	1.08601	0.119073	0.571712	0.721805	0.438679	345	131	214
BIK	0.679471	0.477653	0.96656	0.0316254	0.814049	0.557105	1.1895	0.287698	0.568059	0.383459	0.773585	345	247	98
BIN1	0.993624	0.656771	1.50325	0.975845	0.896979	0.580894	1.38506	0.623798	0.480458	0.789474	0.264151	345	85	260
BIN2	1.35517	0.952171	1.92874	0.09145	1.30077	0.88046	1.92172	0.186637	0.537913	0.37594	0.731132	345	107	238
BIN3	0.514492	0.339	0.780832	0.00179468	0.532829	0.345422	0.821911	0.00441572	0.563768	0.796992	0.382075	345	109	236
BIRC2	1.22231	0.833493	1.79249	0.304132	1.30672	0.869344	1.96415	0.19824	0.51259	0.729323	0.330189	345	239	106
BIRC3	1.14816	0.816184	1.61516	0.42751	1.03174	0.710909	1.49735	0.869403	0.516279	0.481203	0.613208	345	146	199
BIRC5	0.692351	0.48901	0.980245	0.0382249	0.822451	0.566732	1.19355	0.303597	0.559157	0.609023	0.495283	345	158	187
BIRC6	0.773766	0.538409	1.112	0.165687	0.807501	0.537752	1.21256	0.302643	0.485991	0.338346	0.740566	345	246	99
BIRC7	1.78152	1.22953	2.5813	0.00227242	1.78825	1.1967	2.67221	0.0045655	0.529721	0.308271	0.792453	345	85	260
BIRC8	0.714337	0.333314	1.53092	0.387061	0.728019	0.334301	1.58543	0.424068	0.484821	0.954887	0.0896226	345	26	319
BIVM	0.796064	0.524276	1.20875	0.284488	0.830754	0.536361	1.28673	0.406185	0.525642	0.796992	0.292453	345	90	255
BLCAP	1.09565	0.776636	1.54571	0.602871	1.11407	0.766839	1.61852	0.570826	0.514967	0.556391	0.509434	345	178	167
BLID									0.463967	0	1	345	345	0
BLK	1.63695	1.1032	2.42894	0.0143748	1.63716	1.07583	2.49139	0.0213826	0.549652	0.75188	0.358491	345	236	109
BLM	0.806883	0.565977	1.15033	0.235647	0.723328	0.493235	1.06076	0.0973129	0.521705	0.646617	0.429245	345	139	206
BLMH	1.83662	1.26649	2.66342	0.00134708	2.18831	1.44957	3.30353	0.000193955	0.552064	0.691729	0.471698	345	204	141
BLNK	0.739075	0.467671	1.16798	0.195343	0.939307	0.580416	1.52011	0.798781	0.535679	0.842105	0.25	345	75	270
BLOC1S1	0.880181	0.576298	1.3443	0.554747	0.850215	0.546071	1.32376	0.472549	0.503334	0.804511	0.259434	345	82	263
BLOC1S2	0.701114	0.49421	0.994639	0.0465812	0.77354	0.536943	1.11439	0.168046	0.543091	0.390977	0.745283	345	240	105
BLOC1S3	0.72806	0.516371	1.02653	0.0702051	0.619398	0.427633	0.897157	0.0112739	0.510108	0.571429	0.504717	345	165	180
BLVRA	1.55225	1.09497	2.20051	0.0135297	1.67959	1.16312	2.42539	0.00567543	0.563484	0.609023	0.542453	345	178	167
BLVRB	0.690723	0.472616	1.00948	0.055978	0.713699	0.467594	1.08933	0.117968	0.540077	0.729323	0.391509	345	120	225
BLZF1	0.886729	0.628579	1.2509	0.49348	1.0491	0.733613	1.50026	0.792825	0.528905	0.578947	0.523585	345	168	177
BMF	1.56713	1.0841	2.26538	0.0168743	1.41416	0.92034	2.17296	0.113834	0.555753	0.691729	0.438679	345	211	134
BMI1	0.875841	0.558201	1.37423	0.564069	0.836695	0.523065	1.33838	0.456933	0.495567	0.834586	0.231132	345	72	273
BMP1	1.06927	0.749002	1.52647	0.712325	0.949425	0.646613	1.39404	0.791146	0.465846	0.383459	0.636792	345	218	127
BMP10	1.06724	0.663271	1.71724	0.788588	0.858524	0.516015	1.42838	0.557013	0.487392	0.857143	0.150943	345	52	293
BMP15									0.488509	0	1	345	345	0
BMP2	1.2559	0.893054	1.76616	0.190274	1.19174	0.836839	1.69716	0.330813	0.534047	0.533835	0.556604	345	165	180
BMP2K	1.42374	1.01269	2.00166	0.0421047	1.33805	0.940108	1.90443	0.105873	0.527025	0.526316	0.603774	345	154	191
BMP3	1.44737	1.00389	2.08677	0.0476164	1.25521	0.837523	1.88122	0.270861	0.557402	0.684211	0.424528	345	213	132
BMP4	0.561983	0.349137	0.90459	0.0176519	0.543101	0.331353	0.890166	0.0154577	0.546177	0.857143	0.273585	345	78	267
BMP5	0.950232	0.675619	1.33646	0.769254	0.961565	0.675372	1.36903	0.827873	0.473259	0.541353	0.490566	345	166	179
BMP6	1.72706	1.17283	2.54318	0.00565127	1.19705	0.789648	1.81465	0.396799	0.550965	0.736842	0.396226	345	226	119
BMP7	0.853834	0.607622	1.19981	0.362599	0.769128	0.523674	1.12963	0.180748	0.52284	0.496241	0.584906	345	192	153
BMP8A	1.58605	1.09366	2.3001	0.0150131	1.19366	0.801888	1.77684	0.383111	0.547737	0.699248	0.424528	345	215	130
BMP8B	1.28153	0.876536	1.87364	0.200553	1.27842	0.842788	1.93922	0.247928	0.524401	0.278195	0.806604	345	78	267
BMPER	1.26925	0.902262	1.78551	0.170908	0.976323	0.648243	1.47045	0.908698	0.549191	0.458647	0.646226	345	136	209
BMPR1A	1.25772	0.877411	1.80288	0.211988	1.77322	1.19462	2.63205	0.00447739	0.526564	0.338346	0.745283	345	99	246
BMPR1B	1.65423	1.16035	2.35834	0.00540371	1.33476	0.921975	1.93236	0.12611	0.550752	0.639098	0.490566	345	193	152
BMPR2	1.81284	1.26255	2.60297	0.00126826	1.79425	1.20111	2.68028	0.00430536	0.563484	0.330827	0.811321	345	84	261
BMS1	0.841149	0.589124	1.20099	0.341082	0.841702	0.572732	1.23699	0.380337	0.510072	0.654135	0.410377	345	134	211
BMS1P4	0.675404	0.479922	0.95051	0.0243787	0.584093	0.40315	0.846246	0.00447596	0.537629	0.481203	0.646226	345	207	138
BMS1P5	1.08959	0.614058	1.93338	0.769332	1.01815	0.566326	1.83046	0.952064	0.485565	0.909774	0.122642	345	39	306
BMX	1.64124	1.13257	2.37837	0.00885298	1.33672	0.887112	2.01421	0.165333	0.539598	0.699248	0.448113	345	210	135
BNC1	1.5459	1.07596	2.22109	0.0184772	1.25786	0.85936	1.84116	0.237911	0.541921	0.669173	0.438679	345	208	137
BNC2	1.58481	1.10755	2.26774	0.0117782	1.40005	0.935136	2.0961	0.102202	0.570542	0.654135	0.471698	345	199	146
BNIP1	0.745143	0.522057	1.06356	0.105119	0.755122	0.514901	1.10742	0.150516	0.530323	0.360902	0.745283	345	244	101
BNIP2	1.94129	1.31443	2.8671	0.000855604	1.53499	1.00643	2.34114	0.0466235	0.588771	0.744361	0.433962	345	219	126
BNIP3	2.67431	1.47625	4.84468	0.00117544	2.23585	1.20246	4.15734	0.0110047	0.571925	0.909774	0.226415	345	285	60
BNIP3L	1.94217	1.28009	2.94668	0.00180291	2.56503	1.63887	4.0146	3.76623e-05	0.527486	0.218045	0.872642	345	56	289
BNIPL	0.589011	0.375723	0.923376	0.0210275	0.556981	0.335538	0.924569	0.0236188	0.566321	0.834586	0.311321	345	89	256
BOC	1.76093	1.24173	2.49723	0.00150016	1.52611	1.02732	2.26709	0.0363107	0.578841	0.609023	0.542453	345	178	167
BOD1	1.21411	0.84373	1.74709	0.29609	1.03091	0.690104	1.54001	0.881834	0.51901	0.323308	0.735849	345	99	246
BOD1L	1.40795	1.00109	1.98015	0.0492694	1.12267	0.769643	1.63762	0.548042	0.527132	0.488722	0.599057	345	150	195
BOK	1.53847	1.05457	2.24442	0.0253717	1.69596	1.1386	2.52616	0.00936465	0.530749	0.714286	0.400943	345	222	123
BOLA1	0.719958	0.510307	1.01574	0.0613409	0.781663	0.541283	1.12879	0.188909	0.516173	0.503759	0.603774	345	195	150
BOLA2	0.726049	0.510935	1.03173	0.0741444	0.776135	0.538721	1.11818	0.17371	0.534402	0.631579	0.476415	345	151	194
BOLA3	0.830994	0.588751	1.17291	0.292381	0.88111	0.617846	1.25655	0.484603	0.556781	0.443609	0.698113	345	223	122
BOLL	0.743033	0.525859	1.0499	0.0921998	0.66415	0.45451	0.970487	0.0344499	0.543588	0.593985	0.551887	345	172	173
BOP1	0.655178	0.463211	0.926701	0.0168355	0.649674	0.443295	0.952134	0.027003	0.558838	0.413534	0.754717	345	239	106
BPESC1	0.948369	0.617589	1.45631	0.808595	1.1083	0.696441	1.76371	0.664449	0.459994	0.81203	0.212264	345	71	274
BPGM	1.51479	1.01277	2.26564	0.0432024	1.77613	1.15275	2.7366	0.00920113	0.501773	0.766917	0.320755	345	246	99
BPHL	1.48553	1.0538	2.09414	0.0238789	1.61427	1.12389	2.31861	0.00953778	0.499752	0.466165	0.613208	345	144	201
BPI	1.63593	1.07797	2.48268	0.0207363	1.43269	0.923735	2.22206	0.108342	0.568432	0.789474	0.34434	345	244	101
BPIL1	1.56484	0.217876	11.2391	0.65622	2.6612	0.238451	29.7	0.426484	0.449904	1	0.00471698	345	2	343
BPIL2	1.06843	0.669707	1.70455	0.781208	1.1807	0.700881	1.98899	0.532464	0.494361	0.849624	0.15566	345	54	291
BPIL3	0.863454	0.120503	6.18702	0.883826	1.04099	0.130909	8.278	0.969706	0.482001	1	0.00943396	345	3	342
BPNT1	0.799644	0.567223	1.1273	0.201924	0.895268	0.621823	1.28896	0.551889	0.588027	0.526316	0.617925	345	195	150
BPTF	1.22492	0.868945	1.72672	0.246833	1.21745	0.83738	1.77001	0.302792	0.496028	0.56391	0.495283	345	182	163
BPY2									0.480068	0	1	345	345	0
BRAF	1.24812	0.88786	1.75455	0.20214	1.26998	0.884232	1.824	0.195707	0.510569	0.473684	0.608491	345	146	199
BRAP	0.746275	0.529966	1.05087	0.0937708	0.787377	0.551555	1.12403	0.188103	0.542914	0.466165	0.636792	345	207	138
BRCA1	0.693731	0.492396	0.977389	0.0365528	0.643616	0.442402	0.936348	0.0212333	0.533941	0.466165	0.660377	345	212	133
BRCA2	0.808344	0.567851	1.15069	0.237633	0.656726	0.447334	0.964134	0.0318403	0.533906	0.639098	0.45283	345	145	200
BRCC3	0.631146	0.447554	0.89005	0.00868761	0.661104	0.457072	0.956214	0.0279679	0.591396	0.56391	0.627358	345	192	153
BRD1	1.29073	0.835163	1.99479	0.250562	1.37056	0.873906	2.14946	0.169777	0.509008	0.18797	0.882075	345	50	295
BRD2	0.537992	0.345432	0.837894	0.00609964	0.551502	0.347637	0.874919	0.0114887	0.54412	0.827068	0.316038	345	91	254
BRD3	1.11846	0.748035	1.67231	0.585428	0.961773	0.615671	1.50244	0.86402	0.514115	0.766917	0.301887	345	250	95
BRD4	1.1975	0.846226	1.6946	0.308944	1.01907	0.702216	1.4789	0.920794	0.543694	0.406015	0.721698	345	113	232
BRD7	0.902749	0.639259	1.27485	0.561237	0.964842	0.670805	1.38777	0.846967	0.533551	0.428571	0.65566	345	216	129
BRD7P3	1.43632	1.01992	2.02271	0.0381825	1.3583	0.943878	1.95467	0.0991568	0.528798	0.556391	0.542453	345	171	174
BRD8	1.42594	1.00066	2.03196	0.0495717	1.59028	1.08093	2.33964	0.0185209	0.536636	0.368421	0.75	345	102	243
BRD9	1.31864	0.925268	1.87924	0.125954	1.11079	0.741525	1.66395	0.610329	0.523798	0.360902	0.731132	345	105	240
BRDT	0.463996	0.0647234	3.32635	0.44483	0.559317	0.0767789	4.0745	0.566318	0.482161	1	0.0141509	345	4	341
BRE	0.715835	0.509088	1.00654	0.0545492	0.775611	0.5402	1.11361	0.168547	0.55022	0.481203	0.646226	345	207	138
BREA2	1.31326	0.931985	1.85051	0.119374	1.34302	0.930117	1.93923	0.115613	0.504664	0.443609	0.622642	345	139	206
BRF1	1.3038	0.8636	1.96839	0.206868	1.23759	0.805217	1.90214	0.331021	0.529969	0.781955	0.306604	345	251	94
BRF2	0.656507	0.465453	0.925983	0.0164756	0.865789	0.583574	1.28448	0.473966	0.560079	0.578947	0.580189	345	180	165
BRI3	0.858628	0.587476	1.25493	0.431174	0.973077	0.65275	1.4506	0.893422	0.496844	0.285714	0.773585	345	260	85
BRI3BP	0.589322	0.414771	0.83733	0.00317134	0.679343	0.45207	1.02088	0.0628099	0.603383	0.390977	0.79717	345	251	94
BRIP1	0.517757	0.314614	0.852066	0.00960236	0.776158	0.44924	1.34098	0.363724	0.562988	0.87218	0.268868	345	75	270
BRIX1	0.68909	0.472744	1.00445	0.0527582	0.605783	0.390101	0.940713	0.0256058	0.539048	0.293233	0.816038	345	268	77
BRMS1	0.669817	0.476064	0.942426	0.0214289	0.580521	0.398045	0.846649	0.00473417	0.540396	0.473684	0.622642	345	203	142
BRMS1L	1.73308	1.17753	2.55074	0.00529222	1.58575	1.05343	2.38707	0.0271465	0.550291	0.736842	0.400943	345	225	120
BRP44	1.24341	0.851209	1.81632	0.259842	1.34834	0.905906	2.00684	0.140765	0.471095	0.285714	0.726415	345	96	249
BRP44L	0.749064	0.515051	1.0894	0.13056	0.710886	0.474184	1.06575	0.0985844	0.529224	0.706767	0.410377	345	127	218
BRPF1	0.666906	0.441464	1.00747	0.0542801	0.840272	0.541895	1.30294	0.436809	0.517166	0.225564	0.830189	345	280	65
BRPF3	1.47762	0.99574	2.1927	0.0525298	1.41934	0.939545	2.14416	0.0961711	0.578557	0.75188	0.40566	345	226	119
BRS3	0.875365	0.518949	1.47657	0.617773	0.849576	0.484239	1.49054	0.569789	0.465243	0.887218	0.146226	345	47	298
BRSK1	1.22411	0.869968	1.72241	0.245838	1.14229	0.78284	1.66679	0.490161	0.545822	0.458647	0.632075	345	139	206
BRSK2	1.32538	0.941763	1.86525	0.106138	1.11574	0.76639	1.62433	0.567653	0.522007	0.533835	0.542453	345	168	177
BRWD1	1.7184	1.21243	2.43553	0.00234663	1.60578	1.1052	2.3331	0.0129654	0.541141	0.390977	0.745283	345	106	239
BRWD3	0.799689	0.516849	1.23731	0.31549	0.838591	0.531647	1.32275	0.449024	0.52933	0.819549	0.264151	345	81	264
BSCL2	0.737039	0.522736	1.0392	0.0817495	0.704509	0.479514	1.03508	0.0743686	0.507554	0.56391	0.504717	345	166	179
BSDC1	0.717563	0.471908	1.09109	0.120608	0.73994	0.469909	1.16514	0.193546	0.531352	0.218045	0.853774	345	286	59
BSG	0.708595	0.451735	1.11151	0.133689	0.691712	0.426648	1.12145	0.134906	0.503972	0.180451	0.877358	345	296	49
BSN	1.61688	1.10545	2.36491	0.0132596	1.35497	0.889507	2.06401	0.157159	0.580401	0.721805	0.457547	345	211	134
BSND	0.596837	0.147515	2.41476	0.469234	0.908421	0.215937	3.82163	0.895754	0.479217	0.992481	0.0283019	345	8	337
BSPH1									0.490726	0	1	345	345	0
BSPRY	0.595136	0.413716	0.85611	0.0051518	0.728142	0.475242	1.11562	0.145015	0.576997	0.330827	0.806604	345	261	84
BST1	1.62972	1.14439	2.32087	0.00677579	1.39251	0.946965	2.04767	0.0923791	0.54983	0.368421	0.75	345	102	243
BST2	0.692546	0.487376	0.984088	0.0404187	0.745389	0.492868	1.12729	0.163842	0.523514	0.631579	0.476415	345	151	194
BSX	0.862931	0.274439	2.71335	0.800874	0.7187	0.218385	2.36523	0.586792	0.492127	0.984962	0.0235849	345	8	337
BTAF1	1.20459	0.839482	1.7285	0.312352	1.10016	0.749678	1.61449	0.625727	0.509682	0.338346	0.726415	345	103	242
BTBD1	0.803073	0.555325	1.16135	0.24393	0.972685	0.648208	1.45959	0.893601	0.507838	0.699248	0.377358	345	121	224
BTBD10	0.8618	0.61015	1.21724	0.39857	0.804808	0.556454	1.164	0.248763	0.501915	0.578947	0.476415	345	158	187
BTBD11	1.24725	0.88561	1.75656	0.206003	1.07164	0.747863	1.53559	0.706189	0.533604	0.556391	0.528302	345	174	171
BTBD12	0.542928	0.336667	0.875556	0.0122445	0.594122	0.360277	0.979749	0.0413374	0.522982	0.157895	0.910377	345	306	39
BTBD16	1.22729	0.870596	1.73013	0.242402	1.31255	0.916353	1.88004	0.137946	0.511775	0.556391	0.528302	345	174	171
BTBD17	1.59483	1.12972	2.25143	0.00797137	1.59704	1.10752	2.30294	0.0121839	0.560399	0.578947	0.584906	345	165	180
BTBD18	1.14934	0.780496	1.6925	0.480871	1.01057	0.643327	1.58746	0.963601	0.501312	0.263158	0.79717	345	78	267
BTBD19	1.72393	1.21642	2.44319	0.00220492	1.49773	1.03547	2.16634	0.0319464	0.571003	0.398496	0.764151	345	103	242
BTBD2	0.726055	0.516412	1.0208	0.065546	0.745449	0.521959	1.06463	0.106191	0.511491	0.526316	0.551887	345	181	164
BTBD3	0.711578	0.504795	1.00307	0.0520796	0.698545	0.488569	0.998764	0.0492129	0.546354	0.443609	0.674528	345	218	127
BTBD6	1.48159	1.00557	2.18295	0.0468055	1.52689	1.01535	2.29615	0.042036	0.537878	0.736842	0.377358	345	230	115
BTBD7	1.38575	0.982995	1.95353	0.0625932	1.41712	0.979329	2.05063	0.0644331	0.525961	0.43609	0.650943	345	132	213
BTBD8	3.37564	1.37973	8.25884	0.00769643	3.83882	1.52359	9.67221	0.00433028	0.518354	0.962406	0.136792	345	311	34
BTBD9	1.14488	0.788124	1.66312	0.477594	1.26928	0.852314	1.89022	0.240591	0.516527	0.300752	0.792453	345	84	261
BTC	1.35613	0.94118	1.95403	0.102117	1.72977	1.16028	2.57876	0.00715311	0.539225	0.323308	0.79717	345	86	259
BTD	1.54205	1.02629	2.31701	0.0370807	1.79923	1.16893	2.76939	0.0076007	0.553235	0.774436	0.34434	345	242	103
BTF3	1.40254	0.831654	2.36529	0.204567	1.3019	0.753587	2.24916	0.344267	0.492233	0.879699	0.165094	345	294	51
BTF3L1	1.13663	0.158635	8.14401	0.898571	1.30408	0.177916	9.55862	0.79391	0.480919	1	0.00471698	345	2	343
BTF3L4	1.51076	0.929191	2.45633	0.0961479	1.47323	0.866695	2.50423	0.152311	0.509079	0.857143	0.212264	345	281	64
BTG1	2.60466	1.06445	6.37352	0.0360151	2.0026	0.793091	5.05666	0.141714	0.507235	0.962406	0.0990566	345	319	26
BTG2	1.452	1.02284	2.06122	0.0369522	1.71661	1.15972	2.54091	0.00692276	0.525536	0.609023	0.514151	345	184	161
BTG3	0.723804	0.513567	1.0201	0.0648532	0.759629	0.521437	1.10663	0.152095	0.559689	0.556391	0.599057	345	187	158
BTG4	2.00409	0.278577	14.4175	0.489874	1.30167	0.167394	10.1219	0.801087	0.478543	1	0.00471698	345	2	343
BTK	1.51181	1.06934	2.13737	0.0193115	1.44465	0.990213	2.10764	0.0562713	0.533622	0.406015	0.707547	345	116	229
BTLA	0.87249	0.481638	1.58052	0.652741	0.675118	0.362746	1.25648	0.215133	0.482302	0.0977444	0.929245	345	318	27
BTN1A1	1.28968	0.917534	1.81276	0.143059	1.26791	0.89673	1.79273	0.179216	0.513583	0.503759	0.575472	345	157	188
BTN2A1	1.20245	0.854561	1.69198	0.290047	1.1489	0.797903	1.6543	0.45553	0.531316	0.526316	0.551887	345	165	180
BTN2A2	1.19466	0.848922	1.68121	0.307562	1.23793	0.856367	1.78951	0.25627	0.512058	0.526316	0.537736	345	168	177
BTN2A3	0.743645	0.499111	1.10799	0.145418	0.61985	0.40227	0.955115	0.0301476	0.50532	0.24812	0.825472	345	276	69
BTN3A1	1.35776	0.958967	1.9224	0.0847425	1.34236	0.928494	1.94071	0.117469	0.522308	0.601504	0.495283	345	187	158
BTN3A2	1.60382	1.13009	2.27614	0.00817717	1.62394	1.1203	2.35398	0.0104771	0.513619	0.390977	0.716981	345	112	233
BTN3A3	1.66568	1.18166	2.34796	0.00358114	1.74403	1.19313	2.5493	0.00408368	0.546638	0.43609	0.688679	345	124	221
BTNL2	0.579813	0.183732	1.82974	0.352597	0.493145	0.135386	1.79629	0.283771	0.474482	0.984962	0.0424528	345	12	333
BTNL3	1.90026	1.13773	3.17385	0.0141668	1.83444	1.0633	3.16481	0.0292159	0.513193	0.87218	0.231132	345	279	66
BTNL8	1.28306	0.880111	1.87048	0.194994	1.27484	0.85196	1.90763	0.237664	0.516403	0.706767	0.358491	345	230	115
BTNL9	0.846367	0.600098	1.1937	0.34173	0.701044	0.491431	1.00007	0.0500425	0.47872	0.578947	0.462264	345	155	190
BTRC	1.43588	1.02061	2.0201	0.0377905	1.63556	1.14157	2.3433	0.00732575	0.519294	0.473684	0.636792	345	140	205
BUB1	0.681357	0.482887	0.961398	0.0289579	0.768341	0.528372	1.1173	0.167773	0.545432	0.56391	0.556604	345	177	168
BUB1B	0.741049	0.523966	1.04807	0.0901739	0.802503	0.543517	1.1849	0.26845	0.542382	0.586466	0.523585	345	167	178
BUB3	0.799549	0.568629	1.12425	0.198275	0.964346	0.657903	1.41353	0.852381	0.541141	0.496241	0.599057	345	195	150
BUD13	0.761511	0.539081	1.07572	0.122143	0.809484	0.556933	1.17656	0.267958	0.551107	0.421053	0.688679	345	224	121
BUD31	0.848281	0.592904	1.21366	0.367918	0.771765	0.530528	1.12269	0.175488	0.527522	0.353383	0.735849	345	243	102
BVES	1.60613	1.04546	2.46749	0.0305502	1.1115	0.69999	1.76492	0.654105	0.558945	0.804511	0.316038	345	252	93
BYSL	0.5259	0.354406	0.780379	0.00141565	0.449278	0.283663	0.711587	0.000649178	0.519258	0.255639	0.877358	345	286	59
BZRAP1	1.36743	0.972615	1.92251	0.0718247	1.32852	0.924582	1.90892	0.124545	0.525181	0.511278	0.589623	345	155	190
BZW1	1.24649	0.882948	1.75972	0.210435	1.17785	0.817902	1.6962	0.379026	0.502944	0.578947	0.462264	345	191	154
BZW2	0.751701	0.532309	1.06152	0.105034	0.837688	0.570532	1.22994	0.366102	0.535998	0.586466	0.509434	345	164	181
C10orf10	1.85234	1.29546	2.6486	0.000727939	1.5442	1.04657	2.27843	0.0285725	0.59324	0.353383	0.830189	345	83	262
C10orf105	1.59146	1.0736	2.35909	0.0206905	1.34562	0.893434	2.02666	0.155408	0.568254	0.75188	0.391509	345	229	116
C10orf107	1.56984	1.1098	2.22057	0.0108111	1.58999	1.06352	2.37705	0.0238126	0.524312	0.593985	0.523585	345	180	165
C10orf108	1.97603	1.0043	3.88798	0.0485643	1.81211	0.887321	3.70072	0.102718	0.52284	0.932331	0.15566	345	303	42
C10orf11	1.43007	0.918071	2.22759	0.113662	1.16432	0.699944	1.93679	0.55791	0.510356	0.819549	0.259434	345	266	79
C10orf110	1.22952	0.854375	1.76938	0.265908	1.02206	0.69096	1.51182	0.913009	0.527273	0.669173	0.433962	345	209	136
C10orf111	0.761889	0.451702	1.28508	0.307922	0.83444	0.48565	1.43373	0.512217	0.519116	0.887218	0.179245	345	54	291
C10orf113	0.941209	0.632186	1.40129	0.765403	0.926961	0.611102	1.40608	0.721259	0.500745	0.766917	0.245283	345	84	261
C10orf114	1.69372	1.20123	2.38812	0.00264843	1.51298	1.03728	2.20681	0.0315525	0.554671	0.541353	0.613208	345	154	191
C10orf116	0.830976	0.587389	1.17558	0.295526	0.722958	0.496536	1.05263	0.0905736	0.521812	0.601504	0.495283	345	159	186
C10orf118	0.727666	0.507602	1.04314	0.0836071	0.674287	0.462148	0.983803	0.0408859	0.529508	0.669173	0.424528	345	135	210
C10orf119	0.826507	0.575317	1.18737	0.302609	0.972688	0.655801	1.4427	0.890492	0.501099	0.676692	0.386792	345	126	219
C10orf12	1.30477	0.925445	1.83957	0.129046	1.7496	1.20527	2.53978	0.00326285	0.521351	0.556391	0.561321	345	167	178
C10orf120	1.52234	0.212445	10.9088	0.675761	1.45145	0.197021	10.6928	0.714625	0.468506	1	0.00471698	345	2	343
C10orf122									0.473755	0	1	345	345	0
C10orf125	1.11114	0.748965	1.64846	0.600511	1.17356	0.768009	1.79326	0.45942	0.489502	0.24812	0.783019	345	79	266
C10orf128	1.55785	1.03193	2.35178	0.0348972	1.33403	0.845131	2.10576	0.215908	0.557685	0.781955	0.325472	345	247	98
C10orf129	0.823605	0.55968	1.21199	0.324841	0.767624	0.510766	1.15365	0.203264	0.522379	0.744361	0.316038	345	102	243
C10orf131	1.23382	0.806486	1.88758	0.332763	1.24961	0.788623	1.98007	0.342711	0.519418	0.203008	0.863208	345	56	289
C10orf137	0.700543	0.489863	1.00183	0.0511831	0.721926	0.494022	1.05497	0.0922794	0.521563	0.368421	0.70283	345	234	111
C10orf140	1.35318	0.947244	1.93308	0.0964881	1.19584	0.794251	1.80048	0.39165	0.518123	0.639098	0.419811	345	208	137
C10orf18	1.38719	0.959734	2.00503	0.0816316	1.38352	0.94339	2.02898	0.0965787	0.526777	0.308271	0.783019	345	87	258
C10orf2	0.688978	0.467436	1.01552	0.0598146	0.75731	0.493521	1.1621	0.203245	0.545042	0.270677	0.834906	345	275	70
C10orf25	1.86997	1.31398	2.6612	0.0005076	1.96839	1.34943	2.87128	0.000438543	0.606717	0.631579	0.580189	345	173	172
C10orf26	1.56382	1.11178	2.19967	0.0102084	1.52584	1.0449	2.22815	0.0287188	0.566428	0.518797	0.636792	345	146	199
C10orf27	1.48711	1.05534	2.09553	0.023343	1.34613	0.939258	1.92925	0.105512	0.553057	0.556391	0.561321	345	167	178
C10orf28	1.35449	0.886134	2.0704	0.161043	1.56684	1.0057	2.44107	0.0471328	0.527823	0.203008	0.872642	345	54	291
C10orf32	1.56029	1.08142	2.25122	0.0173845	1.451	0.98393	2.13979	0.0603504	0.537736	0.684211	0.415094	345	215	130
C10orf35	0.59636	0.401614	0.88554	0.0103895	0.625849	0.416569	0.94027	0.0240386	0.543446	0.75188	0.382075	345	115	230
C10orf4	0.834036	0.591879	1.17527	0.299698	0.823719	0.570273	1.1898	0.301299	0.505781	0.451128	0.608491	345	203	142
C10orf40	1.36574	0.190627	9.78482	0.756374	1.53724	0.207272	11.401	0.674048	0.475582	1	0.00471698	345	2	343
C10orf41	1.47906	0.888237	2.46288	0.132471	0.982669	0.567576	1.70134	0.950224	0.502873	0.87218	0.188679	345	288	57
C10orf46	1.15546	0.813115	1.64194	0.420246	1.514	1.03554	2.21353	0.0323407	0.498688	0.62406	0.448113	345	200	145
C10orf47	1.39061	0.983328	1.96659	0.062198	1.52356	1.02691	2.2604	0.0364477	0.531707	0.593985	0.509434	345	183	162
C10orf50	1.52833	1.0005	2.33465	0.0497323	1.53112	0.977104	2.39927	0.0630423	0.545467	0.203008	0.900943	345	48	297
C10orf53									0.456377	0	1	345	345	0
C10orf54	0.756337	0.521607	1.0967	0.14073	0.632731	0.42379	0.944685	0.0252063	0.494219	0.308271	0.764151	345	255	90
C10orf55	1.12404	0.792574	1.59414	0.51187	1.14628	0.78689	1.66981	0.476909	0.510462	0.609023	0.45283	345	197	148
C10orf57	0.643091	0.391128	1.05737	0.0818426	0.994056	0.588771	1.67832	0.982201	0.517485	0.87218	0.216981	345	64	281
C10orf58	0.85206	0.603624	1.20274	0.36266	0.911184	0.613401	1.35353	0.645038	0.507341	0.428571	0.641509	345	213	132
C10orf62	1.47571	1.04004	2.09387	0.0292652	1.56868	1.08751	2.26276	0.0160069	0.562722	0.390977	0.740566	345	107	238
C10orf67	0.829626	0.47641	1.44472	0.509275	0.940903	0.523661	1.69059	0.838555	0.510427	0.902256	0.146226	345	45	300
C10orf68	0.852319	0.602699	1.20532	0.366121	0.87883	0.594085	1.30005	0.517946	0.485175	0.413534	0.669811	345	221	124
C10orf71									0.463683	0	1	345	345	0
C10orf72	1.66334	1.16208	2.38081	0.00542021	1.42419	0.959293	2.11438	0.0794588	0.572954	0.654135	0.490566	345	195	150
C10orf75	1.33472	0.936569	1.90212	0.110178	1.12722	0.776657	1.63602	0.528633	0.515286	0.639098	0.429245	345	206	139
C10orf76	1.19271	0.832005	1.70979	0.337528	1.6213	1.0932	2.40451	0.0162561	0.499858	0.338346	0.735849	345	101	244
C10orf78	0.724031	0.500827	1.04671	0.0859425	0.808891	0.545916	1.19855	0.290422	0.540396	0.323308	0.783019	345	257	88
C10orf79	1.47421	0.946594	2.29591	0.0859535	1.59008	0.99579	2.53903	0.0521011	0.515995	0.819549	0.283019	345	261	84
C10orf81	0.679063	0.48133	0.958026	0.0275129	0.645909	0.443629	0.940421	0.022581	0.547454	0.571429	0.537736	345	172	173
C10orf82	1.41005	1.00031	1.98761	0.0497905	1.55046	1.04614	2.2979	0.0289148	0.547844	0.443609	0.669811	345	129	216
C10orf84	1.25585	0.855812	1.84289	0.244326	1.11456	0.749903	1.65653	0.591659	0.512768	0.729323	0.339623	345	237	108
C10orf88	1.592	1.01518	2.49657	0.0428047	1.71443	1.08075	2.71964	0.0220312	0.530678	0.827068	0.268868	345	265	80
C10orf90	1.98707	1.33226	2.96372	0.000761565	1.84621	1.20487	2.82892	0.00486375	0.555327	0.240602	0.891509	345	55	290
C10orf91	0.788528	0.551154	1.12814	0.19354	0.754496	0.518824	1.09722	0.140381	0.530465	0.353383	0.735849	345	243	102
C10orf93	1.14065	0.811469	1.60337	0.44876	1.06649	0.739445	1.53817	0.730473	0.518762	0.488722	0.580189	345	154	191
C10orf95	1.08223	0.764559	1.53189	0.655791	1.20049	0.816714	1.7646	0.352493	0.495389	0.601504	0.424528	345	202	143
C10orf96									0.493758	0	1	345	345	0
C10orf99	0.750962	0.450511	1.25179	0.271962	0.648089	0.377355	1.11306	0.115999	0.536778	0.879699	0.207547	345	61	284
C11orf1	0.72613	0.50295	1.04834	0.0876379	0.881407	0.599191	1.29655	0.521471	0.520393	0.323308	0.745283	345	249	96
C11orf10	0.828335	0.58912	1.16468	0.278725	0.821559	0.578533	1.16668	0.272013	0.536565	0.518797	0.59434	345	191	154
C11orf16	0.964592	0.671838	1.38491	0.845118	0.911775	0.628523	1.32268	0.626538	0.48498	0.676692	0.367925	345	122	223
C11orf17	0.780995	0.54858	1.11188	0.170209	0.743955	0.505113	1.09573	0.134345	0.567705	0.639098	0.485849	345	152	193
C11orf2	1.03695	0.735914	1.46112	0.835722	1.14152	0.798287	1.63234	0.468226	0.497021	0.56391	0.471698	345	187	158
C11orf20	0.798042	0.552132	1.15348	0.230028	0.795556	0.518074	1.22166	0.295972	0.525358	0.699248	0.391509	345	124	221
C11orf21	1.35967	0.965789	1.91418	0.0783229	1.32451	0.912477	1.92259	0.139352	0.52933	0.526316	0.566038	345	162	183
C11orf24	0.75674	0.537062	1.06627	0.111119	0.67346	0.469017	0.967019	0.0322219	0.471875	0.496241	0.556604	345	186	159
C11orf30	1.23187	0.864203	1.75597	0.248906	1.11179	0.765433	1.61486	0.577938	0.499291	0.639098	0.433962	345	205	140
C11orf31	0.887417	0.586691	1.34229	0.571595	0.908519	0.588958	1.40147	0.664428	0.519755	0.789474	0.273585	345	87	258
C11orf34	1.38372	0.92924	2.06049	0.109884	1.23265	0.805557	1.88617	0.335184	0.514186	0.240602	0.830189	345	68	277
C11orf35	0.595793	0.405272	0.87588	0.00843752	0.540194	0.354929	0.822163	0.0040565	0.567208	0.278195	0.867925	345	281	64
C11orf36	1.47648	0.364377	5.9828	0.585191	1.56332	0.360907	6.77173	0.550252	0.477905	0.992481	0.00943396	345	4	341
C11orf40	1.12122	0.277066	4.53733	0.872549	0.595018	0.132775	2.66652	0.497524	0.502908	0.992481	0.0188679	345	6	339
C11orf41	1.7661	1.25163	2.49205	0.00120575	1.75416	1.2185	2.5253	0.00250324	0.552667	0.443609	0.712264	345	120	225
C11orf42	1.36071	0.836491	2.21346	0.214697	1.47899	0.882653	2.47822	0.137278	0.499202	0.142857	0.919811	345	36	309
C11orf45	1.36911	0.822169	2.27991	0.227273	1.12183	0.656679	1.91645	0.673948	0.495921	0.87218	0.183962	345	289	56
C11orf46	0.975327	0.693457	1.37177	0.88585	0.922311	0.629896	1.35047	0.677651	0.500638	0.518797	0.54717	345	181	164
C11orf48	0.657822	0.464026	0.932555	0.0186671	0.746628	0.513205	1.08622	0.126616	0.546922	0.398496	0.754717	345	241	104
C11orf49	0.814398	0.573681	1.15612	0.250781	0.931484	0.647081	1.34089	0.702573	0.530536	0.62406	0.476415	345	152	193
C11orf51	0.631805	0.422162	0.945556	0.0256082	0.655757	0.433169	0.992724	0.0460997	0.531423	0.774436	0.330189	345	101	244
C11orf52	0.810684	0.546516	1.20254	0.296851	0.974918	0.647143	1.46871	0.903298	0.536849	0.759398	0.320755	345	101	244
C11orf53	1.16167	0.824191	1.63734	0.392112	1.11494	0.762706	1.62984	0.574369	0.500301	0.56391	0.485849	345	184	161
C11orf54	0.854089	0.543909	1.34116	0.493321	0.942525	0.585216	1.51799	0.807669	0.512342	0.180451	0.867925	345	294	51
C11orf57	0.635934	0.450578	0.89754	0.0100283	0.736331	0.514541	1.05372	0.0941693	0.572918	0.586466	0.566038	345	176	169
C11orf58	0.83518	0.582973	1.1965	0.326143	0.720524	0.484971	1.07049	0.104642	0.516598	0.669173	0.438679	345	138	207
C11orf59	1.25941	0.829068	1.91314	0.279597	1.32003	0.849514	2.05116	0.216936	0.492375	0.789474	0.240566	345	266	79
C11orf61	1.72689	1.2084	2.46785	0.00270758	1.43253	0.96828	2.11936	0.0720719	0.514151	0.353383	0.778302	345	94	251
C11orf63	2.71856	1.53312	4.82062	0.000621403	2.08643	1.11005	3.92161	0.0223578	0.583806	0.902256	0.259434	345	277	68
C11orf64									0.512129	0.977444	0.0471698	345	345	0
C11orf65	1.37485	0.922969	2.04797	0.117415	1.36267	0.885052	2.09804	0.159904	0.507164	0.759398	0.287736	345	252	93
C11orf66	1.40326	0.996032	1.97699	0.0527173	1.28869	0.892793	1.86014	0.175611	0.55022	0.556391	0.561321	345	167	178
C11orf67	0.878766	0.624099	1.23735	0.459185	0.853602	0.591594	1.23165	0.397456	0.474606	0.503759	0.561321	345	186	159
C11orf68	0.944616	0.669669	1.33245	0.745459	0.990277	0.671337	1.46074	0.960708	0.477408	0.473684	0.561321	345	190	155
C11orf70	1.46565	1.0404	2.0647	0.0287793	1.11304	0.744855	1.66322	0.601266	0.547329	0.458647	0.669811	345	131	214
C11orf71	1.8661	1.00629	3.46057	0.0477185	2.05628	1.07849	3.92056	0.0285645	0.480848	0.917293	0.174528	345	297	48
C11orf73	0.917479	0.649213	1.2966	0.62551	0.845848	0.582289	1.2287	0.379497	0.511917	0.571429	0.509434	345	166	179
C11orf74	1.66083	1.16704	2.36354	0.00483237	1.54004	1.03245	2.29719	0.0343039	0.542985	0.631579	0.495283	345	191	154
C11orf75	3.04019	1.24248	7.43896	0.0148706	2.62014	1.0523	6.52392	0.0385004	0.496418	0.962406	0.117925	345	315	30
C11orf80	1.46924	1.02072	2.11483	0.0384214	1.17099	0.786048	1.74445	0.437634	0.533001	0.323308	0.768868	345	92	253
C11orf82	0.500651	0.345227	0.726047	0.000264265	0.52071	0.353507	0.766997	0.000958515	0.58831	0.706767	0.481132	345	142	203
C11orf83	0.735554	0.502931	1.07577	0.113326	0.674055	0.449715	1.01031	0.0560948	0.520287	0.285714	0.79717	345	265	80
C11orf84	0.767559	0.539492	1.09204	0.141419	0.680706	0.464262	0.998057	0.0488471	0.525287	0.639098	0.448113	345	144	201
C11orf85	0.926723	0.644259	1.33303	0.681611	0.82855	0.567228	1.21026	0.33063	0.508902	0.684211	0.358491	345	119	226
C11orf86	0.793362	0.562027	1.11992	0.188155	0.693392	0.481747	0.998019	0.0487655	0.502979	0.586466	0.509434	345	164	181
C11orf87	1.52655	1.06424	2.18968	0.0215494	1.49918	1.00829	2.22907	0.0454189	0.537062	0.661654	0.462264	345	202	143
C11orf88	1.47065	1.04075	2.07814	0.0287892	1.26549	0.871829	1.83691	0.215529	0.57024	0.56391	0.570755	345	166	179
C11orf9	0.66644	0.450734	0.985377	0.0419724	0.718902	0.466653	1.1075	0.134432	0.507129	0.263158	0.811321	345	271	74
C11orf90	0.76802	0.527876	1.11741	0.167691	0.723691	0.486857	1.07573	0.109821	0.499539	0.300752	0.768868	345	257	88
C11orf92	1.13771	0.74531	1.73671	0.549946	0.907461	0.570101	1.44445	0.682218	0.504079	0.796992	0.264151	345	262	83
C11orf93	0.757431	0.535329	1.07168	0.116648	0.825856	0.570829	1.19482	0.309928	0.518903	0.601504	0.495283	345	159	186
C11orf94									0.474128	0	1	345	345	0
C11orf95	1.53438	1.07959	2.18076	0.01699	1.28448	0.855971	1.9275	0.226678	0.550858	0.62406	0.5	345	189	156
C12orf10	0.786014	0.544992	1.13363	0.197508	0.878463	0.590555	1.30673	0.522459	0.538091	0.691729	0.40566	345	128	217
C12orf11	0.832578	0.591334	1.17224	0.293898	1.04925	0.711564	1.54718	0.808307	0.539474	0.533835	0.580189	345	186	159
C12orf12	0.902796	0.560177	1.45497	0.674515	1.07447	0.654907	1.76283	0.776138	0.500142	0.857143	0.188679	345	60	285
C12orf23	1.28135	0.904094	1.81602	0.163521	1.14853	0.796235	1.6567	0.458761	0.53121	0.609023	0.471698	345	193	152
C12orf24	1.39247	0.987861	1.9628	0.0587264	1.52749	1.05613	2.20922	0.0244457	0.548198	0.548872	0.575472	345	163	182
C12orf26	2.34407	1.0944	5.02071	0.0283744	2.85778	1.26823	6.43959	0.0113017	0.50688	0.947368	0.136792	345	309	36
C12orf27	1.47946	1.02028	2.14528	0.0388403	1.44066	0.962579	2.1562	0.0759656	0.51064	0.300752	0.783019	345	86	259
C12orf29	1.13664	0.787051	1.64149	0.494622	1.20245	0.824247	1.7542	0.338652	0.521386	0.691729	0.377358	345	122	223
C12orf32	0.821256	0.574824	1.17334	0.27934	0.95997	0.653822	1.40947	0.834853	0.538161	0.360902	0.754717	345	246	99
C12orf34	0.677783	0.48084	0.95539	0.026384	0.510891	0.345623	0.755186	0.000756678	0.521776	0.458647	0.632075	345	207	138
C12orf35	1.33331	0.946967	1.87726	0.0993891	1.25209	0.871501	1.79888	0.223979	0.541141	0.541353	0.580189	345	161	184
C12orf36	1.35985	0.959257	1.92775	0.0842856	1.42161	0.98326	2.05539	0.0614541	0.513601	0.609023	0.471698	345	193	152
C12orf39	1.20785	0.168646	8.65066	0.850881	0.896736	0.118781	6.76989	0.915838	0.490743	1	0.00471698	345	2	343
C12orf4	1.20139	0.853495	1.69108	0.292884	1.1649	0.80707	1.68137	0.41497	0.514328	0.496241	0.570755	345	157	188
C12orf40	1.13663	0.158635	8.14401	0.898571	1.30408	0.177916	9.55862	0.79391	0.462282	1	0.00471698	345	2	343
C12orf41	0.740337	0.517067	1.06002	0.100652	0.74024	0.510391	1.0736	0.112831	0.524259	0.353383	0.764151	345	249	96
C12orf42	2.27762	1.28345	4.04189	0.00491259	2.2399	1.23987	4.04651	0.00752936	0.545875	0.902256	0.216981	345	286	59
C12orf43	0.726591	0.512033	1.03106	0.0736646	0.934393	0.630621	1.38449	0.735172	0.534792	0.390977	0.726415	345	236	109
C12orf44	0.518933	0.271582	0.991564	0.0470768	0.607071	0.303766	1.21322	0.157701	0.524578	0.932331	0.160377	345	44	301
C12orf45	0.795875	0.564947	1.1212	0.191643	0.876472	0.608372	1.26272	0.479086	0.548234	0.56391	0.561321	345	178	167
C12orf47	0.674512	0.42308	1.07537	0.0980002	0.716637	0.441385	1.16354	0.177845	0.550858	0.849624	0.259434	345	76	269
C12orf48	0.665141	0.470023	0.941258	0.0213529	0.819334	0.557859	1.20337	0.309614	0.593949	0.601504	0.575472	345	176	169
C12orf49	0.715372	0.508453	1.0065	0.0545078	0.704238	0.483032	1.02675	0.0683406	0.539899	0.503759	0.613208	345	197	148
C12orf5	0.600119	0.417384	0.862858	0.00584897	0.556431	0.37617	0.823071	0.00333817	0.57306	0.676692	0.471698	345	144	201
C12orf50	0.922633	0.600899	1.41663	0.712831	0.90804	0.579214	1.42355	0.674109	0.492552	0.81203	0.20283	345	69	276
C12orf51	1.18154	0.836895	1.6681	0.343109	1.27047	0.875626	1.84335	0.207463	0.508015	0.421053	0.660377	345	128	217
C12orf52	0.613752	0.436644	0.862696	0.00495142	0.652198	0.449611	0.946067	0.024316	0.553057	0.518797	0.608491	345	194	151
C12orf53	1.50952	1.07364	2.12236	0.0178514	1.20758	0.819668	1.77907	0.340039	0.573663	0.511278	0.617925	345	149	196
C12orf54	0.961447	0.62961	1.46818	0.855565	0.728015	0.45916	1.1543	0.177078	0.512271	0.804511	0.226415	345	75	270
C12orf56	1.41048	0.989926	2.00969	0.0569216	1.12871	0.750054	1.69853	0.561471	0.507962	0.368421	0.698113	345	113	232
C12orf57	1.41269	0.984116	2.02792	0.0610467	1.63202	1.10115	2.41882	0.0146889	0.532664	0.669173	0.443396	345	207	138
C12orf59	1.64494	1.15782	2.33701	0.00547258	1.53564	1.06065	2.22335	0.0230973	0.562775	0.62406	0.537736	345	181	164
C12orf60	0.666595	0.469761	0.945904	0.0231207	0.719588	0.491533	1.05345	0.0906088	0.572634	0.62406	0.556604	345	169	176
C12orf61	1.66349	1.14663	2.41333	0.00734698	1.71907	1.14629	2.57807	0.00878636	0.520464	0.300752	0.801887	345	82	263
C12orf62	0.88148	0.617158	1.25901	0.487931	0.892879	0.614325	1.29774	0.552585	0.533196	0.654135	0.438679	345	140	205
C12orf63	1.38748	0.961237	2.00275	0.0803172	1.14978	0.779247	1.69651	0.48191	0.556072	0.684211	0.443396	345	209	136
C12orf65	0.781052	0.532504	1.14561	0.206084	0.84763	0.562452	1.2774	0.429534	0.551213	0.278195	0.830189	345	273	72
C12orf66	0.848845	0.602171	1.19657	0.349522	0.943416	0.657968	1.3527	0.751385	0.543801	0.451128	0.646226	345	211	134
C12orf68	1.70099	1.20433	2.40246	0.00256707	1.51101	1.03043	2.21573	0.0345635	0.569478	0.428571	0.712264	345	118	227
C12orf69	1.38666	0.985436	1.95126	0.0606856	1.30363	0.91044	1.86662	0.147705	0.519506	0.466165	0.608491	345	145	200
C12orf70	0.82064	0.582176	1.15678	0.25911	0.800913	0.555945	1.15382	0.233325	0.497517	0.571429	0.5	345	164	181
C12orf71	1.24882	0.884432	1.76333	0.206846	1.24296	0.864183	1.78777	0.240862	0.526511	0.578947	0.523585	345	178	167
C12orf72	1.34059	0.906626	1.98227	0.141898	1.84447	1.19664	2.843	0.00555122	0.50915	0.744361	0.334906	345	240	105
C12orf73	0.991942	0.690486	1.42501	0.965084	0.949239	0.647314	1.39199	0.789692	0.514435	0.676692	0.396226	345	128	217
C12orf74	1.19762	0.843223	1.70096	0.313751	1.18934	0.827226	1.70996	0.349254	0.509505	0.398496	0.669811	345	123	222
C12orf75	1.3789	0.903255	2.10502	0.136607	1.1939	0.762823	1.86858	0.438089	0.494928	0.796992	0.259434	345	263	82
C12orf76	0.6713	0.439667	1.02497	0.0649277	0.601101	0.378926	0.953543	0.0306161	0.542134	0.804511	0.306604	345	92	253
C12orf77	0.77454	0.504287	1.18962	0.243251	0.81331	0.516119	1.28163	0.373154	0.496489	0.81203	0.264151	345	82	263
C13orf1	0.68631	0.48291	0.975382	0.0358209	0.630911	0.434969	0.915118	0.0152052	0.564123	0.390977	0.745283	345	240	105
C13orf15	1.44643	1.02822	2.03474	0.0340212	1.03874	0.719055	1.50054	0.839516	0.543304	0.473684	0.636792	345	140	205
C13orf16	0.836116	0.59417	1.17658	0.304444	0.782874	0.550302	1.11374	0.173507	0.505887	0.548872	0.518868	345	171	174
C13orf18	1.44932	1.01878	2.06181	0.0390716	1.08716	0.743607	1.58945	0.666278	0.546886	0.631579	0.485849	345	193	152
C13orf23	0.774686	0.537192	1.11718	0.171701	0.661622	0.442839	0.988494	0.0437518	0.533409	0.691729	0.410377	345	129	216
C13orf26	1.86938	0.259733	13.4546	0.534435	1.74373	0.230077	13.2156	0.590527	0.477834	1	0.00943396	345	3	342
C13orf27	0.797617	0.566063	1.12389	0.196211	0.712565	0.493251	1.02939	0.070978	0.528798	0.56391	0.533019	345	172	173
C13orf28									0.498581	0	1	345	345	0
C13orf29	1.25525	0.889718	1.77097	0.195471	1.25872	0.863968	1.83384	0.230759	0.534686	0.43609	0.650943	345	132	213
C13orf30	1.5615	1.10864	2.19935	0.0107676	1.42727	0.976741	2.0856	0.0660099	0.554547	0.443609	0.674528	345	128	217
C13orf31	1.42536	0.932669	2.17831	0.101453	0.957168	0.600614	1.52539	0.853929	0.514045	0.796992	0.254717	345	264	81
C13orf33	1.70997	1.13777	2.56992	0.00985405	1.35056	0.8735	2.08816	0.176485	0.566783	0.774436	0.358491	345	239	106
C13orf34	0.609815	0.432118	0.860586	0.00488886	0.627038	0.423814	0.927709	0.0195217	0.552915	0.43609	0.698113	345	224	121
C13orf35									0.515587	0.548872	0.523585	345	345	0
C13orf36	1.44684	1.02363	2.04504	0.0364183	1.33051	0.896508	1.9746	0.156302	0.542843	0.413534	0.683962	345	122	223
C13orf37	0.763764	0.542683	1.07491	0.122188	0.779132	0.526367	1.15328	0.212296	0.560044	0.526316	0.59434	345	190	155
C13orf38	1.28511	0.911175	1.8125	0.152785	0.969516	0.661037	1.42195	0.874119	0.522485	0.56391	0.537736	345	173	172
C13orf39									0.44822	0	1	345	345	0
C14orf1	0.631736	0.368916	1.08179	0.0942283	0.643683	0.365912	1.13232	0.126326	0.539935	0.894737	0.221698	345	62	283
C14orf101	0.758172	0.513257	1.11996	0.164281	0.733653	0.48405	1.11197	0.144357	0.513371	0.75188	0.330189	345	104	241
C14orf102	1.29563	0.882473	1.90221	0.186217	1.26795	0.848792	1.89411	0.246309	0.514577	0.270677	0.801887	345	78	267
C14orf104	0.919428	0.651805	1.29693	0.632218	1.05096	0.732009	1.5089	0.787639	0.546673	0.473684	0.627358	345	204	141
C14orf105	1.44893	1.02633	2.04555	0.0350582	1.47386	1.00074	2.17066	0.0495627	0.547666	0.571429	0.570755	345	167	178
C14orf106	0.778115	0.51515	1.17531	0.233149	0.855638	0.55664	1.31524	0.477235	0.519471	0.789474	0.311321	345	95	250
C14orf109	0.85947	0.589025	1.25409	0.432133	0.904471	0.611694	1.33738	0.614863	0.522805	0.293233	0.787736	345	262	83
C14orf115	1.27235	0.869859	1.86109	0.214461	1.30496	0.885185	1.92381	0.178914	0.500709	0.721805	0.316038	345	241	104
C14orf118	1.47436	1.04706	2.07603	0.0261952	1.31751	0.916279	1.89444	0.136722	0.556001	0.443609	0.683962	345	126	219
C14orf119	1.52636	0.986158	2.36246	0.0577723	1.13972	0.698521	1.8596	0.600565	0.516031	0.18797	0.877358	345	51	294
C14orf126	0.819035	0.567138	1.18281	0.287061	0.870683	0.588082	1.28909	0.48916	0.545822	0.323308	0.783019	345	257	88
C14orf128	1.81573	1.23564	2.66815	0.00238619	1.63959	1.06813	2.51678	0.0237337	0.542169	0.270677	0.834906	345	71	274
C14orf129	0.650948	0.451894	0.937681	0.0211385	0.687125	0.459453	1.02762	0.0676533	0.554086	0.684211	0.443396	345	137	208
C14orf132	1.61843	1.14852	2.28059	0.00593638	1.29117	0.866363	1.92428	0.209367	0.568662	0.548872	0.59434	345	159	186
C14orf135	1.42015	1.0077	2.0014	0.0450915	1.39569	0.981533	1.9846	0.0634272	0.559938	0.56391	0.556604	345	169	176
C14orf138	0.922985	0.619549	1.37503	0.693545	0.835064	0.549036	1.2701	0.399535	0.509363	0.766917	0.292453	345	94	251
C14orf139	1.73111	1.11954	2.67676	0.0135974	1.23711	0.779585	1.96314	0.366463	0.533657	0.81203	0.301887	345	256	89
C14orf142	0.821916	0.531768	1.27037	0.377362	0.903755	0.573337	1.4246	0.662957	0.539474	0.819549	0.273585	345	83	262
C14orf143	0.807692	0.57307	1.13837	0.222544	0.860454	0.586336	1.26273	0.442498	0.538871	0.518797	0.589623	345	190	155
C14orf145	1.22056	0.83721	1.77944	0.300105	1.04172	0.705565	1.53802	0.837114	0.524578	0.714286	0.363208	345	230	115
C14orf147	0.932704	0.635172	1.36961	0.722283	0.830091	0.54917	1.25471	0.376985	0.505887	0.278195	0.806604	345	268	77
C14orf148	1.42695	1.00896	2.01809	0.0443872	1.32755	0.922529	1.91038	0.127075	0.517946	0.593985	0.509434	345	183	162
C14orf149	1.73453	1.18049	2.5486	0.00503034	1.30359	0.865828	1.9627	0.20412	0.541247	0.729323	0.377358	345	229	116
C14orf153	0.850848	0.575915	1.25703	0.41727	0.874942	0.584482	1.30975	0.516306	0.520251	0.75188	0.339623	345	106	239
C14orf156	1.32868	0.943622	1.87086	0.103608	1.34995	0.932703	1.95386	0.111688	0.474961	0.458647	0.584906	345	149	196
C14orf159	1.45391	1.02541	2.06147	0.0356586	1.69436	1.1388	2.52094	0.00929167	0.566144	0.406015	0.726415	345	112	233
C14orf162	1.49408	1.05263	2.12067	0.0246405	1.43269	0.995791	2.06126	0.0527164	0.580597	0.616541	0.551887	345	177	168
C14orf165	0.779948	0.468554	1.29829	0.33912	0.693865	0.407338	1.18194	0.178665	0.529153	0.879699	0.188679	345	57	288
C14orf166	0.813644	0.56898	1.16351	0.258437	0.646056	0.439372	0.949967	0.0263577	0.500461	0.353383	0.740566	345	244	101
C14orf166B	1.29161	0.919176	1.81494	0.140381	1.34534	0.93925	1.927	0.105641	0.529206	0.503759	0.575472	345	157	188
C14orf167	0.851655	0.584144	1.24168	0.403876	0.929606	0.611633	1.41289	0.73254	0.52167	0.721805	0.363208	345	115	230
C14orf169	0.824118	0.539391	1.25914	0.371076	0.90211	0.576542	1.41152	0.651979	0.498971	0.804511	0.259434	345	82	263
C14orf174	1.65049	1.17293	2.3225	0.00403738	1.53803	1.04795	2.2573	0.0278616	0.549138	0.458647	0.70283	345	124	221
C14orf176	0.834415	0.591188	1.17771	0.303191	0.836752	0.581396	1.20426	0.337348	0.516527	0.443609	0.622642	345	207	138
C14orf177									0.487693	0	1	345	345	0
C14orf178	1.42666	1.00035	2.03465	0.0497766	1.39346	0.962919	2.01649	0.0784799	0.531884	0.360902	0.735849	345	104	241
C14orf179	1.42532	1.01298	2.0055	0.0419551	1.52739	1.0639	2.1928	0.0216937	0.49046	0.466165	0.613208	345	144	201
C14orf180									0.461661	0	1	345	345	0
C14orf181	0.745207	0.509696	1.08954	0.129144	0.687005	0.46192	1.02177	0.0637927	0.550078	0.729323	0.391509	345	120	225
C14orf182	0.688455	0.484277	0.978719	0.0375431	0.709401	0.488662	1.02985	0.0710293	0.521883	0.383459	0.75	345	242	103
C14orf183	1.18409	0.841149	1.66685	0.332802	1.23514	0.866708	1.7602	0.242619	0.502146	0.541353	0.528302	345	172	173
C14orf184	0.764846	0.543352	1.07663	0.124365	0.789419	0.548213	1.13675	0.203727	0.516509	0.473684	0.589623	345	196	149
C14orf19	1.32466	0.794634	2.20823	0.280888	1.3229	0.781504	2.23935	0.297429	0.486275	0.12782	0.915094	345	35	310
C14orf2	0.952062	0.677234	1.33842	0.777426	0.853802	0.593817	1.22761	0.393603	0.49734	0.518797	0.537736	345	179	166
C14orf21	0.565622	0.402093	0.795657	0.00106458	0.628384	0.439356	0.898741	0.0109368	0.541034	0.496241	0.636792	345	203	142
C14orf23	0.917129	0.494215	1.70194	0.783906	1.15567	0.600201	2.2252	0.66515	0.503511	0.924812	0.0943396	345	31	314
C14orf28	1.55086	1.08198	2.22292	0.0168972	1.56946	1.04825	2.34983	0.0286134	0.518832	0.338346	0.759434	345	96	249
C14orf33	1.59018	1.07117	2.36064	0.0213892	1.47679	0.97744	2.23124	0.0640845	0.528727	0.744361	0.363208	345	234	111
C14orf34	1.20543	0.854032	1.70142	0.287965	1.25653	0.859146	1.83771	0.239087	0.50892	0.578947	0.490566	345	185	160
C14orf37	1.93217	1.36901	2.727	0.000179231	1.87965	1.2688	2.7846	0.00164827	0.592566	0.428571	0.745283	345	111	234
C14orf39									0.4551	0	1	345	345	0
C14orf4	0.884929	0.620753	1.26153	0.4992	0.742099	0.512185	1.07522	0.114883	0.490247	0.368421	0.674528	345	228	117
C14orf43	1.44345	1.00937	2.06421	0.0443193	1.76864	1.19164	2.62503	0.00465203	0.526068	0.345865	0.754717	345	98	247
C14orf45	1.43935	0.966203	2.1442	0.0733096	1.35981	0.868677	2.12862	0.178876	0.531494	0.240602	0.853774	345	63	282
C14orf48	1.36574	0.190627	9.78482	0.756374	1.53724	0.207272	11.401	0.674048	0.475812	1	0.00471698	345	2	343
C14orf49	1.50575	1.0709	2.11716	0.0185752	1.23594	0.851158	1.79466	0.265658	0.541956	0.473684	0.65566	345	136	209
C14orf50	0.809136	0.538331	1.21617	0.308365	0.826125	0.54281	1.25731	0.372722	0.49351	0.781955	0.292453	345	92	253
C14orf53	0.817802	0.502871	1.32996	0.417557	0.961301	0.569389	1.62297	0.882576	0.499007	0.864662	0.188679	345	59	286
C14orf64	1.50846	1.02462	2.22078	0.0372324	1.463	0.929794	2.30199	0.0999255	0.537346	0.270677	0.834906	345	71	274
C14orf68	1.22396	0.867731	1.72643	0.249507	1.07873	0.739575	1.57341	0.693954	0.530359	0.428571	0.650943	345	131	214
C14orf70	1.10568	0.644652	1.89641	0.715147	1.15779	0.665212	2.01513	0.604321	0.486629	0.894737	0.122642	345	41	304
C14orf72	1.17475	0.823995	1.67481	0.373426	1.18572	0.810801	1.734	0.379707	0.50532	0.360902	0.716981	345	108	237
C14orf73	0.739116	0.524555	1.04144	0.0840105	0.712719	0.49655	1.023	0.0662596	0.535306	0.443609	0.674528	345	218	127
C14orf79	1.44845	1.02353	2.04977	0.036508	1.35734	0.936141	1.96806	0.106998	0.548659	0.593985	0.518868	345	181	164
C14orf80	0.71062	0.504212	1.00153	0.051027	0.698225	0.48428	1.00669	0.0543212	0.507483	0.571429	0.495283	345	163	182
C14orf86									0.475209	0	1	345	345	0
C14orf93	1.47066	1.03984	2.07998	0.0291955	1.40706	0.961819	2.05842	0.0785089	0.556426	0.406015	0.716981	345	114	231
C15orf17	1.58788	1.11729	2.25669	0.00992646	1.55398	1.06188	2.27414	0.0232671	0.553873	0.62406	0.5	345	189	156
C15orf2	1.16592	0.709213	1.91671	0.545021	1.43888	0.861645	2.40282	0.16429	0.467744	0.87218	0.132075	345	46	299
C15orf21	1.38087	0.914025	2.08615	0.125292	1.43823	0.927748	2.22959	0.104229	0.513176	0.781955	0.278302	345	257	88
C15orf23	0.706511	0.461469	1.08167	0.109887	0.645079	0.400296	1.03955	0.0717583	0.519081	0.210526	0.882075	345	293	52
C15orf24	1.88521	1.14124	3.11417	0.0132909	1.54779	0.872354	2.74621	0.135391	0.498794	0.135338	0.929245	345	33	312
C15orf26	0.762051	0.51122	1.13595	0.182162	0.592716	0.387734	0.906065	0.0157124	0.528213	0.766917	0.330189	345	102	243
C15orf27	1.44859	1.02074	2.05578	0.0379986	1.18593	0.797871	1.76272	0.399067	0.559015	0.616541	0.509434	345	186	159
C15orf28	0.758287	0.524574	1.09613	0.141084	0.649346	0.437252	0.964317	0.0323507	0.520482	0.699248	0.382075	345	122	223
C15orf29	1.06884	0.760597	1.50201	0.701324	1.13639	0.792374	1.62977	0.487062	0.486133	0.503759	0.528302	345	179	166
C15orf32									0.469623	0	1	345	345	0
C15orf33	0.78514	0.547804	1.1253	0.187788	0.90156	0.60863	1.33548	0.605208	0.512165	0.669173	0.40566	345	131	214
C15orf34	0.9845	0.700247	1.38414	0.928393	1.03953	0.732609	1.47503	0.828096	0.521776	0.526316	0.551887	345	181	164
C15orf37	1.04979	0.707701	1.55723	0.809168	0.856857	0.552839	1.32806	0.489588	0.512023	0.75188	0.316038	345	245	100
C15orf38	1.39511	0.978619	1.98884	0.0656953	1.83952	1.24539	2.71708	0.00219381	0.535218	0.360902	0.740566	345	103	242
C15orf39	1.46494	0.994531	2.15785	0.0533332	1.51809	0.994341	2.31772	0.0531531	0.537275	0.729323	0.396226	345	225	120
C15orf40	0.991579	0.626678	1.56896	0.971187	0.988949	0.60604	1.61379	0.964524	0.479217	0.842105	0.183962	345	61	284
C15orf41	1.54633	1.09175	2.19018	0.0141181	1.91304	1.30559	2.80312	0.000874799	0.528125	0.601504	0.5	345	186	159
C15orf42	0.733858	0.517459	1.04075	0.0825838	0.876963	0.591398	1.30042	0.51366	0.5377	0.616541	0.466981	345	151	194
C15orf43									0.514665	0.804511	0.231132	345	345	0
C15orf44	0.72903	0.509316	1.04353	0.0841447	0.863766	0.583905	1.27776	0.463515	0.534473	0.661654	0.419811	345	135	210
C15orf48	1.30038	0.872322	1.93849	0.19726	1.77758	1.15734	2.73021	0.00860447	0.500035	0.240602	0.816038	345	71	274
C15orf5	1.56872	1.11463	2.20781	0.00981185	1.57215	1.07953	2.28956	0.0183268	0.550096	0.481203	0.650943	345	138	207
C15orf50									0.463151	0	1	345	345	0
C15orf51	1.61913	1.1502	2.27923	0.00574463	1.315	0.892276	1.938	0.166379	0.579196	0.548872	0.599057	345	158	187
C15orf52	1.4875	1.05025	2.10679	0.0253509	1.24434	0.858086	1.80445	0.24898	0.535324	0.601504	0.495283	345	187	158
C15orf53	0.805548	0.563216	1.15215	0.2363	1.00864	0.68202	1.49167	0.965637	0.515109	0.661654	0.410377	345	133	212
C15orf54	1.48091	1.04173	2.10524	0.0286866	1.3503	0.922934	1.97555	0.12189	0.559388	0.37594	0.735849	345	106	239
C15orf55	0.647837	0.442325	0.948833	0.0257653	0.818139	0.544566	1.22915	0.33379	0.518336	0.285714	0.820755	345	270	75
C15orf56	1.5493	1.08032	2.22188	0.0173154	1.41336	0.96066	2.07939	0.0790495	0.523957	0.338346	0.773585	345	93	252
C15orf57	0.827295	0.518354	1.32037	0.426698	0.780798	0.477815	1.2759	0.323382	0.526812	0.849624	0.231132	345	70	275
C15orf58	0.692086	0.487764	0.981996	0.0392323	0.833291	0.575287	1.207	0.334682	0.563803	0.62406	0.5	345	157	188
C15orf59	1.58323	1.11375	2.25061	0.0104583	1.73528	1.14463	2.6307	0.00942374	0.561853	0.37594	0.75	345	103	242
C15orf60	1.22341	0.30199	4.9562	0.777567	1.39889	0.335323	5.83585	0.645073	0.449089	0.992481	0.0188679	345	6	339
C15orf61	0.583702	0.390031	0.87354	0.00886431	0.718014	0.460336	1.11993	0.144133	0.538693	0.240602	0.863208	345	285	60
C15orf62	0.446767	0.233958	0.853149	0.0146403	0.305988	0.153946	0.608192	0.000728169	0.507838	0.0827068	0.981132	345	331	14
C15orf63	1.38073	0.94126	2.02538	0.0988819	1.52151	1.00738	2.29803	0.0460533	0.515747	0.270677	0.801887	345	78	267
C16orf11	0.95507	0.662161	1.37755	0.805687	0.898851	0.614548	1.31468	0.582536	0.474926	0.691729	0.320755	345	110	235
C16orf13	0.830974	0.569581	1.21233	0.336642	0.861714	0.582698	1.27433	0.455932	0.523904	0.721805	0.367925	345	116	229
C16orf3	1.32976	0.909316	1.94459	0.141637	1.00405	0.661331	1.52439	0.984846	0.529419	0.278195	0.79717	345	80	265
C16orf42	0.592244	0.390079	0.899183	0.0139415	0.539557	0.344966	0.843916	0.00686022	0.547986	0.796992	0.363208	345	105	240
C16orf45	1.51516	1.06457	2.15648	0.0210325	1.29323	0.875095	1.91116	0.196907	0.549227	0.631579	0.476415	345	195	150
C16orf46	0.687294	0.489039	0.96592	0.0307989	0.686243	0.482496	0.976029	0.0361746	0.545609	0.526316	0.608491	345	193	152
C16orf48	1.5335	0.96064	2.44796	0.0731827	1.16475	0.712615	1.90376	0.542936	0.51064	0.157895	0.929245	345	36	309
C16orf5	1.26326	0.891451	1.79014	0.188872	1.21473	0.832755	1.7719	0.312571	0.547489	0.601504	0.509434	345	184	161
C16orf52	1.73514	1.23461	2.43858	0.0015051	1.34496	0.91749	1.97161	0.128841	0.566304	0.503759	0.641509	345	143	202
C16orf53	0.714517	0.492611	1.03638	0.0764588	0.753648	0.508161	1.11773	0.15958	0.53614	0.706767	0.424528	345	130	215
C16orf54	1.4533	0.993696	2.12547	0.0539351	1.55175	1.02026	2.36012	0.0400021	0.520783	0.278195	0.811321	345	77	268
C16orf55	0.583991	0.388228	0.878466	0.00982322	0.593419	0.380413	0.925695	0.0214311	0.516846	0.233083	0.867925	345	287	58
C16orf57	0.920909	0.618426	1.37134	0.685063	1.02021	0.677325	1.53668	0.923725	0.478224	0.766917	0.254717	345	86	259
C16orf58	1.43309	0.890101	2.30733	0.138646	1.1303	0.686194	1.86182	0.630517	0.534225	0.849624	0.259434	345	270	75
C16orf59	0.569628	0.403733	0.803688	0.00135388	0.552554	0.375561	0.81296	0.00260346	0.569691	0.571429	0.622642	345	190	155
C16orf61	0.722861	0.509498	1.02557	0.0689922	0.702312	0.486097	1.0147	0.0598041	0.567421	0.398496	0.75	345	240	105
C16orf62	1.69893	1.1998	2.40571	0.00282354	2.39398	1.60003	3.58188	2.1734e-05	0.585686	0.398496	0.787736	345	98	247
C16orf63	0.872848	0.616176	1.23644	0.444021	0.976564	0.673577	1.41584	0.900416	0.52816	0.601504	0.485849	345	157	188
C16orf68	1.46679	1.03575	2.0772	0.0309407	1.05219	0.713834	1.55091	0.797194	0.547241	0.601504	0.528302	345	180	165
C16orf7	1.53154	1.03896	2.25766	0.0313171	1.27385	0.83793	1.93654	0.257394	0.580721	0.736842	0.415094	345	222	123
C16orf70	1.35056	0.923847	1.97438	0.120871	1.42574	0.942436	2.15689	0.0931	0.510675	0.278195	0.792453	345	81	264
C16orf71	0.747588	0.525765	1.063	0.105278	0.673213	0.465626	0.973348	0.0354157	0.510658	0.631579	0.45283	345	146	199
C16orf72	1.31604	0.932418	1.85749	0.118293	1.21776	0.826314	1.79466	0.319376	0.514151	0.421053	0.669811	345	126	219
C16orf73	0.892037	0.572779	1.38924	0.613237	0.861155	0.54421	1.36269	0.523227	0.529916	0.827068	0.231132	345	73	272
C16orf74	1.3171	0.90265	1.92185	0.153091	1.07963	0.711478	1.63829	0.71877	0.519081	0.285714	0.79717	345	81	264
C16orf75	0.768401	0.536202	1.10115	0.151265	0.807744	0.545722	1.19557	0.285898	0.520216	0.669173	0.429245	345	136	209
C16orf78	1.04431	0.331942	3.28545	0.940899	1.04117	0.326821	3.31687	0.945596	0.476025	0.984962	0.0283019	345	9	336
C16orf79	0.622832	0.390347	0.993784	0.0470199	0.511273	0.314768	0.830453	0.00671525	0.522237	0.165414	0.910377	345	305	40
C16orf80	0.840759	0.596194	1.18565	0.322666	0.945453	0.645961	1.3838	0.772886	0.539119	0.56391	0.556604	345	177	168
C16orf81	1.53357	1.0253	2.2938	0.0373789	1.53087	1.00839	2.32406	0.0455873	0.521067	0.233083	0.858491	345	61	284
C16orf82	0.844437	0.466316	1.52917	0.576781	0.989636	0.53808	1.82014	0.973268	0.492517	0.917293	0.103774	345	34	311
C16orf86	1.44706	1.02885	2.03526	0.0337192	1.17225	0.800262	1.71715	0.414522	0.541921	0.511278	0.608491	345	151	194
C16orf87	0.944465	0.652816	1.36641	0.761722	0.868268	0.588616	1.28078	0.476335	0.519861	0.699248	0.391509	345	124	221
C16orf88	0.721078	0.512397	1.01475	0.0606569	0.733901	0.508062	1.06013	0.0991919	0.563839	0.548872	0.589623	345	186	159
C16orf89	1.67008	1.1831	2.35751	0.00354684	1.63329	1.10743	2.40887	0.0133357	0.546088	0.571429	0.542453	345	173	172
C16orf90	0.752786	0.523156	1.08321	0.126146	0.764438	0.517973	1.12818	0.17617	0.528798	0.684211	0.410377	345	130	215
C16orf91	0.564549	0.386033	0.825618	0.00319787	0.623721	0.41717	0.932538	0.0214301	0.601575	0.729323	0.45283	345	133	212
C16orf92	0.768534	0.461528	1.27976	0.311593	0.888996	0.525551	1.50378	0.660859	0.520925	0.879699	0.183962	345	56	289
C16orf93	0.598845	0.424928	0.843944	0.00339786	0.651507	0.453025	0.936951	0.0208184	0.533515	0.56391	0.570755	345	180	165
C17orf100	1.64784	1.03297	2.62869	0.0360723	1.58761	0.97164	2.59406	0.0650201	0.527805	0.157895	0.915094	345	39	306
C17orf101	0.788384	0.53065	1.1713	0.23913	0.924488	0.605784	1.41086	0.715827	0.510498	0.255639	0.801887	345	270	75
C17orf102									0.441357	0	1	345	345	0
C17orf103	1.46104	1.03513	2.0622	0.0310588	1.33268	0.909519	1.95272	0.140643	0.535998	0.421053	0.707547	345	118	227
C17orf104	1.3698	0.970066	1.93426	0.0738829	1.13046	0.780842	1.63663	0.515975	0.531068	0.421053	0.679245	345	124	221
C17orf105									0.49961	0.917293	0.0849057	345	345	0
C17orf106	0.827399	0.582386	1.17549	0.290277	0.890536	0.619756	1.27962	0.530776	0.521599	0.390977	0.683962	345	227	118
C17orf107	1.36856	0.948149	1.97539	0.093812	1.13599	0.766715	1.68313	0.524997	0.540715	0.684211	0.415094	345	215	130
C17orf108	2.07687	1.28939	3.3453	0.00265576	1.93479	1.18225	3.16636	0.00863647	0.534544	0.849624	0.292453	345	263	82
C17orf28	0.825497	0.586814	1.16126	0.270752	0.874854	0.61054	1.25359	0.46632	0.521031	0.541353	0.528302	345	174	171
C17orf37	0.783192	0.554802	1.1056	0.164755	0.71649	0.489624	1.04847	0.0861094	0.543978	0.586466	0.518868	345	166	179
C17orf39	1.16582	0.772078	1.76035	0.465575	1.50063	0.953853	2.36083	0.0791555	0.512058	0.218045	0.825472	345	66	279
C17orf42	0.655273	0.465802	0.921815	0.0152039	0.619943	0.427923	0.898126	0.0114691	0.564335	0.481203	0.712264	345	221	124
C17orf44	0.799732	0.567824	1.12635	0.200899	0.782041	0.5443	1.12362	0.183654	0.516421	0.451128	0.641509	345	210	135
C17orf46	1.0184	0.705571	1.46994	0.922414	0.821944	0.552637	1.22249	0.332984	0.508139	0.323308	0.726415	345	101	244
C17orf47	0.783679	0.50337	1.22008	0.28048	0.810746	0.513157	1.28091	0.368627	0.516988	0.827068	0.240566	345	75	270
C17orf48	1.37269	0.936209	2.01266	0.104724	1.18533	0.789722	1.77912	0.41188	0.52965	0.729323	0.349057	345	235	110
C17orf49	1.22804	0.869693	1.73404	0.243258	1.3268	0.926335	1.9004	0.122941	0.51447	0.421053	0.641509	345	132	213
C17orf50	0.72673	0.493815	1.0695	0.105419	0.859953	0.556766	1.32824	0.496365	0.536211	0.270677	0.834906	345	275	70
C17orf51	0.971891	0.689303	1.37033	0.870794	0.856627	0.587739	1.24853	0.420742	0.539296	0.488722	0.589623	345	152	193
C17orf53	0.636287	0.446435	0.906877	0.0123977	0.625195	0.410065	0.953187	0.0290525	0.560079	0.37594	0.75	345	243	102
C17orf54	0.449861	0.062761	3.22453	0.426667	0.516096	0.0696244	3.8256	0.517506	0.471095	1	0.0141509	345	4	341
C17orf55	1.80606	1.2457	2.61849	0.00181336	1.51186	0.993649	2.30032	0.0535809	0.584338	0.699248	0.471698	345	205	140
C17orf56	1.26945	0.89452	1.80153	0.181599	1.06298	0.728633	1.55076	0.751252	0.538871	0.616541	0.504717	345	187	158
C17orf57	1.01186	0.718216	1.42555	0.946271	0.870009	0.602347	1.25661	0.457896	0.488793	0.56391	0.495283	345	164	181
C17orf58	0.742875	0.527859	1.04547	0.0882167	0.861588	0.583003	1.27329	0.454717	0.568485	0.556391	0.589623	345	185	160
C17orf59	1.09434	0.758796	1.57827	0.629414	1.24824	0.833788	1.86872	0.281465	0.488403	0.684211	0.363208	345	226	119
C17orf60	1.47108	1.04144	2.07798	0.0284984	1.32921	0.909611	1.94235	0.141441	0.54357	0.43609	0.665094	345	129	216
C17orf61	1.55196	1.10302	2.18362	0.0116444	1.4704	1.03476	2.08944	0.0315095	0.5449	0.533835	0.617925	345	152	193
[truncated: 18,479 more rows]

## Sheet: Supplementary Table 2
ACRG dataset
	Univariate				Multivariate
genes	HR	Lower_CI	Upper_CI	p	HR	Lower_CI	Upper_CI	p	AUC	sensitivity	specificity	Number	n_high	n_low
A1BG	1.48739	1.07814	2.05198	0.0155954	0.956713	0.674737	1.35653	0.803836	0.580151	0.562914	0.582192	297	146	151
A1BG-AS1	1.60079	1.15793	2.21302	0.00440854	1.34731	0.963476	1.88406	0.0814238	0.571759	0.417219	0.753425	297	99	198
A1CF	0.670727	0.449628	1.00055	0.0503152	0.713465	0.455317	1.11797	0.140664	0.523814	0.807947	0.315068	297	76	221
A2M	1.94771	1.41436	2.68217	4.43592e-05	1.06446	0.701167	1.61598	0.769323	0.647691	0.490066	0.746575	297	111	186
A2M-AS1	2.23108	1.57669	3.15708	5.88122e-06	1.50809	1.02178	2.22584	0.0385966	0.665926	0.695364	0.582192	297	166	131
A2ML1	1.25053	0.906967	1.72425	0.172521	1.18611	0.846685	1.66161	0.32103	0.521138	0.443709	0.650685	297	118	179
A2MP1	0.566698	0.405377	0.792216	0.000891611	0.601494	0.425694	0.849894	0.00395047	0.582872	0.357616	0.815068	297	217	80
A4GALT	1.65382	1.19212	2.29434	0.0025945	1.10995	0.777884	1.58377	0.565208	0.609544	0.609272	0.59589	297	151	146
A4GNT	1.38675	0.992712	1.9372	0.0552281	1.32238	0.929981	1.88034	0.119757	0.547446	0.649007	0.479452	297	174	123
AA06	0.734796	0.525953	1.02657	0.0708746	0.810978	0.566652	1.16065	0.252021	0.53631	0.357616	0.739726	297	206	91
AAAS	0.77377	0.55818	1.07263	0.123754	0.855454	0.602438	1.21473	0.382848	0.515967	0.403974	0.678082	297	190	107
AACS	0.746316	0.527551	1.0558	0.0982919	0.857463	0.591991	1.24198	0.415921	0.520185	0.701987	0.40411	297	105	192
AACSP1	0.744703	0.496655	1.11663	0.15381	0.645855	0.421738	0.989071	0.0443782	0.514923	0.198675	0.869863	297	249	48
AADAC	1.17169	0.81127	1.69222	0.398228	1.15103	0.766768	1.72786	0.497367	0.498685	0.748344	0.308219	297	214	83
AADACL2	0.577919	0.394244	0.847166	0.00495538	0.588511	0.39646	0.873593	0.00852618	0.524721	0.231788	0.89726	297	248	49
AADACP1	1.05869	0.758902	1.4769	0.737055	0.958616	0.671073	1.36937	0.816312	0.483625	0.642384	0.410959	297	183	114
AADAT	1.55879	1.06337	2.28503	0.0229155	1.57639	1.06009	2.34415	0.0245632	0.526717	0.774834	0.335616	297	214	83
AAED1	1.71541	1.23842	2.37613	0.00116908	1.5255	1.08608	2.14272	0.0148372	0.568085	0.596026	0.575342	297	152	145
AAGAB	0.645305	0.464567	0.896358	0.00898691	0.902137	0.615678	1.32188	0.597253	0.599292	0.622517	0.541096	297	137	160
AAK1	1.29579	0.924489	1.81622	0.132532	0.95419	0.664518	1.37013	0.799476	0.545949	0.662252	0.452055	297	180	117
AAMDC	1.66772	1.21041	2.29779	0.0017613	1.5335	1.08633	2.16474	0.0150686	0.586047	0.470199	0.719178	297	112	185
AAMP	0.502594	0.364162	0.69365	2.84932e-05	0.647094	0.441477	0.948477	0.0256735	0.618071	0.456954	0.760274	297	194	103
AANAT	0.485769	0.351974	0.670424	1.12097e-05	0.468661	0.32971	0.66617	2.40075e-05	0.606074	0.562914	0.69863	297	169	128
AAR2	1.55885	1.13206	2.14653	0.00653011	1.6426	1.12975	2.38826	0.00935447	0.551982	0.509934	0.630137	297	131	166
AARS	0.820413	0.595996	1.12933	0.22474	0.814679	0.5729	1.1585	0.253882	0.514424	0.490066	0.582192	297	163	134
AARS2	0.514839	0.368682	0.718937	9.74672e-05	0.647408	0.440999	0.950428	0.0264519	0.564456	0.364238	0.835616	297	219	78
AARSD1 /// PTGES3L /// PTGES3L-AARSD1	0.807656	0.576381	1.13173	0.214591	1.07895	0.744923	1.56276	0.687668	0.510342	0.675497	0.410959	297	111	186
AASDH	1.35331	0.963996	1.89986	0.0804462	1.3023	0.920702	1.84206	0.135444	0.538057	0.668874	0.445205	297	182	115
AASDHPPT	0.703115	0.503232	0.982391	0.0390108	0.775677	0.539287	1.11568	0.170781	0.564683	0.655629	0.5	297	126	171
AASS	1.79718	1.3054	2.47423	0.000325891	1.74437	1.20853	2.51778	0.0029632	0.573029	0.490066	0.691781	297	119	178
AATF	0.700566	0.505509	0.970888	0.0325645	0.726439	0.513429	1.02782	0.0710776	0.537104	0.403974	0.726027	297	197	100
AATK	0.810201	0.519475	1.26363	0.353341	0.980982	0.61483	1.56519	0.935799	0.490747	0.854305	0.191781	297	51	246
AB074162 /// MIR181A2HG	1.5675	1.10573	2.22212	0.0115888	1.10406	0.76486	1.5937	0.597074	0.577429	0.701987	0.438356	297	188	109
AB488780	1.66503	1.18581	2.33792	0.003239	1.48575	1.03651	2.12971	0.0311501	0.570262	0.668874	0.493151	297	175	122
ABAT	1.54177	1.04337	2.27822	0.0297735	1.22882	0.816968	1.84829	0.322499	0.554976	0.788079	0.321918	297	218	79
ABCA1	1.51286	1.09727	2.08587	0.0115242	1.00981	0.687281	1.48369	0.960347	0.578245	0.549669	0.582192	297	144	153
ABCA11P	1.36564	0.984656	1.89404	0.0618583	1.5633	1.10042	2.2209	0.0126274	0.508006	0.390728	0.69863	297	103	194
ABCA12	0.473118	0.321364	0.696532	0.000149081	0.626735	0.420601	0.933893	0.0216722	0.621882	0.788079	0.445205	297	98	199
ABCA13	1.40881	1.02359	1.93901	0.035465	1.22917	0.881156	1.71463	0.224375	0.545904	0.476821	0.650685	297	123	174
ABCA17P	1.45224	1.05459	1.99984	0.0222819	1.38373	0.979097	1.95559	0.0657284	0.540552	0.529801	0.60274	297	138	159
ABCA2	0.752317	0.545568	1.03742	0.08258	0.898207	0.642111	1.25644	0.530728	0.539418	0.562914	0.554795	297	148	149
ABCA3	1.18905	0.856428	1.65087	0.301019	0.921283	0.648895	1.30801	0.646612	0.529892	0.615894	0.465753	297	171	126
ABCA4	0.682207	0.469067	0.992195	0.0453963	0.871709	0.587935	1.29245	0.494427	0.560646	0.768212	0.342466	297	86	211
ABCA5	1.27824	0.917277	1.78125	0.147069	1.18607	0.834068	1.68663	0.342142	0.522045	0.635762	0.465753	297	174	123
ABCA6	2.3326	1.6017	3.39705	1.0056e-05	1.68148	1.01439	2.78729	0.0438667	0.564864	0.238411	0.931507	297	46	251
ABCA7	1.29158	0.932994	1.78797	0.123079	1.37125	0.972079	1.93434	0.0720757	0.508754	0.596026	0.493151	297	164	133
ABCA8	1.97091	1.43145	2.71367	3.20753e-05	1.37469	0.931204	2.02938	0.109309	0.625873	0.490066	0.767123	297	108	189
ABCA9	1.97951	1.43622	2.7283	3.02565e-05	1.39196	0.942027	2.05679	0.0968815	0.585186	0.463576	0.760274	297	105	192
ABCB1	1.29227	0.938606	1.77918	0.116043	0.800751	0.552431	1.16069	0.240719	0.530028	0.470199	0.623288	297	126	171
ABCB1 /// ABCB4	1.5306	1.11211	2.10657	0.0090018	0.946921	0.637858	1.40573	0.786732	0.556201	0.503311	0.643836	297	128	169
ABCB10	0.665984	0.48303	0.918234	0.0131197	0.934187	0.65557	1.33122	0.706363	0.568539	0.456954	0.69863	297	185	112
ABCB11	1.05042	0.763033	1.44605	0.762945	0.988213	0.706386	1.38248	0.944814	0.480314	0.529801	0.513699	297	151	146
ABCB4	1.53628	1.11536	2.11604	0.0085816	1.05979	0.74239	1.51289	0.749155	0.573483	0.536424	0.616438	297	137	160
ABCB5	1.51833	1.09416	2.10695	0.0124801	1.45259	1.03171	2.04515	0.0324506	0.528441	0.390728	0.732877	297	98	199
ABCB6	0.673324	0.487724	0.929552	0.0162181	0.73641	0.49529	1.09491	0.13056	0.543908	0.437086	0.705479	297	189	108
ABCB7	0.894661	0.650287	1.23087	0.494084	1.07716	0.745205	1.55697	0.69255	0.490066	0.503311	0.547945	297	156	141
ABCB8	0.60973	0.442721	0.839741	0.00244969	0.774634	0.545294	1.10043	0.153963	0.605325	0.529801	0.657534	297	168	129
ABCB8 /// ASIC3	0.807033	0.583475	1.11625	0.195163	1.22113	0.846193	1.76219	0.285731	0.515558	0.417219	0.671233	297	187	110
ABCB9	1.41857	1.03029	1.95318	0.032126	1.44977	1.03828	2.02433	0.0292175	0.524721	0.476821	0.657534	297	122	175
ABCC1	1.39411	0.886869	2.19145	0.149945	1.16254	0.728112	1.85616	0.528137	0.508255	0.854305	0.212329	297	244	53
ABCC10	0.732043	0.526696	1.01745	0.0633154	0.922979	0.648365	1.31391	0.656454	0.539145	0.384106	0.732877	297	201	96
ABCC11	1.08336	0.787296	1.49076	0.623	1.21099	0.871286	1.68314	0.254418	0.480677	0.509934	0.520548	297	147	150
ABCC12	0.625784	0.454255	0.862084	0.00413163	0.835925	0.598622	1.1673	0.292819	0.579924	0.543046	0.623288	297	161	136
ABCC13	0.547265	0.376156	0.796208	0.00162546	0.594654	0.398962	0.886332	0.0106948	0.576295	0.768212	0.40411	297	95	202
ABCC2	0.72363	0.522712	1.00177	0.0512621	0.884273	0.624958	1.25119	0.487356	0.525356	0.410596	0.69863	297	192	105
ABCC3	0.55504	0.375339	0.820777	0.00318335	0.756565	0.48453	1.18133	0.219821	0.521682	0.218543	0.89726	297	250	47
ABCC4	1.55855	1.13123	2.14728	0.00664508	1.2426	0.863873	1.78736	0.241582	0.547537	0.536424	0.589041	297	141	156
ABCC5	1.8749	1.28401	2.7377	0.00113695	1.58389	1.03892	2.41473	0.0325636	0.594031	0.768212	0.431507	297	199	98
ABCC6 /// ABCC6P1 /// ABCC6P2 /// LOC101930322	1.89287	1.09182	3.28165	0.0230343	1.58303	0.882253	2.84045	0.123568	0.510387	0.907285	0.205479	297	253	44
ABCC6 /// LOC101930322	1.23514	0.857757	1.77854	0.256297	1.18736	0.798056	1.76656	0.396902	0.515377	0.741722	0.335616	297	209	88
ABCC6P1	0.765486	0.510552	1.14772	0.195925	0.905131	0.588788	1.39144	0.649602	0.53055	0.81457	0.267123	297	68	229
ABCC8	0.629703	0.457387	0.866936	0.00457816	0.931512	0.655173	1.3244	0.692741	0.585322	0.496689	0.671233	297	175	122
ABCC9	1.95926	1.38723	2.76717	0.000134512	1.39507	0.880728	2.20979	0.155969	0.582736	0.311258	0.883562	297	64	233
ABCD1	1.40579	0.848603	2.32883	0.185992	1.29086	0.760539	2.19098	0.344217	0.489068	0.887417	0.171233	297	255	42
ABCD1P2 /// ABCD1P2	0.394776	0.207765	0.750117	0.00454152	0.510872	0.264848	0.985436	0.0450985	0.564978	0.940397	0.184932	297	37	260
ABCD2	0.811377	0.583166	1.12889	0.214805	0.714974	0.502765	1.01675	0.0618328	0.508981	0.635762	0.452055	297	122	175
ABCD3	0.566738	0.402162	0.798663	0.00117678	0.739841	0.50891	1.07556	0.114475	0.606369	0.688742	0.520548	297	124	173
ABCD4	0.548853	0.377093	0.798847	0.00173193	0.764483	0.51404	1.13694	0.18478	0.599156	0.768212	0.417808	297	97	200
ABCE1	0.581643	0.422334	0.801045	0.000905224	0.852194	0.59042	1.23003	0.392985	0.604509	0.529801	0.684932	297	172	125
ABCF1	0.714085	0.503707	1.01233	0.0586058	0.613096	0.411632	0.913162	0.0160896	0.50195	0.304636	0.80137	297	223	74
ABCF2	0.733157	0.532777	1.0089	0.0567065	0.971208	0.683965	1.37908	0.870282	0.543863	0.503311	0.636986	297	169	128
ABCF3	0.671328	0.476422	0.945971	0.0227629	0.778898	0.535155	1.13366	0.191937	0.534655	0.324503	0.808219	297	221	76
ABCG1	1.34957	0.979052	1.8603	0.067148	1.05943	0.740893	1.51491	0.751709	0.568811	0.549669	0.575342	297	145	152
ABCG2	1.62363	1.02379	2.57493	0.0394093	1.15702	0.709137	1.88779	0.559276	0.530028	0.860927	0.239726	297	241	56
ABCG4	1.09607	0.787733	1.52509	0.586253	0.896625	0.634315	1.26741	0.536608	0.49619	0.370861	0.684932	297	102	195
ABCG5	0.785836	0.558894	1.10493	0.165717	0.851022	0.595249	1.2167	0.376419	0.529257	0.682119	0.40411	297	108	189
ABCG8	0.719418	0.514129	1.00668	0.0547144	0.675608	0.463078	0.985679	0.0418698	0.540801	0.350993	0.767123	297	211	86
ABHD1	0.660921	0.461372	0.946779	0.023934	0.862279	0.5832	1.27491	0.457682	0.512338	0.278146	0.835616	297	232	65
ABHD10	0.537094	0.389548	0.740524	0.000148795	0.792314	0.543865	1.15426	0.225255	0.615078	0.549669	0.671233	297	167	130
ABHD11	0.573755	0.406349	0.810127	0.00159826	0.782865	0.527683	1.16145	0.223868	0.630863	0.695364	0.513699	297	122	175
ABHD12	0.698052	0.50657	0.961912	0.0279962	0.629887	0.435549	0.910939	0.0140684	0.532886	0.463576	0.650685	297	177	120
ABHD12B /// MIR4454	0.554292	0.400696	0.766764	0.000365124	0.586503	0.416058	0.826773	0.00232038	0.554931	0.430464	0.760274	297	198	99
ABHD13	0.59914	0.434194	0.826748	0.00182077	0.685603	0.486534	0.966121	0.0310125	0.591128	0.569536	0.60274	297	154	143
ABHD14A-ACY1 /// ACY1	0.537295	0.374069	0.771746	0.000772725	0.775486	0.48812	1.23203	0.281695	0.569945	0.271523	0.869863	297	238	59
ABHD14A /// ACY1	1.48102	1.01825	2.15411	0.0399184	1.51334	1.00948	2.26867	0.044893	0.520684	0.238411	0.849315	297	58	239
ABHD14B	0.742875	0.537439	1.02684	0.071923	0.93103	0.65444	1.32452	0.691115	0.524585	0.423841	0.657534	297	184	113
ABHD15	0.781996	0.557126	1.09763	0.155175	0.983188	0.687023	1.40703	0.926133	0.533113	0.675497	0.438356	297	114	183
ABHD16A	0.628463	0.455318	0.86745	0.0047319	0.741421	0.521817	1.05344	0.0950294	0.564456	0.443709	0.705479	297	188	109
ABHD16B	0.663638	0.482133	0.913474	0.0118997	0.819992	0.581872	1.15556	0.256838	0.551937	0.490066	0.650685	297	173	124
ABHD17A	1.4577	1.0282	2.0666	0.0343338	1.31803	0.881603	1.9705	0.178363	0.548671	0.298013	0.821918	297	71	226
ABHD17B	0.585613	0.417819	0.820793	0.00189354	0.796664	0.542538	1.16982	0.246154	0.593985	0.344371	0.828767	297	221	76
ABHD17C	0.538529	0.385907	0.75151	0.000272504	0.813238	0.562565	1.17561	0.271547	0.621564	0.649007	0.554795	297	135	162
ABHD2	0.687635	0.496801	0.951775	0.0239471	0.964138	0.67069	1.38598	0.843651	0.548263	0.596026	0.534247	297	140	157
ABHD3	0.500692	0.363454	0.68975	2.311e-05	0.607781	0.427526	0.864035	0.00553449	0.617708	0.529801	0.705479	297	175	122
ABHD4	1.84186	1.32809	2.55436	0.000251711	1.50851	1.03439	2.19992	0.0327097	0.588497	0.397351	0.787671	297	91	206
ABHD5	0.567178	0.327147	0.983322	0.043397	0.738849	0.411627	1.3262	0.310552	0.529575	0.913907	0.184932	297	41	256
ABHD6	0.8224	0.58482	1.1565	0.260974	1.19807	0.817863	1.75502	0.353539	0.502994	0.331126	0.732877	297	209	88
ABHD8	1.37386	0.959624	1.96692	0.0827662	1.20004	0.820988	1.7541	0.34643	0.537943	0.271523	0.821918	297	67	230
ABI1	0.549792	0.394505	0.766203	0.000411572	0.606246	0.425656	0.863455	0.00554386	0.613717	0.642384	0.568493	297	138	159
ABI2	1.88818	1.36651	2.60899	0.00011681	1.55642	1.09391	2.21448	0.0139378	0.603647	0.576159	0.630137	297	141	156
ABI2 /// RP11-363J17.1	0.711585	0.51567	0.981931	0.0383642	0.797138	0.570836	1.11315	0.183265	0.530164	0.569536	0.541096	297	145	152
ABI3	1.2281	0.887723	1.69899	0.214687	0.855728	0.599681	1.2211	0.390425	0.512247	0.410596	0.657534	297	112	185
ABI3BP	1.4719	1.06796	2.02862	0.0181927	0.953859	0.647035	1.40618	0.811449	0.570806	0.549669	0.60274	297	141	156
ABL1	1.61123	1.16971	2.2194	0.0035073	1.32085	0.922138	1.89194	0.129059	0.590493	0.463576	0.712329	297	112	185
ABL2	1.87505	1.32784	2.64778	0.000356404	1.54706	1.06579	2.24567	0.0217284	0.601152	0.688742	0.520548	297	174	123
ABLIM1	0.755951	0.519625	1.09976	0.143524	0.854081	0.576398	1.26554	0.431767	0.512247	0.768212	0.315068	297	82	215
ABLIM2	0.635279	0.461203	0.875059	0.00548906	0.868105	0.596248	1.26391	0.460534	0.576204	0.470199	0.684932	297	181	116
ABLIM3	1.58507	1.14486	2.19454	0.00552102	1.31593	0.916636	1.88916	0.136712	0.563186	0.596026	0.554795	297	155	142
ABO	1.18322	0.836601	1.67346	0.34148	1.21709	0.843694	1.75575	0.293326	0.512292	0.695364	0.369863	297	197	100
abParts /// IGKC /// IGKV4-1 /// IGKV4-1	0.557054	0.404411	0.767311	0.000342214	0.411081	0.286955	0.588901	1.25341e-06	0.599428	0.490066	0.712329	297	182	115
ABR	0.568791	0.412726	0.783868	0.000564606	0.592427	0.416481	0.842705	0.00359321	0.605915	0.470199	0.726027	297	187	110
ABRA	1.35762	0.976831	1.88685	0.0686995	1.32396	0.926861	1.89119	0.122954	0.530164	0.622517	0.486301	297	169	128
ABRACL	0.625359	0.453853	0.861676	0.00410158	0.776365	0.53714	1.12213	0.178027	0.601107	0.463576	0.719178	297	187	110
ABT1	0.607791	0.436115	0.847046	0.00328032	0.746477	0.514265	1.08354	0.124063	0.594439	0.642384	0.541096	297	134	163
ABTB1	0.588725	0.423585	0.818247	0.00160936	0.64955	0.458868	0.919471	0.0149549	0.565	0.390728	0.753425	297	203	94
ABTB2	0.913047	0.661456	1.26033	0.580186	1.09555	0.772605	1.55349	0.608557	0.51066	0.437086	0.623288	297	177	120
AC000111.3	1.20145	0.872179	1.65502	0.261406	1.17225	0.843203	1.62969	0.344453	0.50127	0.456954	0.609589	297	126	171
AC002059.10	0.611694	0.430502	0.869146	0.00609816	0.653406	0.45202	0.944516	0.0235991	0.526717	0.298013	0.828767	297	228	69
AC002064.5	0.72951	0.491378	1.08305	0.117754	0.771666	0.512569	1.16173	0.214319	0.534768	0.801325	0.280822	297	72	225
AC002310.12 /// AK056973	0.797043	0.55523	1.14417	0.218764	1.0277	0.701894	1.50473	0.888318	0.517849	0.741722	0.328767	297	88	209
AC002310.7 /// ZNF785	0.626436	0.434755	0.902627	0.012084	0.471196	0.319792	0.694281	0.000141793	0.54604	0.748344	0.363014	297	92	205
AC003973.4	0.814748	0.586846	1.13116	0.221025	0.926665	0.658755	1.30353	0.661782	0.505352	0.622517	0.458904	297	125	172
AC003986.5 /// BC043576	0.599775	0.432401	0.831937	0.00219768	0.839055	0.592448	1.18831	0.32302	0.590334	0.615894	0.589041	297	145	152
AC003989.4	0.499205	0.35713	0.697801	4.7894e-05	0.762275	0.512867	1.13297	0.179429	0.606822	0.655629	0.582192	297	138	159
AC004158.3 /// AK055364	0.730694	0.510261	1.04635	0.0867787	0.699561	0.479819	1.01994	0.0632629	0.51769	0.278146	0.794521	297	226	71
AC004490.1 /// AX746733	1.1695	0.842359	1.6237	0.349649	1.23574	0.8753	1.74459	0.228979	0.518983	0.384106	0.691781	297	103	194
AC004538.3 /// BC040327	0.823046	0.5977	1.13335	0.232842	0.683434	0.483399	0.966246	0.0312163	0.49467	0.523179	0.541096	297	152	145
AC004692.5	0.555014	0.393799	0.782228	0.000771562	0.581041	0.403567	0.836562	0.0035049	0.602241	0.688742	0.520548	297	124	173
AC004941.5	0.57189	0.414031	0.789936	0.000696898	0.862032	0.603323	1.23168	0.41482	0.598385	0.437086	0.780822	297	200	97
AC004951.6 /// AX747182	2.0873	1.44433	3.01652	8.97302e-05	1.8635	1.25486	2.76735	0.00203423	0.611086	0.748344	0.486301	297	188	109
AC005162.4	0.692012	0.494499	0.968415	0.0317815	0.694158	0.488209	0.986986	0.0420615	0.53309	0.350993	0.753425	297	209	88
AC005224.2	0.693645	0.503769	0.955088	0.0249903	0.957155	0.67975	1.34777	0.801983	0.549555	0.483444	0.643836	297	174	123
AC005256.1	1.64007	1.13157	2.37709	0.00898278	1.36101	0.920802	2.01167	0.122083	0.542502	0.245033	0.883562	297	54	243
AC005306.3	1.41962	0.972231	2.0729	0.069654	1.19159	0.802218	1.76995	0.385223	0.538148	0.231788	0.849315	297	57	240
AC005498.3	1.83641	1.13486	2.97166	0.0133187	1.33431	0.805805	2.20943	0.262349	0.575229	0.874172	0.273973	297	238	59
AC005523.2	0.571874	0.410321	0.797036	0.000969325	0.695135	0.486081	0.994098	0.0463275	0.579697	0.642384	0.547945	297	135	162
AC005523.3	0.778769	0.565646	1.07219	0.125352	0.804181	0.575405	1.12392	0.201961	0.501202	0.536424	0.534247	297	149	148
AC005537.2	0.761159	0.552962	1.04775	0.0941506	0.832785	0.59288	1.16977	0.291209	0.537966	0.483444	0.636986	297	172	125
AC005592.3	1.33114	0.94493	1.87521	0.101842	1.32985	0.921358	1.91946	0.12788	0.514742	0.317881	0.780822	297	80	217
AC005606.14	0.639505	0.462154	0.884915	0.00698081	0.748754	0.53067	1.05646	0.0995031	0.525424	0.596026	0.547945	297	142	155
AC005754.7 /// BC016751	0.542387	0.300519	0.978917	0.0422861	0.513661	0.272122	0.969595	0.0398577	0.515513	0.927152	0.171233	297	37	260
AC005785.2	0.456959	0.31409	0.664814	4.23639e-05	0.545823	0.369977	0.805246	0.00227519	0.616869	0.768212	0.479452	297	106	191
AC005838.2	1.33931	0.96351	1.86167	0.0820818	1.36462	0.950971	1.9582	0.0915765	0.497981	0.622517	0.479452	297	170	127
AC006026.13	1.49622	1.05294	2.12613	0.0245938	2.04317	1.40365	2.97406	0.000191356	0.553003	0.708609	0.417808	297	192	105
AC006129.2	1.344	0.971725	1.85889	0.0739963	1.16155	0.825079	1.63525	0.390803	0.532999	0.589404	0.527397	297	158	139
AC006538.1	0.750876	0.545522	1.03353	0.0788088	0.786847	0.564301	1.09716	0.157566	0.494126	0.523179	0.568493	297	156	141
AC007228.11 /// BX647249	0.751329	0.540564	1.04427	0.0887416	0.744911	0.525533	1.05587	0.0980172	0.553116	0.629139	0.486301	297	128	169
AC007255.8 /// BC038570	1.11476	0.810006	1.53417	0.504931	1.31148	0.935174	1.83922	0.116061	0.488932	0.483444	0.575342	297	135	162
AC007292.3	1.27933	0.929428	1.76097	0.130778	1.22155	0.878837	1.69792	0.233578	0.532977	0.523179	0.568493	297	142	155
AC007349.5	0.74878	0.537287	1.04352	0.087564	0.732814	0.516815	1.03909	0.0810283	0.532115	0.642384	0.452055	297	121	176
AC007362.3	0.680863	0.4911	0.943951	0.0211109	0.873134	0.611952	1.24579	0.454403	0.583961	0.609272	0.534247	297	138	159
AC007364.1 /// FLJ32955	1.10585	0.803537	1.52191	0.536886	1.18344	0.843063	1.66123	0.330372	0.494307	0.516556	0.527397	297	147	150
AC007365.3	0.722861	0.521098	1.00274	0.0519494	0.683007	0.481019	0.969814	0.0330633	0.542661	0.615894	0.513699	297	134	163
AC007389.3	1.25066	0.788518	1.98366	0.341913	1.30081	0.807073	2.0966	0.280206	0.491427	0.860927	0.178082	297	250	47
AC007401.2	1.3372	0.95842	1.86568	0.0872593	1.13271	0.802264	1.59925	0.478907	0.548671	0.642384	0.472603	297	174	123
AC007557.2 /// BC031974	0.816607	0.568776	1.17243	0.272244	0.890558	0.609735	1.30072	0.548716	0.508641	0.271523	0.787671	297	226	71
AC007680.2	1.22688	0.87397	1.72231	0.237381	1.21914	0.850875	1.74678	0.280207	0.502858	0.331126	0.726027	297	90	207
AC007787.2	0.493728	0.35553	0.685644	2.5252e-05	0.588814	0.413498	0.838462	0.00331473	0.621246	0.397351	0.815068	297	211	86
AC007967.3 /// RBMY2TP /// RBMY2TP	1.42762	0.908274	2.24392	0.122836	1.45748	0.910253	2.33369	0.116775	0.511068	0.145695	0.910959	297	35	262
AC008088.4	0.689422	0.491607	0.966835	0.0311277	0.836957	0.588971	1.18936	0.320846	0.54545	0.668874	0.458904	297	118	179
AC008746.12	1.73848	1.19923	2.52021	0.00351264	1.69045	1.14999	2.48493	0.00756375	0.552821	0.245033	0.890411	297	53	244
AC008753.4	0.707331	0.502929	0.994806	0.0466032	0.883678	0.621289	1.25688	0.491463	0.545632	0.682119	0.431507	297	112	185
AC009120.6	1.23821	0.899582	1.70432	0.189935	1.21019	0.863457	1.69617	0.268026	0.505693	0.523179	0.568493	297	142	155
AC009133.15	0.663652	0.48162	0.914484	0.0121943	0.70483	0.500197	0.993181	0.045601	0.55552	0.549669	0.59589	297	156	141
AC009237.8 /// AK055967	1.43743	1.03423	1.99783	0.0307479	1.43403	0.977763	2.1032	0.0650554	0.554205	0.622517	0.506849	297	166	131
AC009502.4	0.480036	0.293146	0.786073	0.00353935	0.553904	0.326621	0.939345	0.0283684	0.521319	0.125828	0.958904	297	273	24
AC009947.3 /// RBMY2AP /// RBMY2AP /// RBMY2BP /// RBMY2BP /// RBMY2DP /// RBMY2DP	0.733407	0.502215	1.07103	0.108536	0.749878	0.500188	1.12421	0.163542	0.522771	0.238411	0.828767	297	237	60
AC010095.5 /// RP13-1039J1.3	0.523418	0.358465	0.764278	0.000802842	0.596849	0.399518	0.891647	0.0117374	0.592466	0.774834	0.417808	297	96	201
AC010145.3 /// MYCNUN	0.638537	0.462239	0.882076	0.00650587	0.705868	0.492362	1.01196	0.0580561	0.564093	0.437086	0.712329	297	190	107
AC010145.4	0.729171	0.524008	1.01466	0.0609821	0.889751	0.629766	1.25707	0.507662	0.551052	0.635762	0.486301	297	127	170
AC010524.4	0.790906	0.574239	1.08932	0.15096	0.865595	0.616785	1.21478	0.403853	0.503901	0.543046	0.513699	297	145	152
AC010980.2 /// LOC440934 /// LOC440934	0.894357	0.644233	1.24159	0.504725	0.872239	0.610594	1.246	0.452513	0.494307	0.622517	0.424658	297	120	177
AC011997.1 /// BC021693	0.704421	0.490636	1.01136	0.0575951	0.651384	0.445526	0.95236	0.0269782	0.534201	0.741722	0.369863	297	94	203
AC012065.7	1.7377	1.19475	2.5274	0.00384161	1.39429	0.935782	2.07746	0.102315	0.612855	0.761589	0.431507	297	198	99
AC012360.6	0.581983	0.420545	0.805392	0.0010923	0.622593	0.442887	0.875217	0.00639153	0.547537	0.417219	0.739726	297	197	100
AC012499.1	0.829047	0.602356	1.14105	0.250004	0.968576	0.684112	1.37133	0.857174	0.5132	0.490066	0.561644	297	160	137
AC012531.25	0.837508	0.590707	1.18742	0.319481	0.742143	0.513908	1.07174	0.111733	0.50948	0.708609	0.356164	297	97	200
AC013463.2	0.571081	0.404419	0.806423	0.00146289	0.664982	0.45994	0.961431	0.0300771	0.565318	0.317881	0.842466	297	227	70
AC013733.4	1.13125	0.822188	1.55649	0.448781	1.05068	0.747555	1.47671	0.775918	0.483217	0.496689	0.554795	297	140	157
AC016831.7	0.740617	0.537429	1.02063	0.0664778	0.900388	0.640196	1.26633	0.546503	0.558106	0.463576	0.657534	297	178	119
AC016999.2	0.680378	0.490575	0.943618	0.0210141	0.595924	0.415969	0.85373	0.00477061	0.547265	0.615894	0.520548	297	135	162
AC017002.2	1.44832	0.970668	2.16101	0.0696542	1.22456	0.807724	1.8565	0.339994	0.513177	0.198675	0.863014	297	50	247
AC017104.6	0.657342	0.476069	0.907638	0.0108136	0.708604	0.50521	0.993883	0.045987	0.557153	0.437086	0.712329	297	190	107
AC018462.2 /// BC071802	1.91121	1.38762	2.63238	7.3254e-05	1.36489	0.964015	1.93245	0.0795353	0.623537	0.529801	0.705479	297	123	174
AC018755.16	0.593913	0.41783	0.844202	0.00368532	0.669936	0.460158	0.975349	0.0365992	0.53284	0.298013	0.835616	297	229	68
AC018755.17	1.18027	0.853301	1.63253	0.316616	1.20489	0.85433	1.69931	0.288006	0.487413	0.410596	0.636986	297	115	182
AC018766.6	0.732235	0.52166	1.02781	0.0716403	0.814082	0.568131	1.16651	0.262382	0.528509	0.337748	0.746575	297	210	87
AC018816.3	1.12099	0.755027	1.66434	0.571117	1.04282	0.684684	1.58828	0.845147	0.508119	0.794702	0.253425	297	229	68
AC024560.2	0.74351	0.533701	1.0358	0.0797677	0.864954	0.608741	1.22901	0.418252	0.538964	0.642384	0.465753	297	123	174
AC025442.3	0.913257	0.66274	1.25847	0.579128	1.05771	0.753424	1.48489	0.745811	0.495283	0.556291	0.486301	297	139	158
AC064852.4	1.77592	1.10891	2.84413	0.0168393	1.24762	0.757909	2.05375	0.384318	0.521886	0.13245	0.952055	297	27	270
AC067956.1	0.587396	0.41121	0.83907	0.00345173	0.643617	0.440189	0.941058	0.0230028	0.552322	0.284768	0.842466	297	232	65
AC068039.4	1.56015	1.12332	2.16685	0.00795847	1.28729	0.910594	1.81983	0.152794	0.563685	0.384106	0.767123	297	92	205
AC068138.1	0.629262	0.444682	0.890457	0.00892451	0.633458	0.435068	0.922313	0.0172253	0.548149	0.311258	0.821918	297	225	72
AC068831.3	0.659656	0.460491	0.944963	0.0232891	0.610416	0.419372	0.888491	0.00995839	0.547038	0.735099	0.390411	297	98	199
AC069277.2 /// AF279782	0.578856	0.383876	0.872871	0.0090866	0.604898	0.382388	0.956887	0.0316898	0.539712	0.192053	0.910959	297	256	41
AC073283.7	0.788118	0.560443	1.10828	0.171035	0.788673	0.547715	1.13564	0.201882	0.520548	0.331126	0.746575	297	211	86
AC073321.4	1.54021	1.06256	2.23256	0.0225865	1.47308	1.00079	2.16826	0.0495358	0.529302	0.245033	0.856164	297	58	239
AC074212.6	0.68456	0.490605	0.955192	0.025769	0.725252	0.509642	1.03208	0.0743317	0.5391	0.364238	0.739726	297	205	92
AC078842.4 /// AK094915	0.810914	0.537879	1.22254	0.316995	0.978467	0.641555	1.49231	0.919488	0.494217	0.821192	0.239726	297	63	234
AC078883.3 /// AC078883.4	0.62378	0.452502	0.859887	0.00395599	0.738498	0.527984	1.03294	0.0766217	0.567881	0.556291	0.609589	297	157	140
AC079305.10	0.805202	0.585192	1.10793	0.183335	1.0118	0.728472	1.40533	0.94419	0.516239	0.496689	0.568493	297	160	137
AC079741.2	0.684123	0.496764	0.942145	0.0200742	0.879432	0.627848	1.23183	0.454896	0.546539	0.536424	0.59589	297	158	139
AC079767.4	1.21354	0.874911	1.68323	0.246282	0.901855	0.62862	1.29385	0.574821	0.520298	0.609272	0.465753	297	170	127
AC079807.4	1.38711	0.997934	1.92805	0.0514561	1.34745	0.951018	1.90914	0.0934521	0.529597	0.622517	0.493151	297	168	129
AC083843.1	1.54064	1.0415	2.279	0.030502	1.53288	0.9882	2.37777	0.0565247	0.540688	0.788079	0.335616	297	216	81
AC083949.1	0.932057	0.67628	1.28457	0.66727	0.827124	0.587021	1.16543	0.277969	0.50948	0.556291	0.5	297	141	156
AC084219.3	1.59846	1.0077	2.53555	0.0463089	1.7461	1.07257	2.84258	0.0249795	0.496303	0.139073	0.931507	297	31	266
AC087501.1	0.650144	0.469483	0.900325	0.0095395	0.56486	0.402693	0.792334	0.000939207	0.553524	0.602649	0.534247	297	139	158
AC090627.1	1.24798	0.869305	1.79161	0.22984	1.1738	0.805522	1.71044	0.404187	0.524154	0.264901	0.821918	297	66	231
AC091133.1	1.28828	0.902292	1.83939	0.163287	1.2386	0.853428	1.79762	0.260176	0.501406	0.721854	0.342466	297	205	92
AC091633.3	1.35484	0.98304	1.86725	0.0635319	1.0555	0.748095	1.48924	0.758417	0.533067	0.450331	0.657534	297	118	179
AC092155.4 /// BC038779	1.06452	0.768996	1.47361	0.706307	0.959552	0.682116	1.34983	0.812556	0.477093	0.403974	0.650685	297	112	185
AC092192.1	1.65894	1.18182	2.32869	0.00343955	1.54722	1.07035	2.23656	0.0202566	0.556246	0.331126	0.828767	297	75	222
AC092620.2	1.82708	1.26466	2.63963	0.00132373	1.5083	1.0273	2.21449	0.0359541	0.590992	0.748344	0.458904	297	192	105
AC092660.1	0.645021	0.468284	0.88846	0.00727777	0.740132	0.530333	1.03293	0.0768164	0.575229	0.543046	0.630137	297	162	135
AC092667.2	1.40925	0.949175	2.09233	0.0888901	1.31131	0.8677	1.98172	0.198302	0.510251	0.205298	0.876712	297	49	248
AC099684.1 /// BC040634	0.57611	0.377274	0.87974	0.0106741	0.540006	0.346126	0.842487	0.00662265	0.532183	0.834437	0.294521	297	69	228
AC099850.1 /// BC017255	0.759026	0.548795	1.04979	0.0956545	0.963565	0.680868	1.36364	0.834079	0.531298	0.596026	0.520548	297	138	159
AC100830.4	0.647541	0.453482	0.924644	0.0168013	0.655746	0.449961	0.955644	0.0280863	0.570852	0.728477	0.410959	297	102	195
AC104537.2 /// TCEB1P28	0.606768	0.40672	0.90521	0.0143688	0.776971	0.514247	1.17392	0.230738	0.56237	0.807947	0.328767	297	78	219
AC104667.3	1.30213	0.945836	1.79264	0.105542	1.24549	0.881785	1.75921	0.212785	0.52082	0.529801	0.554795	297	145	152
AC106801.1	0.738075	0.536348	1.01567	0.0622537	0.746614	0.533653	1.04456	0.0880991	0.516874	0.509934	0.575342	297	159	138
AC108056.1	0.706052	0.420328	1.186	0.188402	0.710263	0.407057	1.23932	0.228383	0.480269	0.112583	0.917808	297	269	28
AC112198.1	1.28104	0.925424	1.77331	0.135484	1.19768	0.852797	1.68203	0.297869	0.510818	0.596026	0.479452	297	166	131
AC114730.11	1.13172	0.812373	1.57661	0.464459	1.11249	0.768598	1.61024	0.572079	0.487708	0.364238	0.691781	297	100	197
AC114752.3	0.674252	0.472134	0.962894	0.0301635	0.889901	0.610423	1.29734	0.544194	0.548353	0.284768	0.828767	297	230	67
AC124997.1	0.750121	0.542808	1.03661	0.0814916	0.758324	0.540576	1.06378	0.109171	0.536174	0.430464	0.671233	297	185	112
AC128677.4 /// CH17-132F21.1 /// IGKV1OR-1 /// IGKV1OR-1 /// IGKV1OR10-1 /// IGKV1OR10-1 /// IGKV1OR2-2	0.673743	0.489475	0.92738	0.015417	0.497431	0.347724	0.711592	0.000132105	0.566089	0.490066	0.657534	297	174	123
AC136289.1	1.12958	0.819213	1.55754	0.45725	1.14122	0.821362	1.58564	0.431154	0.486324	0.556291	0.5	297	157	140
AC139100.2 /// PARD6G-AS1	0.490963	0.350175	0.688354	3.69257e-05	0.657916	0.457729	0.945657	0.0237084	0.623832	0.668874	0.589041	297	137	160
AC139100.3	0.802239	0.582957	1.104	0.176183	0.985019	0.706761	1.37283	0.928987	0.536424	0.490066	0.60274	297	166	131
AC141928.1	0.703897	0.509866	0.971767	0.0328406	0.727632	0.51627	1.02552	0.0693688	0.562869	0.576159	0.547945	297	145	152
AC144652.1	0.807361	0.586334	1.11171	0.189816	1.00908	0.70481	1.44471	0.960618	0.530346	0.536424	0.547945	297	151	146
AC145343.2	1.3002	0.939997	1.79842	0.112716	1.97373	1.37997	2.82297	0.000196217	0.540733	0.589404	0.506849	297	161	136
ACAA1	0.598527	0.434752	0.823997	0.00165068	0.696252	0.490275	0.988765	0.0430626	0.557471	0.503311	0.664384	297	173	124
ACAA2	0.599781	0.435415	0.826193	0.00175758	0.701495	0.5006	0.98301	0.0394456	0.58954	0.483444	0.691781	297	180	117
ACACA	0.771815	0.541959	1.09916	0.151044	1.04106	0.671282	1.61453	0.857369	0.527624	0.291391	0.787671	297	223	74
ACACB	1.93111	1.23826	3.01164	0.00370166	1.60197	0.992699	2.58518	0.0536129	0.577248	0.847682	0.321918	297	227	70
ACAD10	0.602336	0.43737	0.829523	0.00190533	0.722462	0.511223	1.02099	0.0654365	0.598385	0.529801	0.650685	297	167	130
ACAD11 /// NPHP3 /// NPHP3-ACAD11	2.01107	1.44061	2.80743	4.0471e-05	1.75295	1.21322	2.5328	0.00279644	0.655266	0.642384	0.616438	297	153	144
ACAD8	0.793486	0.560972	1.12237	0.191059	1.00254	0.691007	1.45451	0.98936	0.514878	0.701987	0.369863	297	100	197
ACAD9	0.863703	0.627092	1.18959	0.369677	1.2373	0.86988	1.75991	0.236215	0.516193	0.543046	0.527397	297	147	150
ACADL	1.53526	1.10175	2.13935	0.0113305	1.33663	0.944176	1.8922	0.101826	0.581103	0.635762	0.520548	297	166	131
ACADM	0.50615	0.236962	1.08113	0.0786619	0.637661	0.293777	1.38408	0.255146	0.508528	0.960265	0.10274	297	22	275
ACADS	0.462264	0.325832	0.655823	1.53212e-05	0.524477	0.353401	0.778368	0.00135605	0.598521	0.304636	0.863014	297	232	65
ACADSB	0.770361	0.559385	1.06091	0.110077	0.896161	0.628477	1.27786	0.544776	0.507167	0.543046	0.541096	297	149	148
ACADVL	0.751634	0.536792	1.05246	0.0964618	0.872524	0.60899	1.2501	0.45732	0.524086	0.357616	0.726027	297	205	92
ACAN	1.39068	0.973867	1.98588	0.0696337	1.42504	0.983507	2.06479	0.0611975	0.519414	0.278146	0.808219	297	70	227
ACAP1	1.86745	1.28405	2.71593	0.00108217	1.59194	1.08227	2.34163	0.0181998	0.568176	0.761589	0.424658	297	199	98
ACAP2	0.497142	0.360957	0.684707	1.87728e-05	0.518526	0.369902	0.726866	0.000138302	0.584324	0.496689	0.726027	297	183	114
ACAP3	1.171	0.850776	1.61175	0.332805	1.30114	0.931005	1.81844	0.123228	0.53597	0.523179	0.561644	297	143	154
ACAT1	1.17353	0.852578	1.61531	0.326299	1.14753	0.813684	1.61835	0.432731	0.505761	0.476821	0.60274	297	130	167
ACAT2	0.580383	0.421573	0.799018	0.000851381	0.804484	0.538635	1.20154	0.287823	0.612628	0.490066	0.712329	297	182	115
ACBD3	1.22393	0.764169	1.96031	0.400461	1.32824	0.810462	2.17681	0.260083	0.485258	0.86755	0.184932	297	250	47
ACBD4	1.40419	1.01215	1.94807	0.0421284	1.2307	0.877413	1.72624	0.229195	0.558559	0.390728	0.746575	297	96	201
ACBD5	0.510154	0.368828	0.705634	4.77024e-05	0.708669	0.473347	1.06098	0.0944296	0.633856	0.423841	0.80137	297	205	92
ACBD6	1.53718	1.06648	2.21563	0.0211638	1.84323	1.23922	2.74165	0.00253833	0.506124	0.258278	0.835616	297	63	234
ACCS	1.7412	1.17795	2.57375	0.00541292	1.41984	0.951379	2.11898	0.0861666	0.560963	0.788079	0.369863	297	211	86
ACD	0.78614	0.536304	1.15236	0.21751	0.92646	0.601655	1.42661	0.72874	0.504808	0.781457	0.315068	297	80	217
ACE	0.58518	0.298166	1.14847	0.119335	0.492112	0.245901	0.984843	0.0451653	0.46412	0.0662252	0.965753	297	283	14
ACE2	0.696964	0.504762	0.962351	0.0283013	0.660341	0.463317	0.941149	0.0217072	0.555929	0.437086	0.657534	297	182	115
ACER1	0.835488	0.601104	1.16126	0.284639	0.97395	0.689119	1.37651	0.881123	0.510319	0.629139	0.452055	297	123	174
ACER3	0.633933	0.448866	0.895303	0.00965778	0.709718	0.485544	1.03739	0.0766576	0.547945	0.317881	0.808219	297	222	75
ACHE	0.619929	0.437992	0.877438	0.00698377	0.691503	0.476924	1.00263	0.0516391	0.576703	0.701987	0.452055	297	112	185
ACIN1	0.61878	0.425347	0.900178	0.0120788	0.705513	0.47327	1.05172	0.0868212	0.573347	0.768212	0.390411	297	93	204
ACKR1	1.63983	1.17686	2.28493	0.0034766	1.13525	0.777819	1.65692	0.510835	0.586002	0.635762	0.554795	297	161	136
ACKR1 /// CADM3	0.658529	0.434173	0.998819	0.0493538	0.859783	0.556245	1.32896	0.49653	0.52835	0.18543	0.89726	297	255	42
ACKR2	0.637556	0.442716	0.918148	0.0155682	0.738594	0.501429	1.08793	0.125166	0.571714	0.748344	0.39726	297	97	200
ACKR3	1.87038	1.35791	2.57626	0.000126744	1.4821	1.03551	2.12128	0.0314992	0.617618	0.529801	0.691781	297	125	172
ACKR3 /// AK023507	1.73242	1.25405	2.39327	0.000859026	1.34299	0.944669	1.90925	0.100412	0.57439	0.576159	0.616438	297	143	154
ACKR4	0.540023	0.39197	0.743996	0.000164027	0.546614	0.387278	0.771506	0.000591685	0.581285	0.536424	0.664384	297	168	129
ACLY	0.759929	0.547209	1.05534	0.101319	0.929458	0.644369	1.34068	0.695507	0.559512	0.390728	0.753425	297	203	94
ACMSD	1.46733	1.02762	2.09518	0.0348683	1.57645	1.07964	2.30185	0.0184361	0.538873	0.278146	0.815068	297	69	228
ACN9	0.591911	0.426707	0.821076	0.00168578	0.88215	0.597483	1.30245	0.5282	0.593169	0.615894	0.575342	297	143	154
ACO1	0.799778	0.573264	1.1158	0.188493	1.06494	0.744573	1.52314	0.730408	0.497868	0.649007	0.424658	297	116	181
ACO2	0.647868	0.469009	0.894937	0.00845381	0.99936	0.695301	1.43639	0.99724	0.565046	0.430464	0.712329	297	191	106
ACOT1 /// ACOT2	1.01645	0.738782	1.39848	0.920163	1.07634	0.762143	1.52008	0.676149	0.465209	0.509934	0.506849	297	149	148
ACOT11	0.465145	0.244707	0.884158	0.0195086	0.684986	0.351164	1.33615	0.267048	0.535562	0.940397	0.150685	297	32	265
ACOT12	0.770092	0.555779	1.06705	0.11642	0.725418	0.519912	1.01216	0.0589094	0.532886	0.403974	0.678082	297	190	107
ACOT13	0.65956	0.471285	0.92305	0.015229	0.789304	0.555442	1.12163	0.186926	0.553933	0.662252	0.465753	297	120	177
ACOT4	1.50378	0.907674	2.49136	0.113219	1.98724	1.1416	3.45926	0.0151727	0.489567	0.887417	0.171233	297	255	42
ACOT6	1.76388	1.2798	2.43107	0.000525964	2.16918	1.53864	3.05813	9.91807e-06	0.582305	0.456954	0.739726	297	107	190
ACOT7	0.450621	0.326693	0.62156	1.18607e-06	0.505778	0.359203	0.712164	9.45774e-05	0.662297	0.463576	0.80137	297	199	98
ACOT8	1.13587	0.824779	1.56431	0.43526	1.09757	0.743296	1.62069	0.639682	0.485576	0.463576	0.575342	297	132	165
ACOT9	1.36025	0.985901	1.87673	0.061	1.27719	0.90904	1.79445	0.15846	0.530005	0.437086	0.650685	297	117	180
ACOX1	0.773742	0.53008	1.12941	0.183741	0.993176	0.63848	1.54492	0.975767	0.51456	0.238411	0.828767	297	237	60
ACOX2	1.75492	1.2376	2.48847	0.001598	1.54143	1.06048	2.2405	0.0233487	0.584369	0.701987	0.486301	297	181	116
ACOX3	0.481805	0.348493	0.666115	9.94663e-06	0.61385	0.43123	0.873807	0.00675447	0.577384	0.430464	0.780822	297	201	96
ACOXL	0.670748	0.439524	1.02361	0.0640631	0.646236	0.407625	1.02452	0.0633229	0.488796	0.178808	0.89726	297	256	41
ACP1	0.533079	0.386425	0.735391	0.000126935	0.730439	0.505718	1.05502	0.0940399	0.607729	0.562914	0.671233	297	165	132
ACP2	0.731898	0.528884	1.01284	0.0597017	0.747794	0.532184	1.05076	0.0939985	0.547129	0.417219	0.691781	297	190	107
ACP5	0.755399	0.539649	1.05741	0.102116	0.754433	0.527248	1.07951	0.123207	0.562438	0.350993	0.767123	297	211	86
ACP6	0.832057	0.604675	1.14495	0.258954	0.791754	0.560812	1.1178	0.184484	0.504717	0.516556	0.575342	297	158	139
ACPP	0.638446	0.462941	0.880487	0.00621811	0.761418	0.5385	1.07662	0.123009	0.583235	0.556291	0.59589	297	155	142
ACPT	0.733644	0.518608	1.03784	0.0801037	0.885964	0.611745	1.2831	0.521681	0.532636	0.311258	0.773973	297	218	79
ACR	0.700895	0.486672	1.00941	0.0561823	0.862174	0.582525	1.27607	0.458501	0.556178	0.748344	0.376712	297	94	203
ACRBP	0.639098	0.451662	0.904319	0.0114769	0.730152	0.502104	1.06178	0.099722	0.568629	0.311258	0.808219	297	223	74
ACRC	1.98735	1.44342	2.73625	2.56071e-05	1.57162	1.10804	2.22914	0.0112355	0.615531	0.509934	0.732877	297	116	181
ACRV1	0.578959	0.401785	0.834262	0.003366	0.711189	0.470751	1.07443	0.105459	0.551529	0.264901	0.863014	297	238	59
ACSBG1	1.55775	1.12413	2.15862	0.00774563	1.29584	0.921646	1.82197	0.136053	0.540461	0.397351	0.767123	297	94	203
ACSBG2	0.512219	0.346529	0.757131	0.00079261	0.786909	0.515427	1.20138	0.266967	0.611177	0.794702	0.390411	297	89	208
ACSF2	1.41325	1.02568	1.94727	0.0344275	1.29621	0.910452	1.84541	0.15002	0.565749	0.543046	0.59589	297	141	156
ACSF3	0.913389	0.656477	1.27084	0.590846	1.08485	0.762179	1.54413	0.651142	0.49873	0.377483	0.664384	297	192	105
ACSL1	0.972041	0.70013	1.34955	0.865494	1.06888	0.748991	1.52538	0.713556	0.481357	0.622517	0.417808	297	119	178
ACSL3	1.22673	0.864932	1.73986	0.251742	1.29164	0.891248	1.87191	0.176437	0.527851	0.298013	0.780822	297	77	220
ACSL4	1.56164	1.10818	2.20066	0.0108692	1.13769	0.790428	1.6375	0.487531	0.537785	0.317881	0.80137	297	77	220
ACSL5	0.654029	0.475144	0.90026	0.00920195	0.917526	0.638965	1.31753	0.64104	0.557153	0.529801	0.616438	297	162	135
ACSL6	1.55682	1.12371	2.15685	0.00778636	1.2856	0.911316	1.8136	0.152432	0.547265	0.403974	0.726027	297	101	196
ACSM1	0.68396	0.478838	0.976951	0.0367843	0.634456	0.434528	0.926371	0.0184733	0.53021	0.728477	0.390411	297	99	198
ACSM2A	1.2795	0.86972	1.88236	0.210822	1.26818	0.846652	1.89959	0.249125	0.536968	0.781457	0.308219	297	219	78
ACSM2A /// ACSM2B	1.3189	0.892603	1.94878	0.164653	1.25886	0.833044	1.90234	0.274474	0.524857	0.788079	0.273973	297	225	72
ACSM2B	1.52371	1.10485	2.10135	0.0102301	1.4772	1.05016	2.07788	0.0250186	0.52522	0.443709	0.69863	297	111	186
ACSM3	0.656918	0.473601	0.911192	0.0118339	0.684392	0.480069	0.975678	0.0360769	0.581012	0.615894	0.534247	297	137	160
ACSM5	1.35381	0.974966	1.87985	0.0705142	0.972882	0.674748	1.40274	0.88293	0.551347	0.384106	0.726027	297	98	199
ACSS1	1.19608	0.867021	1.65004	0.275393	1.05909	0.729494	1.5376	0.762797	0.528486	0.437086	0.650685	297	117	180
ACSS2	0.571389	0.402705	0.810731	0.00171631	0.534847	0.349863	0.81764	0.00385643	0.523814	0.304636	0.815068	297	225	72
ACSS3	1.85862	1.34999	2.55887	0.000144939	1.13097	0.746593	1.71324	0.561356	0.600018	0.496689	0.712329	297	117	180
ACTA1	1.38348	1.00243	1.90939	0.0483015	1.29498	0.930142	1.80292	0.125759	0.536106	0.443709	0.671233	297	115	182
ACTA2	2.30715	1.67234	3.18292	3.54177e-07	1.75688	1.20004	2.57209	0.00376015	0.668738	0.450331	0.815068	297	95	202
ACTA2-AS1	2.01148	1.42343	2.84245	7.45834e-05	1.66712	1.10721	2.51016	0.0143764	0.590538	0.311258	0.890411	297	63	234
ACTA2 /// ACTA2	2.01971	1.46529	2.78389	1.75893e-05	1.48004	1.02477	2.13756	0.0365787	0.651139	0.543046	0.712329	297	124	173
ACTB	0.567375	0.289005	1.11387	0.0996331	0.470644	0.232073	0.954467	0.0366945	0.490066	0.0662252	0.979452	297	285	12
ACTB /// ACTG1	0.765477	0.546798	1.07161	0.119466	0.832206	0.587175	1.17949	0.301965	0.546857	0.350993	0.780822	297	213	84
ACTBP9 /// ACTBP9	0.544007	0.376409	0.786229	0.00119567	0.524571	0.351329	0.783241	0.00160763	0.593169	0.258278	0.90411	297	245	52
ACTC1	2.08334	1.51229	2.87003	7.10294e-06	1.56497	1.09214	2.24253	0.0146808	0.619659	0.496689	0.739726	297	113	184
ACTG1P4 /// AMY1A /// AMY1B /// AMY1C /// AMY2A /// AMY2B	1.54259	1.07427	2.21509	0.018874	1.08348	0.736622	1.59367	0.683811	0.59013	0.735099	0.424658	297	195	102
ACTG1P4 /// AMY2B /// RNPC3	1.72633	1.2504	2.38341	0.000906901	1.39868	0.98237	1.99141	0.0627031	0.585367	0.569536	0.643836	297	138	159
ACTG2	2.14189	1.53034	2.99783	8.97609e-06	1.86878	1.2748	2.73951	0.0013551	0.658895	0.655629	0.616438	297	155	142
ACTL10	0.719354	0.509605	1.01543	0.0610844	0.819875	0.559607	1.20119	0.308099	0.542729	0.317881	0.794521	297	220	77
ACTL6A	0.743613	0.539615	1.02473	0.0701963	1.03544	0.715332	1.49879	0.853573	0.55425	0.456954	0.671233	297	181	116
ACTL6B	0.605168	0.435255	0.841411	0.0028186	0.642469	0.450387	0.916471	0.0146365	0.556881	0.384106	0.794521	297	210	87
ACTL7A	0.662755	0.468465	0.937624	0.0201356	0.895515	0.615949	1.30197	0.563287	0.560328	0.701987	0.431507	297	109	188
ACTL7B	0.482793	0.337488	0.690658	6.7224e-05	0.498929	0.340337	0.731423	0.000367385	0.575524	0.284768	0.883562	297	238	59
ACTL8	0.835913	0.593419	1.1775	0.305231	0.847272	0.587774	1.22134	0.37438	0.504536	0.324503	0.753425	297	213	84
ACTL9	0.761921	0.553548	1.04873	0.0953035	0.693873	0.493056	0.976481	0.0360383	0.530119	0.523179	0.561644	297	155	142
ACTN1	1.79944	1.30342	2.4842	0.000356222	1.65287	1.16009	2.35499	0.00540098	0.615395	0.562914	0.643836	297	137	160
ACTN2	2.58183	1.79246	3.71882	3.49735e-07	2.17656	1.37703	3.44032	0.000869623	0.595029	0.264901	0.931507	297	50	247
ACTN3	1.12781	0.795541	1.59885	0.499391	1.07578	0.743741	1.55605	0.698117	0.486868	0.298013	0.753425	297	81	216
ACTN4	0.7405	0.537996	1.01923	0.0653118	0.883261	0.622751	1.25275	0.48631	0.552028	0.490066	0.609589	297	167	130
ACTR10	1.46218	1.04122	2.05332	0.0282966	1.32088	0.921115	1.89414	0.130233	0.546222	0.331126	0.780822	297	82	215
ACTR1A	0.680555	0.490164	0.944899	0.0215353	0.745569	0.524551	1.05971	0.1017	0.515649	0.390728	0.726027	297	199	98
ACTR1B	1.06303	0.772262	1.46329	0.707727	1.31637	0.934735	1.85382	0.115582	0.48231	0.516556	0.513699	297	149	148
ACTR2	0.639847	0.46403	0.88228	0.00644914	0.764963	0.5479	1.06802	0.115604	0.582056	0.456954	0.726027	297	189	108
ACTR3	0.613631	0.445092	0.84599	0.00287509	0.612688	0.438798	0.855488	0.0040226	0.585503	0.556291	0.636986	297	161	136
ACTR3B	0.621871	0.449487	0.860366	0.00413069	0.834586	0.572232	1.21722	0.347693	0.58641	0.596026	0.60274	297	150	147
ACTR3BP2	0.58671	0.40712	0.845521	0.00423663	0.627503	0.426862	0.922452	0.0177598	0.562415	0.264901	0.849315	297	236	61
ACTR3BP2 /// ACTR3BP5	0.687618	0.499619	0.94636	0.0215452	0.77959	0.555106	1.09486	0.150729	0.537467	0.509934	0.609589	297	164	133
ACTR3C	0.670332	0.484945	0.92659	0.015454	0.759362	0.532275	1.08333	0.128902	0.578382	0.423841	0.726027	297	194	103
ACTR3P2 /// ACTR3P2	0.594472	0.407172	0.86793	0.00706953	0.758707	0.50981	1.12912	0.173418	0.566044	0.774834	0.383562	297	91	206
ACTR5	1.64339	1.12118	2.40885	0.0108893	1.955	1.28832	2.96667	0.00162974	0.507394	0.225166	0.869863	297	53	244
ACTR6	0.63538	0.461705	0.874385	0.0053702	0.712841	0.499119	1.01808	0.0626831	0.567767	0.503311	0.657534	297	172	125
ACTR8	0.704174	0.507706	0.976671	0.0356063	0.773865	0.542872	1.10315	0.156409	0.55044	0.397351	0.719178	297	197	100
ACTRT2	0.500782	0.36261	0.691604	2.68598e-05	0.6953	0.484221	0.998391	0.0489893	0.616075	0.443709	0.787671	297	200	97
ACTRT3	0.736998	0.472763	1.14892	0.177933	0.838567	0.526241	1.33626	0.458935	0.531389	0.854305	0.232877	297	57	240
ACVR1	1.60945	1.16678	2.22005	0.00373264	1.40696	0.978466	2.02312	0.0654038	0.565885	0.443709	0.691781	297	112	185
ACVR1B	1.33428	0.914015	1.94779	0.135136	1.58487	1.04121	2.41239	0.0316852	0.476322	0.231788	0.828767	297	60	237
ACVR1C	0.505005	0.360107	0.708206	7.50597e-05	0.578868	0.402326	0.832877	0.00322815	0.592035	0.668874	0.547945	297	131	166
ACVR2A	1.56454	1.04293	2.34702	0.0305337	1.8653	1.21754	2.85768	0.00417918	0.53969	0.192053	0.917808	297	41	256
ACVR2B	1.30271	0.943066	1.79951	0.108639	1.36386	0.948977	1.96014	0.0935505	0.523587	0.423841	0.657534	297	114	183
ACVR2B-AS1	0.711463	0.514149	0.9845	0.0399539	0.741659	0.523926	1.04988	0.0918983	0.555815	0.417219	0.705479	297	192	105
ACVRL1	1.32927	0.959356	1.84181	0.0871561	0.803144	0.54492	1.18373	0.267999	0.544951	0.602649	0.506849	297	163	134
ACY1	1.38519	0.986666	1.94467	0.0597799	1.20067	0.840359	1.71546	0.315107	0.522272	0.331126	0.773973	297	83	214
ACY3	0.407137	0.2692	0.615752	2.06887e-05	0.55434	0.339579	0.904924	0.0182988	0.563413	0.192053	0.952055	297	262	35
ACYP1	0.636535	0.445772	0.908933	0.012944	0.824228	0.546825	1.24236	0.355816	0.582328	0.728477	0.431507	297	105	192
ACYP2 /// LOC101927144	1.47334	1.0617	2.04457	0.0204445	1.35369	0.968294	1.89248	0.0764789	0.572848	0.390728	0.746575	297	96	201
ADA	0.844998	0.612518	1.16571	0.304923	0.757666	0.536683	1.06964	0.114723	0.528395	0.443709	0.636986	297	178	119
ADAD1	0.699961	0.506341	0.967618	0.0308338	0.798823	0.561822	1.1358	0.210995	0.566044	0.423841	0.69863	297	190	107
ADAD2	0.608648	0.442068	0.837999	0.00234054	0.689304	0.49155	0.966614	0.0310215	0.585049	0.523179	0.664384	297	170	127
ADAL	1.55445	0.938352	2.57505	0.0867337	1.29652	0.772222	2.17679	0.325976	0.519187	0.887417	0.205479	297	250	47
ADAM10	0.619248	0.442384	0.866821	0.00522457	0.927782	0.635635	1.3542	0.697652	0.612674	0.662252	0.527397	297	129	168
ADAM11	0.688659	0.500072	0.948364	0.0223307	0.755586	0.532993	1.07114	0.115487	0.557199	0.536424	0.582192	297	156	141
ADAM12	0.76092	0.550788	1.05122	0.0975139	0.820823	0.581446	1.15875	0.261695	0.511295	0.430464	0.684932	297	187	110
ADAM15	0.555464	0.403268	0.765099	0.000319602	0.552828	0.391586	0.780464	0.00075509	0.595754	0.496689	0.691781	297	178	119
ADAM17	0.865564	0.628529	1.19199	0.376545	1.00946	0.711774	1.43164	0.957885	0.523406	0.543046	0.547945	297	150	147
ADAM18	0.84143	0.608726	1.16309	0.295896	0.899452	0.63642	1.2712	0.548235	0.532659	0.423841	0.678082	297	187	110
ADAM19	2.24963	1.5875	3.18792	5.15466e-06	1.54117	0.991545	2.39546	0.0545769	0.571714	0.304636	0.89726	297	61	236
ADAM1A /// ADAM1A	0.852901	0.615816	1.18126	0.338315	0.881753	0.623325	1.24733	0.477012	0.51887	0.410596	0.664384	297	187	110
ADAM2	1.19669	0.860942	1.66337	0.285178	1.22057	0.860693	1.73091	0.263451	0.526944	0.622517	0.458904	297	173	124
ADAM20	0.571529	0.401227	0.814118	0.00194011	0.645312	0.445672	0.934381	0.0203764	0.614261	0.721854	0.465753	297	111	186
ADAM21	0.708584	0.513621	0.977553	0.0358834	0.953256	0.664485	1.36752	0.794861	0.553524	0.443709	0.691781	297	186	111
ADAM22	2.04519	1.17939	3.54657	0.0108521	1.67486	0.945045	2.96828	0.0773332	0.521818	0.907285	0.212329	297	252	45
ADAM23	2.19228	1.52944	3.14238	1.92857e-05	1.69623	1.09773	2.62106	0.0173164	0.60274	0.271523	0.90411	297	55	242
ADAM28	1.34048	0.974101	1.84466	0.0720385	1.09905	0.770431	1.56783	0.602329	0.533974	0.509934	0.609589	297	134	163
ADAM29 /// LOC101928551	1.28493	0.932634	1.77031	0.125178	1.122	0.804301	1.56519	0.497939	0.548943	0.543046	0.561644	297	146	151
ADAM30	0.744591	0.537315	1.03183	0.0764374	0.927018	0.650574	1.32093	0.674897	0.530255	0.609272	0.5	297	133	164
ADAM32	1.60176	1.15672	2.21803	0.00456029	1.87661	1.31797	2.67203	0.000480669	0.57092	0.589404	0.582192	297	150	147
ADAM33	2.07081	1.48291	2.89179	1.93312e-05	1.26206	0.839097	1.89822	0.263744	0.618797	0.357616	0.869863	297	73	224
ADAM3A	0.802608	0.579759	1.11112	0.185158	0.928766	0.65747	1.31201	0.675024	0.528645	0.410596	0.678082	297	189	108
ADAM3B /// ADAM3B	0.864786	0.628202	1.19047	0.373015	0.766829	0.547736	1.07356	0.121981	0.487685	0.523179	0.506849	297	147	150
ADAM5	1.38902	1.00563	1.91857	0.0461507	1.35055	0.957285	1.90537	0.0870146	0.557153	0.423841	0.69863	297	108	189
ADAM6	0.544617	0.346258	0.85661	0.00854467	0.731478	0.452702	1.18193	0.201522	0.529529	0.152318	0.945205	297	267	30
ADAM7	0.722319	0.516181	1.01078	0.0577701	0.68355	0.475703	0.982211	0.0396854	0.545405	0.662252	0.445205	297	117	180
ADAM8	0.776123	0.556282	1.08284	0.135815	0.873587	0.616291	1.2383	0.447721	0.524041	0.649007	0.438356	297	118	179
ADAM9	0.540099	0.383261	0.761119	0.000432248	0.77927	0.53834	1.12803	0.186308	0.620702	0.688742	0.527397	297	125	172
ADAMDEC1	0.593227	0.429358	0.819638	0.00154671	0.430252	0.297666	0.621894	7.22365e-06	0.586592	0.582781	0.630137	297	156	141
ADAMTS1	2.06383	1.4585	2.92041	4.30033e-05	1.52224	1.02495	2.2608	0.0373363	0.644108	0.695364	0.554795	297	170	127
ADAMTS10	1.61695	1.10762	2.3605	0.0127934	1.36272	0.919164	2.02032	0.123459	0.572077	0.768212	0.390411	297	205	92
ADAMTS12	0.818254	0.593141	1.1288	0.221747	0.745791	0.530507	1.04844	0.0914539	0.508392	0.443709	0.650685	297	180	117
ADAMTS13	0.562238	0.363254	0.870221	0.00977535	1.21614	0.72284	2.04608	0.461003	0.515558	0.165563	0.924658	297	262	35
ADAMTS14	1.26967	0.895704	1.79978	0.179848	1.04692	0.723301	1.51532	0.807996	0.536945	0.298013	0.780822	297	77	220
ADAMTS15	0.705824	0.492796	1.01094	0.0573538	0.732449	0.500669	1.07153	0.108703	0.545088	0.735099	0.356164	297	93	204
ADAMTS16	1.68642	1.20502	2.36012	0.00230737	1.46725	1.01892	2.11285	0.0393301	0.540778	0.344371	0.80137	297	81	216
ADAMTS17	1.68351	1.08668	2.60813	0.0196932	1.60584	0.98572	2.61609	0.0571449	0.534065	0.15894	0.931507	297	34	263
ADAMTS18	0.718408	0.50787	1.01623	0.0616219	0.696332	0.484783	1.0002	0.050124	0.514651	0.701987	0.40411	297	105	192
ADAMTS19	0.810458	0.577341	1.1377	0.224579	0.942956	0.659037	1.34919	0.747945	0.501996	0.675497	0.390411	297	107	190
ADAMTS2	1.30359	0.939932	1.80793	0.112119	1.05754	0.73657	1.51838	0.761759	0.517373	0.390728	0.684932	297	105	192
ADAMTS20	0.550183	0.38929	0.777573	0.000710846	0.546007	0.383872	0.776624	0.00076189	0.578382	0.695364	0.493151	297	119	178
ADAMTS3	1.84932	1.33143	2.56866	0.000244893	1.28525	0.883167	1.87038	0.189878	0.624376	0.615894	0.60274	297	151	146
ADAMTS4	0.854585	0.605356	1.20642	0.371733	1.12726	0.784961	1.61882	0.516514	0.494421	0.695364	0.376712	297	102	195
ADAMTS5	1.6547	1.16966	2.34088	0.00443624	1.28184	0.879498	1.86823	0.1964	0.575524	0.695364	0.472603	297	182	115
ADAMTS6	1.59062	1.15419	2.19208	0.00456467	1.32871	0.932005	1.89428	0.116234	0.582146	0.450331	0.719178	297	109	188
ADAMTS7	0.616381	0.445514	0.852778	0.00348396	0.577439	0.408243	0.816758	0.00190856	0.569128	0.417219	0.726027	297	195	102
ADAMTS8	2.4191	1.67962	3.48415	2.07599e-06	1.81609	1.10631	2.98127	0.0183016	0.606958	0.264901	0.931507	297	50	247
ADAMTS9	1.6135	1.145	2.27368	0.00626235	1.20439	0.841959	1.72282	0.308603	0.56364	0.317881	0.815068	297	75	222
ADAMTS9-AS2	3.14484	2.16582	4.56641	1.73225e-09	2.62541	1.61222	4.27535	0.000104599	0.614306	0.251656	0.965753	297	43	254
ADAMTSL1	1.65601	1.19267	2.29935	0.00259423	1.17494	0.815439	1.69293	0.386979	0.572576	0.615894	0.575342	297	155	142
ADAMTSL2	1.71425	1.07992	2.72119	0.0222506	1.61583	0.994472	2.62543	0.0526746	0.52717	0.139073	0.945205	297	29	268
ADAMTSL3	2.04531	1.46335	2.8587	2.80614e-05	1.53717	1.04895	2.25262	0.0274493	0.642112	0.649007	0.60274	297	156	141
ADAMTSL4	1.36572	0.992267	1.87974	0.0558333	1.46911	1.05752	2.04088	0.0218237	0.532341	0.483444	0.630137	297	127	170
ADAMTSL5	0.526784	0.377897	0.734331	0.000155566	0.483687	0.338606	0.690929	6.55122e-05	0.567949	0.370861	0.80137	297	213	84
ADAP1	0.551398	0.393889	0.771893	0.000523381	0.623041	0.428111	0.906727	0.0134583	0.54604	0.350993	0.808219	297	217	80
ADAP2	1.56727	1.11951	2.19412	0.0088555	1.00137	0.671702	1.49283	0.994652	0.562914	0.655629	0.486301	297	174	123
ADAR	1.12078	0.813545	1.54403	0.48546	1.11855	0.790261	1.58323	0.527364	0.463009	0.543046	0.486301	297	157	140
ADARB1	1.94688	1.4128	2.68286	4.65613e-05	1.38865	0.937686	2.05651	0.10125	0.611177	0.470199	0.746575	297	108	189
ADARB2	0.680715	0.492447	0.940959	0.0198924	0.772722	0.547093	1.0914	0.14333	0.560691	0.589404	0.541096	297	142	155
ADARB2-AS1	0.70751	0.513276	0.975245	0.0345966	0.846675	0.603103	1.18862	0.336234	0.559376	0.456954	0.678082	297	182	115
ADAT1	0.720752	0.522908	0.993453	0.0454909	0.828391	0.589814	1.16347	0.277331	0.53343	0.456954	0.657534	297	179	118
ADAT2	0.571947	0.410206	0.79746	0.00098591	0.746553	0.514652	1.08295	0.123539	0.60909	0.642384	0.547945	297	135	162
ADAT3	0.544496	0.395121	0.750342	0.00020278	0.614673	0.429418	0.879849	0.00782635	0.611222	0.516556	0.678082	297	173	124
ADAT3 /// SCAMP4	0.499237	0.353454	0.705149	8.05553e-05	0.682176	0.465437	0.999843	0.0499057	0.631271	0.695364	0.541096	297	126	171
ADCK1	0.648715	0.447391	0.940634	0.0224423	0.684955	0.461036	1.01763	0.0610064	0.542139	0.251656	0.849315	297	238	59
ADCK2	0.666638	0.484343	0.917546	0.0128492	0.928769	0.651535	1.32397	0.682895	0.553479	0.523179	0.616438	297	163	134
ADCK3	0.666019	0.441708	1.00424	0.0524088	0.814736	0.529108	1.25455	0.35222	0.534156	0.192053	0.890411	297	253	44
ADCK4	1.37093	0.996277	1.88648	0.0527376	1.82998	1.27344	2.62977	0.00108856	0.526898	0.490066	0.636986	297	127	170
ADCK5	0.583183	0.421301	0.807268	0.00115196	0.728286	0.509763	1.04048	0.0815204	0.580513	0.417219	0.746575	297	198	99
ADCY1	1.54134	1.11636	2.12811	0.00856913	1.25027	0.882535	1.77124	0.20881	0.546539	0.430464	0.712329	297	107	190
ADCY10	0.844911	0.606406	1.17722	0.319329	0.792197	0.555907	1.12892	0.197409	0.529711	0.370861	0.705479	297	199	98
ADCY10P1	1.6508	1.16375	2.34167	0.00495202	1.55737	1.06587	2.27551	0.0220413	0.549578	0.298013	0.835616	297	69	228
ADCY2	1.97731	1.43244	2.72946	3.39872e-05	1.62275	1.13075	2.32882	0.00862228	0.630046	0.562914	0.684932	297	131	166
ADCY3	0.894369	0.63342	1.26282	0.525923	0.966472	0.663652	1.40747	0.858865	0.498866	0.695364	0.363014	297	100	197
ADCY4	2.16355	1.47007	3.18417	9.07019e-05	1.4437	0.943589	2.20889	0.0905765	0.645877	0.781457	0.452055	297	198	99
ADCY5	2.5608	1.59399	4.114	0.000101276	1.69956	0.922202	3.13219	0.0890715	0.55797	0.13245	0.972603	297	24	273
ADCY6	0.635931	0.448625	0.90144	0.0109954	0.961622	0.658057	1.40523	0.839762	0.546584	0.311258	0.821918	297	226	71
ADCY7	0.724708	0.52282	1.00456	0.0532759	0.554395	0.388896	0.790325	0.00111132	0.56246	0.609272	0.534247	297	138	159
ADCY8	0.668655	0.483304	0.92509	0.0150953	0.868798	0.615567	1.2262	0.423702	0.57278	0.417219	0.712329	297	193	104
ADCY9	1.57265	1.13131	2.18616	0.00705758	1.26488	0.882392	1.81317	0.200912	0.579334	0.622517	0.527397	297	163	134
ADCYAP1	0.793161	0.573432	1.09709	0.161479	0.594484	0.413937	0.85378	0.00486395	0.494693	0.417219	0.650685	297	184	113
ADCYAP1R1	1.23018	0.848738	1.78305	0.273989	1.16689	0.779913	1.74589	0.452774	0.502586	0.245033	0.815068	297	64	233
ADD1	1.35251	0.980947	1.86482	0.0653902	1.13706	0.802942	1.61021	0.469317	0.559648	0.443709	0.684932	297	113	184
ADD2	1.3147	0.955345	1.80924	0.0930456	1.24226	0.895132	1.72401	0.194492	0.51642	0.496689	0.609589	297	132	165
ADD3	1.61257	0.973363	2.67154	0.0635755	1.17774	0.688541	2.01451	0.55027	0.515014	0.887417	0.191781	297	252	45
ADD3-AS1	1.15316	0.837578	1.58765	0.382376	1.23695	0.875286	1.74806	0.228168	0.498685	0.529801	0.541096	297	147	150
ADGB	1.23496	0.892162	1.70949	0.203324	1.32335	0.944444	1.85426	0.103557	0.537104	0.596026	0.493151	297	164	133
ADH1A	0.861683	0.625911	1.18627	0.361393	1.03146	0.722172	1.47321	0.864769	0.489862	0.476821	0.561644	297	162	135
ADH1B	1.72933	1.25233	2.388	0.000879538	1.30814	0.905424	1.88998	0.152499	0.615622	0.430464	0.760274	297	100	197
ADH1C	0.677432	0.418586	1.09634	0.112853	0.566047	0.33757	0.949165	0.0309442	0.494602	0.880795	0.184932	297	46	251
ADH4	1.47319	1.01978	2.12819	0.0389844	1.155	0.785273	1.6988	0.464156	0.547673	0.748344	0.390411	297	202	95
ADH5	1.85457	1.30769	2.63015	0.000530604	1.76442	1.18725	2.6222	0.00496863	0.558469	0.298013	0.849315	297	67	230
ADH6	0.816597	0.592969	1.12456	0.214623	0.94661	0.671457	1.33452	0.754182	0.484714	0.543046	0.513699	297	145	152
ADH7	1.172	0.808712	1.69848	0.401803	1.09442	0.739461	1.61977	0.651959	0.497777	0.245033	0.808219	297	65	232
ADHFE1	1.72496	1.25179	2.37697	0.00085985	1.23434	0.870052	1.75115	0.238057	0.600245	0.456954	0.760274	297	104	193
ADI1	0.682322	0.494861	0.940798	0.0196838	0.808821	0.567669	1.15242	0.240149	0.547673	0.456954	0.691781	297	184	113
ADIG	0.65019	0.425939	0.992507	0.0460629	0.761231	0.479295	1.20901	0.24775	0.508573	0.178808	0.89726	297	256	41
ADIPOQ	1.45737	1.05849	2.00657	0.0209813	1.40362	1.007	1.95646	0.0453751	0.543772	0.529801	0.616438	297	136	161
ADIPOR1	0.736393	0.533526	1.0164	0.0627388	0.815112	0.577578	1.15033	0.244779	0.539962	0.576159	0.554795	297	146	151
ADIPOR2	1.08849	0.788623	1.50238	0.606063	1.16514	0.825512	1.64449	0.38467	0.47977	0.430464	0.60274	297	123	174
ADIRF	1.30904	0.949342	1.80501	0.10042	1.424	0.998481	2.03085	0.0509891	0.558673	0.556291	0.568493	297	147	150
ADIRF-AS1	0.830897	0.596371	1.15765	0.273603	0.816852	0.576912	1.15658	0.254238	0.510047	0.370861	0.684932	297	196	101
ADK	0.552419	0.394124	0.774292	0.000571301	0.717413	0.494444	1.04093	0.080336	0.608183	0.668874	0.541096	297	130	167
ADM	0.811646	0.581673	1.13254	0.219545	1.02333	0.722125	1.45017	0.896833	0.54858	0.649007	0.458904	297	121	176
ADM2	0.591597	0.429662	0.814565	0.00129602	0.557805	0.392317	0.793101	0.00115045	0.539826	0.490066	0.678082	297	177	120
ADM5	1.58585	1.15092	2.18516	0.00481191	1.22647	0.860901	1.74727	0.258258	0.571895	0.456954	0.705479	297	112	185
ADNP	1.56449	1.13635	2.15394	0.00607831	1.75035	1.21638	2.51873	0.00257103	0.553797	0.476821	0.678082	297	119	178
ADNP2	0.836648	0.607291	1.15263	0.275254	1.11127	0.781008	1.5812	0.557646	0.541232	0.549669	0.547945	297	149	148
ADO	0.802554	0.567441	1.13508	0.21365	1.06784	0.73439	1.5527	0.731103	0.529529	0.701987	0.390411	297	103	194
ADORA1	0.603602	0.383769	0.949362	0.0288989	0.69252	0.419414	1.14346	0.151	0.525946	0.152318	0.931507	297	265	32
ADORA2A-AS1	0.595498	0.432631	0.819678	0.00147419	0.82931	0.58685	1.17195	0.288811	0.582283	0.516556	0.678082	297	173	124
ADORA2A /// SPECC1L-ADORA2A	1.1991	0.850977	1.68962	0.299412	1.02625	0.713748	1.47558	0.888771	0.501043	0.317881	0.726027	297	88	209
ADORA2B	0.570466	0.368661	0.882741	0.011739	0.88156	0.544529	1.42719	0.608056	0.572621	0.847682	0.287671	297	66	231
ADORA3	0.869047	0.631323	1.19629	0.389346	0.697476	0.489912	0.992979	0.0456021	0.50313	0.516556	0.561644	297	156	141
ADPGK	0.745662	0.536832	1.03573	0.0800196	0.907656	0.635794	1.29576	0.593726	0.558423	0.390728	0.719178	297	198	99
ADPRH	1.59837	1.12384	2.27327	0.00906516	1.28219	0.868817	1.89224	0.210646	0.571714	0.708609	0.431507	297	190	107
ADPRHL1	0.539012	0.391313	0.742459	0.000155223	0.647179	0.454614	0.921312	0.0157444	0.605416	0.536424	0.671233	297	169	128
ADPRHL2	0.771042	0.5569	1.06753	0.117274	0.97209	0.67141	1.40742	0.880828	0.546516	0.602649	0.506849	297	135	162
ADPRM	0.771578	0.55228	1.07795	0.128517	0.756286	0.521724	1.0963	0.14032	0.530618	0.655629	0.438356	297	117	180
ADRA1A	0.73349	0.498237	1.07982	0.116237	0.64782	0.431586	0.972391	0.0361646	0.509662	0.225166	0.835616	297	240	57
ADRA1B	0.802941	0.582856	1.10613	0.179331	0.831387	0.599227	1.15349	0.269041	0.520934	0.543046	0.534247	297	148	149
ADRA1D	0.699162	0.421978	1.15842	0.164789	0.872965	0.517964	1.47128	0.609964	0.487708	0.119205	0.931507	297	270	27
ADRA2A	1.75911	1.15259	2.68479	0.0088376	2.01828	1.28879	3.16067	0.00215083	0.543001	0.827815	0.321918	297	224	73
ADRA2B	0.806773	0.586154	1.11043	0.187733	0.971738	0.689577	1.36935	0.869876	0.532069	0.483444	0.60274	297	167	130
ADRA2C	1.49063	1.0538	2.10852	0.0240611	1.36253	0.947862	1.95861	0.0947686	0.568221	0.695364	0.438356	297	187	110
ADRB1	0.653061	0.465134	0.916916	0.0138571	0.714715	0.498911	1.02387	0.0670473	0.539463	0.337748	0.787671	297	216	81
ADRB2	1.9665	1.33621	2.89409	0.000603406	1.56449	1.02213	2.39465	0.0393288	0.607865	0.781457	0.417808	297	203	94
ADRB3	2.05067	1.34228	3.13293	0.000895899	1.3953	0.830583	2.34398	0.208174	0.536515	0.172185	0.945205	297	34	263
ADRBK1	0.620667	0.433263	0.889132	0.00930316	0.575951	0.390314	0.849879	0.00544635	0.557471	0.278146	0.842466	297	233	64
ADRBK2	1.76447	1.26998	2.45148	0.000713143	1.39901	0.973896	2.00968	0.0692421	0.602105	0.615894	0.561644	297	157	140
ADRM1	1.1018	0.786344	1.54381	0.573222	1.06048	0.710307	1.58327	0.773993	0.48671	0.662252	0.383562	297	190	107
ADSL	1.63673	0.9431	2.8405	0.0798281	1.77705	0.99537	3.17261	0.0518628	0.50254	0.0927152	0.958904	297	20	277
ADSS	0.573672	0.405435	0.81172	0.00170177	0.781272	0.533326	1.14449	0.205105	0.606867	0.701987	0.5	297	119	178
ADSSL1	1.85526	1.00395	3.42844	0.0485467	2.78731	1.43302	5.42148	0.00252858	0.530436	0.927152	0.150685	297	264	33
ADTRP	0.621103	0.421972	0.914203	0.0157445	0.809773	0.53132	1.23416	0.32639	0.547582	0.788079	0.342466	297	83	214
AEBP1	1.78349	1.29059	2.46464	0.000455492	1.10086	0.713228	1.69918	0.664345	0.607639	0.423841	0.767123	297	98	199
AEBP2	0.707216	0.482471	1.03665	0.0758201	0.746791	0.497719	1.1205	0.158434	0.536605	0.231788	0.876712	297	245	52
AEN	0.644721	0.466691	0.890665	0.00776233	0.759289	0.532642	1.08238	0.127923	0.563322	0.430464	0.712329	297	191	106
AES	1.23506	0.894259	1.70575	0.199999	1.28773	0.913979	1.81432	0.148253	0.534564	0.576159	0.520548	297	157	140
AF001548.5	1.34898	0.927399	1.96219	0.117411	1.36009	0.921888	2.00659	0.121128	0.50415	0.238411	0.835616	297	60	237
AF007147	1.59406	1.13535	2.23809	0.00707775	1.15448	0.7988	1.66854	0.444585	0.572099	0.668874	0.5	297	174	123
AF067845.1	1.30615	0.942696	1.80975	0.108431	1.2942	0.922371	1.81592	0.135607	0.51794	0.397351	0.705479	297	103	194
AF070581	2.27316	1.63393	3.16245	1.09072e-06	1.94642	1.29587	2.92355	0.00133346	0.61535	0.384106	0.849315	297	80	217
AF075036 /// OR7D2	0.533061	0.357116	0.795692	0.0020826	0.592328	0.389816	0.900047	0.0141556	0.524177	0.205298	0.90411	297	253	44
AF086102 /// RP5-994D16.3	1.24327	0.783905	1.97182	0.354796	1.39557	0.858444	2.26878	0.17884	0.495147	0.860927	0.178082	297	250	47
AF086125 /// RP11-61A14.1	0.547458	0.395906	0.757025	0.000269199	0.477866	0.340021	0.671592	2.11202e-05	0.607956	0.582781	0.630137	297	156	141
AF086126 /// C16orf52	0.695372	0.502694	0.961903	0.0281928	0.772998	0.550229	1.08596	0.137671	0.562415	0.596026	0.547945	297	142	155
AF086154 /// RP11-432J24.5	0.701928	0.509834	0.966398	0.0300467	0.744207	0.536368	1.03258	0.0770485	0.553162	0.529801	0.616438	297	162	135
AF086184	1.25463	0.735974	2.13881	0.404548	1.3117	0.755639	2.27695	0.334936	0.484986	0.0993377	0.924658	297	26	271
AF086219 /// CTD-2647L4.1	0.518685	0.254402	1.05752	0.0709025	0.72604	0.349542	1.50807	0.390665	0.514492	0.953642	0.116438	297	25	272
AF086288 /// RP11-768F21.1	1.37527	0.98695	1.91639	0.0597865	1.07996	0.763868	1.52686	0.663269	0.51828	0.364238	0.753425	297	91	206
AF086294 /// RP11-485M7.3	1.40209	1.01355	1.93959	0.0412277	1.47666	1.05081	2.07508	0.0247362	0.526785	0.410596	0.69863	297	106	191
AF090939	1.65668	1.19994	2.28725	0.00215785	1.38404	0.966354	1.98225	0.0761904	0.569627	0.569536	0.60274	297	144	153
AF131215.3 /// C8orf15	1.37717	1.00064	1.89539	0.0495406	1.02591	0.728941	1.44387	0.883362	0.548807	0.496689	0.630137	297	129	168
AF131215.4	0.832126	0.60436	1.14573	0.26007	0.848057	0.599237	1.20019	0.352318	0.501633	0.516556	0.554795	297	155	142
AF131215.8	1.268	0.914248	1.75863	0.154806	1.20841	0.848759	1.72046	0.293611	0.534564	0.609272	0.493151	297	166	131
AF186192.1	1.83722	1.32369	2.54998	0.000276377	1.74176	1.23195	2.46253	0.00168617	0.55924	0.390728	0.787671	297	90	207
AF198444	1.46595	1.06467	2.01846	0.0190792	1.08951	0.769092	1.54343	0.62948	0.598771	0.470199	0.705479	297	114	183
AF213884.2	1.13515	0.777761	1.65676	0.511113	1.14659	0.758212	1.73392	0.516816	0.508392	0.768212	0.287671	297	220	77
AF279780	1.3293	0.955329	1.84966	0.0912524	1.29493	0.908292	1.84614	0.153186	0.530187	0.370861	0.712329	297	98	199
AF289551	3.08416	1.36247	6.98146	0.00689252	2.20906	0.958857	5.08936	0.062702	0.542547	0.960265	0.157534	297	268	29
AF520793	2.12455	1.43729	3.14042	0.000157269	1.5364	1.01389	2.32818	0.042868	0.627778	0.788079	0.438356	297	201	96
AFAP1	1.72869	1.24004	2.4099	0.00124124	1.28805	0.856287	1.93751	0.224308	0.584641	0.364238	0.808219	297	83	214
AFAP1-AS1	0.51144	0.322364	0.811413	0.00440797	0.773086	0.462683	1.29173	0.325794	0.57625	0.86755	0.287671	297	63	234
AFAP1L1	1.69073	1.22228	2.33872	0.00151118	1.20376	0.832353	1.7409	0.32454	0.581285	0.582781	0.589041	297	148	149
AFAP1L2	0.915754	0.663391	1.26412	0.592614	0.888352	0.634826	1.24313	0.489851	0.477025	0.576159	0.465753	297	133	164
AFF1	1.3993	1.0148	1.92949	0.0404047	1.47809	1.05758	2.0658	0.0221517	0.530391	0.556291	0.554795	297	149	148
AFF2	0.665567	0.482934	0.917265	0.0128591	0.85163	0.60285	1.20308	0.362236	0.561916	0.549669	0.60274	297	157	140
AFF3	1.55598	1.09492	2.21119	0.0136743	1.45322	0.954876	2.21164	0.0810781	0.528667	0.291391	0.842466	297	67	230
AFF4	1.34066	0.866564	2.07414	0.187936	1.34734	0.841296	2.15778	0.214693	0.515196	0.84106	0.232877	297	239	58
AFG3L1P	0.791209	0.57491	1.08889	0.150625	0.877006	0.624337	1.23193	0.449082	0.533249	0.496689	0.60274	297	165	132
AFG3L2	0.571933	0.398251	0.82136	0.00248109	1.08581	0.685006	1.72113	0.726126	0.561236	0.271523	0.869863	297	238	59
AFM	0.726043	0.523485	1.00698	0.0550746	1.04488	0.734919	1.48556	0.806839	0.554046	0.397351	0.746575	297	201	96
AFMID	0.786209	0.56276	1.09838	0.158562	0.891877	0.622881	1.27704	0.532125	0.511725	0.357616	0.719178	297	203	94
AFP	0.546455	0.381421	0.782895	0.00098707	0.893543	0.598218	1.33466	0.582434	0.5694	0.278146	0.883562	297	239	58
AFTPH	0.676086	0.473367	0.965619	0.031371	0.878851	0.586236	1.31752	0.53189	0.530119	0.284768	0.80137	297	226	71
AGA	1.71988	1.13389	2.60872	0.0107375	1.32566	0.85133	2.06427	0.212165	0.567178	0.821192	0.328767	297	222	75
AGAP1	0.658602	0.457423	0.948263	0.0247294	0.80556	0.551046	1.17763	0.264408	0.529484	0.748344	0.383562	297	95	202
AGAP10 /// AGAP11 /// AGAP4 /// AGAP5 /// AGAP9 /// BMS1P5 /// CTGLF12P /// LOC101060581	2.46036	1.64782	3.67356	1.07241e-05	1.99471	1.30501	3.04893	0.00142431	0.616847	0.801325	0.458904	297	200	97
AGAP11	0.479336	0.347913	0.660403	6.87074e-06	0.74309	0.518533	1.06489	0.105776	0.630591	0.490066	0.767123	297	190	107
AGAP11 /// AGAP4 /// AGAP6 /// AGAP7P /// CTGLF12P /// LOC101060581	1.86552	1.33234	2.61206	0.000282611	1.49472	1.04849	2.13085	0.0263046	0.616075	0.655629	0.582192	297	160	137
AGAP2	0.559175	0.406128	0.769896	0.000367126	0.602631	0.431225	0.842169	0.00301766	0.602422	0.503311	0.705479	297	179	118
AGAP2-AS1	0.688766	0.479673	0.989004	0.0433979	0.805825	0.542885	1.19612	0.284033	0.565409	0.741722	0.376712	297	95	202
AGAP3	0.69323	0.503052	0.955305	0.0251273	0.73403	0.518532	1.03909	0.0812041	0.533022	0.463576	0.684932	297	182	115
AGAP4	1.33624	0.970858	1.83913	0.0753221	0.987813	0.709911	1.3745	0.942004	0.530799	0.483444	0.636986	297	126	171
AGAP6	1.22555	0.878277	1.71014	0.231519	1.30032	0.917833	1.84219	0.139528	0.5132	0.642384	0.431507	297	180	117
AGAP6 /// AGAP9 /// BMS1P5	1.39088	0.999643	1.93522	0.0502483	1.29773	0.92296	1.82468	0.133903	0.516352	0.629139	0.486301	297	170	127
AGAP9	1.17422	0.846223	1.62936	0.33658	1.03331	0.731011	1.46062	0.852785	0.531865	0.609272	0.465753	297	170	127
AGBL1	0.746557	0.533506	1.04469	0.0882031	0.835639	0.590744	1.18206	0.310228	0.518915	0.662252	0.431507	297	115	182
AGBL2	1.29355	0.933588	1.7923	0.121876	1.27616	0.913467	1.78286	0.152882	0.518824	0.602649	0.479452	297	167	130
AGBL3	1.57352	1.13301	2.18529	0.00682628	1.58585	1.11245	2.26071	0.0108023	0.561916	0.384106	0.773973	297	91	206
AGBL4	0.530307	0.327447	0.858842	0.00992108	0.618655	0.37059	1.03277	0.0662632	0.530527	0.13245	0.952055	297	271	26
AGBL5	1.47009	1.06801	2.02356	0.0181018	1.68134	1.20329	2.34932	0.00233312	0.547356	0.509934	0.609589	297	134	163
AGER	0.666336	0.439126	1.01111	0.0563842	0.682517	0.440257	1.05809	0.0877182	0.504581	0.18543	0.876712	297	252	45
AGFG1	0.681754	0.490872	0.946863	0.022269	0.993036	0.690426	1.42828	0.969941	0.578064	0.390728	0.760274	297	204	93
AGFG2	0.581113	0.408839	0.82598	0.00248111	0.825433	0.546997	1.2456	0.360803	0.537195	0.298013	0.821918	297	227	70
AGGF1	0.680352	0.49304	0.938827	0.0190695	0.884882	0.61478	1.27365	0.510417	0.541232	0.443709	0.691781	297	186	111
AGK	0.939602	0.681629	1.29521	0.703635	1.13584	0.805792	1.60108	0.467102	0.478862	0.556291	0.493151	297	140	157
AGL	0.628121	0.449564	0.877598	0.0064281	0.71952	0.503193	1.02885	0.071217	0.58455	0.655629	0.5	297	126	171
AGMAT	0.507845	0.366555	0.703595	4.63356e-05	0.616813	0.419648	0.906614	0.0139377	0.577701	0.410596	0.80137	297	207	90
AGO1	1.39266	1.01032	1.91969	0.0431074	1.36622	0.965461	1.93334	0.0781466	0.532704	0.450331	0.671233	297	116	181
AGO2	0.673713	0.488066	0.929976	0.0163343	0.89891	0.629974	1.28266	0.556834	0.575161	0.576159	0.59589	297	152	145
AGO2 /// CASC7 /// CASC7	0.616493	0.442496	0.858907	0.00425116	0.74534	0.520888	1.06651	0.107892	0.567994	0.642384	0.547945	297	135	162
AGO2 /// CASC7 /// CASC7 /// DQ574852	0.510593	0.346885	0.751559	0.000654417	0.679991	0.44316	1.04339	0.0774746	0.567722	0.225166	0.931507	297	254	43
AGO3	2.01896	1.46589	2.78071	1.69566e-05	1.77007	1.25225	2.50202	0.00122119	0.624739	0.523179	0.726027	297	119	178
AGO4	1.51957	1.05822	2.18206	0.0234232	1.38509	0.936347	2.04888	0.102948	0.534746	0.735099	0.363014	297	204	93
AGPAT1	2.26154	1.5539	3.29144	2.02641e-05	1.86611	1.23757	2.81388	0.00290941	0.611131	0.761589	0.479452	297	191	106
AGPAT2	0.522086	0.371009	0.734681	0.000192282	0.738247	0.485286	1.12307	0.156265	0.573256	0.331126	0.856164	297	227	70
AGPAT3	0.766048	0.552908	1.06135	0.109146	0.961425	0.683042	1.35327	0.821561	0.508482	0.609272	0.493151	297	132	165
AGPAT4	2.062	1.49697	2.84031	9.45894e-06	1.96842	1.38653	2.7945	0.000151974	0.599066	0.496689	0.739726	297	113	184
AGPAT4-IT1	1.55865	1.10646	2.19565	0.011129	1.28827	0.896861	1.85051	0.17042	0.596435	0.682119	0.479452	297	179	118
AGPAT5	0.466634	0.327493	0.664892	2.45259e-05	0.601025	0.406178	0.889342	0.0108793	0.612628	0.721854	0.534247	297	121	176
AGPAT6	0.701314	0.509257	0.965802	0.0297738	0.848134	0.606352	1.18633	0.336029	0.547083	0.536424	0.589041	297	157	140
AGPAT9	0.791759	0.573913	1.09229	0.154954	0.943697	0.661301	1.34669	0.749419	0.505761	0.569536	0.506849	297	140	157
AGPS	0.555595	0.39868	0.774268	0.000518815	0.734043	0.516091	1.04404	0.0853983	0.62238	0.642384	0.575342	297	139	158
AGR2	0.586692	0.422199	0.815273	0.00149034	0.666025	0.457497	0.9696	0.0339152	0.579561	0.622517	0.534247	297	136	161
AGR3	0.513514	0.369297	0.71405	7.42309e-05	0.556802	0.383026	0.80942	0.00215718	0.614805	0.622517	0.582192	297	143	154
AGRN	0.799215	0.567371	1.1258	0.1998	1.18256	0.787303	1.77624	0.419186	0.52141	0.688742	0.383562	297	104	193
AGRP	1.3391	0.871752	2.05699	0.182442	1.46453	0.928487	2.31005	0.100827	0.476368	0.165563	0.890411	297	41	256
AGT	1.69233	1.03398	2.76986	0.0363582	0.969787	0.562959	1.67061	0.911966	0.561871	0.880795	0.232877	297	245	52
AGTPBP1	0.643962	0.46768	0.88669	0.00699944	0.636083	0.452504	0.894139	0.0092149	0.556564	0.536424	0.623288	297	162	135
AGTR1	2.19846	1.58335	3.05255	2.54951e-06	2.37346	1.58345	3.55761	2.84377e-05	0.612447	0.390728	0.835616	297	83	214
AGTR2	1.64215	1.16014	2.32444	0.00514492	1.45032	0.985587	2.1342	0.0592534	0.524041	0.304636	0.835616	297	70	227
AGTRAP	0.809571	0.587396	1.11578	0.196828	0.977152	0.689543	1.38472	0.896611	0.541549	0.556291	0.547945	297	148	149
AGXT	0.417535	0.290134	0.60088	2.57095e-06	0.432805	0.291302	0.643043	3.38703e-05	0.584233	0.271523	0.910959	297	244	53
AGXT2	0.721692	0.520338	1.00096	0.0506785	1.09378	0.763109	1.56775	0.625513	0.555883	0.615894	0.506849	297	133	164
AHCTF1	1.06857	0.773626	1.47596	0.687355	1.19338	0.831367	1.71303	0.337771	0.480949	0.576159	0.445205	297	168	129
AHCTF1 /// AHCTF1P1	0.584188	0.424394	0.804148	0.000977742	0.713154	0.499046	1.01912	0.0634578	0.599859	0.509934	0.705479	297	178	119
AHCY	0.848171	0.59818	1.20264	0.355333	0.879608	0.600263	1.28895	0.510547	0.513245	0.304636	0.767123	297	218	79
AHCYL1	0.615923	0.403238	0.940787	0.0249363	0.797769	0.501217	1.26978	0.340706	0.535471	0.178808	0.89726	297	256	41
AHCYL2	0.481394	0.332966	0.695986	0.00010155	0.64304	0.432956	0.955064	0.0286864	0.610043	0.754967	0.458904	297	105	192
AHDC1	1.65225	1.19312	2.28806	0.00250335	1.87106	1.32832	2.63557	0.000338088	0.531843	0.403974	0.753425	297	97	200
AHI1	0.760076	0.547016	1.05612	0.10213	0.874512	0.619459	1.23458	0.445959	0.52082	0.622517	0.479452	297	128	169
AHNAK	1.39227	0.95351	2.03294	0.086624	1.61895	1.07072	2.44788	0.0223786	0.553524	0.231788	0.863014	297	55	242
AHNAK2	2.07379	1.4819	2.90207	2.1e-05	2.56029	1.76252	3.71915	8.01593e-07	0.571623	0.350993	0.835616	297	77	220
AHR	0.6527	0.473357	0.899991	0.00924659	0.600775	0.426995	0.84528	0.0034466	0.544022	0.456954	0.678082	297	182	115
AHRR	1.69818	1.18903	2.42535	0.00359056	1.66267	1.11543	2.47839	0.0125484	0.579425	0.278146	0.876712	297	60	237
AHSA1	0.508856	0.369028	0.701667	3.7681e-05	0.647701	0.452182	0.927761	0.0178395	0.635127	0.556291	0.691781	297	169	128
AHSA2	2.67765	1.68758	4.24857	2.89355e-05	2.31855	1.42561	3.77078	0.000701477	0.59335	0.860927	0.390411	297	219	78
AHSG	0.518268	0.353376	0.760101	0.000768665	0.656128	0.435469	0.988598	0.0439265	0.545496	0.231788	0.890411	297	247	50
AHSP	0.83307	0.603105	1.15072	0.267797	0.607502	0.425743	0.866857	0.00600211	0.509435	0.582781	0.472603	297	133	164
AICDA	0.584751	0.419563	0.814975	0.00153541	0.584318	0.412274	0.828156	0.00253103	0.592126	0.370861	0.80137	297	213	84
AIDA	0.677313	0.48248	0.950823	0.0243636	0.702726	0.488338	1.01123	0.057459	0.531026	0.337748	0.808219	297	219	78
AIF1	1.31118	0.95201	1.80586	0.0971465	0.917437	0.632264	1.33123	0.650062	0.526445	0.463576	0.623288	297	125	172
AIF1L	1.55753	1.13099	2.14492	0.00664993	1.60294	1.14168	2.25055	0.00642479	0.561916	0.529801	0.616438	297	136	161
AIFM1	0.607417	0.439002	0.840442	0.00261947	0.682483	0.459774	1.01307	0.0580214	0.590175	0.417219	0.773973	297	202	95
AIFM2	0.540676	0.371428	0.787045	0.00132725	0.845143	0.528556	1.35135	0.482313	0.548081	0.245033	0.890411	297	245	52
AIFM3	1.32036	0.956935	1.82181	0.0906534	1.40258	0.98049	2.00639	0.0640109	0.531616	0.562914	0.547945	297	151	146
AIG1	1.23782	0.898348	1.70556	0.19206	1.57182	1.09651	2.25315	0.0138379	0.518507	0.456954	0.60274	297	127	170
AIM1	0.472734	0.325967	0.685584	7.80787e-05	0.70594	0.464387	1.07314	0.103178	0.625283	0.761589	0.458904	297	104	193
AIM1L	0.680123	0.480755	0.962169	0.0294174	0.731369	0.489696	1.09231	0.126378	0.546176	0.311258	0.80137	297	222	75
AIM2	0.504966	0.315241	0.808875	0.00447851	0.534183	0.319157	0.894081	0.0170325	0.579833	0.874172	0.287671	297	62	235
AIMP1	0.512957	0.333896	0.788045	0.00230904	0.634951	0.393176	1.0254	0.063255	0.598113	0.84106	0.328767	297	73	224
AIMP2	0.656776	0.47605	0.906114	0.0104552	0.887163	0.606563	1.29757	0.537126	0.566134	0.443709	0.712329	297	189	108
AIP	1.61227	1.16392	2.23333	0.00406579	1.0851	0.759161	1.55098	0.654067	0.566225	0.596026	0.554795	297	155	142
AIPL1	0.75686	0.532592	1.07556	0.120258	0.798432	0.557129	1.14425	0.22018	0.508029	0.298013	0.780822	297	221	76
AIRE	1.10721	0.752532	1.62907	0.605203	1.11505	0.752054	1.65325	0.587865	0.490338	0.218543	0.821918	297	59	238
AJ011981 /// DPY19L1	1.20665	0.867117	1.67914	0.265178	1.22167	0.854295	1.74703	0.272609	0.528509	0.370861	0.691781	297	101	196
AJ420595 /// GOPC	1.67436	1.21601	2.30546	0.00158627	1.19691	0.842671	1.70007	0.315424	0.601334	0.496689	0.69863	297	119	178
AJ606316 /// LOC644135	1.53538	1.09544	2.152	0.0128053	1.40136	0.984365	1.99499	0.061135	0.562869	0.662252	0.486301	297	175	122
AJAP1	1.42484	1.02998	1.97108	0.0324864	1.19621	0.855679	1.67225	0.29458	0.548988	0.589404	0.547945	297	155	142
AJUBA	0.670077	0.481357	0.932787	0.0176811	0.824096	0.552007	1.2303	0.344015	0.554432	0.377483	0.760274	297	206	91
AK000798	1.49213	1.03938	2.14209	0.0300577	1.32716	0.90407	1.94826	0.148435	0.541187	0.735099	0.39726	297	199	98
AK021537	1.50911	1.05951	2.1495	0.022592	1.26482	0.870411	1.83794	0.217919	0.550758	0.284768	0.828767	297	68	229
AK021804	1.99909	1.44775	2.76039	2.58288e-05	1.30984	0.882738	1.94358	0.180084	0.654677	0.569536	0.691781	297	131	166
AK021933	0.764899	0.554407	1.05531	0.102651	0.896307	0.635655	1.26384	0.53236	0.52581	0.443709	0.650685	297	180	117
AK021977	1.75962	1.26551	2.44665	0.000779027	1.29682	0.903739	1.86087	0.158351	0.600426	0.377483	0.828767	297	82	215
AK022030 /// TROVE2	1.39831	1.01394	1.9284	0.040915	1.37458	0.951556	1.98566	0.090009	0.531933	0.443709	0.684932	297	113	184
AK022793 /// BC043213 /// CTB-175P5.4	0.60236	0.413985	0.876452	0.00806912	0.648743	0.433392	0.971101	0.0355144	0.589676	0.768212	0.39726	297	94	203
AK023627 /// TCTE3	1.47946	1.07355	2.03884	0.0166797	1.31296	0.943954	1.82622	0.105801	0.582555	0.543046	0.630137	297	136	161
AK024119 /// CTC-378H22.2	0.646061	0.44418	0.939699	0.0222936	0.769577	0.512036	1.15665	0.207704	0.53842	0.768212	0.349315	297	87	210
AK024134 /// PPM1H	0.455742	0.27832	0.746265	0.00178926	0.447276	0.27072	0.738976	0.00168508	0.541459	0.887417	0.253425	297	55	242
AK024242 /// RP11-758M4.4	0.701255	0.459329	1.0706	0.100189	0.733932	0.47447	1.13528	0.164563	0.527397	0.834437	0.246575	297	62	235
AK024936	1.22333	0.888742	1.68387	0.216286	1.12071	0.801622	1.56681	0.505034	0.523995	0.523179	0.582192	297	140	157
AK025117 /// GPATCH2L	0.912729	0.661826	1.25875	0.577663	1.02492	0.726424	1.44607	0.88854	0.512519	0.562914	0.493151	297	139	158
AK025288	1.65373	1.07644	2.54062	0.021665	1.28155	0.82371	1.99388	0.271329	0.543409	0.834437	0.287671	297	230	67
AK025975 /// RP1-74M1.3	0.716113	0.462867	1.10792	0.133692	0.82163	0.522338	1.29241	0.395281	0.514424	0.847682	0.226027	297	57	240
AK026714 /// PELI1	1.45461	0.97494	2.17027	0.0664102	1.04725	0.682403	1.60715	0.832687	0.541867	0.801325	0.315068	297	221	76
AK026905	1.62821	1.15953	2.28632	0.00488443	1.3051	0.911384	1.8689	0.146092	0.601424	0.668874	0.534247	297	169	128
AK054708 /// RP11-547D24.1	0.636868	0.44998	0.901376	0.0109017	0.74313	0.515216	1.07187	0.112149	0.559557	0.701987	0.431507	297	109	188
AK054988	0.572344	0.385298	0.850193	0.00571369	0.611207	0.400917	0.931799	0.0221209	0.542366	0.211921	0.89726	297	251	46
AK054988 /// TPTE2P1 /// TPTE2P1	1.72635	1.07701	2.76717	0.0233198	1.16019	0.687305	1.95844	0.578055	0.519913	0.13245	0.938356	297	29	268
AK055055 /// RP11-752D24.2	1.24578	0.87256	1.77864	0.226427	1.10323	0.760344	1.60075	0.604943	0.477139	0.278146	0.773973	297	75	222
AK055458	1.28786	0.888526	1.86666	0.181597	1.28803	0.872154	1.90221	0.203249	0.498322	0.245033	0.808219	297	65	232
AK055910 /// ZBTB1	1.46426	1.03518	2.0712	0.0311333	1.06204	0.724826	1.55613	0.757469	0.551211	0.695364	0.431507	297	188	109
AK055981	0.713611	0.516245	0.986433	0.0410863	0.699824	0.492654	0.994113	0.046269	0.545088	0.589404	0.541096	297	142	155
AK055981 /// RP11-617F23.1	0.785863	0.558837	1.10512	0.165948	0.738379	0.510924	1.0671	0.106459	0.527261	0.682119	0.40411	297	108	189
AK056098	1.47442	1.07119	2.02942	0.0172255	1.52758	1.08739	2.14598	0.0145644	0.542774	0.496689	0.630137	297	129	168
AK056982	1.36017	0.983168	1.88173	0.0632455	1.35001	0.967313	1.88412	0.0776368	0.522272	0.589404	0.506849	297	161	136
AK057259 /// AK096803	0.650419	0.472481	0.895369	0.00834729	0.707613	0.498051	1.00535	0.0535838	0.553071	0.523179	0.616438	297	163	134
AK057554 /// RP11-144L1.4	0.805033	0.58451	1.10875	0.184224	0.867354	0.617693	1.21792	0.411268	0.513064	0.536424	0.541096	297	150	147
AK057657 /// RP11-473I1.9	1.48686	1.07716	2.05239	0.0158682	1.27977	0.891918	1.83628	0.18055	0.570466	0.430464	0.705479	297	108	189
AK057978 /// MKLN1	1.58406	1.12637	2.22773	0.00819466	1.52162	1.05126	2.20242	0.0260878	0.584006	0.675497	0.479452	297	178	119
AK074476	0.795267	0.524389	1.20607	0.280972	1.07456	0.686089	1.68298	0.75342	0.486664	0.18543	0.863014	297	250	47
AK090844	1.81099	1.30558	2.51205	0.000374996	1.28782	0.898241	1.84637	0.16878	0.626735	0.609272	0.616438	297	148	149
AK091028 /// GMDS-AS1	1.19235	0.86511	1.64338	0.282483	1.16152	0.827298	1.63076	0.387117	0.508074	0.549669	0.527397	297	152	145
AK091729	1.60962	1.1659	2.22222	0.00381839	1.29194	0.926528	1.80148	0.131022	0.570761	0.569536	0.582192	297	147	150
AK093205	1.58169	1.09506	2.28457	0.0145233	1.81005	1.22337	2.67807	0.00299124	0.54545	0.748344	0.390411	297	202	95
AK093256 /// RP3-486I3.7	0.771065	0.555443	1.07039	0.120307	0.755946	0.54023	1.0578	0.102644	0.530504	0.622517	0.472603	297	127	170
AK093301 /// RP11-862G15.1	1.21782	0.884006	1.67769	0.227951	1.14289	0.822114	1.58883	0.426839	0.515468	0.543046	0.520548	297	152	145
AK093356 /// RP11-10L12.4	0.792068	0.5748	1.09146	0.154163	0.878273	0.622701	1.23874	0.459439	0.487708	0.463576	0.616438	297	172	125
AK093362 /// RP11-774D14.1	0.705507	0.511787	0.972554	0.0331814	0.732198	0.523937	1.02324	0.0679382	0.553819	0.556291	0.575342	297	152	145
AK093370 /// CTD-3046C4.1	0.692158	0.49614	0.965619	0.0303179	0.926839	0.64685	1.32802	0.678856	0.552277	0.649007	0.472603	297	123	174
AK094644	1.46939	1.06126	2.03447	0.0204426	1.32789	0.941784	1.87229	0.105706	0.537422	0.403974	0.719178	297	102	195
AK094733 /// RP11-114G22.1	0.729201	0.521119	1.02037	0.0654276	0.683862	0.47986	0.974592	0.0355224	0.547945	0.662252	0.445205	297	117	180
AK096159	1.37258	0.979456	1.92349	0.0658569	1.36085	0.953976	1.94127	0.0891309	0.549714	0.662252	0.452055	297	180	117
AK096335 /// AP000662.4	0.852103	0.619053	1.17289	0.326222	0.884718	0.632662	1.23719	0.474043	0.466865	0.529801	0.520548	297	148	149
AK096592 /// YLPM1	1.75818	1.27391	2.42654	0.000597606	1.41741	1.00795	1.9932	0.0449096	0.616869	0.562914	0.643836	297	137	160
AK096803 /// RP11-395B7.2	2.57629	0.953868	6.95826	0.06193	1.94691	0.707081	5.36069	0.197315	0.512973	0.97351	0.0890411	297	280	17
AK097119 /// RP11-73M18.6	1.49957	1.01896	2.20687	0.0398561	1.31867	0.863954	2.01272	0.199785	0.516284	0.218543	0.876712	297	51	246
AK097242 /// CTB-127C13.1	0.893075	0.648063	1.23072	0.48947	1.23345	0.879158	1.73053	0.224563	0.51701	0.556291	0.506849	297	142	155
AK097370	0.687267	0.496444	0.951438	0.0238247	0.711968	0.506506	1.00077	0.0505228	0.515558	0.410596	0.719178	297	195	102
AK097453	0.723932	0.470932	1.11285	0.140866	0.752828	0.47311	1.19792	0.230926	0.515967	0.172185	0.890411	297	256	41
AK097836 /// RP5-971N18.3	0.724092	0.474331	1.10537	0.134703	0.921982	0.58345	1.45694	0.727883	0.52429	0.178808	0.890411	297	255	42
AK098263	0.660076	0.44236	0.984946	0.0419267	0.540499	0.356898	0.81855	0.00366699	0.546448	0.807947	0.308219	297	75	222
AK1	0.611923	0.395442	0.946916	0.0274666	0.720534	0.458987	1.13112	0.154306	0.535743	0.847682	0.260274	297	62	235
AK123826 /// RP11-510M2.2	0.715527	0.518058	0.988264	0.0421926	0.777259	0.549165	1.10009	0.155104	0.540846	0.582781	0.541096	297	143	154
AK125860 /// RP11-582J16.4	0.563967	0.394864	0.805489	0.00163652	0.83169	0.549022	1.25989	0.384454	0.541232	0.291391	0.869863	297	236	61
AK126278 /// CUL4A	1.41077	1.02436	1.94292	0.0350853	1.24008	0.885877	1.73589	0.209898	0.566044	0.463576	0.657534	297	120	177
AK128734 /// JAK1	9.22356	1.29048	65.9244	0.026822	8.20999	1.13956	59.1493	0.0366513	0.52107	0.993377	0.0821918	297	284	13
AK130486	1.31354	0.954453	1.80772	0.09416	1.22581	0.86984	1.72746	0.244725	0.526263	0.496689	0.609589	297	132	165
AK131021	0.562425	0.404065	0.782849	0.000647268	0.684523	0.481495	0.973161	0.0347273	0.626826	0.635762	0.568493	297	139	158
AK2	0.478051	0.34509	0.662241	9.06347e-06	0.576306	0.396044	0.838615	0.00398205	0.615078	0.417219	0.80137	297	206	91
AK291611 /// TRGV7 /// TRGV7	0.62138	0.45107	0.855994	0.0035983	0.692558	0.495473	0.968038	0.0315483	0.565386	0.470199	0.691781	297	182	115
AK3	0.504439	0.325981	0.780593	0.00212691	0.551509	0.351026	0.866495	0.00983388	0.577021	0.847682	0.308219	297	69	228
AK311120 /// LSAMP	0.660323	0.473902	0.920077	0.0142019	0.833415	0.583423	1.19053	0.316587	0.571237	0.370861	0.760274	297	207	90
AK4 /// LOC100507855	1.53922	1.09991	2.154	0.0118906	1.48853	1.03236	2.14629	0.0331288	0.555611	0.344371	0.767123	297	86	211
AK5	1.55286	1.12477	2.14389	0.00748506	1.79052	1.26305	2.53828	0.00106963	0.56364	0.430464	0.712329	297	107	190
AK6	0.767045	0.519102	1.13342	0.18309	0.989466	0.635139	1.54146	0.962658	0.524358	0.794702	0.287671	297	74	223
AK6 /// TAF9	0.656775	0.453192	0.951812	0.0263607	0.981837	0.63582	1.51616	0.934105	0.572258	0.761589	0.390411	297	94	203
AK7	0.580586	0.399036	0.844737	0.00448499	0.736604	0.487958	1.11195	0.145689	0.597251	0.768212	0.40411	297	95	202
AK8	0.769307	0.552747	1.07071	0.119972	0.88674	0.616308	1.27584	0.517254	0.536424	0.635762	0.465753	297	124	173
AK9	1.14174	0.813398	1.60262	0.443577	1.49492	1.03929	2.15029	0.0301778	0.498821	0.668874	0.369863	297	193	104
AKAP1	0.690762	0.502012	0.950481	0.0230965	0.823646	0.581662	1.1663	0.274316	0.545587	0.496689	0.630137	297	169	128
AKAP10	1.86327	1.31131	2.64755	0.000516459	1.58811	1.09219	2.30922	0.0154506	0.60528	0.708609	0.5	297	180	117
AKAP11	1.86145	1.3352	2.59511	0.000247192	1.45529	1.00712	2.10289	0.0457452	0.591717	0.635762	0.575342	297	158	139
AKAP12	2.43859	1.6756	3.54902	3.22457e-06	1.81334	1.19417	2.75353	0.00522904	0.673501	0.761589	0.513699	297	186	111
AKAP13	1.61622	1.1347	2.30209	0.00781084	1.46762	0.999985	2.15394	0.050009	0.560192	0.715232	0.458904	297	187	110
AKAP14	0.515824	0.372093	0.715074	7.1147e-05	0.657639	0.457042	0.946278	0.023984	0.612084	0.609272	0.623288	297	151	146
AKAP17A	1.16755	0.847199	1.60903	0.343825	1.12414	0.797049	1.58546	0.504775	0.511567	0.450331	0.609589	297	125	172
AKAP2 /// PALM2-AKAP2	1.98323	1.43586	2.73926	3.24662e-05	1.08884	0.706956	1.67701	0.699318	0.631407	0.430464	0.780822	297	97	200
AKAP2 /// PALM2 /// PALM2-AKAP2	0.827375	0.597199	1.14627	0.254595	0.860575	0.613235	1.20768	0.385116	0.534088	0.403974	0.678082	297	190	107
AKAP3	1.54764	1.05617	2.26778	0.0250699	1.64601	1.09513	2.47398	0.0165262	0.510614	0.774834	0.349315	297	212	85
AKAP4	0.752098	0.545669	1.03662	0.0818111	0.713537	0.506363	1.00547	0.0537598	0.547174	0.456954	0.657534	297	179	118
AKAP5	0.474595	0.299159	0.75291	0.00154907	0.456611	0.275642	0.756391	0.00233345	0.587408	0.86755	0.30137	297	65	232
AKAP6	1.36688	0.971999	1.92219	0.0723839	1.11696	0.780884	1.59766	0.544744	0.557652	0.675497	0.438356	297	184	113
AKAP7	0.412359	0.217011	0.783555	0.00683718	0.462884	0.237208	0.903265	0.0239311	0.536877	0.940397	0.178082	297	36	261
AKAP8	0.6199	0.450379	0.853229	0.00334875	0.719414	0.507742	1.01933	0.0639867	0.589585	0.523179	0.671233	297	171	126
AKAP8L	1.291	0.910738	1.83003	0.151359	1.14204	0.791158	1.64854	0.478228	0.499592	0.298013	0.767123	297	79	218
AKAP9	1.89941	1.29607	2.78361	0.00100249	1.54508	1.03229	2.3126	0.0344816	0.583734	0.774834	0.410959	297	203	94
AKIP1	0.784676	0.535559	1.14967	0.213399	0.966234	0.631458	1.4785	0.874246	0.534519	0.781457	0.294521	297	77	220
AKIP1 /// NUAK2	0.522595	0.370694	0.736742	0.000212591	0.566762	0.391573	0.820331	0.00261491	0.583825	0.324503	0.849315	297	227	70
AKIRIN1	1.52432	0.967589	2.40138	0.0690824	2.50204	1.52972	4.09239	0.000258914	0.500953	0.145695	0.917808	297	34	263
AKIRIN2	0.701859	0.493942	0.997295	0.0482597	0.761882	0.523388	1.10905	0.155706	0.552527	0.715232	0.431507	297	107	190
AKNA	0.601996	0.396608	0.913748	0.0171437	0.525628	0.339029	0.814928	0.00404417	0.521863	0.18543	0.89726	297	255	42
AKNAD1	1.28561	0.931843	1.77368	0.126004	1.0357	0.742562	1.44456	0.836305	0.511703	0.437086	0.671233	297	114	183
AKR1A1	0.585833	0.425451	0.806673	0.00105179	0.608707	0.424335	0.873187	0.00700553	0.586728	0.490066	0.671233	297	176	121
AKR1B1	1.64298	1.16382	2.3194	0.00476729	1.04674	0.696123	1.57395	0.826271	0.562007	0.688742	0.465753	297	182	115
AKR1B10	0.790247	0.563897	1.10745	0.171563	0.821099	0.555607	1.21346	0.322607	0.509117	0.344371	0.719178	297	205	92
AKR1C1	1.34168	0.973534	1.84904	0.0724851	1.27202	0.887706	1.82272	0.189871	0.543591	0.549669	0.568493	297	146	151
AKR1C1 /// AKR1C2 /// LOC101930400	1.25554	0.909581	1.73309	0.166448	1.10724	0.781212	1.56932	0.567017	0.534065	0.569536	0.534247	297	154	143
AKR1C2 /// LOC101930400	1.22514	0.850749	1.76429	0.275153	1.21214	0.808817	1.81657	0.351325	0.524494	0.741722	0.342466	297	208	89
AKR1C3	0.717837	0.483361	1.06606	0.100394	0.892668	0.568111	1.40264	0.622404	0.5132	0.211921	0.849315	297	244	53
AKR1C4	0.665485	0.482979	0.916955	0.0127716	0.665463	0.449546	0.985086	0.0418464	0.565499	0.549669	0.59589	297	156	141
AKR1C6P	0.655596	0.475591	0.90373	0.00993589	0.885111	0.631588	1.2404	0.478459	0.576613	0.556291	0.59589	297	155	142
AKR1D1	0.520835	0.336077	0.807165	0.00351853	0.662467	0.418393	1.04892	0.0790458	0.545269	0.165563	0.945205	297	265	32
AKR1E2	0.942079	0.683337	1.29879	0.71571	1.1522	0.817289	1.62435	0.418794	0.493332	0.562914	0.493151	297	139	158
AKR7A2	0.563221	0.407956	0.777579	0.000485214	0.701731	0.492748	0.999348	0.0495787	0.576476	0.569536	0.609589	297	155	142
AKR7A3	0.562476	0.39347	0.804074	0.00159946	0.598893	0.404503	0.8867	0.0104508	0.561326	0.728477	0.417808	297	103	194
AKT1	1.13057	0.757913	1.68647	0.547526	1.24611	0.814424	1.90661	0.310596	0.508119	0.198675	0.849315	297	52	245
AKT1S1	0.559437	0.401304	0.779881	0.000610899	0.641633	0.451769	0.911292	0.013179	0.591672	0.370861	0.815068	297	215	82
AKT2	1.25127	0.908655	1.72307	0.1697	1.19948	0.84159	1.70955	0.314397	0.547446	0.463576	0.636986	297	123	174
AKT3	2.20463	1.49814	3.24429	6.05504e-05	1.71929	1.11918	2.64118	0.0133612	0.651184	0.781457	0.465753	297	196	101
AKTIP	2.29248	1.57053	3.34631	1.71425e-05	2.53336	1.63864	3.9166	2.89323e-05	0.565	0.238411	0.931507	297	46	251
AL022341.3	0.831685	0.604245	1.14473	0.258188	0.860215	0.611208	1.21067	0.38783	0.515241	0.523179	0.541096	297	152	145
AL022344.5	1.37621	1.00016	1.89367	0.0498887	1.19241	0.854997	1.66297	0.299785	0.534564	0.503311	0.630137	297	130	167
AL109706	0.655029	0.47585	0.901678	0.00946686	0.83478	0.591887	1.17735	0.303317	0.533884	0.529801	0.623288	297	163	134
AL110181 /// RP11-390E23.6	0.726055	0.527028	1.00024	0.0501747	0.852291	0.610347	1.19014	0.348157	0.514651	0.463576	0.643836	297	176	121
AL132709.8	1.85735	1.31296	2.62747	0.000467943	1.47636	1.008	2.16233	0.0454025	0.592783	0.304636	0.869863	297	65	232
AL133493.2	0.882054	0.640335	1.21502	0.442452	0.804373	0.577108	1.12113	0.198784	0.495532	0.470199	0.589041	297	167	130
AL590762.11	0.668584	0.485401	0.920897	0.0137241	0.825462	0.572277	1.19066	0.304761	0.595187	0.470199	0.705479	297	184	113
AL831948 /// RP1-197B17.3	0.71265	0.494897	1.02621	0.0686258	0.807532	0.557476	1.16975	0.258191	0.53656	0.748344	0.363014	297	92	205
AL832163	1.98857	1.41791	2.78889	6.79314e-05	1.73237	1.19281	2.51601	0.00390203	0.570761	0.337748	0.842466	297	74	223
AL832615 /// AX747639	1.3794	0.992316	1.91749	0.055612	1.27305	0.898094	1.80454	0.175044	0.514583	0.377483	0.705479	297	100	197
AL832909 /// LINC00984	1.86505	1.35437	2.5683	0.000134473	1.83753	1.25123	2.69857	0.00191548	0.622335	0.476821	0.732877	297	111	186
AL832909 /// LINC00984 /// LINC00984 /// LINC00984	1.80108	1.30853	2.47904	0.000306628	1.38369	0.95871	1.99705	0.0827896	0.637803	0.496689	0.719178	297	116	181
AL833181	1.57995	1.13083	2.20744	0.00735142	1.43616	1.00406	2.05422	0.0474637	0.559285	0.649007	0.506849	297	170	127
AL928742.12	0.619351	0.449525	0.853335	0.00339034	0.699583	0.497976	0.98281	0.0394042	0.592851	0.470199	0.705479	297	184	113
AL928768.3 /// Ig alpha 1-[alpha]2m /// IGH	1.81686	1.17318	2.81371	0.00745802	1.69655	1.03505	2.78083	0.0360289	0.52903	0.15894	0.945205	297	32	265
ALAD	0.854118	0.620023	1.1766	0.334612	1.15045	0.814796	1.62439	0.42586	0.486301	0.549669	0.5	297	142	155
ALAS1	0.389924	0.280611	0.54182	2.01235e-08	0.50026	0.337245	0.742074	0.000575957	0.613807	0.397351	0.869863	297	219	78
ALAS2	0.706462	0.506262	0.985831	0.0409632	0.759601	0.536981	1.07451	0.120224	0.565182	0.649007	0.465753	297	122	175
ALB	1.49282	1.08473	2.05443	0.0139257	1.61396	1.15187	2.26143	0.00541049	0.535426	0.509934	0.616438	297	133	164
ALCAM	1.66505	1.17699	2.3555	0.00396772	1.51717	1.05526	2.18127	0.0244294	0.569083	0.695364	0.486301	297	180	117
ALDH16A1	0.523138	0.377305	0.725337	0.000101946	0.505854	0.356224	0.718335	0.000139597	0.618616	0.609272	0.616438	297	150	147
ALDH18A1	0.477119	0.31635	0.71959	0.000416254	0.658428	0.426099	1.01743	0.0598198	0.607366	0.821192	0.376712	297	83	214
ALDH1A1	0.768963	0.53064	1.11432	0.165126	0.849076	0.573075	1.258	0.414694	0.515694	0.761589	0.308219	297	82	215
ALDH1A2	0.629866	0.451219	0.879242	0.0066041	0.710867	0.49347	1.02404	0.0668892	0.537717	0.364238	0.773973	297	210	87
ALDH1A2 /// LOC101928635	1.51897	1.10314	2.09156	0.0104252	1.31402	0.923898	1.86887	0.128627	0.556564	0.523179	0.609589	297	136	161
ALDH1A3	1.68264	1.22045	2.31988	0.00149428	1.07457	0.726439	1.58953	0.718828	0.599383	0.450331	0.732877	297	107	190
ALDH1B1	1.87949	1.25224	2.82093	0.00232166	1.95359	1.21857	3.13196	0.00542216	0.517463	0.192053	0.917808	297	41	256
ALDH1L1	1.22382	0.889223	1.68432	0.21517	1.66738	1.19448	2.32751	0.00266234	0.504672	0.516556	0.541096	297	145	152
ALDH1L1-AS2	0.731461	0.52558	1.01799	0.0637059	0.684317	0.478369	0.97893	0.0378446	0.541935	0.635762	0.486301	297	127	170
ALDH1L2	1.33567	0.967068	1.84477	0.0789656	0.983177	0.685676	1.40976	0.926484	0.508573	0.423841	0.684932	297	110	187
ALDH2	0.725528	0.509459	1.03323	0.0752861	1.05861	0.713475	1.57069	0.777241	0.547356	0.721854	0.383562	297	99	198
ALDH3A1	1.24035	0.900404	1.70864	0.187504	1.33713	0.944794	1.89237	0.101111	0.538737	0.543046	0.561644	297	146	151
ALDH3A2	0.675163	0.471471	0.966855	0.0320378	0.952573	0.633317	1.43277	0.815529	0.531979	0.735099	0.376712	297	96	201
ALDH3B1	0.725444	0.481095	1.0939	0.125601	0.844637	0.542111	1.31599	0.455485	0.518643	0.821192	0.246575	297	64	233
ALDH3B2	0.823304	0.587491	1.15377	0.258801	0.927739	0.644747	1.33494	0.686224	0.496054	0.344371	0.732877	297	207	90
ALDH4A1	1.15909	0.821246	1.6359	0.401039	1.09115	0.736158	1.61733	0.663966	0.485621	0.311258	0.753425	297	83	214
ALDH5A1	0.523839	0.214779	1.27763	0.155211	0.419823	0.165093	1.06759	0.0683612	0.496326	0.97351	0.0753425	297	16	281
ALDH6A1	0.723995	0.525781	0.996933	0.0478402	0.965598	0.685721	1.35971	0.841118	0.522181	0.536424	0.575342	297	155	142
ALDH7A1	1.35678	0.855614	2.15148	0.194609	1.36366	0.844808	2.20117	0.204214	0.504536	0.860927	0.19863	297	247	50
ALDH8A1	1.41616	1.02529	1.95605	0.0347262	1.25647	0.883576	1.78674	0.203755	0.570806	0.423841	0.705479	297	107	190
ALDH9A1	0.831493	0.569743	1.2135	0.338708	0.96114	0.639107	1.44544	0.849011	0.505216	0.774834	0.280822	297	76	221
ALDOA	0.635806	0.461953	0.875088	0.00545819	0.926528	0.647447	1.3259	0.676449	0.56813	0.496689	0.671233	297	175	122
ALDOAP2	1.36465	0.990195	1.88072	0.057465	1.09355	0.776245	1.54055	0.609048	0.542003	0.450331	0.671233	297	116	181
ALDOB	0.571415	0.411471	0.793531	0.000836903	0.550961	0.380279	0.79825	0.00162621	0.593985	0.622517	0.568493	297	141	156
ALDOC	0.74408	0.496285	1.1156	0.152554	0.671837	0.432758	1.043	0.0763333	0.503901	0.198675	0.876712	297	250	47
ALG1	0.676318	0.475939	0.961061	0.0291458	0.714059	0.489139	1.0424	0.0810181	0.555883	0.715232	0.40411	297	103	194
ALG1 /// NAGPA-AS1	0.752139	0.543723	1.04044	0.0853439	0.729575	0.52059	1.02245	0.0670996	0.539372	0.596026	0.493151	297	134	163
ALG10	0.573029	0.415585	0.79012	0.000680784	0.726674	0.510947	1.03348	0.0756185	0.619296	0.556291	0.657534	297	164	133
ALG10 /// ALG10B	1.25497	0.909603	1.73147	0.166665	1.35519	0.960874	1.91133	0.0831906	0.505761	0.562914	0.513699	297	156	141
ALG11 /// UTP14A /// UTP14C	0.89316	0.639376	1.24768	0.507649	0.942085	0.653737	1.35762	0.748958	0.521727	0.655629	0.417808	297	114	183
ALG11 /// UTP14C	1.40456	0.969001	2.0359	0.0728605	1.42007	0.953032	2.11597	0.0847908	0.531253	0.754967	0.356164	297	208	89
ALG12	0.602448	0.422914	0.858197	0.00500003	0.669382	0.45238	0.990476	0.0446612	0.541776	0.291391	0.842466	297	231	66
ALG13	0.782443	0.564736	1.08408	0.140291	0.695752	0.481987	1.00432	0.0527534	0.490338	0.403974	0.671233	297	189	108
ALG14	0.60911	0.440923	0.841451	0.00263793	0.752243	0.520506	1.08715	0.129714	0.593622	0.582781	0.582192	297	149	148
ALG2	0.715551	0.510542	1.00288	0.0519854	0.820091	0.568602	1.18281	0.288487	0.537014	0.344371	0.760274	297	211	86
ALG3	0.495584	0.346818	0.708163	0.000115815	0.676457	0.461645	0.991225	0.0449441	0.53656	0.284768	0.89726	297	240	57
ALG5	0.579136	0.418534	0.801367	0.000979755	0.687994	0.472724	1.00129	0.0507947	0.569763	0.417219	0.753425	297	199	98
ALG6	0.607104	0.438111	0.841284	0.00271495	0.76388	0.530465	1.1	0.147706	0.58895	0.609272	0.568493	297	143	154
ALG8	0.468735	0.310245	0.708191	0.000319801	0.510315	0.318739	0.817039	0.0050875	0.530935	0.192053	0.952055	297	262	35
ALG9	1.17499	0.825002	1.67344	0.37145	0.919542	0.635049	1.33149	0.65696	0.523224	0.715232	0.356164	297	202	95
ALK	0.79431	0.562607	1.12144	0.190655	1.04699	0.715149	1.53282	0.813338	0.516375	0.695364	0.376712	297	102	195
ALKBH1	0.636455	0.459678	0.881215	0.00649563	0.826801	0.584013	1.17052	0.283597	0.574118	0.602649	0.575342	297	145	152
ALKBH2	0.778838	0.565902	1.0719	0.125057	0.866658	0.606634	1.23814	0.431685	0.534201	0.490066	0.60274	297	166	131
ALKBH3	2.05452	1.33679	3.15762	0.00102449	2.06484	1.32683	3.21334	0.00131251	0.561825	0.834437	0.349315	297	221	76
ALKBH3-AS1	0.556612	0.378052	0.81951	0.0029929	0.699269	0.454425	1.07603	0.103798	0.522453	0.225166	0.883562	297	247	50
ALKBH4	0.729881	0.530364	1.00445	0.0532749	0.94046	0.669036	1.322	0.723852	0.544362	0.516556	0.60274	297	162	135
ALKBH5	0.814758	0.441006	1.50527	0.513029	0.82321	0.434759	1.55874	0.550336	0.475052	0.0794702	0.945205	297	278	19
ALKBH6	0.729265	0.529753	1.00391	0.0528666	0.820179	0.576385	1.16709	0.270704	0.535562	0.483444	0.643836	297	173	124
ALKBH7	1.00734	0.710644	1.4279	0.967241	0.902263	0.618234	1.31678	0.593878	0.497006	0.298013	0.739726	297	83	214
ALKBH8	0.780068	0.566811	1.07356	0.127426	0.93243	0.656505	1.32433	0.695939	0.548626	0.523179	0.59589	297	160	137
ALLC	0.684864	0.486858	0.963399	0.0296956	0.747676	0.51978	1.07549	0.116971	0.531661	0.331126	0.780822	297	216	81
ALMS1	0.864894	0.618198	1.21004	0.396888	0.90078	0.633002	1.28184	0.561554	0.492879	0.350993	0.712329	297	203	94
ALMS1-IT1	0.778214	0.559159	1.08309	0.137084	0.772685	0.544384	1.09673	0.148954	0.542729	0.635762	0.479452	297	126	171
ALMS1P	0.820564	0.571602	1.17796	0.283686	0.977685	0.670471	1.42567	0.906651	0.512519	0.741722	0.328767	297	88	209
ALOX12	0.736779	0.530085	1.02407	0.0690057	0.897784	0.623521	1.29269	0.562107	0.515513	0.384106	0.726027	297	200	97
ALOX12B	1.52837	1.07782	2.16724	0.0172879	1.56687	1.08997	2.25244	0.0153003	0.539848	0.298013	0.815068	297	72	225
ALOX12P2	1.27497	0.888073	1.83042	0.187969	1.22906	0.837058	1.80465	0.292612	0.502903	0.264901	0.808219	297	68	229
ALOX15	0.759234	0.543307	1.06097	0.10668	0.707259	0.500778	0.998876	0.0492582	0.508981	0.357616	0.705479	297	201	96
ALOX15B	0.662141	0.478261	0.916718	0.0129973	0.604934	0.428938	0.853144	0.00416487	0.568947	0.602649	0.554795	297	142	155
ALOX5	0.793097	0.575521	1.09293	0.156529	0.698495	0.500644	0.974536	0.0347063	0.527488	0.456954	0.650685	297	178	119
ALOX5AP	0.761447	0.5531	1.04828	0.0947397	0.740178	0.523397	1.04675	0.0888336	0.537966	0.516556	0.609589	297	163	134
ALOXE3	0.848357	0.60187	1.19579	0.347728	1.03132	0.718152	1.48105	0.867363	0.51388	0.324503	0.732877	297	210	87
ALPI	0.626002	0.433285	0.904438	0.0125966	0.526105	0.354651	0.780447	0.00141317	0.536288	0.258278	0.863014	297	239	58
ALPK1	0.652727	0.458134	0.929973	0.0181803	0.730593	0.505744	1.05541	0.0944027	0.556155	0.291391	0.821918	297	228	69
ALPK2	1.50197	1.0793	2.09016	0.0158393	1.34221	0.904108	1.99262	0.144309	0.536061	0.370861	0.773973	297	89	208
ALPK3	2.50864	1.81514	3.4671	2.53255e-08	2.18434	1.49153	3.19895	5.9726e-05	0.634718	0.437086	0.835616	297	90	207
ALPL	0.637071	0.459812	0.882664	0.00672424	0.680214	0.483898	0.956174	0.0265615	0.586365	0.602649	0.534247	297	139	158
ALPP	0.754474	0.50024	1.13792	0.179033	0.657667	0.424671	1.0185	0.0604043	0.523179	0.821192	0.260274	297	66	231
ALPP /// ALPPL2	0.528204	0.360195	0.774579	0.0010843	0.59132	0.389887	0.896822	0.0134203	0.549397	0.231788	0.90411	297	249	48
ALPPL2	0.61658	0.435805	0.872341	0.00630666	0.594315	0.4034	0.875582	0.00848747	0.544135	0.311258	0.80137	297	222	75
ALS2	0.556766	0.404237	0.766848	0.000336836	0.734099	0.521687	1.033	0.0761145	0.604554	0.523179	0.69863	297	175	122
ALS2CL	0.805273	0.58501	1.10847	0.184064	1.07429	0.750438	1.53789	0.695441	0.532069	0.503311	0.575342	297	160	137
ALS2CR11	1.3274	0.964293	1.82724	0.0823919	1.13986	0.804986	1.61403	0.460754	0.545224	0.523179	0.60274	297	137	160
ALS2CR12	0.628027	0.451664	0.873257	0.00567916	0.623525	0.444572	0.874512	0.00620272	0.603919	0.384106	0.787671	297	209	88
ALX1	1.20612	0.876142	1.66037	0.25049	1.15803	0.820532	1.63435	0.403894	0.489431	0.470199	0.589041	297	131	166
ALX3	0.639615	0.444155	0.921093	0.0163191	0.733524	0.500046	1.07602	0.112923	0.533067	0.264901	0.835616	297	234	63
ALX4	0.815996	0.592852	1.12313	0.212191	0.724276	0.51796	1.01277	0.0593256	0.509276	0.516556	0.554795	297	155	142
ALYREF	0.634963	0.458882	0.87861	0.00612603	0.765219	0.531913	1.10086	0.149268	0.606187	0.596026	0.59589	297	149	148
AMACR	0.701388	0.508658	0.967143	0.0304819	0.943703	0.660379	1.34858	0.750393	0.526127	0.450331	0.650685	297	179	118
AMACR /// C1QTNF3-AMACR	0.688947	0.362699	1.30866	0.255034	0.87278	0.445374	1.71035	0.691798	0.492652	0.940397	0.10274	297	25	272
AMBN	0.606179	0.413637	0.888346	0.0102547	0.664316	0.445457	0.990702	0.0448804	0.556065	0.781457	0.356164	297	86	211
AMBP	0.512088	0.349062	0.751253	0.000620109	0.742297	0.463983	1.18755	0.213874	0.550667	0.231788	0.910959	297	250	47
AMBRA1	0.59673	0.432669	0.822999	0.00164637	0.688537	0.484559	0.978381	0.0373524	0.570625	0.562914	0.643836	297	161	136
AMD1	0.536479	0.389118	0.739648	0.000144391	0.716825	0.486344	1.05653	0.092546	0.602785	0.549669	0.671233	297	167	130
AMDHD1	2.0363	1.47676	2.80784	1.43638e-05	1.49373	1.05439	2.11613	0.0239476	0.620566	0.463576	0.767123	297	104	193
AMDHD2 /// CEMP1	0.783902	0.569422	1.07917	0.135487	0.726522	0.520881	1.01335	0.0598561	0.549669	0.529801	0.582192	297	157	140
AMELX	0.600209	0.41117	0.876161	0.00816991	0.635104	0.428631	0.941037	0.0236418	0.58294	0.774834	0.369863	297	89	208
AMELY	0.767916	0.554133	1.06418	0.112668	0.719037	0.504113	1.02559	0.0686847	0.536424	0.609272	0.479452	297	130	167
AMER1	0.591282	0.428748	0.81543	0.0013546	0.571517	0.405274	0.805954	0.00142247	0.597614	0.450331	0.732877	297	191	106
AMER2	1.38432	0.912825	2.09935	0.125853	0.903958	0.56424	1.44821	0.674555	0.517826	0.178808	0.890411	297	43	254
AMER3	0.596552	0.431143	0.825421	0.0018209	0.603443	0.42683	0.853134	0.00424929	0.579788	0.596026	0.589041	297	148	149
AMFR	0.729438	0.525388	1.01274	0.0595145	0.839702	0.588541	1.19805	0.335309	0.517282	0.390728	0.705479	297	196	101
AMH /// MIR4321	0.767427	0.552781	1.06542	0.113788	0.830139	0.584899	1.17821	0.2974	0.538964	0.390728	0.719178	297	198	99
AMHR2	0.776287	0.53381	1.12891	0.18505	0.751163	0.507688	1.1114	0.152278	0.498889	0.245033	0.808219	297	233	64
AMICA1	1.20813	0.877969	1.66246	0.245682	0.790931	0.54377	1.15044	0.219863	0.509888	0.509934	0.561644	297	141	156
AMIGO1	1.73974	1.24466	2.43175	0.00119133	1.67395	1.15079	2.43494	0.00704883	0.6085	0.649007	0.547945	297	164	133
AMIGO2	1.95949	1.38185	2.77859	0.000160039	1.52023	1.03369	2.23577	0.03331	0.596888	0.701987	0.5	297	179	118
AMIGO3 /// GMPPB	0.574848	0.415881	0.794579	0.000801686	0.624821	0.4343	0.898922	0.0112717	0.575705	0.430464	0.739726	297	195	102
AMMECR1	0.657402	0.459221	0.94111	0.0219317	0.873948	0.594092	1.28564	0.493878	0.572485	0.735099	0.417808	297	102	195
AMMECR1L	1.74765	1.26388	2.4166	0.000734794	2.1066	1.47988	2.99873	3.54085e-05	0.572893	0.582781	0.589041	297	148	149
AMN	0.717704	0.515931	0.998389	0.0488913	0.834395	0.568884	1.22382	0.354224	0.552527	0.629139	0.486301	297	128	169
AMN1	1.53021	1.1031	2.12271	0.0108477	1.42549	0.989769	2.05301	0.0568177	0.55679	0.390728	0.753425	297	95	202
AMOT	0.672641	0.452948	0.998892	0.0493611	0.925304	0.606998	1.41053	0.718166	0.51075	0.801325	0.30137	297	75	222
AMOTL1	1.91996	1.38377	2.66392	9.46578e-05	1.51816	1.03988	2.21642	0.0305778	0.643019	0.609272	0.623288	297	147	150
AMOTL2	1.62392	1.17264	2.24886	0.00351517	1.86012	1.30176	2.65798	0.000654175	0.562007	0.403974	0.760274	297	96	201
AMPD1	0.572368	0.387135	0.84623	0.00515978	0.563535	0.361518	0.87844	0.0113349	0.53275	0.218543	0.890411	297	249	48
AMPD2	0.709151	0.507297	0.991324	0.0443307	0.664919	0.463425	0.95402	0.0267251	0.534519	0.655629	0.458904	297	120	177
AMPD3	1.49823	1.03384	2.17122	0.0326985	1.2116	0.8131	1.80539	0.345571	0.553434	0.754967	0.363014	297	207	90
AMPD3 /// CAND1.11	0.701423	0.509166	0.966275	0.0300166	0.802077	0.566718	1.13518	0.213311	0.566157	0.549669	0.60274	297	157	140
AMPH	1.86117	1.33823	2.58848	0.000223325	1.34292	0.893268	2.01893	0.15637	0.61349	0.377483	0.815068	297	84	213
AMT	0.867298	0.618791	1.21561	0.408512	0.783758	0.538549	1.14061	0.203114	0.479996	0.668874	0.383562	297	107	190
AMZ1	0.838513	0.608437	1.15559	0.28181	0.980411	0.694829	1.38337	0.910334	0.520548	0.556291	0.513699	297	143	154
AMZ2	1.63982	1.1691	2.30006	0.00417027	1.49069	1.04107	2.13452	0.029281	0.563368	0.337748	0.80137	297	80	217
AMZ2P1	1.65563	1.17844	2.32607	0.00365546	1.89224	1.29996	2.75437	0.000870021	0.5369	0.331126	0.80137	297	79	218
ANAPC1 /// LOC101930107 /// LOC285074 /// LOC730268	1.56044	1.1288	2.15714	0.00707548	1.46252	1.01591	2.10547	0.0408701	0.553434	0.417219	0.712329	297	105	192
ANAPC1 /// LOC730268	0.597981	0.433992	0.823936	0.00166573	0.80957	0.556306	1.17814	0.269776	0.605416	0.543046	0.657534	297	166	131
ANAPC10	1.23271	0.89093	1.70559	0.206646	1.24728	0.870873	1.78638	0.227968	0.524857	0.410596	0.671233	297	110	187
ANAPC11	2.29841	1.53822	3.43429	4.87323e-05	3.1125	1.9937	4.85915	5.85329e-07	0.528894	0.198675	0.924658	297	41	256
ANAPC13	1.36337	0.983836	1.88931	0.0625939	1.56947	1.10489	2.22939	0.011837	0.555883	0.602649	0.534247	297	159	138
ANAPC15	0.663938	0.47547	0.927114	0.0162073	0.604543	0.41315	0.884601	0.00956133	0.544044	0.364238	0.746575	297	206	91
ANAPC16	1.46422	1.05188	2.03821	0.0238421	1.24644	0.871346	1.78301	0.22781	0.567586	0.370861	0.767123	297	90	207
ANAPC2	0.812525	0.585014	1.12851	0.215479	0.884933	0.626341	1.25029	0.488167	0.515127	0.622517	0.438356	297	122	175
ANAPC4	1.21692	0.871137	1.69995	0.249696	1.12384	0.795097	1.58851	0.508439	0.521274	0.649007	0.438356	297	180	117
ANAPC5	1.44978	1.04418	2.01293	0.0265433	1.37857	0.974493	1.95019	0.069682	0.525265	0.384106	0.726027	297	98	199
ANAPC7	0.92595	0.653289	1.31241	0.665518	0.975413	0.665612	1.42941	0.898405	0.49052	0.304636	0.732877	297	213	84
ANG	0.663007	0.458604	0.958515	0.0288699	0.698399	0.468385	1.04137	0.0782215	0.535834	0.754967	0.342466	297	88	209
ANGEL1	0.725635	0.522619	1.00751	0.0554595	0.718129	0.506947	1.01728	0.0623901	0.526399	0.390728	0.712329	297	197	100
ANGEL2	0.828071	0.599964	1.14291	0.251174	1.02875	0.727198	1.45534	0.872782	0.520593	0.576159	0.5	297	138	159
ANGPT1	2.08807	1.48421	2.93763	2.3661e-05	1.50852	1.02817	2.2133	0.0355548	0.653815	0.675497	0.582192	297	163	134
ANGPT2	1.63033	1.17121	2.26941	0.00377328	1.59219	1.13151	2.24043	0.00760898	0.566134	0.370861	0.773973	297	89	208
ANGPT4	0.551886	0.394948	0.771186	0.000497711	0.52469	0.366535	0.751088	0.000425244	0.594257	0.357616	0.80137	297	215	82
ANGPTL1	2.84581	2.00985	4.02947	3.77137e-09	2.65799	1.64706	4.2894	6.24029e-05	0.602649	0.311258	0.945205	297	55	242
ANGPTL2	1.89542	1.34202	2.67702	0.000283504	1.15496	0.733545	1.81846	0.533923	0.603828	0.311258	0.863014	297	67	230
ANGPTL3	1.81552	0.982283	3.35555	0.0570504	1.53919	0.744963	3.18018	0.244111	0.497551	0.0728477	0.965753	297	16	281
ANGPTL4	1.23235	0.890183	1.70604	0.20804	1.46147	1.03995	2.05384	0.0288468	0.498095	0.596026	0.465753	297	168	129
ANGPTL6	0.751259	0.544164	1.03717	0.0821802	0.801956	0.570542	1.12723	0.203902	0.534655	0.437086	0.664384	297	183	114
ANGPTL7	3.11244	1.95168	4.96355	1.85947e-06	2.95553	1.49918	5.82659	0.00175277	0.522839	0.139073	0.993151	297	22	275
ANHX	0.720495	0.522397	0.993712	0.0456714	0.781151	0.560546	1.08858	0.144644	0.550168	0.562914	0.568493	297	150	147
ANK1	0.522306	0.378373	0.720991	7.85321e-05	0.529302	0.370406	0.756359	0.000477269	0.591899	0.450331	0.732877	297	191	106
ANK2	1.56489	1.13719	2.15346	0.00597356	1.10647	0.740878	1.65248	0.62102	0.60401	0.503311	0.664384	297	125	172
ANK3	0.737707	0.535746	1.0158	0.0623348	0.98024	0.697339	1.37791	0.908548	0.533566	0.476821	0.616438	297	170	127
ANKAR	0.810331	0.58191	1.12841	0.213184	0.626938	0.442676	0.887899	0.00854889	0.518053	0.377483	0.69863	297	197	100
ANKDD1A	2.18775	1.57765	3.03378	2.68868e-06	1.31222	0.885692	1.94415	0.175497	0.649642	0.602649	0.671233	297	139	158
ANKEF1	0.500563	0.355064	0.705684	7.83675e-05	0.773918	0.514593	1.16393	0.21836	0.589676	0.324503	0.876712	297	231	66
ANKFN1	0.620126	0.446701	0.86088	0.00430359	0.664546	0.470356	0.93891	0.0204799	0.567903	0.615894	0.534247	297	137	160
ANKFN1 /// BC037494	1.05868	0.767888	1.45958	0.727832	0.996595	0.71465	1.38977	0.983964	0.483149	0.549669	0.493151	297	157	140
ANKFY1	0.569009	0.408324	0.792929	0.000867268	0.632116	0.443121	0.901721	0.0113821	0.622426	0.642384	0.575342	297	139	158
ANKH	1.64043	1.1661	2.30771	0.00447759	1.32829	0.922026	1.91357	0.127476	0.550758	0.675497	0.479452	297	178	119
ANKHD1	1.51733	1.05671	2.17874	0.023898	1.13917	0.779556	1.66469	0.500782	0.565182	0.735099	0.410959	297	197	100
ANKHD1 /// ANKHD1-EIF4EBP3	0.737749	0.53531	1.01675	0.0630998	0.893838	0.632513	1.26313	0.524731	0.567314	0.556291	0.582192	297	153	144
ANKHD1 /// ANKHD1-EIF4EBP3 /// EIF4EBP3	0.866124	0.628755	1.1931	0.379113	0.889062	0.633366	1.24799	0.496751	0.459675	0.536424	0.506849	297	145	152
ANKIB1	1.57946	1.14765	2.17373	0.00502924	1.56786	1.10946	2.21567	0.0108141	0.571396	0.496689	0.643836	297	127	170
ANKLE1	1.18761	0.862432	1.6354	0.292192	1.27227	0.9072	1.78426	0.162851	0.498889	0.536424	0.513699	297	152	145
ANKLE2	0.869102	0.627691	1.20336	0.398112	1.13604	0.799996	1.61324	0.475947	0.528441	0.410596	0.684932	297	190	107
ANKMY1	0.650798	0.470787	0.899639	0.00931833	0.738748	0.526177	1.0372	0.0802888	0.562324	0.423841	0.712329	297	192	105
ANKMY2	1.25347	0.766024	2.05108	0.368584	1.23482	0.737105	2.0686	0.422988	0.496598	0.880795	0.171233	297	254	43
ANKRA2	1.16365	0.824332	1.64264	0.388867	1.4086	0.976418	2.03208	0.0669027	0.491926	0.311258	0.746575	297	84	213
ANKRD1	1.42256	1.02357	1.97706	0.0358428	1.39398	0.981251	1.98032	0.0636954	0.545178	0.377483	0.739726	297	95	202
ANKRD10	1.70351	1.18966	2.43929	0.0036367	1.41421	0.974105	2.05317	0.0684501	0.585594	0.728477	0.452055	297	190	107
ANKRD10-IT1	2.14123	1.50945	3.03745	1.97153e-05	1.53408	1.0584	2.22354	0.0238401	0.633221	0.701987	0.568493	297	169	128
ANKRD11	1.27616	0.905884	1.79778	0.163121	1.21396	0.834579	1.76581	0.310513	0.499864	0.682119	0.376712	297	194	103
ANKRD12	1.46495	1.06378	2.01743	0.019354	1.24585	0.883638	1.75653	0.209785	0.557335	0.463576	0.671233	297	118	179
ANKRD13A	1.32901	0.957387	1.84489	0.0891812	0.949811	0.665283	1.35603	0.776832	0.52649	0.615894	0.493151	297	167	130
ANKRD13B	0.716105	0.490548	1.04538	0.0836207	0.809531	0.548472	1.19485	0.28744	0.513699	0.238411	0.849315	297	240	57
ANKRD13C	0.44087	0.286894	0.677484	0.000186795	0.622572	0.3913	0.990534	0.045489	0.593668	0.84106	0.369863	297	79	218
ANKRD13D	2.00869	1.45529	2.77254	2.2176e-05	1.57591	1.12251	2.21246	0.00859918	0.636941	0.562914	0.678082	297	132	165
ANKRD16	1.38773	0.990197	1.94485	0.057072	1.55779	1.08426	2.23814	0.016507	0.544226	0.662252	0.452055	297	180	117
ANKRD17	0.750321	0.54316	1.03649	0.0814157	0.863749	0.61206	1.21894	0.404591	0.536061	0.582781	0.527397	297	141	156
ANKRD18A	1.11351	0.806287	1.53778	0.513927	1.19563	0.854527	1.67291	0.297123	0.496507	0.576159	0.479452	297	163	134
ANKRD18B	1.41202	0.986128	2.02184	0.0596058	1.31749	0.901773	1.92484	0.154028	0.522793	0.271523	0.815068	297	68	229
ANKRD19P	0.746494	0.539673	1.03258	0.0773452	0.646549	0.46174	0.905326	0.0111163	0.528531	0.423841	0.657534	297	184	113
ANKRD2	1.28729	0.935262	1.77181	0.121298	1.15511	0.825207	1.61691	0.400717	0.507462	0.476821	0.616438	297	128	169
ANKRD20A1 /// ANKRD20A11P /// ANKRD20A2 /// ANKRD20A3 /// ANKRD20A4 /// ANKRD20A5P /// ANKRD20A9P /// LOC102723891 /// LOC102725051	1.66704	1.21024	2.29627	0.00176097	1.50456	1.06601	2.12353	0.0201489	0.610859	0.536424	0.650685	297	132	165
ANKRD20A1 /// ANKRD20A12P /// ANKRD20A2 /// ANKRD20A3 /// ANKRD20A4 /// ANKRD20A5P /// ANKRD20A8P	1.22648	0.87527	1.71861	0.235623	0.989384	0.678976	1.4417	0.955693	0.513925	0.337748	0.726027	297	91	206
ANKRD20A1 /// ANKRD20A2 /// ANKRD20A3 /// ANKRD20A4	1.78118	1.12313	2.82477	0.0141476	1.50798	0.934068	2.43453	0.0927889	0.523201	0.860927	0.260274	297	238	59
ANKRD20A11P	1.68003	1.16276	2.4274	0.00572547	1.45487	0.99706	2.12289	0.051812	0.588066	0.748344	0.417808	297	198	99
ANKRD20A12P	1.39551	1.01214	1.9241	0.0419916	1.44061	1.01726	2.04013	0.039746	0.515286	0.443709	0.664384	297	116	181
ANKRD20A12P /// LOC101059949 /// LOC101060632 /// LOC101927345	1.21473	0.863851	1.70812	0.263374	0.914056	0.623026	1.34103	0.645875	0.539395	0.324503	0.767123	297	83	214
ANKRD20A5P /// ANKRD20A5P	1.54663	1.06348	2.24927	0.0224856	1.19422	0.804704	1.77228	0.3782	0.551551	0.761589	0.363014	297	208	89
ANKRD22	0.472569	0.343007	0.651071	4.54396e-06	0.474294	0.333805	0.673911	3.15463e-05	0.638166	0.490066	0.753425	297	188	109
ANKRD23	1.47614	1.06899	2.03837	0.0180236	1.14944	0.800838	1.6498	0.450013	0.560079	0.430464	0.705479	297	108	189
ANKRD23 /// ANKRD39	0.58061	0.375226	0.898414	0.0146502	0.795847	0.496188	1.27648	0.343486	0.531979	0.165563	0.938356	297	264	33
ANKRD24	0.654774	0.475152	0.902299	0.00964307	0.634253	0.454668	0.884769	0.00734425	0.555929	0.470199	0.671233	297	179	118
ANKRD26	1.71849	1.12602	2.62268	0.012065	1.3757	0.873515	2.16658	0.168696	0.557788	0.827815	0.280822	297	230	67
ANKRD26P3	0.794153	0.534881	1.1791	0.253057	0.860697	0.570017	1.29961	0.475533	0.518824	0.801325	0.273973	297	71	226
ANKRD27	0.579905	0.379927	0.885144	0.0115559	0.658772	0.420579	1.03186	0.0683094	0.502812	0.178808	0.924658	297	260	37
ANKRD28	1.56633	1.09413	2.24234	0.0142312	1.29224	0.877527	1.90294	0.194171	0.563504	0.728477	0.410959	297	196	101
ANKRD29	2.09906	1.43585	3.0686	0.000129624	1.85736	1.19519	2.88639	0.00591085	0.567223	0.231788	0.931507	297	45	252
ANKRD30A	1.11851	0.812936	1.53896	0.491506	1.03921	0.743486	1.45257	0.821878	0.497301	0.503311	0.541096	297	143	154
ANKRD30B	0.650021	0.401414	1.05259	0.0798538	0.676859	0.413462	1.10805	0.120671	0.518144	0.13245	0.924658	297	267	30
ANKRD30BL /// ANKRD30BP2 /// LOC100132004 /// LOC100132154	1.27758	0.920959	1.77229	0.142402	1.29856	0.919244	1.83439	0.138278	0.524653	0.390728	0.705479	297	102	195
ANKRD30BP2	0.54925	0.383527	0.786582	0.00107532	0.654435	0.451049	0.949533	0.0255713	0.602354	0.735099	0.458904	297	108	189
ANKRD30BP3	0.77533	0.562734	1.06824	0.119651	0.877545	0.62751	1.22721	0.445217	0.533407	0.549669	0.541096	297	148	149
ANKRD31	1.3057	0.948731	1.79699	0.101635	1.49364	1.06657	2.0917	0.0195398	0.529302	0.516556	0.582192	297	139	158
ANKRD32	0.713867	0.51085	0.997563	0.0483526	0.852112	0.584134	1.24303	0.406134	0.536651	0.655629	0.472603	297	122	175
ANKRD33	0.847296	0.610175	1.17657	0.322539	0.785276	0.551286	1.11858	0.180525	0.483126	0.390728	0.678082	297	192	105
ANKRD33B	1.60946	1.0725	2.41527	0.0215666	1.81275	1.15107	2.85478	0.0102535	0.530709	0.192053	0.883562	297	46	251
ANKRD34A	1.55633	1.10846	2.18516	0.0106295	1.16278	0.810258	1.66868	0.413172	0.575388	0.668874	0.493151	297	175	122
ANKRD34C	0.772104	0.560374	1.06383	0.113748	0.947651	0.681367	1.318	0.749377	0.521092	0.549669	0.541096	297	148	149
ANKRD35	2.52564	1.74966	3.64577	7.53915e-07	1.98428	1.15927	3.39641	0.0124573	0.607321	0.258278	0.945205	297	47	250
ANKRD36	0.761103	0.523297	1.10698	0.153226	0.738794	0.490639	1.11246	0.147158	0.53969	0.768212	0.321918	297	83	214
ANKRD36B	1.97934	1.43223	2.73545	3.53107e-05	1.5978	1.13752	2.24432	0.00686648	0.61848	0.576159	0.657534	297	137	160
ANKRD36BP2	1.21891	0.883113	1.68239	0.228603	0.767857	0.531593	1.10913	0.159156	0.490202	0.430464	0.657534	297	115	182
ANKRD36C	1.71742	1.22309	2.41154	0.00179188	1.49641	1.04071	2.15164	0.0296056	0.577815	0.331126	0.835616	297	74	223
ANKRD37	0.796333	0.564204	1.12397	0.195223	1.06614	0.724095	1.56974	0.745606	0.51202	0.695364	0.39726	297	105	192
ANKRD39	0.569545	0.410485	0.79024	0.000754797	0.783284	0.538894	1.13851	0.200497	0.59453	0.615894	0.609589	297	148	149
ANKRD40	1.69735	1.21391	2.37332	0.00197912	1.52333	1.05563	2.19825	0.0244941	0.574254	0.649007	0.506849	297	170	127
ANKRD44	1.3392	0.965565	1.85741	0.0801174	0.968296	0.654525	1.43249	0.871909	0.50694	0.390728	0.69863	297	103	194
ANKRD44-IT1	1.52126	1.05956	2.18413	0.0229968	1.34	0.919068	1.95371	0.12819	0.524676	0.735099	0.390411	297	200	97
ANKRD45	0.651653	0.472943	0.897892	0.00883056	0.673677	0.47139	0.962772	0.0301424	0.557448	0.463576	0.671233	297	180	117
ANKRD46	1.20654	0.820062	1.77516	0.340573	1.44821	0.963999	2.17565	0.0745216	0.502676	0.218543	0.835616	297	57	240
ANKRD46 /// GAPDHP62	0.637081	0.379156	1.07046	0.088606	0.489334	0.285295	0.839298	0.00942097	0.502359	0.112583	0.931507	297	271	26
ANKRD49	1.41494	1.00714	1.98784	0.0453916	1.24537	0.866182	1.79055	0.23622	0.561871	0.331126	0.794521	297	80	217
ANKRD50	2.1605	1.52542	3.06	1.43985e-05	2.24526	1.43271	3.51864	0.000417682	0.552935	0.304636	0.883562	297	63	234
ANKRD52	0.537402	0.387226	0.745818	0.000204147	0.764497	0.539059	1.08421	0.131965	0.585707	0.615894	0.609589	297	148	149
ANKRD53	1.49049	1.01298	2.19309	0.0428241	1.55064	1.02965	2.33523	0.0357425	0.532977	0.218543	0.89726	297	48	249
ANKRD54	2.05808	1.32829	3.18883	0.00123509	1.81002	1.1385	2.87762	0.0121305	0.50508	0.15894	0.938356	297	33	264
ANKRD55	1.52105	0.877136	2.63767	0.135379	1.25261	0.706897	2.21959	0.440345	0.493468	0.907285	0.143836	297	262	35
ANKRD6	2.41985	1.75502	3.33653	6.96933e-08	1.82003	1.24533	2.65995	0.00198015	0.654178	0.496689	0.780822	297	107	190
ANKRD60	0.556362	0.403899	0.766376	0.000332719	0.57353	0.399166	0.824059	0.00264318	0.599995	0.483444	0.719178	297	184	113
ANKRD65	2.07089	1.50245	2.85438	8.72448e-06	1.86898	1.29756	2.69205	0.000782087	0.615985	0.470199	0.773973	297	104	193
ANKRD7	1.35102	0.978778	1.86484	0.0673209	1.17359	0.834107	1.65123	0.358218	0.528871	0.430464	0.678082	297	112	185
ANKRD9	0.650106	0.468728	0.901669	0.0098757	0.777611	0.547914	1.1036	0.159102	0.550304	0.615894	0.527397	297	136	161
ANKS1A	2.42103	1.68648	3.47551	1.64128e-06	1.93074	1.28747	2.8954	0.00146208	0.589721	0.271523	0.917808	297	53	244
ANKS1B	1.83099	1.30116	2.57656	0.000519609	1.49678	1.01043	2.21722	0.0442488	0.586274	0.324503	0.849315	297	71	226
ANKS3	1.72404	1.12206	2.64898	0.0129372	1.57732	1.01302	2.45596	0.0436709	0.550984	0.834437	0.315068	297	226	71
ANKS4B	0.480119	0.324778	0.70976	0.000234214	0.628799	0.415266	0.952132	0.0284024	0.621972	0.794702	0.417808	297	93	204
ANKS6	0.633834	0.458961	0.875336	0.00563408	0.754452	0.522772	1.0888	0.132222	0.570761	0.576159	0.589041	297	151	146
ANKUB1	0.471559	0.341559	0.651037	4.92068e-06	0.540276	0.379686	0.768788	0.000623942	0.634718	0.569536	0.691781	297	167	130
ANKZF1	0.763527	0.553041	1.05412	0.10108	0.839742	0.592	1.19116	0.327466	0.50499	0.562914	0.520548	297	143	154
ANLN	0.596753	0.424304	0.83929	0.0030092	0.904157	0.600842	1.36059	0.62895	0.61544	0.682119	0.520548	297	125	172
ANO1	0.562107	0.405828	0.778566	0.000528431	0.586967	0.411453	0.837351	0.00329006	0.579606	0.602649	0.609589	297	150	147
ANO10	0.764792	0.551285	1.06099	0.108383	0.891891	0.625362	1.27202	0.527622	0.514492	0.397351	0.69863	297	194	103
ANO2	0.774073	0.549479	1.09047	0.143017	0.84581	0.588781	1.21504	0.364895	0.49805	0.324503	0.746575	297	212	85
ANO3	1.78074	1.2198	2.59963	0.00279677	1.66515	1.10326	2.5132	0.015188	0.549601	0.231788	0.89726	297	50	247
ANO4	1.5413	1.1088	2.1425	0.0100356	1.61841	1.14418	2.28918	0.00650293	0.550304	0.622517	0.534247	297	162	135
ANO5	1.74535	1.2655	2.40715	0.000685041	1.55046	1.0811	2.22358	0.0171328	0.625283	0.549669	0.657534	297	133	164
ANO6	1.26244	0.870862	1.83009	0.218657	1.40073	0.936203	2.09575	0.101153	0.502858	0.245033	0.808219	297	65	232
ANO7	0.770472	0.510564	1.16269	0.214238	0.792347	0.514431	1.2204	0.290899	0.506169	0.821192	0.232877	297	62	235
ANO8	0.773402	0.549991	1.08757	0.139584	0.889686	0.607218	1.30355	0.54867	0.51422	0.682119	0.390411	297	106	191
ANO9	0.350489	0.154765	0.793735	0.0119419	0.483221	0.209086	1.11678	0.088838	0.535108	0.966887	0.136986	297	26	271
ANP32A	0.690122	0.501175	0.950304	0.0230714	0.969733	0.680739	1.38141	0.864819	0.595029	0.476821	0.684932	297	180	117
ANP32A-IT1	1.48216	1.05585	2.08059	0.0229639	1.17675	0.816983	1.69493	0.382003	0.545564	0.668874	0.452055	297	181	116
ANP32B	0.643167	0.466709	0.886341	0.00698941	0.733642	0.516113	1.04285	0.0843264	0.568765	0.549669	0.630137	297	161	136
ANP32C	0.666619	0.484304	0.917568	0.0128574	0.776074	0.538759	1.11792	0.173404	0.537558	0.483444	0.657534	297	175	122
ANP32D	1.02621	0.745361	1.41287	0.87401	1.08718	0.76956	1.53588	0.635409	0.491155	0.529801	0.506849	297	152	145
ANP32E	0.727084	0.528258	1.00075	0.0505369	0.903764	0.627578	1.30149	0.586581	0.57194	0.490066	0.664384	297	175	122
ANPEP	0.517088	0.263349	1.01531	0.0553863	0.815917	0.40286	1.65249	0.572067	0.526173	0.94702	0.136986	297	29	268
ANTXR1	1.76182	1.22308	2.53786	0.00235519	1.30485	0.875478	1.94481	0.191267	0.588633	0.741722	0.431507	297	195	102
ANTXR2	2.05298	1.43635	2.93434	7.917e-05	2.03021	1.29291	3.18796	0.0020994	0.557924	0.278146	0.883562	297	59	238
ANXA1	1.23428	0.85714	1.77736	0.257895	1.56117	1.05155	2.31779	0.0271572	0.496734	0.258278	0.794521	297	69	228
ANXA10	0.768752	0.558472	1.05821	0.106753	0.751024	0.528206	1.06783	0.110832	0.524404	0.523179	0.554795	297	154	143
ANXA11	0.694884	0.4911	0.98323	0.0398343	0.815074	0.559565	1.18725	0.286635	0.520004	0.311258	0.773973	297	218	79
ANXA13	0.659059	0.443854	0.978607	0.0387171	0.603507	0.393285	0.926099	0.0208132	0.534247	0.801325	0.321918	297	78	219
ANXA2	0.567237	0.403858	0.796712	0.00107118	0.935901	0.62412	1.40343	0.748621	0.617436	0.675497	0.527397	297	127	170
ANXA2 /// NHP2L1	0.77734	0.564457	1.07051	0.122912	1.007	0.701693	1.44514	0.969817	0.525039	0.470199	0.630137	297	173	124
ANXA2P1	0.521731	0.377258	0.721531	8.39041e-05	0.750202	0.509491	1.10464	0.145428	0.633925	0.589404	0.650685	297	158	139
ANXA2P2	0.509948	0.370019	0.702792	3.87012e-05	0.795254	0.534709	1.18275	0.257972	0.617255	0.490066	0.739726	297	186	111
ANXA2P3	0.417526	0.301487	0.578226	1.46239e-07	0.648411	0.422972	0.994004	0.0468609	0.666289	0.423841	0.842466	297	211	86
ANXA2R	1.7088	1.07714	2.71088	0.0228721	1.76164	1.06867	2.90396	0.0263922	0.500726	0.139073	0.917808	297	33	264
ANXA3	0.545124	0.380582	0.780805	0.000934164	0.691143	0.466236	1.02455	0.0658809	0.58954	0.735099	0.458904	297	108	189
ANXA4	0.532791	0.383708	0.739798	0.000170264	0.651676	0.449405	0.944986	0.0239208	0.604917	0.615894	0.616438	297	149	148
ANXA5	1.42589	1.03593	1.96265	0.0295186	1.21582	0.839545	1.76074	0.300999	0.55992	0.490066	0.630137	297	128	169
ANXA6	1.81516	1.31795	2.49995	0.000261834	1.0444	0.710977	1.53418	0.824781	0.620339	0.470199	0.746575	297	108	189
ANXA7	0.764133	0.550925	1.05985	0.107025	1.00007	0.700895	1.42696	0.999672	0.548988	0.615894	0.513699	297	134	163
ANXA8 /// ANXA8L1	1.36363	0.926902	2.00612	0.115352	1.21784	0.814926	1.81997	0.336302	0.518189	0.781457	0.294521	297	221	76
ANXA8 /// ANXA8L1 /// LOC100996760 /// LOC102725207	0.648509	0.469716	0.895358	0.00849817	0.61833	0.442183	0.864646	0.00495267	0.57752	0.437086	0.719178	297	191	106
ANXA9	1.6288	1.05981	2.50324	0.0260869	1.97949	1.22943	3.18715	0.00495497	0.514424	0.165563	0.89726	297	40	257
AOAH	0.677682	0.366781	1.25212	0.214178	0.29701	0.148635	0.593501	0.000588087	0.500953	0.933775	0.116438	297	28	269
AOC1	1.25456	0.80441	1.95662	0.317243	1.54916	0.91162	2.63258	0.105677	0.516692	0.847682	0.226027	297	241	56
AOC2	0.727804	0.517532	1.02351	0.0677921	0.87837	0.610648	1.26347	0.484441	0.552776	0.682119	0.431507	297	112	185
AOC3	2.00285	1.45192	2.76281	2.31681e-05	1.48924	1.00532	2.2061	0.0469839	0.645469	0.556291	0.69863	297	128	169
AOC4P	0.64276	0.434935	0.94989	0.0265586	0.664112	0.438629	1.00551	0.0531111	0.51828	0.218543	0.876712	297	247	50
AOX1	2.01814	1.40073	2.9077	0.000164166	1.54343	1.02525	2.32351	0.0375762	0.60841	0.741722	0.465753	297	190	107
AOX2P	0.718194	0.514064	1.00338	0.0523589	0.841415	0.598213	1.18349	0.321172	0.529098	0.655629	0.458904	297	120	177
AP000230.1	0.541825	0.382788	0.766938	0.000546752	0.794969	0.54008	1.17015	0.244706	0.604577	0.311258	0.863014	297	231	66
AP000253.1	1.71066	1.21378	2.41093	0.00216499	1.56836	1.09103	2.25454	0.0150797	0.570738	0.682119	0.493151	297	177	120
AP000265.1	1.44357	1.02845	2.02625	0.0338269	1.35378	0.952566	1.92397	0.0912218	0.532795	0.331126	0.80137	297	79	218
AP000266.7 /// BC034802 /// LOC100128198	0.843131	0.598463	1.18783	0.329207	0.925348	0.650701	1.31592	0.665847	0.502268	0.688742	0.390411	297	105	192
AP000347.2	1.74435	1.26182	2.4114	0.000758517	1.37534	0.972885	1.94429	0.0711788	0.605507	0.582781	0.623288	297	143	154
AP000462.1	1.12148	0.810085	1.55259	0.489653	0.978491	0.696152	1.37534	0.90038	0.502926	0.596026	0.472603	297	167	130
AP000473.8	0.698253	0.474379	1.02778	0.068601	0.579067	0.383568	0.87421	0.00933195	0.531684	0.788079	0.308219	297	78	219
AP000525.9	1.24476	0.88194	1.75683	0.213002	1.29056	0.882876	1.88649	0.187888	0.49932	0.688742	0.376712	297	195	102
AP000696.2	0.660521	0.457151	0.954363	0.0271929	0.722504	0.492551	1.05981	0.0963565	0.555362	0.754967	0.383562	297	94	203
AP001062.7 /// C21orf2	0.642588	0.456604	0.904329	0.011187	0.722907	0.502147	1.04072	0.0809368	0.556564	0.682119	0.452055	297	115	182
AP001063.1	0.664741	0.478642	0.923197	0.0148166	0.788679	0.552606	1.1256	0.190862	0.554137	0.390728	0.732877	297	200	97
AP001171.1	0.502735	0.360942	0.700229	4.74543e-05	0.501994	0.351727	0.716461	0.000146427	0.606164	0.377483	0.828767	297	216	81
AP001189.4	1.26322	0.908851	1.75577	0.164221	1.41084	1.00048	1.98952	0.0496839	0.519437	0.377483	0.69863	297	101	196
AP001347.6 /// BC024173 /// BC048201	1.55772	1.12877	2.14968	0.0069956	1.13326	0.789504	1.62669	0.497548	0.599882	0.562914	0.60274	297	143	154
AP001462.6	2.14207	1.53656	2.9862	6.98893e-06	2.14741	1.50752	3.05892	2.29707e-05	0.644312	0.635762	0.643836	297	148	149
AP001604.3 /// BC043580	1.08715	0.789636	1.49676	0.608503	0.958963	0.688356	1.33595	0.804355	0.478295	0.470199	0.568493	297	134	163
AP001605.4	0.780937	0.564592	1.08018	0.135189	0.918068	0.649441	1.29781	0.628378	0.531298	0.596026	0.5	297	135	162
AP001630.5	0.661854	0.474703	0.92279	0.0149402	0.685532	0.484379	0.970221	0.0331255	0.565681	0.370861	0.753425	297	206	91
AP006216.10	1.1833	0.852375	1.6427	0.314608	1.22665	0.869214	1.73108	0.245067	0.531933	0.384106	0.691781	297	103	194
AP006216.12 /// APOA1-AS	0.568933	0.394863	0.819739	0.00247274	0.680951	0.466929	0.993073	0.0459261	0.507688	0.264901	0.869863	297	239	58
AP006222.2	1.20359	0.874403	1.6567	0.255671	1.4594	1.03785	2.05218	0.0297383	0.489522	0.523179	0.547945	297	145	152
AP006547.3	0.756167	0.535726	1.06732	0.111953	0.810048	0.565521	1.16031	0.250553	0.543772	0.695364	0.39726	297	105	192
AP1AR	0.452964	0.314458	0.652478	2.10962e-05	0.61742	0.403183	0.945495	0.0265732	0.654813	0.748344	0.527397	297	116	181
AP1B1	0.573059	0.414164	0.792914	0.000778013	0.677485	0.478738	0.958742	0.0279644	0.583326	0.423841	0.760274	297	199	98
AP1G1	0.545533	0.38818	0.766673	0.000482556	0.636934	0.430719	0.94188	0.0238244	0.573347	0.337748	0.828767	297	222	75
AP1G2	0.666769	0.459763	0.966981	0.0325982	0.841136	0.55461	1.27569	0.415569	0.540506	0.251656	0.849315	297	238	59
AP1G2 /// JPH4	1.38787	1.0054	1.91583	0.0462904	1.4372	1.00421	2.0569	0.0473762	0.512111	0.430464	0.678082	297	112	185
AP1M1	1.72898	1.19591	2.49967	0.00360054	1.35351	0.911016	2.01092	0.133982	0.547854	0.748344	0.390411	297	202	95
AP1M2	0.491543	0.356064	0.678572	1.58165e-05	0.615169	0.40668	0.930543	0.0213988	0.613989	0.450331	0.780822	297	198	99
AP1S1	0.534824	0.388545	0.736175	0.000123684	0.762406	0.530337	1.09603	0.142962	0.606051	0.509934	0.719178	297	180	117
AP1S2	2.70355	1.89354	3.86005	4.40464e-08	4.02829	2.14418	7.56797	1.48608e-05	0.613263	0.284768	0.924658	297	54	243
AP1S3	0.50459	0.366026	0.695609	2.96831e-05	0.742087	0.49983	1.10176	0.139047	0.640524	0.470199	0.753425	297	191	106
AP2A1	1.41269	1.02498	1.94705	0.0347986	1.28529	0.913953	1.8075	0.149092	0.559104	0.549669	0.589041	297	143	154
AP2A2	1.3073	0.94972	1.79951	0.100269	1.32873	0.937396	1.88344	0.110318	0.517282	0.476821	0.623288	297	127	170
AP2B1	0.602296	0.43489	0.834142	0.00227755	0.7792	0.547058	1.10985	0.166835	0.586818	0.410596	0.760274	297	201	96
AP2M1	0.481123	0.196966	1.17523	0.108357	0.346853	0.134699	0.893155	0.0282277	0.481357	0.0397351	0.993151	297	291	6
AP2S1	0.488688	0.351426	0.679564	2.07893e-05	0.508315	0.353403	0.731132	0.000263736	0.613172	0.390728	0.835616	297	215	82
AP3B1	0.576142	0.417545	0.79498	0.000788819	0.823986	0.571022	1.18901	0.300806	0.621292	0.569536	0.643836	297	160	137
AP3B2	1.44219	1.00133	2.07715	0.0491728	1.21911	0.832369	1.78555	0.308874	0.530709	0.741722	0.369863	297	204	93
AP3D1	0.831577	0.603289	1.14625	0.260013	1.08024	0.764439	1.52651	0.661757	0.534564	0.556291	0.520548	297	144	153
AP3M1	1.39219	0.709672	2.73112	0.335837	1.42071	0.71497	2.82307	0.316198	0.482899	0.940397	0.0958904	297	274	23
AP3M2	1.57225	1.09494	2.25764	0.0142349	1.70443	1.14785	2.53087	0.00820302	0.538646	0.735099	0.383562	297	201	96
AP3S1	1.17939	0.847507	1.64123	0.327772	1.07446	0.741183	1.55761	0.704619	0.499569	0.629139	0.431507	297	178	119
AP3S2 /// C15orf38-AP3S2	0.68806	0.481834	0.98255	0.0397047	0.892662	0.60743	1.31183	0.563205	0.551801	0.728477	0.40411	297	101	196
AP4B1	0.490684	0.31203	0.771626	0.00205334	0.699292	0.429817	1.13771	0.149755	0.57185	0.860927	0.30137	297	66	231
AP4E1	0.788017	0.572267	1.08511	0.144413	1.15481	0.807977	1.65052	0.429603	0.557244	0.476821	0.616438	297	170	127
AP4M1	0.737404	0.525304	1.03514	0.0783461	0.947825	0.654858	1.37186	0.776376	0.533884	0.675497	0.438356	297	114	183
AP4S1	1.9351	1.39564	2.68308	7.5215e-05	1.28923	0.903188	1.84028	0.161764	0.625193	0.602649	0.630137	297	145	152
AP5B1	0.591466	0.422372	0.828255	0.00223714	0.585818	0.412299	0.832365	0.00284728	0.547854	0.662252	0.506849	297	126	171
AP5M1	0.540043	0.363617	0.80207	0.00226677	0.610673	0.397319	0.938594	0.0245165	0.554432	0.801325	0.356164	297	83	214
AP5S1	1.23596	0.885966	1.72422	0.212333	1.10532	0.749212	1.63068	0.613779	0.546584	0.642384	0.458904	297	176	121
AP5Z1 /// MIR4656	1.39001	0.996309	1.9393	0.052599	1.52461	1.03497	2.24592	0.0328544	0.519958	0.357616	0.739726	297	92	205
APAF1	0.428679	0.310471	0.591893	2.66129e-07	0.490796	0.345732	0.696726	6.84924e-05	0.674136	0.562914	0.739726	297	175	122
APBA1	1.75178	1.02736	2.98701	0.0394856	1.0386	0.581273	1.85574	0.898231	0.533158	0.900662	0.184932	297	255	42
APBA2	1.44544	1.01971	2.04891	0.0384872	1.1469	0.780857	1.68454	0.484671	0.530845	0.701987	0.417808	297	191	106
APBA3	0.922917	0.667229	1.27659	0.627932	0.941132	0.661372	1.33923	0.736046	0.494602	0.596026	0.452055	297	128	169
APBB1	1.98186	1.39025	2.8252	0.000155955	1.89914	1.29281	2.78983	0.00108009	0.629978	0.715232	0.506849	297	180	117
APBB1IP	1.17049	0.807556	1.69652	0.405822	1.05816	0.714418	1.5673	0.777893	0.489023	0.754967	0.287671	297	218	79
APBB2	1.4566	0.82482	2.57229	0.194902	1.26868	0.707536	2.27486	0.424434	0.505851	0.913907	0.136986	297	264	33
APBB3 /// MIR6831	1.54015	1.10648	2.1438	0.0104777	1.56432	1.09213	2.24067	0.0146596	0.569083	0.629139	0.527397	297	164	133
APC	1.12144	0.814574	1.5439	0.482283	1.25392	0.871482	1.80418	0.222871	0.484532	0.529801	0.513699	297	151	146
APC2	0.576253	0.412846	0.804339	0.00119665	0.582963	0.408496	0.831944	0.00294	0.575388	0.649007	0.520548	297	130	167
APCDD1	2.12557	1.49514	3.02182	2.66104e-05	1.65295	1.12901	2.42003	0.00977104	0.629411	0.708609	0.554795	297	172	125
APCDD1 /// LOC100130468	1.25273	0.907667	1.72897	0.170482	1.24573	0.893829	1.73619	0.194535	0.536084	0.569536	0.513699	297	157	140
APCDD1L	1.67604	1.21748	2.3073	0.00154232	1.38054	0.993093	1.91914	0.0550194	0.603806	0.509934	0.684932	297	123	174
APCDD1L-AS1	1.36925	0.978636	1.91577	0.0666633	1.28321	0.896349	1.83703	0.173134	0.533521	0.344371	0.767123	297	86	211
APCS	0.678296	0.492441	0.934294	0.0175032	0.666353	0.477998	0.92893	0.0166248	0.552549	0.543046	0.589041	297	156	141
APEH	0.582006	0.422606	0.80153	0.000917029	0.715626	0.493219	1.03832	0.0780814	0.608319	0.476821	0.719178	297	185	112
APELA	0.684891	0.497461	0.94294	0.020335	0.657611	0.453231	0.954155	0.0273085	0.548943	0.503311	0.636986	297	169	128
APEX1	0.882987	0.638876	1.22037	0.451012	0.926681	0.660331	1.30046	0.659632	0.517645	0.589404	0.479452	297	133	164
APEX2	0.639803	0.460737	0.888462	0.00767756	0.737551	0.517831	1.0505	0.0916135	0.546085	0.390728	0.753425	297	203	94
APH1A	0.715299	0.517498	0.988704	0.0424837	1.1232	0.756841	1.6669	0.564069	0.573256	0.423841	0.705479	297	191	106
APH1B	1.62382	1.17154	2.25073	0.00360947	1.3823	0.95124	2.00868	0.0895437	0.559421	0.397351	0.732877	297	99	198
API5	0.666073	0.473631	0.936707	0.0195014	0.9356	0.643246	1.36083	0.727666	0.55484	0.331126	0.821918	297	222	75
APIP	1.30006	0.937454	1.80293	0.115756	1.01808	0.72413	1.43137	0.91788	0.517917	0.390728	0.69863	297	103	194
APITD1 /// APITD1-CORT	0.441065	0.313696	0.620151	2.50131e-06	0.572997	0.382995	0.857257	0.00674287	0.589653	0.337748	0.869863	297	228	69
APLF	0.747587	0.523597	1.0674	0.109375	0.74069	0.50354	1.08953	0.127386	0.520004	0.284768	0.80137	297	226	71
APLN	1.66305	1.19631	2.31189	0.00247437	1.60631	1.12889	2.28562	0.0084462	0.562914	0.622517	0.547945	297	160	137
APLNR	1.81891	1.2457	2.65588	0.00195164	1.22173	0.804889	1.85444	0.346929	0.580151	0.768212	0.410959	297	202	95
APLP1	1.54124	1.0811	2.19722	0.0168047	1.78962	1.20738	2.65262	0.00374918	0.55518	0.284768	0.835616	297	67	230
APLP2	1.71919	1.2478	2.36865	0.000919963	1.79458	1.26407	2.54773	0.00107321	0.580513	0.463576	0.719178	297	111	186
APMAP	1.84267	1.24502	2.7272	0.0022466	1.81565	1.18273	2.78727	0.00638342	0.519913	0.211921	0.910959	297	45	252
APOA1	1.27769	0.847326	1.92664	0.242245	1.21204	0.782354	1.87772	0.389229	0.53529	0.81457	0.273973	297	229	68
APOA1BP	0.805372	0.574751	1.12853	0.208576	0.812831	0.555147	1.19012	0.286764	0.507938	0.344371	0.739726	297	208	89
APOA2	0.721026	0.524024	0.992087	0.0445632	0.727507	0.521506	1.01488	0.0610685	0.510251	0.503311	0.636986	297	169	128
APOA4	1.29431	0.940456	1.78129	0.113375	1.36387	0.970429	1.91682	0.0739206	0.492788	0.516556	0.589041	297	138	159
APOA5	0.544722	0.364787	0.813411	0.00298321	0.666253	0.432478	1.02639	0.0655026	0.532251	0.205298	0.90411	297	253	44
APOB	1.21989	0.88377	1.68386	0.226803	1.11291	0.795066	1.55782	0.53298	0.521364	0.569536	0.513699	297	157	140
APOBEC1	0.709274	0.5142	0.978356	0.0363217	0.849642	0.594051	1.2152	0.372164	0.539917	0.562914	0.547945	297	147	150
APOBEC2	1.63367	1.18671	2.24896	0.00261549	1.34844	0.943453	1.92728	0.100894	0.581103	0.523179	0.657534	297	129	168
APOBEC3A /// APOBEC3A_B	0.711732	0.499633	1.01387	0.0596094	0.767569	0.531091	1.10934	0.159207	0.562188	0.721854	0.40411	297	102	195
APOBEC3B	0.741004	0.520187	1.05556	0.0968236	0.92645	0.643453	1.33391	0.681235	0.521954	0.291391	0.808219	297	226	71
APOBEC3C	1.47748	1.03741	2.10424	0.0305015	1.12709	0.770128	1.64952	0.538073	0.547265	0.715232	0.410959	297	194	103
APOBEC3D	0.576136	0.412329	0.805018	0.00123478	0.572275	0.398891	0.821025	0.00243891	0.613399	0.655629	0.534247	297	131	166
APOBEC3F	0.706045	0.512739	0.972227	0.0329636	0.738894	0.522436	1.04504	0.0871013	0.54037	0.536424	0.589041	297	157	140
APOBEC3F /// APOBEC3G	1.111	0.80716	1.52922	0.518451	1.2473	0.872466	1.78316	0.225589	0.461172	0.496689	0.527397	297	144	153
APOBEC3G	1.22238	0.883489	1.69127	0.225448	1.02518	0.715211	1.46948	0.892333	0.499682	0.589404	0.486301	297	164	133
APOBEC4	3.26012	1.03821	10.2372	0.0429509	2.45214	0.768842	7.82082	0.129583	0.492652	0.980132	0.0753425	297	283	14
APOBR	0.584422	0.422658	0.808098	0.00115951	0.597054	0.423651	0.841431	0.00321655	0.598861	0.589404	0.623288	297	154	143
APOC1	1.60526	1.10248	2.33733	0.0135531	1.12037	0.716047	1.75299	0.618761	0.526127	0.238411	0.856164	297	57	240
APOC2	0.880347	0.639752	1.21142	0.433969	0.965424	0.681412	1.36781	0.843081	0.506033	0.496689	0.568493	297	160	137
APOC2 /// APOC4 /// APOC4-APOC2	0.865716	0.628861	1.19178	0.376599	0.666288	0.4705	0.943551	0.0221791	0.497913	0.483444	0.589041	297	165	132
APOC3	1.20101	0.867565	1.66262	0.269669	1.12738	0.80189	1.58499	0.490335	0.509344	0.403974	0.664384	297	110	187
APOD	2.20626	1.51087	3.22172	4.19815e-05	1.58632	1.05927	2.3756	0.0251288	0.658804	0.768212	0.472603	297	193	104
APOE	1.30911	0.942373	1.81857	0.108262	0.99	0.681033	1.43914	0.958007	0.518688	0.384106	0.678082	297	105	192
APOF	0.60491	0.373832	0.978825	0.040646	0.680135	0.417927	1.10685	0.120811	0.55992	0.880795	0.232877	297	53	244
APOH	0.826692	0.600646	1.13781	0.242887	0.925546	0.651586	1.31469	0.665692	0.510478	0.490066	0.60274	297	166	131
APOL1	0.560898	0.36509	0.861724	0.00830898	0.689886	0.435329	1.09329	0.114044	0.577883	0.84106	0.315068	297	71	226
APOL2	0.752488	0.546662	1.03581	0.0811308	0.838376	0.596365	1.1786	0.310392	0.539009	0.483444	0.616438	297	169	128
APOL3	0.492836	0.32282	0.752393	0.00104578	0.418775	0.261503	0.670632	0.000291272	0.569695	0.834437	0.356164	297	78	219
APOL4	0.545328	0.395619	0.75169	0.000212984	0.602513	0.428366	0.847456	0.00360346	0.611857	0.463576	0.739726	297	190	107
APOL5	1.11015	0.783194	1.5736	0.557168	1.21391	0.839613	1.75506	0.302744	0.502381	0.701987	0.349315	297	201	96
APOL6	0.441756	0.301302	0.647683	2.85436e-05	0.46247	0.30421	0.703062	0.000307961	0.648236	0.781457	0.465753	297	102	195
APOLD1	2.26324	1.61135	3.17886	2.44895e-06	2.01634	1.36999	2.96762	0.000375911	0.654268	0.668874	0.609589	297	158	139
APOLD1 /// DDX47	0.745605	0.529141	1.05062	0.0933994	0.918007	0.637344	1.32227	0.645866	0.543727	0.688742	0.431507	297	111	186
APOM	0.508958	0.368565	0.702829	4.10548e-05	0.606037	0.429758	0.85462	0.00429315	0.621745	0.443709	0.787671	297	200	97
APOO	0.57052	0.400397	0.812927	0.00189396	0.858369	0.555592	1.32615	0.491385	0.561372	0.291391	0.849315	297	232	65
APOOL	1.52141	1.07029	2.16268	0.0193605	1.70243	1.18169	2.45264	0.00428824	0.560238	0.708609	0.417808	297	192	105
APOPT1	1.60199	1.16013	2.21214	0.00420914	1.11036	0.784809	1.57095	0.55433	0.590402	0.430464	0.746575	297	102	195
APP	1.41073	0.949361	2.09632	0.0886032	1.65338	1.09613	2.49391	0.0165004	0.505035	0.205298	0.856164	297	52	245
APPBP2	1.62991	1.16046	2.28927	0.00482372	1.64047	1.13196	2.3774	0.00892941	0.546539	0.331126	0.794521	297	80	217
APPL1	0.561404	0.37016	0.851454	0.00659378	0.673038	0.433494	1.04495	0.0777213	0.55738	0.827815	0.328767	297	75	222
APPL2	0.724468	0.519192	1.0109	0.0579385	0.924929	0.635459	1.34626	0.683665	0.529575	0.364238	0.739726	297	205	92
APRT	0.478878	0.3358	0.682921	4.78362e-05	0.628058	0.420266	0.938588	0.0232583	0.577111	0.291391	0.890411	297	238	59
APTR	0.766576	0.554098	1.06053	0.108475	0.910519	0.631745	1.31231	0.615223	0.506418	0.596026	0.479452	297	132	165
APTX	0.492881	0.35757	0.679396	1.55584e-05	0.606693	0.424099	0.867901	0.00622858	0.61848	0.470199	0.773973	297	194	103
AQP1	1.39213	0.979307	1.97897	0.0652631	1.14831	0.774985	1.70149	0.490608	0.539599	0.291391	0.808219	297	72	225
AQP10	0.583331	0.382105	0.890527	0.0125212	0.583201	0.358124	0.949736	0.0302169	0.533929	0.178808	0.910959	297	258	39
AQP11	0.527743	0.378887	0.735081	0.000156598	0.818873	0.558206	1.20126	0.306753	0.583371	0.377483	0.821918	297	215	82
AQP12A /// AQP12B	0.575116	0.404622	0.817452	0.00204582	0.650727	0.437045	0.968883	0.0343777	0.568584	0.298013	0.842466	297	230	67
AQP2	0.491504	0.347039	0.696106	6.33377e-05	0.611407	0.418031	0.894237	0.0112059	0.585957	0.311258	0.856164	297	230	67
AQP3	0.788643	0.560835	1.10898	0.172192	0.776905	0.543186	1.11119	0.166804	0.517146	0.331126	0.739726	297	210	87
AQP4	1.46823	0.955481	2.25614	0.0797409	1.23498	0.749112	2.03597	0.407986	0.516783	0.165563	0.90411	297	39	258
AQP4-AS1	0.691021	0.491307	0.971918	0.0337007	0.798215	0.555406	1.14717	0.223236	0.490474	0.331126	0.780822	297	216	81
AQP5	1.47954	1.00108	2.18669	0.0493708	1.6862	1.11075	2.55978	0.0141624	0.515876	0.211921	0.890411	297	48	249
AQP6	0.713404	0.51193	0.994168	0.0460968	0.835432	0.581217	1.20084	0.331398	0.543681	0.370861	0.739726	297	204	93
AQP7 /// LOC100509620 /// LOC101930168	0.753666	0.541593	1.04878	0.0934528	0.738528	0.524828	1.03924	0.0820174	0.521455	0.635762	0.452055	297	122	175
AQP8	0.770056	0.556757	1.06507	0.114337	0.842694	0.601529	1.18055	0.319726	0.527851	0.596026	0.513699	297	137	160
AQP9	0.695915	0.501092	0.966484	0.0305105	0.848446	0.600543	1.19868	0.35127	0.573211	0.622517	0.534247	297	136	161
AQPEP	0.82497	0.599274	1.13566	0.238057	0.70272	0.497909	0.99178	0.0447584	0.500953	0.483444	0.568493	297	162	135
AQR	1.87888	1.31221	2.69027	0.000574158	1.60335	1.07439	2.39272	0.0208188	0.592216	0.728477	0.479452	297	186	111
AR	1.86308	1.3325	2.60491	0.000274132	1.67191	1.08394	2.57882	0.0200982	0.586773	0.350993	0.821918	297	79	218
ARAF	1.27258	0.809613	2.00031	0.296177	1.00135	0.629313	1.59334	0.995444	0.504128	0.854305	0.212329	297	244	53
ARAP1	1.93065	1.34821	2.76471	0.000329658	1.4677	0.990697	2.17437	0.0557027	0.608636	0.728477	0.5	297	183	114
ARAP2 /// LOC101928667	0.452599	0.326112	0.628145	2.13229e-06	0.545571	0.377459	0.788556	0.0012646	0.615985	0.403974	0.821918	297	211	86
ARAP3	2.18157	1.34809	3.53037	0.00149252	1.40543	0.832774	2.37187	0.202441	0.573755	0.874172	0.287671	297	236	61
ARC	1.32982	0.92886	1.90387	0.119497	1.39875	0.960107	2.0378	0.0804784	0.537581	0.728477	0.376712	297	201	96
ARCN1	0.653187	0.468609	0.910468	0.0119528	0.633611	0.440238	0.911923	0.0140394	0.553252	0.370861	0.760274	297	207	90
AREG	0.626363	0.444059	0.883511	0.00768356	0.925204	0.625535	1.36843	0.697065	0.559512	0.324503	0.80137	297	220	77
AREL1	0.469744	0.340783	0.647508	3.94655e-06	0.559686	0.382757	0.818401	0.00275645	0.636805	0.503311	0.732877	297	183	114
ARF1	1.47798	1.03465	2.11128	0.0317788	0.912981	0.61899	1.3466	0.646129	0.57498	0.721854	0.424658	297	193	104
ARF1 /// MIR3620	0.630133	0.453771	0.875041	0.00583741	0.767288	0.535901	1.09858	0.148028	0.594212	0.622517	0.561644	297	140	157
ARF1P1 /// ARF1P1	0.558344	0.400942	0.777541	0.00056232	0.730414	0.498607	1.06999	0.106814	0.578744	0.377483	0.787671	297	210	87
ARF3	0.681316	0.492419	0.942675	0.0205412	0.94766	0.65991	1.36088	0.770931	0.555293	0.417219	0.732877	297	196	101
ARF4	0.505991	0.340798	0.751256	0.000729354	0.610242	0.401129	0.928368	0.0210454	0.593532	0.801325	0.40411	297	90	207
ARF5	0.824871	0.597084	1.13956	0.242948	1.19488	0.830892	1.71831	0.336792	0.520503	0.430464	0.636986	297	180	117
ARF6	0.406563	0.285243	0.579483	6.44244e-07	0.515758	0.345251	0.770472	0.00122378	0.659485	0.721854	0.582192	297	128	169
ARFGAP1	0.473237	0.277189	0.807943	0.00611773	0.486966	0.271014	0.874996	0.0161028	0.488161	0.10596	0.965753	297	277	20
ARFGAP2	0.618125	0.41633	0.917729	0.0170451	0.675289	0.443895	1.0273	0.0666361	0.50694	0.211921	0.883562	297	249	48
ARFGAP3	0.682996	0.485702	0.960431	0.028373	0.734397	0.514776	1.04772	0.0885966	0.556609	0.682119	0.452055	297	115	182
ARFGEF1	0.581055	0.412357	0.818769	0.00191777	0.700098	0.482296	1.01626	0.0607713	0.58319	0.688742	0.493151	297	120	177
ARFGEF2	1.2729	0.918666	1.76372	0.147021	1.37128	0.943592	1.99281	0.097817	0.477093	0.397351	0.678082	297	107	190
ARFIP1	0.565837	0.411106	0.778804	0.000476243	0.714435	0.500319	1.02018	0.0643107	0.613762	0.516556	0.691781	297	175	122
ARFIP2	0.551338	0.371098	0.819121	0.00320067	0.87093	0.52223	1.45246	0.596405	0.558469	0.211921	0.910959	297	253	44
ARFRP1	0.772156	0.561056	1.06268	0.112548	0.864134	0.611029	1.22208	0.40892	0.528032	0.496689	0.60274	297	165	132
ARG1	0.526821	0.380863	0.728712	0.000107973	0.717221	0.503537	1.02158	0.0655279	0.581647	0.423841	0.773973	297	201	96
ARG2	0.843514	0.612667	1.16134	0.296889	1.04815	0.742024	1.48058	0.789574	0.530028	0.483444	0.609589	297	168	129
ARGLU1	1.37413	0.995676	1.89643	0.0531625	1.15911	0.816794	1.6449	0.408353	0.562279	0.443709	0.691781	297	112	185
ARHGAP1	0.635714	0.419031	0.964447	0.0331558	0.670441	0.432082	1.04029	0.0744669	0.543772	0.827815	0.287671	297	69	228
ARHGAP10	1.73774	1.26232	2.39222	0.000702986	1.67279	1.18829	2.35483	0.00319141	0.597478	0.490066	0.684932	297	120	177
ARHGAP11A	0.549987	0.378029	0.800165	0.00177564	0.752102	0.471146	1.2006	0.232543	0.623923	0.768212	0.438356	297	100	197
ARHGAP11B /// LOC100288637	0.494523	0.332702	0.735051	0.000497433	0.615417	0.388832	0.974039	0.0382425	0.575388	0.211921	0.924658	297	255	42
ARHGAP12	0.612905	0.434034	0.865491	0.00542861	0.728068	0.496239	1.0682	0.104668	0.556065	0.317881	0.821918	297	224	73
ARHGAP15 /// LOC101928361	1.56039	1.12795	2.15861	0.00720667	0.879332	0.574678	1.34549	0.553493	0.581602	0.410596	0.746575	297	99	198
ARHGAP17	0.723764	0.471137	1.11185	0.139967	0.53296	0.341074	0.8328	0.00572078	0.531774	0.84106	0.246575	297	61	236
ARHGAP18	0.667866	0.484091	0.921406	0.0139523	0.65926	0.472386	0.920061	0.0142909	0.567495	0.569536	0.582192	297	151	146
ARHGAP19	0.639861	0.459187	0.891624	0.00835003	0.661219	0.450439	0.970632	0.0346727	0.578654	0.642384	0.527397	297	132	165
ARHGAP20	1.56442	1.12253	2.18027	0.00823082	1.04369	0.677676	1.60737	0.846129	0.577792	0.364238	0.780822	297	87	210
ARHGAP21	1.48059	0.976068	2.24588	0.0648894	1.67951	1.08269	2.60533	0.0206342	0.52023	0.178808	0.883562	297	44	253
ARHGAP22	1.57022	1.13959	2.16356	0.0057987	1.19839	0.813487	1.76542	0.359866	0.598657	0.456954	0.69863	297	113	184
ARHGAP22-IT1	0.902539	0.598643	1.36071	0.624457	0.91004	0.598185	1.38447	0.659693	0.49365	0.821192	0.212329	297	59	238
ARHGAP23	1.35212	0.980828	1.86396	0.0655075	0.902785	0.629598	1.29451	0.578094	0.543319	0.450331	0.664384	297	117	180
ARHGAP24	1.64033	1.18124	2.27783	0.00313386	1.05714	0.722913	1.5459	0.774424	0.601696	0.615894	0.568493	297	156	141
ARHGAP25	1.3101	0.91753	1.87064	0.13719	0.900386	0.597395	1.35705	0.616147	0.512111	0.278146	0.794521	297	72	225
ARHGAP26	0.539511	0.391306	0.743847	0.000166004	0.679315	0.484738	0.951996	0.024725	0.590583	0.556291	0.650685	297	163	134
ARHGAP26-AS1	0.526393	0.382198	0.724991	8.5293e-05	0.541732	0.384059	0.764137	0.000478056	0.617005	0.536424	0.705479	297	174	123
ARHGAP27	0.581155	0.421845	0.800629	0.000899311	0.696286	0.490945	0.987514	0.0423119	0.592851	0.529801	0.643836	297	166	131
ARHGAP28	1.61815	0.97673	2.68081	0.0616849	1.18509	0.683619	2.05443	0.545193	0.54418	0.887417	0.226027	297	247	50
ARHGAP29	1.95734	1.41557	2.70645	4.86635e-05	1.61891	1.12171	2.33651	0.010068	0.621065	0.582781	0.630137	297	142	155
ARHGAP30	0.867188	0.630051	1.19358	0.381965	0.709252	0.494046	1.0182	0.0625761	0.504944	0.523179	0.534247	297	151	146
ARHGAP31	1.41502	1.02547	1.95256	0.0345948	1.17132	0.805132	1.70406	0.40838	0.549034	0.556291	0.568493	297	147	150
ARHGAP32	0.520615	0.364425	0.743746	0.000334814	0.590104	0.397362	0.876337	0.00894338	0.637213	0.728477	0.486301	297	113	184
ARHGAP33	0.82877	0.589269	1.16561	0.280453	0.911575	0.627786	1.32365	0.626604	0.501452	0.331126	0.726027	297	208	89
ARHGAP35	0.603227	0.415994	0.874731	0.0076797	0.713033	0.480045	1.0591	0.0938338	0.536651	0.251656	0.869863	297	241	56
ARHGAP36	1.26693	0.917793	1.74887	0.150313	1.20913	0.863837	1.69245	0.268361	0.501429	0.430464	0.636986	297	118	179
ARHGAP39	0.674381	0.483367	0.940879	0.0204152	0.837918	0.581513	1.20738	0.342712	0.579878	0.649007	0.5	297	127	170
ARHGAP4	1.5131	1.09904	2.08316	0.0111199	1.16455	0.828694	1.63653	0.380197	0.597818	0.516556	0.643836	297	130	167
ARHGAP42	0.537544	0.388949	0.742909	0.000169823	0.594788	0.409268	0.864404	0.00645111	0.586365	0.437086	0.760274	297	197	100
ARHGAP44	1.36085	0.897179	2.06414	0.147194	1.40736	0.916102	2.16207	0.118773	0.529756	0.821192	0.280822	297	229	68
ARHGAP5	0.679839	0.485917	0.951151	0.0243056	0.88108	0.61404	1.26425	0.491947	0.530709	0.350993	0.773973	297	212	85
ARHGAP5-AS1	1.27509	0.925537	1.75665	0.137122	1.32323	0.939112	1.86447	0.109401	0.507484	0.543046	0.541096	297	149	148
ARHGAP6	1.56712	1.13702	2.1599	0.00606116	1.21908	0.845058	1.75865	0.289355	0.589812	0.549669	0.616438	297	139	158
ARHGAP8 /// PRR5-ARHGAP8	0.773554	0.562124	1.06451	0.11498	0.848197	0.590437	1.21848	0.373035	0.542638	0.503311	0.609589	297	165	132
ARHGAP9	1.21924	0.882113	1.68522	0.229989	0.962884	0.672683	1.37828	0.836252	0.505987	0.417219	0.650685	297	114	183
ARHGDIA	0.619242	0.440875	0.869772	0.0056941	0.693927	0.479496	1.00425	0.0526877	0.572031	0.337748	0.821918	297	221	76
ARHGDIB	0.743106	0.515571	1.07106	0.111404	0.568914	0.379877	0.852021	0.00619803	0.511068	0.264901	0.815068	297	231	66
ARHGDIG	0.574011	0.412275	0.799197	0.00101124	0.715679	0.500429	1.02351	0.0668571	0.590583	0.377483	0.773973	297	208	89
ARHGEF1	1.91031	1.2592	2.89812	0.00233645	1.60682	1.04135	2.47936	0.0321105	0.595074	0.821192	0.356164	297	218	79
ARHGEF1 /// LOC100505585	0.597944	0.365295	0.978763	0.0408216	0.446021	0.263601	0.754683	0.00262232	0.529484	0.887417	0.205479	297	48	249
ARHGEF10	2.29476	1.63885	3.2132	1.32419e-06	2.04214	1.40841	2.96101	0.000165505	0.679761	0.655629	0.636986	297	152	145
ARHGEF10L	0.726768	0.501396	1.05344	0.0919738	0.838732	0.565922	1.24305	0.380979	0.527624	0.761589	0.335616	297	86	211
ARHGEF11	1.18065	0.857404	1.62576	0.308957	1.27719	0.886139	1.84082	0.189578	0.500771	0.463576	0.609589	297	127	170
ARHGEF12	1.0329	0.73831	1.44503	0.850136	1.10253	0.770792	1.57703	0.593033	0.493786	0.344371	0.691781	297	97	200
ARHGEF15	1.64509	1.19015	2.27394	0.0025791	1.01365	0.701421	1.46488	0.942448	0.597886	0.582781	0.609589	297	145	152
ARHGEF16	0.681206	0.486532	0.953775	0.0253798	0.79957	0.52963	1.20709	0.287162	0.545632	0.350993	0.753425	297	209	88
ARHGEF17	2.52107	1.82985	3.4734	1.55245e-08	2.11161	1.47483	3.02334	4.47007e-05	0.670054	0.516556	0.794521	297	108	189
ARHGEF18	0.730681	0.528993	1.00927	0.0569121	0.782409	0.556965	1.09911	0.157063	0.52395	0.430464	0.712329	297	191	106
ARHGEF19	0.808963	0.579026	1.13021	0.214034	0.856196	0.586299	1.25034	0.421631	0.491472	0.357616	0.726027	297	204	93
ARHGEF2	1.41048	1.01088	1.96803	0.0430048	0.879815	0.602578	1.2846	0.507298	0.552209	0.357616	0.746575	297	91	206
ARHGEF25	2.42162	1.75077	3.34953	9.09732e-08	2.00559	1.3654	2.94592	0.000388729	0.656808	0.430464	0.842466	297	88	209
ARHGEF26	1.96647	1.42741	2.7091	3.51897e-05	1.57089	1.10753	2.22811	0.0113193	0.627143	0.483444	0.739726	297	111	186
ARHGEF26-AS1	2.25877	1.59405	3.20069	4.60591e-06	1.90687	1.26631	2.87147	0.00199875	0.589653	0.304636	0.890411	297	62	235
ARHGEF28	0.764307	0.553821	1.05479	0.101964	0.731829	0.515279	1.03938	0.0811308	0.520367	0.562914	0.520548	297	143	154
ARHGEF3	1.33128	0.955516	1.85482	0.0908283	1.26295	0.87841	1.81582	0.207612	0.542275	0.635762	0.472603	297	173	124
ARHGEF33	1.13716	0.823293	1.5707	0.435384	1.1591	0.829853	1.61897	0.386491	0.491155	0.576159	0.486301	297	162	135
ARHGEF34P /// OR2A4 /// OR2A7	0.595823	0.429911	0.825763	0.00187286	0.732936	0.50765	1.0582	0.0973026	0.568425	0.403974	0.760274	297	202	95
ARHGEF37	1.40194	0.875577	2.24473	0.159509	1.6472	0.998926	2.71619	0.0504941	0.540506	0.86755	0.212329	297	246	51
ARHGEF38	0.584618	0.420813	0.812186	0.00137375	0.585204	0.410926	0.833393	0.00297503	0.582328	0.622517	0.575342	297	142	155
ARHGEF39	0.50866	0.369207	0.700786	3.55253e-05	0.825886	0.556481	1.22572	0.342299	0.632949	0.516556	0.726027	297	180	117
ARHGEF4	1.20673	0.876289	1.66177	0.249714	1.27202	0.905346	1.7872	0.165497	0.515422	0.529801	0.541096	297	147	150
ARHGEF4 /// LOC101930241	2.00952	1.43298	2.81803	5.2278e-05	1.62303	1.13901	2.31273	0.00735512	0.620611	0.662252	0.582192	297	161	136
ARHGEF40	1.75608	1.20304	2.56335	0.00352448	1.6535	1.09011	2.50805	0.0179877	0.594031	0.768212	0.39726	297	204	93
ARHGEF5	0.629916	0.442095	0.897531	0.0105153	1.11044	0.699323	1.76324	0.657025	0.548716	0.291391	0.835616	297	230	67
ARHGEF6	1.76539	1.28056	2.43379	0.000521264	1.00106	0.656705	1.526	0.996056	0.568765	0.450331	0.739726	297	106	191
ARHGEF7	1.22004	0.868698	1.71347	0.251101	0.953235	0.665035	1.36633	0.7943	0.518325	0.668874	0.424658	297	185	112
ARHGEF7-AS2	0.796289	0.578059	1.0969	0.163328	0.896947	0.637076	1.26282	0.533226	0.517418	0.463576	0.636986	297	175	122
ARHGEF7-IT1	1.44168	1.02319	2.03132	0.0365253	1.30391	0.906298	1.87597	0.152761	0.533748	0.317881	0.808219	297	76	221
ARHGEF9	2.05247	1.37992	3.0528	0.000385641	1.90056	1.2413	2.90997	0.00313198	0.549624	0.205298	0.931507	297	41	256
ARID1A	0.777667	0.530753	1.13945	0.196993	0.765093	0.505061	1.159	0.206373	0.510206	0.781457	0.287671	297	76	221
ARID1B	0.755026	0.535933	1.06369	0.108074	1.04428	0.724778	1.50463	0.816136	0.539871	0.688742	0.410959	297	108	189
ARID2	1.65905	1.10021	2.50175	0.0157062	1.35792	0.880158	2.09501	0.166681	0.554296	0.81457	0.321918	297	222	75
ARID3A	0.718259	0.520234	0.991662	0.044342	0.789859	0.556217	1.12164	0.187371	0.526263	0.437086	0.69863	297	188	109
ARID3B	0.647715	0.466832	0.898683	0.00934124	0.82578	0.5761	1.18367	0.297383	0.568969	0.397351	0.753425	297	202	95
ARID4A	1.40085	0.985783	1.99069	0.0600944	1.19806	0.804706	1.78368	0.373512	0.531207	0.291391	0.80137	297	73	224
ARID4B	2.04642	1.47484	2.8395	1.82716e-05	1.59447	1.10994	2.29052	0.0115924	0.613263	0.609272	0.650685	297	143	154
ARID4B /// RBM34	0.706628	0.51345	0.972486	0.0330733	0.963304	0.681791	1.36105	0.832112	0.56618	0.516556	0.630137	297	166	131
ARID5A	2.33449	1.69192	3.2211	2.44923e-07	1.97233	1.37485	2.82947	0.000225187	0.65132	0.556291	0.726027	297	124	173
ARID5B	1.20191	0.869017	1.66232	0.26636	0.950936	0.674709	1.34025	0.773858	0.502087	0.589404	0.493151	297	163	134
ARIH1	1.62911	1.15558	2.29668	0.00534914	1.80371	1.26083	2.58036	0.0012442	0.577701	0.682119	0.465753	297	181	116
ARIH2	0.64201	0.460725	0.894627	0.00885233	0.622776	0.435857	0.889855	0.00929868	0.561598	0.370861	0.773973	297	209	88
ARIH2OS	1.9148	1.22662	2.98908	0.00425073	1.82262	1.13692	2.92187	0.0126711	0.509752	0.152318	0.945205	297	31	266
ARL1	0.651438	0.45739	0.927811	0.0175383	0.743621	0.501064	1.1036	0.1414	0.528214	0.721854	0.410959	297	103	194
ARL10	1.88918	1.34054	2.66238	0.000278786	1.54829	1.06393	2.25315	0.0223908	0.6305	0.682119	0.527397	297	172	125
ARL11	0.561074	0.397273	0.792413	0.00103472	0.535086	0.368532	0.776912	0.00101358	0.564003	0.317881	0.842466	297	227	70
ARL13B	1.28834	0.924589	1.79521	0.134455	1.16617	0.803209	1.69316	0.419051	0.508029	0.635762	0.445205	297	177	120
ARL14	0.743898	0.533675	1.03693	0.0808222	0.776546	0.534829	1.12751	0.183779	0.542865	0.642384	0.445205	297	120	177
ARL14EP	0.758476	0.515501	1.11597	0.1606	0.644031	0.424565	0.976942	0.0384809	0.483262	0.225166	0.842466	297	241	56
ARL15	0.787069	0.561587	1.10308	0.164438	0.835145	0.582358	1.19766	0.32739	0.509798	0.668874	0.39726	297	109	188
ARL16	1.67125	1.21241	2.30373	0.00171184	1.7432	1.24376	2.44319	0.00125341	0.550349	0.536424	0.623288	297	136	161
ARL17A /// ARL17B	0.561016	0.28584	1.1011	0.0929514	0.550676	0.273668	1.10807	0.0944627	0.50694	0.94702	0.116438	297	26	271
ARL17A /// ARL17B /// LOC100294341	0.850278	0.592301	1.22062	0.379266	1.00679	0.686381	1.47678	0.972372	0.49805	0.741722	0.315068	297	86	211
ARL2	1.60527	1.09944	2.34382	0.0142509	1.24856	0.844768	1.84537	0.265418	0.549261	0.231788	0.876712	297	53	244
ARL2BP	1.42822	0.97412	2.09399	0.0679018	1.32213	0.881999	1.98188	0.176371	0.538646	0.774834	0.321918	297	216	81
ARL3	1.56411	1.04299	2.34562	0.0305007	1.39228	0.903681	2.14506	0.133432	0.567586	0.807947	0.308219	297	223	74
ARL4A	0.56337	0.339798	0.934045	0.026117	0.633385	0.373698	1.07353	0.0898103	0.535471	0.89404	0.212329	297	48	249
ARL4C	1.46949	1.04249	2.07137	0.0279808	1.30427	0.887116	1.91759	0.17674	0.548988	0.682119	0.438356	297	185	112
ARL4D	1.99489	1.42622	2.7903	5.49178e-05	1.48042	1.00021	2.19118	0.0498775	0.617164	0.350993	0.849315	297	75	222
ARL5A /// LOC101929356	0.719561	0.505193	1.02489	0.0681943	0.718949	0.496169	1.04176	0.0811974	0.519142	0.291391	0.808219	297	226	71
ARL5B	0.548692	0.390692	0.770589	0.000532382	0.817247	0.557091	1.19889	0.301984	0.600653	0.337748	0.856164	297	226	71
ARL5C	0.504176	0.36517	0.696097	3.16613e-05	0.604264	0.4313	0.846592	0.00341224	0.613989	0.443709	0.794521	297	201	96
ARL6	1.3621	0.989201	1.87556	0.0582999	1.33011	0.942555	1.877	0.104525	0.549397	0.529801	0.589041	297	140	157
ARL6IP1	0.578906	0.419477	0.79893	0.000881683	0.778674	0.528368	1.14756	0.20611	0.586501	0.443709	0.732877	297	192	105
ARL6IP4	1.68033	1.21775	2.31864	0.00158232	1.45665	1.03402	2.05202	0.0314507	0.583598	0.443709	0.719178	297	108	189
ARL6IP5	1.51719	1.07662	2.13804	0.0172298	1.22814	0.843948	1.78724	0.283002	0.502132	0.317881	0.80137	297	77	220
ARL6IP6	0.605193	0.438343	0.835554	0.00227571	0.808143	0.558548	1.16927	0.25838	0.609634	0.443709	0.739726	297	193	104
ARL8A	1.26907	0.886494	1.81675	0.192997	1.12771	0.767885	1.65615	0.539897	0.521637	0.728477	0.349315	297	205	92
ARL8B	0.821409	0.586168	1.15106	0.253127	1.08701	0.748066	1.57952	0.661698	0.498322	0.344371	0.739726	297	208	89
ARL9	0.850675	0.614002	1.17857	0.330938	0.846243	0.59697	1.1996	0.348379	0.536106	0.609272	0.486301	297	131	166
ARMC1	0.494172	0.325667	0.749865	0.000923242	0.515943	0.328912	0.809325	0.00396458	0.54917	0.18543	0.938356	297	261	36
ARMC10	0.836219	0.602375	1.16084	0.28517	1.18272	0.817738	1.71062	0.372765	0.516874	0.622517	0.465753	297	126	171
ARMC12	0.678074	0.474763	0.968449	0.0326592	0.759892	0.522091	1.10601	0.151621	0.56246	0.728477	0.410959	297	102	195
ARMC2	1.33167	0.866934	2.04552	0.190897	1.07015	0.682619	1.67767	0.767588	0.522408	0.834437	0.246575	297	236	61
ARMC2-AS1 /// ATP5J2	0.468899	0.308643	0.712363	0.00038593	0.658475	0.391852	1.10651	0.114619	0.531888	0.18543	0.931507	297	260	37
ARMC3	0.825252	0.59749	1.13984	0.243761	0.745888	0.528942	1.05182	0.0945477	0.499728	0.582781	0.472603	297	133	164
ARMC4	2.11029	1.40503	3.16957	0.000320088	2.25887	1.43871	3.54656	0.000399626	0.554386	0.192053	0.938356	297	38	259
ARMC5	1.13408	0.798155	1.6114	0.482649	1.2942	0.889594	1.88282	0.177558	0.508029	0.708609	0.349315	297	202	95
ARMC6	1.8383	1.10901	3.04718	0.0182145	1.7857	1.03499	3.0809	0.0372005	0.486891	0.112583	0.952055	297	24	273
ARMC7	1.37116	0.992743	1.89383	0.0553953	1.65648	1.16155	2.3623	0.00532108	0.521954	0.423841	0.684932	297	110	187
ARMC8	0.872011	0.633727	1.19989	0.400368	0.860022	0.611033	1.21047	0.387209	0.486664	0.516556	0.527397	297	151	146
ARMC9	1.79634	1.30489	2.47287	0.000328401	1.69805	1.18737	2.42838	0.00372125	0.607865	0.503311	0.691781	297	121	176
ARMCX1	2.23355	1.60755	3.10333	1.67637e-06	1.63885	1.09787	2.44641	0.0156595	0.66207	0.615894	0.678082	297	140	157
ARMCX2	2.28957	1.66112	3.1558	4.19688e-07	2.04777	1.39315	3.00998	0.000265228	0.644244	0.470199	0.780822	297	103	194
ARMCX3	1.79387	1.27843	2.51711	0.000721669	1.53317	1.05505	2.22796	0.025028	0.57566	0.337748	0.815068	297	78	219
ARMCX4	1.857	1.34837	2.55749	0.000150464	1.71457	1.18242	2.48622	0.00445888	0.645287	0.483444	0.732877	297	112	185
ARMCX5	1.59603	1.02351	2.48881	0.0391629	1.43937	0.905642	2.28765	0.123391	0.564275	0.847682	0.273973	297	234	63
ARMCX5-GPRASP2 /// GPRASP2	2.08094	1.50326	2.88061	1.0013e-05	1.70636	1.19153	2.44364	0.00354156	0.664814	0.589404	0.678082	297	136	161
ARMCX6	2.1906	1.58787	3.0221	1.78457e-06	1.70338	1.19268	2.43274	0.00340092	0.629865	0.456954	0.80137	297	98	199
ARNT	2.15781	1.52046	3.06232	1.66347e-05	1.78849	1.21574	2.63106	0.00315859	0.569128	0.298013	0.876712	297	63	234
ARNT2	1.79308	1.25212	2.56776	0.00143705	1.34704	0.905584	2.00369	0.141441	0.572893	0.728477	0.472603	297	187	110
ARNTL	0.767899	0.558015	1.05673	0.104965	0.859589	0.617064	1.19743	0.371001	0.560238	0.523179	0.589041	297	159	138
ARNTL2	0.593418	0.427846	0.823065	0.00176846	0.665528	0.470445	0.941509	0.0214202	0.59834	0.403974	0.780822	297	205	92
ARNTL2-AS1	1.13365	0.821377	1.56465	0.445438	0.951944	0.677298	1.33796	0.77674	0.502903	0.430464	0.630137	297	119	178
ARPC1A	0.661184	0.480065	0.910636	0.0113049	0.841401	0.584197	1.21185	0.353555	0.555883	0.470199	0.684932	297	181	116
ARPC1B	0.733545	0.532961	1.00962	0.0572744	0.870611	0.622774	1.21708	0.417574	0.548762	0.496689	0.636986	297	170	127
ARPC2	0.609512	0.43066	0.862641	0.00521044	0.582518	0.406568	0.834613	0.00322642	0.552481	0.311258	0.849315	297	229	68
ARPC3	0.590503	0.42739	0.815868	0.00140433	0.63631	0.450813	0.898136	0.010142	0.604531	0.582781	0.616438	297	154	143
ARPC4	0.621163	0.444236	0.868555	0.00537135	0.692077	0.484325	0.988944	0.0432785	0.56051	0.357616	0.787671	297	213	84
ARPC4 /// ARPC4-TTLL3	0.610974	0.40947	0.911641	0.0158203	0.782132	0.503344	1.21533	0.274507	0.573301	0.807947	0.328767	297	78	219
ARPC4 /// ARPC4-TTLL3 /// TTLL3	1.52688	1.09071	2.13746	0.0136677	1.49524	1.03971	2.15034	0.0300039	0.563957	0.344371	0.794521	297	82	215
ARPC5	0.636321	0.462044	0.876334	0.00563347	0.771417	0.548066	1.08579	0.13674	0.592715	0.536424	0.643836	297	165	132
ARPC5L	0.460275	0.323258	0.65537	1.68025e-05	0.725291	0.472332	1.11372	0.142171	0.586728	0.298013	0.89726	297	238	59
ARPIN	0.725081	0.522269	1.00665	0.0548111	0.884423	0.628115	1.24532	0.481786	0.558877	0.622517	0.506849	297	132	165
ARPP19	0.82622	0.585243	1.16642	0.277919	1.18708	0.797294	1.76742	0.398405	0.527307	0.695364	0.390411	297	104	193
ARPP21	0.859127	0.622019	1.18662	0.356787	0.901389	0.643881	1.26188	0.545289	0.500953	0.582781	0.486301	297	135	162
ARR3	0.577587	0.409073	0.81552	0.00181709	0.668337	0.457354	0.976649	0.0373385	0.58201	0.317881	0.835616	297	226	71
ARRB1	1.12976	0.818565	1.55927	0.457994	1.05226	0.739368	1.49757	0.777238	0.508119	0.569536	0.5	297	159	138
ARRB2	0.67898	0.491493	0.937987	0.0188614	0.617586	0.441912	0.863095	0.00477082	0.57507	0.582781	0.575342	297	148	149
ARRDC1	0.594027	0.423807	0.832617	0.00250046	0.948516	0.631675	1.42428	0.798849	0.573301	0.344371	0.815068	297	219	78
ARRDC2	1.41741	0.92891	2.16281	0.105677	1.28972	0.834917	1.99228	0.25148	0.531185	0.172185	0.89726	297	41	256
ARRDC3	1.4911	1.08286	2.05324	0.0143773	1.25115	0.864501	1.81074	0.234839	0.555475	0.476821	0.657534	297	122	175
ARRDC3-AS1	0.590005	0.418627	0.831543	0.0025816	0.769728	0.528659	1.12072	0.172137	0.588406	0.688742	0.479452	297	118	179
ARRDC4	1.69035	1.22725	2.32821	0.00131102	1.72861	1.1917	2.50742	0.00392449	0.601515	0.470199	0.719178	297	112	185
ARSA	0.787075	0.570796	1.0853	0.144127	0.779361	0.554509	1.09539	0.151186	0.526445	0.450331	0.636986	297	177	120
ARSB	1.17435	0.851064	1.62044	0.327929	0.819227	0.565448	1.18691	0.291831	0.500726	0.437086	0.60274	297	124	173
ARSD	1.43431	1.04048	1.97719	0.0276451	1.62393	1.12517	2.34378	0.00959967	0.542003	0.450331	0.671233	297	116	181
ARSE	1.55221	1.09247	2.20541	0.0141485	1.39223	0.948618	2.04328	0.090935	0.565046	0.708609	0.424658	297	191	106
ARSF	0.817231	0.591297	1.12949	0.221542	1.10383	0.769636	1.58315	0.591332	0.54037	0.423841	0.657534	297	184	113
ARSG	0.682899	0.437865	1.06506	0.0925681	0.649507	0.405179	1.04117	0.073068	0.512338	0.15894	0.910959	297	261	36
ARSI	1.24982	0.904324	1.72731	0.176763	1.01202	0.716929	1.42858	0.945828	0.532455	0.582781	0.493151	297	162	135
ARSJ	0.687303	0.489586	0.964867	0.0302645	0.846744	0.588055	1.21923	0.371142	0.540325	0.675497	0.445205	297	115	182
ARSK	1.36357	0.954685	1.94757	0.0881954	1.41622	0.956939	2.09592	0.0818778	0.521228	0.721854	0.369863	297	201	96
ART1	0.411934	0.286452	0.592386	1.71199e-06	0.554518	0.36684	0.838212	0.00515559	0.588451	0.271523	0.917808	297	245	52
ART3	0.687286	0.492564	0.958987	0.0273594	0.622384	0.433135	0.894322	0.0103523	0.540506	0.649007	0.458904	297	121	176
ART4	1.44853	1.05096	1.99651	0.0236002	1.00767	0.706498	1.43724	0.966348	0.546267	0.450331	0.678082	297	115	182
ART5	0.73621	0.515491	1.05143	0.0921546	0.944077	0.636958	1.39928	0.774393	0.545269	0.284768	0.808219	297	227	70
ARTN	0.523291	0.378509	0.723454	8.89789e-05	0.632518	0.440278	0.908697	0.0132153	0.613354	0.423841	0.80137	297	205	92
ARV1	0.734127	0.532781	1.01156	0.0588028	0.795492	0.556884	1.13634	0.208573	0.522362	0.463576	0.630137	297	174	123
ARVCF	1.06734	0.77517	1.46964	0.689625	1.10826	0.791688	1.55142	0.549222	0.499501	0.529801	0.506849	297	152	145
ARX	0.540657	0.385348	0.758561	0.000371827	0.473682	0.327187	0.68577	7.55469e-05	0.576159	0.344371	0.815068	297	219	78
AS3MT	2.1254	1.53571	2.94152	5.4334e-06	1.99651	1.38111	2.88612	0.00023574	0.642792	0.582781	0.664384	297	137	160
ASAH1	0.693422	0.490236	0.98082	0.0385057	0.617782	0.422021	0.90435	0.0132472	0.557516	0.701987	0.438356	297	110	187
ASAH2B	0.667493	0.485045	0.918567	0.0130877	1.00457	0.684839	1.47357	0.98139	0.56305	0.496689	0.650685	297	172	125
ASAP1	1.85918	1.3477	2.56478	0.000158246	1.40069	0.96567	2.03168	0.0757557	0.591763	0.556291	0.643836	297	136	161
ASAP1-IT1	1.21867	0.882671	1.68257	0.229504	0.87558	0.620342	1.23583	0.449842	0.528282	0.430464	0.650685	297	116	181
ASAP1-IT2	1.53797	1.114	2.12329	0.00889487	1.15962	0.810902	1.65831	0.417104	0.556564	0.430464	0.726027	297	105	192
ASAP2	0.661676	0.480477	0.911208	0.0114228	0.802484	0.55601	1.15822	0.239841	0.550395	0.483444	0.678082	297	178	119
ASAP3	1.46295	1.04526	2.04754	0.0265519	1.06423	0.720172	1.57266	0.754713	0.572848	0.655629	0.486301	297	174	123
ASB1	1.73466	1.13665	2.64729	0.0106548	1.32767	0.840446	2.09736	0.224409	0.57312	0.827815	0.308219	297	226	71
ASB10	0.726733	0.50614	1.04347	0.0837337	0.779498	0.533743	1.13841	0.197355	0.543273	0.741722	0.363014	297	93	204
ASB11	0.706769	0.501508	0.996041	0.0474092	0.821815	0.571771	1.18121	0.289044	0.524494	0.688742	0.424658	297	110	187
ASB12	0.788107	0.555931	1.11725	0.18112	0.69999	0.487322	1.00547	0.0535512	0.509752	0.708609	0.356164	297	97	200
ASB12 /// MTMR8	0.662938	0.480606	0.914442	0.0122451	0.7433	0.528179	1.04604	0.0887989	0.558605	0.450331	0.671233	297	182	115
ASB13	0.660433	0.426721	1.02215	0.0626501	0.75929	0.470102	1.22637	0.260275	0.520049	0.847682	0.260274	297	62	235
ASB14	0.643508	0.457579	0.904986	0.0112828	0.731235	0.508529	1.05147	0.0911964	0.515649	0.331126	0.787671	297	217	80
ASB15	0.772558	0.546158	1.09281	0.144735	0.796567	0.553184	1.14703	0.221482	0.531911	0.311258	0.780822	297	219	78
ASB16	0.808691	0.586568	1.11493	0.194983	1.22078	0.854811	1.74342	0.272569	0.539236	0.450331	0.636986	297	177	120
ASB16-AS1	0.624832	0.426335	0.915747	0.0158981	0.850463	0.560545	1.29033	0.446335	0.562188	0.231788	0.890411	297	247	50
ASB17	1.10169	0.796403	1.524	0.558587	1.24761	0.893373	1.74232	0.194188	0.483172	0.589404	0.431507	297	172	125
ASB2	2.22457	1.61213	3.06969	1.13485e-06	1.59418	1.06291	2.39098	0.0241345	0.610043	0.456954	0.808219	297	97	200
ASB3 /// AX747197	0.653559	0.474023	0.901095	0.00944528	0.625085	0.445024	0.878	0.00671778	0.575932	0.556291	0.59589	297	155	142
ASB3 /// GPR75-ASB3	1.76753	1.28268	2.43566	0.000498145	1.26166	0.893611	1.78129	0.186579	0.596344	0.456954	0.732877	297	108	189
ASB4	0.483869	0.301335	0.776973	0.00266178	0.558674	0.336514	0.927499	0.024388	0.513472	0.139073	0.952055	297	270	27
ASB5	3.06331	2.10817	4.45119	4.30946e-09	2.90884	1.68919	5.00912	0.000117883	0.595346	0.251656	0.958904	297	44	253
ASB6	0.864724	0.627765	1.19113	0.373711	1.1264	0.796477	1.59299	0.500876	0.518235	0.549669	0.513699	297	144	153
ASB7	0.584202	0.418972	0.814593	0.00152985	0.814357	0.559255	1.18582	0.284147	0.542003	0.370861	0.808219	297	214	83
ASB8	1.48921	1.06742	2.07768	0.0190804	1.29182	0.892633	1.86954	0.174554	0.571487	0.642384	0.506849	297	169	128
ASB9	1.42491	0.920918	2.20471	0.111827	1.28027	0.817764	2.00437	0.280003	0.5044	0.84106	0.226027	297	240	57
ASCC1	0.774633	0.557374	1.07658	0.128363	0.957808	0.659464	1.39112	0.820904	0.518597	0.384106	0.712329	297	198	99
ASCC2	1.19871	0.856871	1.67693	0.289984	1.24434	0.867745	1.78439	0.23458	0.522136	0.655629	0.424658	297	183	114
ASCC3	0.497813	0.361134	0.686221	2.05058e-05	0.567833	0.39688	0.812422	0.0019572	0.631588	0.543046	0.705479	297	173	124
ASCL1	1.25514	0.865888	1.81937	0.230245	1.15206	0.783008	1.69507	0.472477	0.508573	0.245033	0.821918	297	63	234
ASCL2	0.605352	0.424992	0.862253	0.00541697	0.763407	0.521787	1.11691	0.164386	0.545904	0.721854	0.431507	297	106	191
ASCL3	0.678803	0.43183	1.06703	0.093183	0.649557	0.40489	1.04207	0.0736022	0.533249	0.860927	0.239726	297	57	240
ASCL5	0.707619	0.507135	0.987359	0.0418695	0.687885	0.484199	0.977255	0.0367625	0.533838	0.364238	0.732877	297	204	93
ASF1A	0.779821	0.503964	1.20667	0.264201	0.842743	0.53066	1.33836	0.468456	0.502948	0.847682	0.219178	297	56	241
ASF1B	0.58696	0.423477	0.813554	0.00138004	0.779155	0.525286	1.15572	0.21478	0.638302	0.609272	0.60274	297	148	149
ASGR1	1.86417	1.23569	2.81229	0.00299032	1.80452	1.16807	2.78773	0.00781287	0.525084	0.18543	0.910959	297	41	256
ASGR2	0.806815	0.58441	1.11386	0.192023	0.870616	0.623762	1.21516	0.415393	0.530073	0.576159	0.534247	297	143	154
ASH1L	2.52081	1.82839	3.47546	1.67362e-08	2.40318	1.70659	3.38412	5.1556e-07	0.636124	0.496689	0.808219	297	103	194
ASH1L-AS1	1.27852	0.902062	1.81208	0.167358	1.4572	0.987633	2.15002	0.0577941	0.525583	0.298013	0.787671	297	76	221
ASH2L	0.63924	0.464252	0.880184	0.00610643	0.70554	0.503545	0.988565	0.0426837	0.573211	0.523179	0.630137	297	165	132
ASIC1	1.41744	1.02944	1.95168	0.0325365	1.76335	1.24786	2.49178	0.00130417	0.541096	0.483444	0.650685	297	124	173
ASIC2	0.542481	0.386902	0.760621	0.000390097	0.606671	0.422115	0.871917	0.00692144	0.571147	0.344371	0.828767	297	221	76
ASIC4	0.802143	0.570392	1.12805	0.205038	0.742241	0.524154	1.05107	0.0930818	0.522158	0.682119	0.410959	297	109	188
ASIC5	0.666942	0.469209	0.948002	0.0239717	0.739117	0.509635	1.07193	0.11099	0.561644	0.298013	0.815068	297	226	71
ASIP	0.570953	0.411827	0.791564	0.000773102	0.783039	0.5531	1.10857	0.167937	0.585231	0.403974	0.787671	297	206	91
ASL	0.722666	0.524448	0.995802	0.0470686	0.813049	0.558715	1.18316	0.279577	0.530005	0.463576	0.636986	297	175	122
ASMT	1.12479	0.770712	1.64155	0.542058	0.9865	0.659997	1.47452	0.947155	0.475234	0.231788	0.80137	297	64	233
ASMTL	0.636299	0.383976	1.05443	0.0793802	0.569612	0.332615	0.975477	0.0403232	0.508165	0.119205	0.945205	297	272	25
ASMTL-AS1	1.61441	0.873496	2.98377	0.126419	2.00146	1.05318	3.80353	0.0341626	0.497188	0.927152	0.136986	297	266	31
ASNA1	0.685167	0.497586	0.943463	0.0205288	0.910052	0.637826	1.29847	0.603247	0.582487	0.509934	0.643836	297	169	128
ASNS	0.76288	0.55445	1.04967	0.0964586	0.989946	0.691813	1.41656	0.955923	0.524993	0.503311	0.59589	297	163	134
ASNSD1	0.713143	0.480409	1.05862	0.0934811	0.919568	0.610746	1.38454	0.687976	0.516783	0.801325	0.280822	297	72	225
ASPA	1.57416	1.13875	2.17606	0.00602462	1.42589	0.988497	2.05683	0.0576867	0.560646	0.417219	0.746575	297	100	197
ASPDH	0.803948	0.556662	1.16109	0.244594	0.978389	0.661056	1.44805	0.913028	0.516057	0.754967	0.321918	297	85	212
ASPG	0.710186	0.512453	0.984217	0.0398289	0.745031	0.524412	1.05846	0.100419	0.56305	0.403974	0.712329	297	195	102
[truncated: 22,078 more rows]

## Sheet: Supplementary Table 3
YUSH dataset
	Univariate				Multivariate
[truncated: 25,115 more rows]

## Sheet: Supplementary Table 4
KUGH dataset
	Univariate				Multivariate
[truncated: 25,150 more rows]

## Sheet: Supplementary Table 5
NCCS dataset
[truncated: 23,522 more rows]

## Sheet: Supplementary Table 6
TCGA
[truncated: 50 more rows]

## Sheet: Supplementary Table 7
ACRG
[truncated: 32 more rows]

[truncated: 5 more sheets: Supplementary Table 8, Supplementary Table 9, Supplementary Table 10, Supplementary Table 11, Supplementary Table 12]
